# Supplementary material for: What components of smoking cessation care during pregnancy are implemented by health providers? A systematic review and meta-analysis
Source: PubMed Central journal article supplement — BMJ Open. 2019 Aug 18;9(8):e026037. doi: 10.1136/bmjopen-2018-026037 (PMC6701616; doi:10.1136/bmjopen-2018-026037), 2019-08-18
Supplement: bmjopen-2018-026037.draft_revisions.pdf [file bmjopen-2018-026037.draft_revisions.pdf]

# BMJ Open

BMJ Open is committed to open peer review. As part of this commitment we make the peer review history of every article we publish publicly available.

When an article is published we post the peer reviewers' comments and the authors' responses online. We also post the versions of the paper that were used during peer review. These are the versions that the peer review comments apply to.

The versions of the paper that follow are the versions that were submitted during the peer review process. They are not the versions of record or the final published versions. They should not be cited or distributed as the published version of this manuscript.

BMJ Open is an open access journal and the full, final, typeset and author-corrected version of record of the manuscript is available on our site with no access controls, subscription charges or pay-per-view fees (<http://bmjopen.bmj.com>).

If you have any questions on BMJ Open's open peer review process please email [info.bmjopen@bmj.com](mailto:info.bmjopen@bmj.com)

# BMJ Open

## What components of smoking cessation care during pregnancy are implemented by health providers? a systematic review and meta-analysis

|                               |                                                                                                                                                                                                                                                                                                                                                                                                                                                                                                            |
|-------------------------------|------------------------------------------------------------------------------------------------------------------------------------------------------------------------------------------------------------------------------------------------------------------------------------------------------------------------------------------------------------------------------------------------------------------------------------------------------------------------------------------------------------|
| Journal:                      | <i>BMJ Open</i>                                                                                                                                                                                                                                                                                                                                                                                                                                                                                            |
| Manuscript ID                 | bmjopen-2018-026037                                                                                                                                                                                                                                                                                                                                                                                                                                                                                        |
| Article Type:                 | Research                                                                                                                                                                                                                                                                                                                                                                                                                                                                                                   |
| Date Submitted by the Author: | 14-Aug-2018                                                                                                                                                                                                                                                                                                                                                                                                                                                                                                |
| Complete List of Authors:     | Gould, Gillian; The University of Newcastle, School of Medicine and Public Health;<br>Twyman, Laura<br>Stevenson, Leah; The University of Newcastle, School of Medicine and Public Health<br>Gribbin, Gabrielle; The University of Newcastle, School of Medicine and Public Health<br>Bonevski, Billie; University of Newcastle, School of Medicine & Public Health<br>Plaazzi, Kerrin; Hunter Medical Research Institute<br>Bar Zeev, Yael; University of Newcastle, School of Medicine and Public Health |
| Keywords:                     | Maternal medicine < OBSTETRICS, PRIMARY CARE, PUBLIC HEALTH, Substance misuse < PSYCHIATRY                                                                                                                                                                                                                                                                                                                                                                                                                 |
|                               |                                                                                                                                                                                                                                                                                                                                                                                                                                                                                                            |

SCHOLARONE™  
Manuscripts

Only

1  
2  
3 **What components of smoking cessation care during pregnancy are implemented by**  
4  
5 **health providers? a systematic review and meta-analysis**  
6  
7

8  
9 Gillian S Gould<sup>1,2</sup>, (corresponding author) [gillian.gould@newcastle.edu.au](mailto:gillian.gould@newcastle.edu.au)

10  
11 Laura Twyman<sup>1</sup>, [Laura.Twyman@newcastle.edu.au](mailto:Laura.Twyman@newcastle.edu.au)

12  
13 Leah Stevenson<sup>1</sup>, [leah.stevenson@my.jcu.edu.au](mailto:leah.stevenson@my.jcu.edu.au)

14  
15 Gabrielle R Gribbin,<sup>1</sup> [gabrielle.gribbin@newcastle.edu.au](mailto:gabrielle.gribbin@newcastle.edu.au)

16  
17 Billie Bonevski<sup>1</sup>, [billie.bonevski@newcastle.edu.au](mailto:billie.bonevski@newcastle.edu.au)

18  
19 Kerrin Palazzi<sup>2</sup>, [Kerrin.Palazzi@hmri.org.au](mailto:Kerrin.Palazzi@hmri.org.au)

20  
21 Yael Bar-Zeev<sup>1</sup> [Yael.BarZeev@uon.edu.au](mailto:Yael.BarZeev@uon.edu.au)  
22  
23  
24  
25

26  
27 <sup>1</sup> School of Medicine and Public Health, University of Newcastle, New South Wales (NSW),  
28  
29 Australia

30  
31 <sup>2</sup>Hunter Medical Research Institute, NSW, Australia  
32  
33  
34  
35  
36  
37  
38  
39  
40  
41  
42  
43  
44  
45  
46  
47  
48  
49  
50  
51  
52  
53  
54  
55  
56  
57  
58  
59  
60

## Abstract

**Background** Pregnancy is an opportunity for health providers (HPs) to support women to stop smoking.

**Objectives** Identify the pooled prevalence for HP in providing various components of smoking cessation care (SCC) to women who smoke during pregnancy.

**Design** A systematic review synthesising original articles that reported on 1) prevalence of HPs performing the 5As ('Ask', 'Advise', 'Assess', 'Assist', 'Arrange'), prescribing nicotine replacement therapy (NRT), and other SCC, and 2) factors associated with SCC practices.

**Data Sources** MEDLINE, EMBASE, CINAHL and PsycINFO databases searched using "smoking", "pregnancy" and "HP practices".

**Eligibility criteria for selecting studies** Studies included any design except interventions (self-report, audit, observed consultations, women's reports), in English, with no date restriction, up to June 2017.

**Participants** Health providers of any profession

**Data extraction, appraisal and analysis** Data were extracted, then appraised with the Hawker tool. Meta-analyses pooled percentages for performing each of the 5As and prescribing NRT, using e.g., 'often/always' and 'always/all'. Meta-regressions were performed of 5As for 'often/always'.

**Results** Of 3933 papers, 54 were included ( $n=29,225$  participants): 33 for meta-analysis. HPs included general practitioners, obstetricians, midwives and others from 10 countries. Pooled percentages of studies reporting practices 'often/always' were: 'Ask' ( $n=9$ ) 91.6%

(95%CI:88.2,95); 'Advise' ( $n=7$ ) 90% (CI:72.5,99.3), 'Assess' ( $n=3$ ) 79.2% (CI:76.5,81.8), 'Assist (cessation support)' ( $n=5$ ) 59.1% (CI:56, 62.2), 'Arrange (referral)' ( $n=6$ ) 33.3% (CI:20.4,46.2), and 'prescribing NRT' ( $n=6$ ) 25.4% (CI:12.8,38). Heterogeneity ( $I^2$ ) was 95.9%-99.1%. Meta-regressions for 'Arrange' were significant for year ( $p=0.013$ ) and country ( $p=0.037$ ).

**Conclusions** HPs 'Ask', 'Advise' and 'Assess' most pregnant women about smoking. 'Assist', 'Arrange' and 'prescribing NRT' are reported at lower rates: strategies to improve these should be considered. Strength of this review is the inclusion of papers from 10 countries, and the detailed analysis of study measures from HP and women's viewpoints, limited by few studies in each category, and high heterogeneity.

**Registration** PROSPERO 2015:CRD42015029989.

### **Strengths and limitations of this study**

- To our knowledge, this is the first systematic review to comprehensively analyse empirical data on health providers implementation of the 5As by analysing like measures for SCC, and the only review, as far as we are aware, to perform a meta-analysis and meta-regression.
- Fifty four studies were included from 7 high-income and three low to middle income countries and includes health providers from disciplines of medicine, nursing, and allied health.
- The review was limited by not being able to determine the cause for the high heterogeneity in the meta-analyses by our meta-regression, except for 'Arrange referral-often/always' which was related to year, and country: this suggests a cautious interpretation.

- The quality rating revealed aspects of some papers were poor; findings from these studies may be less reliable.
- Our review aids in determining which components of SCC are unreliably implemented to guide strategies to improve SCC in pregnancy.

**Keywords:** smoking, health care providers, smoking cessation, maternal health, pregnancy

**Word count:** 4724

## Introduction

Smoking during pregnancy carries high risks for mother and child, including obstetric complications for the mother,<sup>1</sup> and for the baby, premature birth, growth restriction, low birth weight, still-birth, and congenital defects.<sup>1</sup> Longer-term effects on the child include respiratory illnesses, learning and behavioral problems, childhood cancer, and increased risks of chronic diseases,<sup>1</sup> and of taking up smoking in adolescence.<sup>2</sup>

Smoking during pregnancy remains a prevalent behaviour in many countries, with estimated smoking prevalence rates ranging from 0.2% to 38.4%.<sup>3</sup> Pregnancy is a time when women are more likely to be motivated to stop smoking.<sup>4</sup> However, disadvantaged women, including women from minority and Indigenous populations where there is a high prevalence of community smoking, also smoke at higher rates and are less likely to try to stop smoking, or succeed.<sup>5,6</sup> Also, less likely to stop smoking are women who are: of low socio-economic status,<sup>5</sup> multi-parous,<sup>5</sup> adolescents,<sup>7</sup> partnered by smokers,<sup>5</sup> and those experiencing: alcohol or substance use,<sup>7</sup> depression,<sup>8</sup> life stressors,<sup>9,10</sup> or intimate partner violence.<sup>11</sup> Women frequently reduce tobacco consumption when discovering they are pregnant,<sup>10,12</sup> indicating a consciousness about the risks, but may be less likely to abstain.<sup>13</sup> Pregnant women report a lack of support for smoking cessation, and that health providers (HP) consider cutting down to be acceptable.<sup>14,15</sup>

HPs in primary care have a critical role to offer advice and support women to stop smoking during pregnancy.<sup>16</sup> Ideally smoking cessation care (SCC) includes counselling and pharmacotherapy – most successful when combined.<sup>16,17</sup> In pregnancy, the effective use of pharmacotherapy is less certain, and clinical guidelines vary across and within different

1  
2  
3 countries.<sup>16</sup> In pregnancy, only nicotine replacement therapy (NRT) is recommended, but not  
4 consistently advised for use in pregnancy in all countries,<sup>16,18</sup> for example NRT is not advised  
5 in the USA for use in pregnancy,<sup>19</sup> but it is more routinely prescribed in the UK.<sup>20</sup> Clinical  
6 guidelines in the UK, Australia, New Zealand and Canada recommend that a woman should  
7 initially endeavour to quit without medication, but if she cannot, NRT can be prescribed.<sup>16 21-</sup>  
8  
9  
10  
11  
12  
13  
14  
15  
16  
17  
18  
19  
20  
21  
22  
23  
24  
25  
26  
27  
28  
29  
30  
31  
32  
33  
34  
35  
36  
37  
38  
39  
40  
41  
42  
43  
44  
45  
46  
47  
48  
49  
50  
51  
52  
53  
54  
55  
56  
57  
58  
59  
60

The 5As ('Ask (about smoking)', 'Advise (to quit)', 'Assess (motivation and/or dependence)', 'Assist (with cessation)', and 'Arrange (follow-up or referral)') has been adopted in many countries as a strategy for HPs to deliver all the important components of SCC.<sup>25</sup> Several studies have examined the performance of the 5As in pregnancy. Two reviews summarised the literature. Okoli et al's integrative review reported on HP performance of components of the 5As. While authors reported more than 50% of HPs Ask and Advise about smoking, and less than 50% Assess, Assist or Arrange (referral or follow-up), it is unclear how these estimates were calculated. This is an important limitation considering the variable ways studies collect data and report them.<sup>26</sup> Baxter et al's qualitative systematic review, on the factors that influenced uptake of interventions by pregnant women, included studies on HP and women's reports of their receipt of SCC, and noted variation between HPs for recording smoking status and advice.<sup>27</sup> As neither review included a meta-analysis, it is timely and important from the point of view of rigour to have a definitive evaluation of HP practices, and furthermore to accurately inform recommendations to guide strategies to improve SCC. An urgent need for research to increase the uptake of smoking cessation interventions, and improve quit rates in pregnant women who smoke has been identified by Siddiqi and Mdege<sup>28</sup>



1  
2  
3 The objective of this systematic review was to summarise published empirical research of  
4 eligible studies from a range of HPs who consult with pregnant women who smoke, and  
5 synthesise findings with meta-analyses where feasible. The primary aim was to determine the  
6 prevalence of the components of SCC that were being practiced, including the 5As,  
7 prescribing NRT, and related behaviour change techniques (BCTs - observable and replicable  
8 components designed to change behaviour),<sup>29</sup> thus determine which aspects of SCC need  
9 improvement. A second aim was to examine which factors were associated with delivery of  
10 the 5As, and NRT prescribing i.e., HP types, country, year, and pregnant women in high-risk  
11 populations. We also examined data about knowledge and attitudes of the HPs to inform their  
12 practices.  
13  
14  
15  
16  
17  
18  
19  
20  
21  
22  
23  
24  
25

## 26 **Methods**

27  
28  
29  
30  
31 Data were identified by searches of MEDLINE, EMBASE, CINAHL and PsycINFO, and  
32 reference lists from relevant articles. Where possible, search terms were matched to MESH  
33 or database specific subject headings, and used as keywords. Search terms included  
34 (Supplementary File Table A): pregnancy (e.g., perinatal care, mother), smoking (e.g.,  
35 nicotine dependence, smoking cessation), health professional (e.g., general practitioner,  
36 midwife), and attitudes or practices (e.g., capacity, belief). Searches were performed in  
37 September 2015; additional studies included until June 2017.  
38  
39  
40  
41  
42  
43  
44  
45  
46  
47

48 Inclusion criteria: peer-reviewed full papers on SCC to pregnant smokers by any HP in  
49 any setting, restricted to English language, with no date restrictions. Quantitative  
50 studies and/or quantitative data from mixed methods studies with any study design  
51 were included, comprising self-reported provision of SCC by HPs, reported receipt of  
52  
53  
54  
55  
56  
57  
58  
59  
60

1  
2  
3 SCC by pregnant women, or other indicators e.g., chart audit or audio-recordings of  
4 consultations. For this review, SCC was based on the 5As: asking about smoking,  
5  
6 advising about quitting, assessing motivation to stop smoking or nicotine dependence,  
7  
8 assisting to quit, and arranging follow up or referral.<sup>25</sup> In addition, we included papers  
9  
10 reporting HP knowledge, attitudes, and other practices e.g., advising about relapse and  
11  
12 smoke-free homes, discussing psychosocial contexts of smoking, involving family  
13  
14 members or partners, prescribing NRT, and other BCTs (e.g., setting a quit date,  
15  
16 making a quit plan, resources and self-help materials, and monitoring carbon monoxide  
17  
18 readings).<sup>30</sup> Exclusion criteria: intervention studies and studies in non-peer-reviewed  
19  
20 literature; studies on pre-conceptual and post-natal care. Additionally, 10 papers that  
21  
22 did not have a main focus on the review topic and/or reported minimal data about the  
23  
24 topic such as one line or one data item in a full paper, were excluded (list available  
25  
26 from authors on request). The review was registered with PROSPERO 2015:  
27  
28 CRD42015029989. We used the MOOSE checklist when writing our report.<sup>31</sup>  
29  
30  
31  
32  
33  
34

35 Two researchers (LT – behavioural scientist, YB - physician) independently screened titles,  
36  
37 abstracts, and then full papers and applied the inclusion criteria to determine eligibility.  
38  
39 Discrepancies were resolved by consensus, with a third researcher (GSG) acting as  
40  
41 adjudicator, when agreement was not reached. Studies that met all criteria were retained for  
42  
43 full review. One researcher completed data extraction (LS) with a second (YB) extracting  
44  
45 20% of articles, then results compared. A summary table (Supplementary File Table B) was  
46  
47 developed from this data (GRG, GSG). The characteristics of each study were examined  
48  
49 including aims, setting, country, sample characteristics, study focus (HP or women), HP type,  
50  
51 study design and method, measures, extracted results for each of the 5As, and prescription of  
52  
53 NRT.  
54  
55  
56  
57  
58  
59  
60

1  
2  
3  
4  
5 As the studies overall were of all types of design, a quality assessment of the quantitative and  
6  
7 mixed studies was carried out using Hawker et al's tool for reviewing disparate data  
8  
9 systematically.<sup>32</sup> This was chosen in the absence on any consensus on the best tool, as we  
10  
11 were including quantitative and mixed method studies in the review. LS rated all studies  
12  
13 using the tool (20% double-rated by YB). Studies were included irrespective of quality.  
14  
15

16  
17  
18 Quantitative data were presented as percentages and counts were possible, and meta-analyses  
19  
20 made for estimates of each of the 5As of SCC provision, and prescribing NRT. A narrative  
21  
22 analysis summarises other studies or outcomes. For each outcome measure we looked at the  
23  
24 specific measurements across studies to determine whether it was clinically appropriate to  
25  
26 group them together i.e., Ask, Advise, Assess (motivation to quit, nicotine dependence),  
27  
28 Assist (cessation support, quit date, quit plan, prescribe NRT), Arrange (follow up, referral).  
29  
30 To achieve this, we considered both the data collection method (cross-sectional survey; audit  
31  
32 of patients' medical records; audio-recording of consultation; women's report through survey  
33  
34 or interview) and the measure itself that was used (e.g., Likert scale, or a dichotomous  
35  
36 Yes/No response, and so forth). General principles applied were:  
37  
38  
39  
40  
41

- 42 • **'Often/Always'** included survey measures reflecting asking 'often' and 'always',  
43 'usually and always'; and/or 'most of the time' and 'all of the time'). The combined  
44 answers in Likert scales were dichotomised for analysis.  
45  
46
- 47 • **'Always/all'** included in this analysis was the proportion of HPs answering 'always'  
48 or 'all of the time', if a Likert scale was used, or the proportion answering 'Yes' if a  
49 dichotomous question was used: either asking 'do you ask all of your patients?' or 'do  
50  
51  
52  
53  
54  
55  
56  
57  
58  
59  
60

1  
2  
3 you ask your patients always?' Answers reporting on 'Asking' more than 75% of their  
4 patients were considered as 'Yes' for these analyses.

- 5  
6  
7 • 'Yes' where a survey asked the HP a dichotomous question for example 'Do you  
8 advise? Yes/No' were grouped separately as "Advise - Yes"

9  
10  
11  
12  
13  
14 All statistical analyses were programmed using Stata v13.1 (StataCorp LP, College Station,  
15 TX, USA). Meta-analyses were performed to examine the performance of each of the 5As,  
16 including prescribing NRT, as above. Stata program *Metaprop* was used to pool  
17 dichotomized responses for each of the 5As. If more than 5 studies were pooled, random  
18 effects modelling (DerSimonian and Laird's method) was used to account for differences in  
19 underlying estimates due to study population and design; heterogeneity ( $I^2$ ) was measured for  
20 each reporting type. If the number of studies was low ( $\leq 5$ ), fixed effects modelling was used  
21 as there was not enough power to model the heterogeneity as having an underlying random  
22 distribution; heterogeneity is not presented. Where required, in order to include studies where  
23 the percent reporting the outcome was 100%, the Freeman-Tukey Double Arcsine  
24 Transformation method was used to stabilize the variances prior to pooling. Pooled estimates  
25 for study outcomes were split by response, and also by HP type. Significance was set as  
26  $\alpha=0.05$  a priori.

27  
28  
29  
30  
31  
32  
33  
34  
35  
36  
37  
38  
39  
40  
41  
42  
43  
44 For the 'often/always' responses to Ask, Advise, Assist, Arrange, including prescribing NRT,  
45 meta-regression (Stata program *Metareg*) was used to examine whether some of the  
46 heterogeneity seen in the proportions reported for each study could be explained by HP type  
47 (e.g. midwife, general practitioners (GP), obstetricians (OBS), or mixed groups of HPs),  
48 high-risk population versus not (e.g., women in low socio-economic groups, Indigenous  
49 women, or with mental health diagnoses), country (USA, Europe, Australia/New Zealand, or  
50  
51  
52  
53  
54  
55  
56  
57  
58  
59  
60

1  
2  
3 Other), or year of publication (1990-2017). P-value, changes in heterogeneity ( $I^2$  residual),  
4 changes in between study variance ( $\tau^2$ ), and proportion of between-study variance explained  
5 by predictor (adjusted  $R^2$ ) were reported. For year, the linearity of proportion over time was  
6 examined, and if a non-linear trend was seen then the meta-regression was not performed.  
7  
8  
9  
10

11  
12  
13 An analysis of agreement of quality-rating coders was performed. Weighted kappa  
14 (ordinal multi-rater - quadratic weighted Kappa) was used to compare the rating of 9  
15 quality study criteria for 15 studies; each criteria was scored on a 5 point scale (Very  
16 poor, Poor, Fair, Good, Very Good). Mean (SD) ratings were calculated for each  
17 criteria for each rater. Kappa and weighted kappa estimates were interpreted using cut-  
18 off criteria specified by Altman.<sup>33</sup> Strength of agreement was < 0.20 Poor; 0.21 - 0.40  
19 Fair; 0.41 - 0.60 Moderate; 0.61 - 0.80 Good; 0.81 - 1.00 Very Good.  
20  
21  
22  
23  
24  
25  
26  
27  
28  
29  
30

## 31 Results

32  
33  
34  
35  
36 Of the 3933 studies found, 54 papers met the inclusion criteria for quantitative review. See  
37 Prisma Flow Chart for included studies (Figure 1).  
38  
39  
40  
41

42  
43 A total of 54 studies were included in this analysis.<sup>34-87</sup> Study details including author,  
44 country, study focus (HP, women, or both), population and risk category (high/low), study  
45 aims, inclusion of 5As, and summary of results are presented in Supplementary File Table B.  
46  
47 Of these studies, approximately 90% were quantitative ( $n = 49$ ),<sup>34-40,42,45-61,63-72,74-87</sup> and  
48 approximately 10% ( $n = 5$ ) utilized mixed methods, containing both quantitative and  
49 qualitative aspects.<sup>41,43,44,62,73</sup> The included studies used the following study methods: survey  
50  
51  
52  
53  
54  
55  
56  
57  
58  
59  
60

( $n = 48$ ),<sup>34-42,45-59,61-64,66-78,81-87</sup> audio-recordings ( $n = 2$ ),<sup>43,44</sup> audit ( $n = 2$ ),<sup>79,80</sup> audit with interview ( $n = 1$ ),<sup>60</sup> and observational ( $n = 1$ ).<sup>65</sup>

Study location included seven high income countries (United States of America,<sup>34,42,46,51,54-56,58,62,68,75,76,83</sup> United Kingdom,<sup>41,45,49,57,71</sup> Australia,<sup>37,48,72,73,84,87</sup> Germany,<sup>78,81</sup> Switzerland,<sup>63</sup> New Zealand,<sup>52,53,77</sup> France,<sup>46</sup>) and three low to middle income countries (Jordan, Argentina, and Uruguay).<sup>28,32,59</sup>

Included studies focused on either HPs ( $n = 39$ , 72%),<sup>34,35,37,38,40,41,44-52,54-58,62,63,65-70,72,75-78,80,81,84-87</sup> pregnant women ( $n = 12$ , 22%),<sup>36,39,42,53,59,60,64,71,73,79,82,83</sup> or both HPs and pregnant women ( $n = 3$ , 6%).<sup>43,61,74</sup> Studies encompassing HPs included obstetricians and gynaecologists (OBS) ( $n = 9$ , 21%),<sup>35,46,50,51,54,62,68,70,76</sup> midwives ( $n = 7$ , 17%),<sup>34,38,48,49,61,69,81</sup> general practitioners (GPs) ( $n = 3$ , 7%),<sup>57,58,65</sup> multiple professions (e.g., OBS, GPs, nurses, healthcare assistants;  $n = 21$ , 50%),<sup>37,40,41,43-45,47,52,55,56,63,66,67,72,74,76-78,84,86,87</sup> or did not report the profession ( $n = 1$ , 2%).<sup>80</sup>

Out of the 54 papers, information on Ask, Advise, Assess, Assist and Arrange (follow up/referral) was reported by approximately 68%, 70%, 28%, 63%, and 54% of studies, respectively. Few studies addressed all of the 5As combined ( $n=12$ , 22%). These reported that HPs rarely addressed all of the 5As, e.g. only 19.6% of respondents in Bar-Zeev et al's study of GPs and OBS performed all of the 5As 'often/always'.<sup>37</sup>

Only four studies (7%) addressed the provision of other BCTs in pregnancy. In one study, 31% of OBS advised women to set a quit date;<sup>35</sup> in a second study 29% of midwives suggesting quitting with an acquaintance;<sup>49</sup> 97% of women in a third sample reported they had not had their exhaled carbon monoxide tested,<sup>53</sup> and a fourth study reported which clinics used open-ended questions and problem solving.<sup>86</sup> Additionally, some studies ( $n=12$ , 22%),

1  
2  
3 obtained information on or addressed a woman's psychosocial context for smoking e.g.,  
4 family or partner's smoking status or involvement in quitting, a woman's social support, or  
5 her living environment e.g., a smoke free home or vehicle ( $n=3$ , 6%). Information regarding  
6 the use of resources was addressed in 20 studies (37%), i.e., providing pamphlets or  
7 recommending online programs. Advise about relapse was rarely addressed in the included  
8 literature ( $n=3$ , 6%); e.g. in one of the studies midwives reported they discussed with women  
9 how to avoid relapse.<sup>49</sup>

10  
11  
12  
13  
14  
15  
16  
17  
18 Twenty-nine papers of the 54 papers addressed NRT in some capacity. These included  
19 knowledge and training, attitudes to NRT, and prescribing of NRT. Papers addressing  
20 knowledge, attitudes and training in general ( $n=14$ , 26%) also reported on HP knowledge  
21 about whether NRT can be used in pregnancy, and HP confidence about their smoking  
22 cessation knowledge, awareness of smoking cessation guidelines, knowledge about the  
23 consequences of smoking for expectant mothers, and risks to their baby. The majority of HPs  
24 believed maternal smoking to be harmful to the fetus and/or the woman, with reports ranging  
25 from 90-100%. General knowledge about smoking in pregnancy varied (e.g., in Bonollo et  
26 al,<sup>40</sup> only 44-52% of US HPs of various types, had correct knowledge). In Mejia et al's study  
27 75% of Argentinian physicians believed it was safe to smoke up to six cigarettes when  
28 pregnant.<sup>66</sup>

29  
30  
31  
32  
33  
34  
35  
36  
37  
38  
39  
40  
41  
42  
43 In addition, the above group of studies included aspects of smoking cessation training (i.e.,  
44 whether training had been offered, engaged in, and if more training was needed). In general,  
45 HPs reported they had received limited training on smoking cessation care in pregnancy, and  
46 identified that they required more training.

47  
48  
49  
50  
51  
52  
53  
54  
55  
56  
57  
58  
59  
60  
Papers including information on NRT prescribing ( $n=14$ , 26%) reported on the frequency of  
considering to prescribe NRT, the frequency of recommendation of NRT, frequency of

1  
2  
3 prescribing NRT, percentage of NRT scripts filled by women, percentage following FDA  
4 NRT prescription recommendations, and the different NRT types prescribed (e.g., patches,  
5 gum, or inhalators). Overall findings suggested that HPs more often than not chose to not  
6  
7 prescribe NRT to pregnant women who smoke, this was also supported by the meta-analysis  
8  
9 below.  
10  
11

12  
13  
14 Attitudes and knowledge was associated with HP practices. In one Australian study, higher  
15 levels of knowledge about NRT were associated with greater likelihood of assessing  
16 women's smoking status.<sup>72</sup> In another US study, OBS who perceived NRT as safe to use in  
17 pregnancy were 20 times more likely to prescribe NRT.<sup>75</sup> An Australian study determined  
18 that HP optimism, and confidence in counselling and/or prescribing NRT, and having  
19 sufficient time and resources were associated with a higher performance of all the 5As.<sup>37</sup>  
20  
21

22  
23 Thirty-three studies were suitable for meta-analysis.<sup>34,35,39,41,42,45,46,48,49,51-55,57,58,62,63,66,68,71-  
24  
25 73,75,77,78,81,84,87,88</sup> Seventeen meta-analyses were performed and associated forest plots  
26  
27 constructed (see Supplementary File Figures A to Q). Figure 2 provides a visual comparison  
28  
29 for pooled percentages of selected categories of 'often/always'.  
30  
31

32  
33 Overall the performance of 'Ask – often/always' ( $n=9$ ) was 91.6% (95% CI 88.2%, 95%).  
34  
35 Percentages for 'Ask – 'always/all'' ( $n=11$ ) was similar at 91.5% (95%CI 85%, 96.3%).  
36  
37 Percentages for 'Ask –Yes' ( $n=4$ , all by womens report) was slightly higher at 93.6% (95%CI  
38  
39 92.6%, 94.6%).  
40  
41

42  
43 The performance of 'Advise – often/always' ( $n = 7$ ) was 90% overall (95%CI 72.5%,  
44  
45 99.3%). Percentages for 'Advise – always/all' ( $n = 6$ ) was 86.4% overall (95%CI 79.6%,  
46  
47 93.3%). Percentages for 'Advise – Yes' (HP report) ( $n = 4$ ) was much lower at 58.1% overall  
48  
49 (95%CI 55.9%, 60.4%). Percentages for 'Advise – women's report Yes' ( $n = 4$ ) was similar  
50  
51  
52  
53  
54  
55  
56  
57  
58  
59  
60



1  
2  
3 at 53.6% overall (95%CI 52.6%, 54.6%). Percentages for ‘Assess motivation to quit –  
4 often/always’ ( $n = 3$ ) was 79.2% overall (95%CI 76.5%, 81.8%).  
5  
6  
7

8  
9 Overall 34 manuscripts included a question about assisting. Some were generally asked about  
10 assisting the patient to quit, others specified a method of assisting such as counselling, setting  
11 a quit date, making a quit plan, and prescribing NRT. Those in the meta-analysis were as  
12 follows: ‘Assist cessation support – often/always’ ( $n = 5$ ) was 59.1% (95%CI 56%, 62.2%);  
13 ‘Assist counselling – yes’ ( $n = 5$ ) was higher at 80.7% (95%CI 79%, 82.5%); ‘Assist quit  
14 plan – often/always’ ( $n = 2$ ) was 57.6% (95%CI 54.1%, 61.1%); ‘Assist quit date –  
15 often/always’ ( $n = 3$ ) was low at 29% (95%CI 25.3%, 32.7%); ‘Assist – women’s report Yes’  
16 ( $n = 4$ ) was the lowest at 26.8% (95%CI 25.3%, 28.3%). The performance of ‘Arrange referral  
17 – often/always’ ( $n = 6$ ) was 33.3% overall (95%CI 20.4%, 46.2%). There was no analysable  
18 data on women’s report for ‘Arrange’.  
19  
20  
21  
22  
23  
24  
25  
26  
27  
28  
29  
30  
31  
32

33 ‘Prescribing NRT – Yes’ was 25.4% ( $n = 6$ ) overall (95%CI 12.8%, 38%). ‘Prescribing NRT –  
34 often/always’ ( $n = 4$ ) however was very low at 12.8% overall (95%CI 10.7%, 15%). The  
35 performance of ‘Prescribing NRT – always’ ( $n = 4$ ) was the lowest at 6.2% overall (95%CI  
36 4.9%, 7.4%). There was no analysable data on women’s report of having been prescribed  
37 NRT.  
38  
39  
40  
41  
42  
43  
44  
45

46 High heterogeneity ( $I^2 = 95.9 - 99.1\%$ ) was seen for: ‘Ask – often/always’; ‘Ask – always’;  
47 ‘Advise – often/always’; ‘NRT prescription’; ‘Arrange referral – often/always’; thus  
48 indicating considerable diversity in study outcomes, methodology, or populations. A fixed  
49 effects model was used for the following outcomes due to low number of studies, and  
50 heterogeneity was not measured: ‘Ask – women’s report Yes’; ‘Advise – Yes’; ‘Assess  
51  
52  
53  
54  
55  
56  
57  
58  
59  
60

1  
2  
3 motivation to quit – often/always’; all the ‘Assist’ categories; ‘NRT Prescription – always’,  
4  
5 ‘NRT Prescription – often/always’.  
6  
7  
8

9 Table 1 displays the results of the meta-regression of the ‘often/always’ categories of ‘Ask’,  
10  
11 ‘Advise’, ‘Arrange’, and ‘Prescribing NRT’ from the meta-analysis. ‘Assist’ only had 5  
12  
13 studies, so the meta-regression was not performed. For nearly all of the measures, none of the  
14  
15 predictors examined significantly explained the heterogeneity of the proportions for the  
16  
17 studies. For ‘Arrange referral –often/always’, country was found to explain some of the  
18  
19 differences in proportion of HPs providing this type of smoking cessation care; with  
20  
21 Australian and New Zealand studies having significantly higher proportions of HPs reporting  
22  
23 ‘Arrange referral – often/always’ than USA studies (on average). Year was also found to  
24  
25 explain some of the differences in proportion with later years having higher proportions of  
26  
27 HP reporting this ‘Arrange referral- often or always’ (on average).  
28  
29  
30  
31  
32

33 Table 2 shows the quality rating with the Hawker et al tool,<sup>32</sup> for included studies. Over 70%  
34  
35 of the studies had some aspects at least that were rated as good.  
36  
37  
38

39 Table 3 shows the ratings, and level of agreement from using the Hawker tool,<sup>32</sup> for the 15  
40  
41 papers that were rated independently by two raters. Coder agreement varied from Poor for  
42  
43 two criteria, Fair for four of the criteria, and Moderate for three criteria.  
44  
45  
46  
47

## 48 **Discussion**

49  
50  
51

52 This systematic review of 54 studies from 10 countries on a range of HPs who consult with  
53  
54 pregnant women who smoke. Thirty-three studies were suitable for meta-analyses for at least  
55  
56  
57  
58  
59  
60

1  
2  
3 one outcome measure. Studies displayed considerable variation in the way they assessed HP  
4 provision of each of the 5As. Commonly surveys employed Likert scales that were re-  
5 categorised as ‘often or always’, or questions forcing a ‘Yes/No’ option. We pragmatically  
6 transformed outcome measures so they could be combined for meta-analysis, over the 5As  
7 and their subcategories, resulting in small numbers of studies in each forest plot.  
8  
9  
10  
11  
12

13  
14  
15 The primary aim to determine the prevalence of the components of SCC that were being  
16 practiced by a range of HPs. The review demonstrated several aspects of SCC that could be  
17 improved for pregnant women, including those seen in primary care settings. The highest  
18 rates were for Ask and Advise, and Assess. Assist and Arrange were consistently lower. Our  
19 secondary aim to examine whether SCC differed between different HP types, for pregnant  
20 women in high-risk populations, by country, and by year was achieved by meta-regressions  
21 of studies reporting practices ‘often/always’. Only ‘Arrange referral’ had a significant result,  
22 indicating that year and country could explain some of the heterogeneity, and perhaps  
23 indicating an increased awareness of referral options in later years, or in Australia and New  
24 Zealand. The 21 studies not included in the meta-analysis, revealed few comparable  
25 quantitative studies on HP knowledge, attitudes and the lesser reported practices of BCTs,  
26 and the implementation of all components of the 5As together. On the whole HP knowledge  
27 base might be insufficient about NRT. Poor understanding about the safety or efficacy of  
28 NRT in pregnancy compared to continued smoking may lead to under-prescribing of NRT as  
29 a stop smoking aid, however this is likely to be context sensitive as not all countries  
30 recommend the use of NRT and clinical guidelines vary across time and even within the same  
31 country.<sup>16</sup> Access to HP training for SCC was reported as being limited, and HPs indicated  
32 they required more training.  
33  
34  
35  
36  
37  
38  
39  
40  
41  
42  
43  
44  
45  
46  
47  
48  
49  
50  
51  
52  
53  
54  
55  
56  
57  
58  
59  
60

1  
2  
3 The strength of this study is that, as far as we are aware, it is the broadest and most rigorous  
4 systematic review of HP performance of the 5As in pregnancy, including 7 high-income and  
5 three low to middle income countries and the only review, to our knowledge, to perform a  
6 meta-analysis and meta-regression. We took care to combine outcome measures with like  
7 measures, for each of the 5As, wherever possible. Multiple meta-analyses were performed,  
8 for each combined measure. The high heterogeneity suggests a cautious interpretation of the  
9 results. The review was limited by not being able to determine the cause for the high  
10 heterogeneity in the meta-analyses by our meta-regression, except for 'Arrange referral-  
11 often/always' which was related to year, and country. The quality rating revealed aspects of  
12 some papers were poor; findings from these studies may be less reliable. However  
13 discrepancies between the raters indicate a circumspect interpretation.  
14  
15  
16  
17  
18  
19  
20  
21  
22  
23  
24  
25  
26  
27

28 Two other reviews examined the provision by HP of SCC for pregnant women. Okoli et al's  
29 non-systematic review included 28 studies from 6 high-income countries (USA, Australia,  
30 UK, Germany, Canada, and the Netherlands).<sup>26</sup> The review reported that few HPs working  
31 with pregnant women use all the components of the 5As. Although more than 50% of HPs in  
32 the review asked women about their smoking status and advised pregnant smokers to quit,  
33 fewer than 50% assessed motivation, assisted smoking cessation, or arranged follow-up or  
34 referrals. Our review highlighted the diversity of the ways different studies surveyed HPs  
35 about their use of the 5As, but it is unclear from the Okoli review how these estimates were  
36 made. Instead a range was reported for each of the 5As, (for example 'Ask' 73-100%;  
37 'Assess' readiness or willingness to make a quit attempt 42-81%) without the reader being  
38 able to determine which studies used Likert scales, if measures were re-categorised, or a  
39 dichotomous Yes/No employed. Baxter et al's systematic review included 23 papers from 6  
40 high-income countries, one middle-income country (UK, France, Sweden, USA, Australia,  
41  
42  
43  
44  
45  
46  
47  
48  
49  
50  
51  
52  
53  
54  
55  
56  
57  
58  
59  
60

1  
2  
3 NZ, South Africa) and one multi-nation study, in a qualitative synthesis.<sup>27</sup> Similarly, although  
4  
5 Baxter's review reports percentages of HP or women giving or receiving different aspects of  
6  
7 the 5As, they do not describe how these questions were asked.<sup>27</sup>  
8

9  
10 The low rates of reported implementation of components of the 5As may be related to  
11  
12 barriers at several levels. Okoli et al's review suggests several important provider-specific,  
13  
14 patient-specific, and system or organizational barriers hindering the provision of SCC by  
15  
16 HP.<sup>26</sup> Provider-specific barriers centred around HP self-efficacy or perceived ability to  
17  
18 provide SCC to pregnant smokers, namely low knowledge, low confidence for counselling  
19  
20 and use of NRT, the perception that as HPs they could not influence the patient's smoking  
21  
22 behaviour, or that SCC was not their role. In the studies in our review, HP practices also  
23  
24 related to HP knowledge and attitudes (optimism and confidence). Patient-level barriers  
25  
26 included HP perceptions that pregnant smokers were not interested in quitting, had stressful  
27  
28 lives, and HPs not wanting to jeopardise their relationship with the pregnant patient by  
29  
30 raising smoking as an issue. System-level barriers included lack of time, resources, training  
31  
32 and protocols, similarly described in our review. Baxter et al's review also reports barriers to  
33  
34 providing SCC: discussing smoking cessation depended on whether HPs were able to broach  
35  
36 the subject, staff confidence and perception of effectiveness, manner of communication,  
37  
38 whether follow-up occurred, time and resource constraints, and service protocols.<sup>27</sup>  
39  
40  
41  
42  
43

44  
45 One of the included Australian studies explained some of the factors that may impinge on the  
46  
47 quality of SCC for pregnant women. Bar-Zeev et al analysed the factors associated with  
48  
49 performance of the 5As, and provision of NRT in Australian medical practitioners.<sup>37</sup> In a  
50  
51 national study of 378 GPs and OBS, 'internal influences' (including HP confidence for  
52  
53 counselling and prescribing NRT, optimism, sufficient time and resources) were associated  
54  
55 with a higher likelihood of performing the 5As, whereas 'external influences' (i.e., workplace  
56  
57  
58  
59  
60

1  
2  
3 routines, doctor-patient relationship, comfort raising the issue, perceived priority) were  
4 associated with performing the shorter version of Ask, Advise, Refer (AAR).<sup>37,89,90</sup>  
5  
6 Furthermore, being an OBS compared to being a GP, low confidence, and uncertainty about  
7 safety of NRT, were associated with lower odds of prescribing NRT.<sup>88</sup>  
8  
9  
10

11  
12  
13 Our objective to determine which aspects of SCC for pregnant women could need  
14 improvement, revealed on the whole that ‘Assist’ and Arrange’ were less performed.  
15  
16 Assisting pregnant smokers to quit is a vital priority. Unless there are high-quality specialised  
17 services to refer pregnant smokers to, it is insufficient for HPs to raise the issue, advise, and  
18 assess, without going further to actually assist a quit attempt, and as a duty of care arrange  
19 follow up or referral. Psychosocial support coupled with NRT (if needed, available and  
20 approved) may give pregnant women the best chance of quitting.<sup>16,91</sup> Various implementation  
21 strategies could be considered to improve SCC delivery to pregnant women, which may  
22 include HP education and training, promotion of clinical practice guidelines, audit and  
23 feedback, reminders, opinion leaders, incentives, or supervision.<sup>92</sup> Training was reported as  
24 an educational need by the HPs in the studies, and worthy of consideration. Training should  
25 most urgently focus on the elements of the 5As that are seldom performed, taking into  
26 account country-specific needs and guidelines. Training should provide actual skills to HPs in  
27 how to assist smokers to quit, and give opportunities to practice and receive feedback on their  
28 performance. Evidence-based updates on the use of NRT in pregnancy may be warranted  
29 especially if professional college guidelines are not up-to-date, with a caution about  
30 jurisdictions that may deter prescribing or access.<sup>16</sup>  
31  
32  
33  
34  
35  
36  
37  
38  
39  
40  
41  
42  
43  
44  
45  
46  
47  
48  
49  
50

51  
52 Providing access to resources, such as educational and training materials for HPs, evidence-  
53 based and culturally-appropriate patient information sources, and affordable NRT, will  
54  
55  
56  
57  
58  
59  
60

1  
2  
3 demand changes to policy in some settings and countries. Time is a perennial problem for  
4  
5 HPs, however changes in practice protocols, and a whole-of-service approach, could support  
6  
7 pregnant women to receive the time investment warranted by such an important issue for  
8  
9 their own and their baby's health. Additionally, policy changes to provide accessible and  
10  
11 culturally-appropriate referral options are critical. Further research is warranted to understand  
12  
13 which interventions can successfully improve HP performance of the 5As, and whether other  
14  
15 models, such as the AAR,<sup>92</sup> the ABC (Ask, Brief Advice, Cessation),<sup>93</sup> or ABCD (Ask, Brief  
16  
17 Advice, Cessation, Discuss)<sup>94</sup> approach may better facilitate HP implementation of SCC, and  
18  
19 correspondingly improve quit rates in pregnant women. Standardised methods to assess the  
20  
21 provision of SCC and the 5As in research or program evaluations, would aid future  
22  
23 comparisons.  
24  
25  
26  
27

## 28 **Conclusions**

29  
30  
31  
32  
33 In a systematic review of HPs' provision of SCC for pregnant women in 10 countries, meta-  
34  
35 analyses were performed after combining like measures across studies where feasible. Pooled  
36  
37 percentages revealed that HPs reliably 'Ask', 'Advise' and 'Assess' pregnant women about  
38  
39 tobacco smoking. 'Assist', including assist by 'prescribing NRT', and 'Arrange referral' were  
40  
41 much lower, and may be improved by appropriate interventions such as training, incentives  
42  
43 or prompts. Meta-regressions were significant only for 'Arrange referral' for year and  
44  
45 country. Further research may be required to understand other factors driving the  
46  
47 heterogeneity between different studies. Standardised methods to assess the provision of SCC  
48  
49 and the 5As are warranted.  
50  
51  
52  
53  
54  
55  
56  
57  
58  
59  
60

1  
2  
3 Author Statement: GSG was responsible for the design of the review, publishing the protocol  
4 in PROSPERO, oversaw all aspects of the study and wrote the manuscript. LT conducted the  
5 searches with YB. LS did the data extraction, and with YB the quality analysis. KP  
6 conducted the meta-analyses and meta-regressions. GRG assisted GSG in writing the  
7 methods and results sections, and preparing tables. BB advised on study design and critically  
8 reviewed the manuscript. YBZ advised on manuscript drafts as senior author. All authors  
9 reviewed and approved the final manuscript.  
10  
11  
12  
13  
14  
15  
16  
17  
18  
19

#### 20 Declaration of interests

21  
22 GSG reports grants from National Health and Medical Research Council, grants from Cancer  
23 Institute New South Wales, grants from Hunter Cancer Research Alliance, during the  
24 conduct of the study; grants from National Health and Medical Research Council, grants  
25 from Hunter New England Central Coast Primary Health Network, grants from Cancer  
26 Australia and Cure Cancer Australia , grants from Ministry of Health NSW , grants from  
27 John Hunter Hospital Charitable Trust, outside the submitted work. YB reports grants and  
28 others from Hunter Cancer Research Alliance, during the conduct of the study; personal fees  
29 from Novartis NCH, personal fees from Pfizer Israel LTD, outside the submitted work. No  
30 other authors declare a conflict of interest.  
31  
32  
33  
34  
35  
36  
37  
38  
39  
40  
41  
42  
43

44 Data Statement: No further data is available  
45  
46  
47

48 Acknowledgements: This study was funded by a grant from Hunter Cancer Research  
49 Alliance, Australia. The funder of the study had no role in study design, data collection, data  
50 analysis, data interpretation, or writing of the report. The corresponding author had full  
51  
52  
53  
54  
55  
56  
57  
58  
59  
60



1  
2  
3  
4  
5  
6  
7  
8  
9  
10  
11  
12  
13  
14  
15  
16  
17  
18  
19  
20  
21  
22  
23  
24  
25  
26  
27  
28  
29  
30  
31  
32  
33  
34  
35  
36  
37  
38  
39  
40  
41  
42  
43  
44  
45  
46  
47  
48  
49  
50  
51  
52  
53  
54  
55  
56  
57  
58  
59  
60

access to all the data in the study and had final responsibility for the decision to submit for publication.

For peer review only

## References

1. Hofhuis W, De Jongste J, Merkus P. Adverse health effects of prenatal and postnatal tobacco smoke exposure on children. *Archives of disease in childhood* 2003; **88**(12): 1086-90.
2. Cornelius MD, Leech SL, Goldschmidt L, Day NL. Prenatal tobacco exposure: is it a risk factor for early tobacco experimentation? *Nicotine Tob Res* 2000; **2**(1): 45-52.
3. Lange S, Probst C, Rehm J, Popova S. National, regional, and global prevalence of smoking during pregnancy in the general population: a systematic review and meta-analysis. *The Lancet Global Health* 2018.
4. McBride CM, Emmons KM, Lipkus IM. Understanding the potential of teachable moments: the case of smoking cessation. *Health education research* 2003; **18**(2): 156-70.
5. Schneider S, Huy C, Schuetz J. Smoking cessation during pregnancy: a systematic literature review. *Drug and Alcohol Review* 2010; **29**(1): 81-90.
6. Gould GS, Patten C, Glover M, Kira A, Jayasinghe H. Smoking in Pregnancy Among Indigenous Women in High-Income Countries: A Narrative Review. *Nicotine & Tobacco Research* 2017; **19**(5): 506-17.
7. Bottorf JL, Poole N, Kelly MT, Greaves L, Marcellus L, Jung M. Tobacco and alcohol use in the context of adolescent pregnancy and postpartum: a scoping review of the literature. *Health & Social Care in the Community* 2014; **22**(6): 561-74.
8. Rhodes-Keefe JM. Depression and smoking in the pregnant rural population: A Literature Review. *Online Journal of Rural Nursing & Health Care* 2015; **15**(1): 60-73.
9. Flemming K, Graham H, Heirs M, Fox D, Sowden A. Smoking in pregnancy: a systematic review of qualitative research of women who commence pregnancy as smokers. *Journal of Advance Nursing* 2013; **69**(5): 1023-36.
10. Flemming K, McCaughan D, Angus K, Graham H. Qualitative systematic review: barriers and facilitators to smoking cessation experienced by women in pregnancy and following childbirth. *Journal of Advanced Nursing* 2014.
11. Crane CA, Hawes SW, Weinberger AH. Intimate partner violence victimization and cigarette smoking: a meta-analytic review. *Trauma Violence & Abuse* 2013; **14**(4): 305-15.
12. Gould GS, Bovill M, Clarke MJ, Gruppetta M, Cadet-James Y, Bonevski B. Chronological narratives from smoking initiation through to pregnancy of Indigenous Australian women: a qualitative study *Midwifery* 2017; **52**: 27-33.
13. Graham H, Flemming K, Fox D, Heirs M, Sowden A. Cutting down: insights from qualitative studies of smoking in pregnancy. *Health & Social Care in the Community* 2013; **22**(3): 259-67.
14. Ingall G, Copley M. Exploring the barriers of quitting smoking during pregnancy: A systematic review of qualitative studies. *Women and Birth* 2010; **23**(2): 45-52.
15. Bovill M, Gruppetta M, Cadet-James Y, Clarke M, Bonevski B, Gould GS. Wula (Voices) of Aboriginal women on barriers to accepting smoking cessation support during pregnancy: Findings from a qualitative study. *Women and Birth* 2017.
16. Bar-Zeev Y, Lim LL, Bonevski B, Gruppetta M, Gould GS. Nicotine replacement therapy for smoking cessation in pregnancy. *Med J Aust* 2018; **208**(1): 1.
17. Stead LF, Lancaster T. Combined pharmacotherapy and behavioural interventions for smoking cessation. *Cochrane Database of Systematic Reviews* 2012, Issue 10 Art No: CD008286 2012.
18. Gould GS, Lim LL, Mattes J. Prevention and Treatment of Smoking and Tobacco Use During Pregnancy in Selected Indigenous Communities in High-Income Countries of the United States, Canada, Australia, and New Zealand. *CHEST* 2017; **152**(4): 853-66.
19. American College of Obstetricians and Gynecologists. Committee opinion no. 471: smoking cessation during pregnancy. *Obstet Gynecol* 2010; **116**(1241-1244).

20. Brose LS, McEwen, A. & West, R. Association between nicotine replacement therapy use in pregnancy and smoking cessation *Drug and Alcohol Dependence* 2013; **132**(3): 660-4.
21. NICE. Quitting smoking in pregnancy and following childbirth - NICE public health guidance 26. Manchester National Institute for Health and Clinical Excellence; 2010.
22. Zwar N, Richmond, R, Borland, R, Peters, M, Litt, J, Bell, J, Caldwell, B, Ferretter, I. Supporting smoking cessation: a guide for health professionals Melbourne: The Royal Australian College of General Practitioners; 2011 [Updated July 2014].
23. Ministry of Health. Background and recommendations of the New Zealand guidelines for helping people to stop smoking. . 2014.  
<https://www.health.govt.nz/system/files/documents/publications/backgroundrecommendations-new-zealand-guidelines-for-helpingstop-smoking-mar15-v2.pdf>
24. Canadian Action Network for the Advancement. Dissemination and adoption of practice-informed tobacco treatment. Canadian smoking cessation clinical practice guideline. 2011.  
<https://www.peelregion.ca/health/professionals/events/pdf/2013/canadappt-summary-statements.pdf> (accessed May 2017).
25. Fiore MC BW, Cohen SJ, Dorfman SF, Goldstein MG, Gritz ER, et al,. Smoking Cessation Clinical Practice Guidelines No. 18. Rockville, MD: U.S. Department of Human and Health Services, Public Health Service, Agency for Health Care Policy and Research, 1996.
26. Okoli CTC, Greaves L, Bottorff JL, Marcellus LM. Health care providers' engagement in smoking cessation with pregnant smokers. *JOGNN: Journal of Obstetric, Gynecologic & Neonatal Nursing* 2010; **39**(1): 64-77.
27. Baxter S, Everson-Hock E, Messina J, Guillaume L, Burrows J, Goyder E. Factors relating to the uptake of interventions for smoking cessation among pregnant women: a systematic review and qualitative synthesis. *Nicotine & tobacco research : official journal of the Society for Research on Nicotine and Tobacco* 2010; **12**(7): 685-94.
28. Siddiqi K, Mdege N. A global perspective on smoking during pregnancy. *The Lancet Global Health* 2018.
29. Michie S, Wood C, Johnston M, Abraham C, Francis J, Hardeman W. Chapter 1, General introduction. Behaviour change techniques: the development and evaluation of a taxonomic method for reporting and describing behaviour change interventions (a suite of five studies involving consensus methods, randomised controlled trials and analysis of qualitative data) Southampton, UK: NIHR Journals Library; 2015. p. 1-5.
30. Lorencatto F, West R, Michie S. Specifying evidence-based behavior change techniques to aid smoking cessation in pregnancy. *Nicotine & Tobacco Research* 2012; **14**(9): 1019-26.
31. Stroup DF, Berlin JA, Morton SC, et al. Meta-analysis of observational studies in epidemiology: a proposal for reporting. Meta-analysis Of Observational Studies in Epidemiology (MOOSE) group. *JAMA* 2000; **283**(15): 2008-12.
32. Hawker S, Payne S, Kerr C, Hardey M, Powell J. Appraising the evidence: reviewing disparate data systematically. *Qualitative health research* 2002; **12**(9): 1284-99.
33. Altman DG. Practical statistics for medical research: CRC press; 1990.
34. Abatemarco DJ, Steinberg MB, Delnevo DC. Midwives' Knowledge, Perceptions, Beliefs, and Practice Supports Regarding Tobacco Dependence Treatment. *Journal of Midwifery and Women's Health* 2007; **52**(5): 451-7.
35. Amarin ZO. Obstetricians, gynecologists and the anti-smoking campaign: A national survey. *European Journal of Obstetrics Gynecology and Reproductive Biology* 2005; **119**(2): 156-60.
36. Bakker MJ, De Vries H, Mullen PD, Kok G. Predictors of perceiving smoking cessation counselling as a midwife's role: A survey of Dutch midwives. *Eur J Public Health* 2005; **15**(1): 39-42.
37. Bar-Zeev Y, Bonevski B, Twyman L, et al. Opportunities Missed: A Cross-Sectional Survey of the Provision of Smoking Cessation Care to Pregnant Women by Australian General Practitioners and Obstetricians. *Nicotine & Tobacco Research* 2017; **19**(5): 636-41.
38. Beenstock J, Sniehotta FF, White M, Bell R, Milne EM, Araujo-Soares V. What helps and hinders midwives in engaging with pregnant women about stopping smoking? A cross-sectional survey of perceived implementation difficulties among midwives in the North East of England. *Implementation Science* 2012; **7**: 36.

- 1  
2  
3 39. Berrueta M, Morello P, Alemán A, et al. Smoking Patterns and Receipt of Cessation Services  
4 Among Pregnant Women in Argentina and Uruguay. *Nicotine & Tobacco Research* 2016; **18**(5):  
5 1116-25.
- 6 40. Bonollo DP, Zapka JG, Stoddard AM, Ma Y, Pbert L, Ockene JK. Treating nicotine  
7 dependence during pregnancy and postpartum: understanding clinician knowledge and performance.  
8 *Patient Education & Counseling* 2002; **48**(3): 265-74.
- 9 41. Bull L, Whitehead E. Smoking cessation intervention with pregnant women and new parents:  
10 a survey of health visitors, midwives and practice nurses. *Journal of Neonatal Nursing* 2006; **12**(6):  
11 209-15.
- 12 42. Castrucci BC, Culhane JF, Chung EK, Bennett I, McCollum KF. Smoking in pregnancy:  
13 patient and provider risk reduction behavior. *J Public Health Manag Pract* 2006; **12**(1): 68-76.
- 14 43. Chang JC, Dado D, Frankel RM, et al. When pregnant patients disclose substance use: missed  
15 opportunities for behavioral change counseling. *Patient education and counseling* 2008; **72**(3): 394-  
16 401.
- 17 44. Chang JC, Alexander SC, Holland CL, et al. Smoking is bad for babies: obstetric care  
18 providers' use of best practice smoking cessation counseling techniques. *American journal of health*  
19 *promotion : AJHP* 2013; **27**(3): 170-6.
- 20 45. Clasper P, White M. Smoking cessation interventions in pregnancy: practice and views of  
21 midwives, GPs and obstetricians. *Health Education Journal* 1995; **54**(2): 150-62.
- 22 46. Coleman-Cowger VH, Anderson BL, Mahoney J, Schulkin J. Smoking cessation during  
23 pregnancy and postpartum: Practice patterns among obstetrician-gynecologists. *Journal of Addiction*  
24 *Medicine* 2014; **8**(1): 14-24.
- 25 47. Condliffe L, McEwen A, West R. The attitude of maternity staff to, and smoking cessation  
26 interventions with, childbearing women in London. *Midwifery* 2005; **21**(3): 233-40.
- 27 48. Cooke M, Mattick RP, Barclay L. Predictors of brief smoking intervention in a midwifery  
28 setting. *Addiction* 1996; **91**(11): 1715-25.
- 29 49. Eiser J, Main N, Lee A, Hajek P. Midwife attitudes and advice to pregnant smokers.  
30 *Addiction Research* 1999; **7**(4): 355-68.
- 31 50. England LJ, Anderson BL, Tong VT, et al. Screening practices and attitudes of obstetricians-  
32 gynecologists toward new and emerging tobacco products. *American journal of obstetrics and*  
33 *gynecology* 2014; **211**(6): 695.e1-7.
- 34 51. Floyd RL, Belodoff B, Sidhu J, Schulkin J, Ebrahim SH, Sokol RJ. A survey of obstetrician-  
35 gynecologists on their patients' use of tobacco and other drugs during pregnancy. *Prenatal and*  
36 *Neonatal Medicine* 2001; **6**(4): 201-7.
- 37 52. Glover M, Paynter J, Bullen C, Kristensen K. Supporting pregnant women to quit smoking:  
38 Postal survey of New Zealand general practitioners and midwives' smoking cessation knowledge and  
39 practices. *New Zealand Medical Journal* 2008; **121**(1270): 53-64.
- 40 53. Grange G, Vayssiere C, Borgne A, et al. Characteristics of tobacco withdrawal in pregnant  
41 women. *European Journal of Obstetrics, Gynecology, & Reproductive Biology* 2006; **125**(1): 38-43.
- 42 54. Grimley DM, Bellis JM, Raczynski JM, Henning K. Smoking cessation counseling practices:  
43 a survey of Alabama obstetrician-gynecologists. *South Med J* 2001; **94**(3): 297-303.
- 44 55. Hartmann KE, Wechter ME, Payne P, Salisbury K, Jackson RD, Melvin CL. Best practice  
45 smoking cessation intervention and resource needs of prenatal care providers. *Obstetrics and*  
46 *Gynecology* 2007; **110**(4): 765-70.
- 47 56. Helwig AL, Swain GR, Gottlieb M. Smoking cessation intervention: the practices of  
48 maternity care providers. *The Journal of the American Board of Family Practice / American Board of*  
49 *Family Practice* 1998; **11**(5): 336-40.
- 50 57. Herbert R, Coleman T, Britton J. U.K. general practitioners' beliefs, attitudes, and reported  
51 prescribing of nicotine replacement therapy in pregnancy. *Nicotine and Tobacco Research* 2005; **7**(4):  
52 541-6.
- 53 58. Hickner J, Cousineau A, Messimer S. Smoking cessation during pregnancy: strategies used  
54 by Michigan family physicians. *The Journal of the American Board of Family Practice / American*  
55 *Board of Family Practice* 1990; **3**(1): 39-42.
- 56  
57  
58  
59  
60

- 1  
2  
3 59. Hoekzema L, Werumeus Buning A, Bonevski B, et al. Smoking rates and smoking cessation preferences of pregnant women attending antenatal clinics of two large Australian maternity hospitals. *The Australian & New Zealand journal of obstetrics & gynaecology* 2014; **54**(1): 53-8.
- 4 60. Howard L, Rowe M, Bewley S, Marteau T, Demilew J. Smoking cessation in pregnant women with mental disorders: A cohort and nested qualitative study. *European Psychiatry* 2013; **28**.
- 5 61. Jones D. Changing practice. Exploring the value of smoking cessation advice. *British Journal of Midwifery* 2003; **11**(4): 212-5.
- 6 62. Jordan TR, Dake JA, Price JH. Best practice for smoking cessation in pregnancy: Do obstetrician/gynecologists use them in practice? *Journal of Women's Health* 2006; **15**(4): 400-11.
- 7 63. Lemola S, Meyer-Leu Y, Samochowiec J. Control Beliefs Are Related to Smoking Prevention in Prenatal Care. *Inside Childbirth Education* 2012: 7-.
- 8 64. Mabbutt J, Bauman A, Moshin M. Tobacco use of pregnant women and their male partners who attend antenatal classes: What happened to routine quit smoking advice in pregnancy? *Australian and New Zealand journal of public health* 2002; **26**(6): 571-2.
- 9 65. McEwen A, West R, Mitchell S, Ussher M. Problems identifying pregnant smokers. *British Journal of Midwifery* 2003; **11**(11): 648-.
- 10 66. Mejia R, Martinez VG, Gregorich SE, Perez-Stable EJ. Physician counseling of pregnant women about active and secondhand smoking in Argentina. *Acta Obstet Gynecol Scand* 2010; **89**(4): 490-5.
- 11 67. Moran S, Thorndike AN, Armstrong K, Rigotti NA. Physicians' missed opportunities to address tobacco use during prenatal care. *Nicotine and Tobacco Research* 2003; **5**(3): 363-8.
- 12 68. Mullen PD, Pollak KI, Titus JP, Sockrider MM, May JG. Prenatal smoking cessation counselling by Texas obstetricians. *Birth: Issues in Perinatal Care* 1998; **25**(1): 25-31.
- 13 69. Murphy K, Steyn K, Mathews C. The midwife's role in providing smoking cessation interventions for pregnant women: The views of midwives working with high risk, disadvantaged women in public sector antenatal services in South Africa. *International Journal of Nursing Studies* 2016; **53**: 228-37.
- 14 70. Oncken CA, Pbert L, Ockene JK, Zapka J, Stoddard A. Nicotine replacement prescription practices of obstetric and pediatric clinicians. *Obstetrics and Gynecology* 2000; **96**(2): 261-5.
- 15 71. Owen L, McNeill A. The role of health professionals in reducing smoking in pregnancy. *Contemporary Reviews in Obstetrics and Gynaecology* 1999; **11**(4): 235-8.
- 16 72. Passey ME, D'Este CA, Sanson-Fisher RW. Knowledge, attitudes and other factors associated with assessment of tobacco smoking among pregnant Aboriginal women by health care providers: a cross-sectional survey. *BMC public health* 2012; **12**: 165.
- 17 73. Passey ME, Sanson-Fisher RW. Provision of antenatal smoking cessation support: A survey with pregnant Aboriginal and Torres Strait Islander women. *Nicotine & Tobacco Research* 2015; **17**(6): 746-9.
- 18 74. Passey ME, Sanson-Fisher RW, Stirling JM. Supporting pregnant Aboriginal and Torres Strait Islander women to quit smoking: views of antenatal care providers and pregnant indigenous women. *Maternal and child health journal* 2014; **18**(10): 2293-9.
- 19 75. Price JH, Jordan TR, Dake JA. Obstetricians and gynecologists' perceptions and use of nicotine replacement therapy. *J Community Health* 2006; **31**(3): 160-75.
- 20 76. Price JH, Jordan TR, Dake JA. Perceptions and Use of Smoking Cessation in Nurse-Midwives' Practice. *Journal of Midwifery and Women's Health* 2006; **51**(3): 208-15.
- 21 77. Pullon S, Webster M, McLeod D, Benn C, Morgan S. Smoking cessation and nicotine replacement therapy in current primary maternity care. *Australian family physician* 2004; **33**(1-2): 94-6.
- 22 78. Röske K, Hannover W, Thyrian JR, John U, Hannich HJ. Smoking cessation counselling for pregnant and postpartum women among midwives, gynaecologists and paediatricians in Germany. *International journal of environmental research and public health* 2009; **6**(1): 96-107.
- 23 79. Solberg LI, Parker ED, Foldes SS, Walker PF. Disparities in tobacco cessation medication orders and fills among special populations. *Nicotine & tobacco research : official journal of the Society for Research on Nicotine and Tobacco* 2010; **12**(2): 144-51.
- 24  
25  
26  
27  
28  
29  
30  
31  
32  
33  
34  
35  
36  
37  
38  
39  
40  
41  
42  
43  
44  
45  
46  
47  
48  
49  
50  
51  
52  
53  
54  
55  
56  
57  
58  
59  
60



- 1  
2  
3 80. Tappin DM, MacAskill S, Bauld L, Eadie D, Shipton D, Galbraith L. Smoking prevalence  
4 and smoking cessation services for pregnant women in Scotland. *Substance abuse treatment,*  
5 *prevention, and policy* 2010; **5**: 1.
- 6 81. Thyrian JR, Hannover W, Roske K, Scherbarth S, Hapke U, John U. Midwives' attitudes to  
7 counselling women about their smoking behaviour during pregnancy and postpartum. *Midwifery*  
8 2006; **22**(1): 32-9.
- 9 82. Tong VT, England LJ, Dietz PM, Asare LA. Smoking patterns and use of cessation  
10 interventions during pregnancy. *American journal of preventive medicine* 2008; **35**(4): 327-33.
- 11 83. Tran ST, Rosenberg KD, Carlson NE. Racial/ethnic disparities in the receipt of smoking  
12 cessation interventions during prenatal care. *Maternal and child health journal* 2010; **14**(6): 901-9.
- 13 84. Tzelepis F, Daly J, Dowe S, Bourke A, Gillham K, Freund M. Supporting Aboriginal Women  
14 to Quit Smoking: Antenatal and Postnatal Care Providers' Confidence, Attitudes, and Practices.  
15 *Nicotine & Tobacco Research* 2017; **19**(5): 642-6.
- 16 85. Walsh RA, Redman S, Brinsmead MW, Arnold B. Smoking cessation in pregnancy: A survey  
17 of the medical and nursing directors of public antenatal clinics in Australia. *Australian and New*  
18 *Zealand Journal of Obstetrics and Gynaecology* 1995; **35**(2): 144-50.
- 19 86. Zapka JG, Pbert L, Stoddard AM, Ockene JK, Goins KV, Bonollo D. Smoking cessation  
20 counseling with pregnant and postpartum women: a survey of community health center providers.  
21 *American journal of public health* 2000; **90**(1): 78-84.
- 22 87. Cooke M, Mattick RP, Campbell E. The influence of individual and organizational factors on  
23 the reported smoking intervention practices of staff in 20 antenatal clinics. *Drug and Alcohol Review*  
24 1998; **17**(2): 175-85.
- 25 88. Bar-Zeev Y, Bonevski B, Gruppetta M, et al. Clinician factors associated with prescribing  
26 nicotine replacement therapy in pregnancy: A cross-sectional survey of Australian obstetricians and  
27 general practitioners. *Australian and New Zealand Journal of Obstetrics and Gynaecology* 2017.
- 28 89. Vidrine JI, Shete S, Cao Y, et al. Ask-Advise-Connect: a new approach to smoking treatment  
29 delivery in health care settings. *JAMA internal medicine* 2013; **173**(6): 458-64.
- 30 90. Crane R. The most addictive drug, the most deadly substance: smoking cessation tactics for  
31 the busy clinician. *Primary Care: Clinics in Office Practice* 2007; **34**(1): 117-35.
- 32 91. Chamberlain C, O'Mara-Eves A, Porter J, et al. Psychosocial interventions for supporting  
33 women to stop smoking in pregnancy. *Cochrane Database of Systematic Reviews* 2017, Issue 2 Art  
34 No: CD001055 2017.
- 35 92. Cochrane Collaboration. Effective Practice and Organisation of Care (EPOC). 2015.  
36 <https://epoc.cochrane.org/epoc-taxonomy2018>.
- 37 93. Ministry of Health. Implementing the ABC approach for smoking cessation: Framework and  
38 work programme. Wellington, New Zealand: Ministry of Health, 2009.
- 39 94. Gould GS, Bittoun R, Clarke MJ. A Pragmatic Guide for Smoking Cessation Counselling and  
40 the Initiation of Nicotine Replacement Therapy for Pregnant Aboriginal and Torres Strait Islander  
41 Smokers. *Journal of Smoking Cessation* 2015; **10**: 96-105.
- 42  
43  
44  
45  
46  
47  
48  
49  
50  
51  
52  
53  
54  
55  
56  
57  
58  
59  
60

1  
2  
3 **Tables**  
4  
5  
6

7 **Table 1: Meta-regression analysis of HP practices performed ‘often/always’**  
8

9

| Predictors       | ASK   | ADVISE | ASSIST | ARRANGE | NRT   |
|------------------|-------|--------|--------|---------|-------|
| <i>N</i> studies | 9     | 7      | 5***   | 6       | 6     |
| No predictors    |       |        |        |         |       |
| $I^2$ resid      | 96%   | 91.9%  | 72.9%  | 95.9%   | 97%   |
| $\tau^2$         | 0.008 | 0.0304 | 0.003  | 0.019   | 0.017 |
| Provider type    |       |        |        |         |       |
| p-value          | 0.18  | 0.487  | 0.134  | 0.898   | 0.304 |
| $I^2$ resid      | 95.6% | 87.7%  |        | 97.4%   | 94.8% |
| $\tau^2$         | 0.006 | 0.031  |        | 0.029   | 0.013 |
| High risk        |       |        |        |         |       |
| p-value          | 0.909 | **     | 0.43   | 0.62    | **    |
| $I^2$ resid      | 96.4% |        |        | 96.7%   |       |
| $\tau^2$         | 0.009 |        |        | 0.021   |       |
| Country          |       |        |        |         |       |
| p-value          | 0.845 | 0.252  | 0.185  | 0.037   | 0.903 |
| $I^2$ resid      | 96.5% | 89.4%  |        | 84.5%   | 97.6% |
| $\tau^2$         | 0.012 | 0.022  |        | 0.006   | 0.021 |
| Year             |       |        |        |         |       |
| p-value          | *     | *      | *      | 0.013   | *     |
| $I^2$ resid      |       |        |        | 73.9%   |       |

38 \* non-linear, \*\*model not performed, \*\*\*too few studies  
39  
40  
41  
42  
43  
44  
45  
46  
47  
48  
49  
50  
51  
52  
53  
54  
55  
56  
57  
58  
59  
60

**Table 2: Quality assessment of 54 included studies**

| <b>Author (year)</b>  | <b>Abstract and title</b> | <b>Intro and aims</b> | <b>Method and data</b> | <b>Sampling</b> | <b>Data analysis</b> | <b>Ethics and bias</b> | <b>Results</b> | <b>Transferability</b> | <b>Implications and usefulness</b> |
|-----------------------|---------------------------|-----------------------|------------------------|-----------------|----------------------|------------------------|----------------|------------------------|------------------------------------|
| Abatemarco (2007)     | Good                      | Good                  | Fair                   | Good            | Fair                 | Fair                   | Poor           | Good                   | Good                               |
| Amarin (2005)         | Poor                      | Fair                  | Poor                   | Poor            | Poor                 | Poor                   | Poor           | Poor                   | Fair                               |
| Bakker (2005)         | Fair                      | Fair                  | Fair                   | Fair            | Fair                 | Poor                   | Fair           | Fair                   | Fair                               |
| Bar Zeev (2017)       | Good                      | Good                  | Good                   | Good            | Fair                 | Fair                   | Good           | Fair                   | Good                               |
| Beenstock (2012)      | Good                      | Good                  | Good                   | Good            | Good                 | Fair                   | Good           | Good                   | Good                               |
| Berruetas (2016)      | Fair                      | fair                  | Fair                   | Good            | Fair                 | Fair                   | Good           | Good                   | Good                               |
| Bonollo (2002)        | Good                      | Good                  | Good                   | Fair            | Good                 | Good                   | Fair           | Fair                   | Fair                               |
| Bull (2006)           | Fair                      | Fair                  | Fair                   | Fair            | Fair                 | Good                   | Good           | Fair                   | Good                               |
| Castrucci (2006)      | Fair                      | Fair                  | Fair                   | Fair            | Fair                 | Very poor              | Fair           | Fair                   | Fair                               |
| Chang (2008)          | Good                      | Good                  | Good                   | Fair            | Fair                 | Good                   | Fair           | Fair                   | Fair                               |
| Chang (2013)          | Fair                      | Good                  | Good                   | Fair            | Good                 | Good                   | Fair           | Fair                   | Good                               |
| Clasper (1995)        | Fair                      | Fair                  | Fair                   | Fair            | Fair                 | Fair                   | Fair           | Fair                   | Fair                               |
| Coleman-Cowger (2014) | Good                      | Fair                  | Good                   | Good            | Fair                 | Very poor              | Fair           | Fair                   | Good                               |
| Condcliffe (2005)     | Good                      | Fair                  | Good                   | Fair            | Fair                 | Fair                   | Fair           | Fair                   | Fair                               |
| Cooke (1996)          | Good                      | Fair                  | Fair                   | Good            | Good                 | Fair                   | Good           | Good                   | Good                               |
| Cooke (1998)          | Fair                      | Fair                  | Fair                   | Fair            | Good                 | Fair                   | Fair           | Fair                   | Fair                               |
| Eiser (1999)          | Fair                      | Fair                  | Fair                   | Fair            | Fair                 | Poor                   | Fair           | Fair                   | Fair                               |
| England (2014)        | Good                      | Good                  | Fair                   | Good            | Good                 | Good                   | Good           | Good                   | Good                               |
| Floyd (2001)          | Fair                      | Fair                  | Fair                   | Poor            | Fair                 | Fair                   | Fair           | Poor                   | Fair                               |
| Glover (2008)         | Fair                      | Fair                  | Poor                   | Fair            | Poor                 | Fair                   | Fair           | Fair                   | Fair                               |
| Grange (2006)         | Poor                      | Fair                  | Poor                   | Fair            | Fair                 | Poor                   | Fair           | Fair                   | Fair                               |



|    |                 |      |      |      |           |      |      |      |      |      |
|----|-----------------|------|------|------|-----------|------|------|------|------|------|
| 1  |                 |      |      |      |           |      |      |      |      |      |
| 2  |                 |      |      |      |           |      |      |      |      |      |
| 3  |                 |      |      |      |           |      |      |      |      |      |
| 4  | Grimley (2001)  | Good | Good | Good | Good      | Fair | Good | Good | Fair | Good |
| 5  | Hartmann (2007) | Good | Good | Good | Fair      | Fair | Good | Good | Fair | Fair |
| 6  | Helwig (1998)   | Good | Fair | Fair | Fair      | Fair | Fair | Fair | Fair | Fair |
| 7  | Herbert (2005)  | Fair | Fair | Fair | Fair      | Fair | Fair | Fair | Fair | Fair |
| 8  | Hickner (1990)  | Fair | Poor | Fair | Fair      | Fair | Poor | Fair | Fair | Fair |
| 9  |                 |      |      |      |           |      |      |      |      |      |
| 10 |                 |      |      |      |           |      |      |      |      |      |
| 11 | Hoekzema (2014) | Good | Good | Good | Good      | Fair | Fair | Good | Good | Fair |
| 12 | Howard (2013)   | Good | Good | Good | Good      | Good | Good | Good | Fair | Good |
| 13 | Jones (2003)    | Good | Good | Fair | Fair      | Fair | Fair | Fair | Fair | Fair |
| 14 |                 |      |      |      |           |      |      |      |      |      |
| 15 | Jordan (2006)   | Fair | Fair | Fair | Fair      | Fair | Poor | Fair | Fair | Good |
| 16 | Lemola (2012)   | Good | Good | Good | Good      | Good | Fair | Good | Good | Good |
| 17 |                 |      |      |      |           |      |      |      |      |      |
| 18 | Mabbutt (2002)  | Good | Good | Fair | Poor      | Fair | Fair | Good | Poor | Fair |
| 19 | McEwen (2003)   | NA   | NA   | NA   | NA        | NA   | NA   | NA   | NA   | NA   |
| 20 |                 |      |      |      |           |      |      |      |      |      |
| 21 | Mejia (2010)    | Good | Fair | Fair | Good      | Fair | Poor | Fair | Fair | Good |
| 22 | Moran (2003)    | Fair | Good | Good | Good      | Good | Poor | Good | Good | Good |
| 23 |                 |      |      |      |           |      |      |      |      |      |
| 24 | Mullen (1998)   | Fair | Good | Fair | Fair      | Good | Poor | Fair | Fair | Fair |
| 25 | Murphy (2016)   | Fair | Fair | Fair | Good      | Fair | Good | Fair | Good | Good |
| 26 | Oncken (2000)   | Good | Fair | Good | Good      | Good | Poor | Good | Good | Fair |
| 27 |                 |      |      |      |           |      |      |      |      |      |
| 28 | Owen (1999)     | Poor | Fair | Poor | Very poor | Poor | Poor | Poor | Fair | Fair |
| 29 | Passey (2012)   | Good | Fair | Fair | Fair      | Fair | Fair | Fair | Fair | Good |
| 30 |                 |      |      |      |           |      |      |      |      |      |
| 31 | Passey (2015)   | Fair | Fair | Good | Fair      | Fair | Fair | Fair | Fair | Fair |
| 32 | Passey (2014)   | Fair | Fair | Fair | Fair      | Good | Fair | Good | Fair | Good |
| 33 |                 |      |      |      |           |      |      |      |      |      |
| 34 | Price (2006)    | Good | Fair | Good | Fair      | Good | Poor | Good | Fair | Good |
| 35 | Price (2006)    | Good | Fair | Fair | Fair      | Fair | Fair | Fair | Fair | Fair |
| 36 |                 |      |      |      |           |      |      |      |      |      |
| 37 | Pullon (2004)   | Fair | Fair | Fair | Fair      | Fair | Poor | Fair | Fair | Fair |
| 38 | Roske (2009)    | Good | Good | Fair | Good      | Good | Fair | Good | Good | Fair |
| 39 | Solberg (2010)  | Good | Good | Good | Good      | Good | Good | Good | Good | Good |
| 40 |                 |      |      |      |           |      |      |      |      |      |
| 41 | Tappin (2010)   | Fair | Fair | Fair | Good      | Poor | Fair | Fair | Fair | Fair |
| 42 | Thyrian (2006)  | Good | Good | Good | Good      | Good | Good | Good | Good | Good |
| 43 |                 |      |      |      |           |      |      |      |      |      |
| 44 | Tong (2008)     | Good | Good | Fair | Good      | Fair | Poor | Fair | Good | Fair |
| 45 | Tran (2010)     | Good | Fair | Good | Good      | Good | Fair | Good | Good | Good |
| 46 |                 |      |      |      |           |      |      |      |      |      |
| 47 | Tzelepis (2017) | Good | Fair | Good | Good      | Good | Good | Good | Good | Good |
| 48 | Walsh (1995)    | Good | Fair | Good | Fair      | Fair | Fair | Good | Fair | Fair |
| 49 | Zapka (2000)    | Good | Fair | Good | Fair      | Good | Fair | Good | Fair | Fair |

---

NA – not applicable as was a letter to the Editor

51  
52  
53  
54  
55  
56  
57  
58  
59  
60

**Table 3: Findings from agreement analysis of coders**

| <i>Study Criteria</i>       | <i>Mean Rating (SD)</i> |                | <i>Weighted kappa<br/>(95%CI)</i> | <i>Agreement</i> |
|-----------------------------|-------------------------|----------------|-----------------------------------|------------------|
|                             | <i>Rater 1</i>          | <i>Rater 2</i> |                                   |                  |
| Abstract and title          | 2.4 (0.6)               | 2.3 (0.6)      | 0.13 (-0.41, 0.68)                | Poor             |
| Intro and aims              | 2.3 (0.5)               | 2.1 (0.3)      | 0.25 (-0.17, 0.67)*               | Fair             |
| Method and data             | 2.2 (0.6)               | 2.3 (0.6)      | -0.15 (-0.74, 0.43)               | Poor             |
| Sampling                    | 2.1 (0.8)               | 2.3 (0.6)      | 0.43 (0.10, 0.76)                 | Moderate         |
| Data analysis               | 2.1 (0.6)               | 2.1 (0.5)      | 0.51 (0.03, 0.99)                 | Moderate         |
| Ethics and bias             | 1.9 (0.8)               | 1.9 (1.0)      | 0.38 (0.13, 0.63)                 | Fair             |
| Results                     | 2.3 (0.7)               | 2.4 (0.5)      | 0.26 (-0.11, 0.62)                | Fair             |
| Transferability             | 2.2 (0.4)               | 2.3 (0.6)      | 0.21 (-0.19, 0.61)                | Fair             |
| Implications and usefulness | 2.4 (0.6)               | 2.5 (0.6)      | 0.58 (0.18, 0.98)                 | Moderate         |

\*only 2 levels, therefore Kappa rather than weighted Kappa used

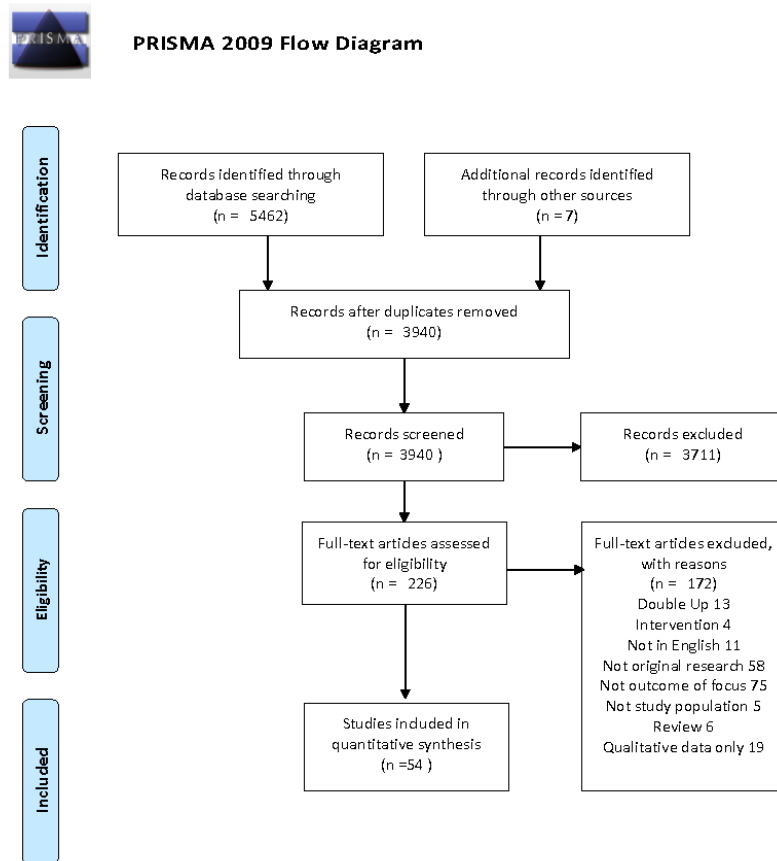

Figure 1: PRISMA Flow Chart of study selection

215x279mm (106 x 106 DPI)

1  
2  
3  
4  
5  
6  
7  
8  
9  
10  
11  
12  
13  
14  
15  
16  
17  
18  
19  
20  
21  
22  
23  
24  
25  
26  
27  
28  
29  
30  
31  
32  
33  
34  
35  
36  
37  
38  
39  
40  
41  
42  
43  
44  
45  
46  
47  
48  
49  
50  
51  
52  
53  
54  
55  
56  
57  
58  
59  
60

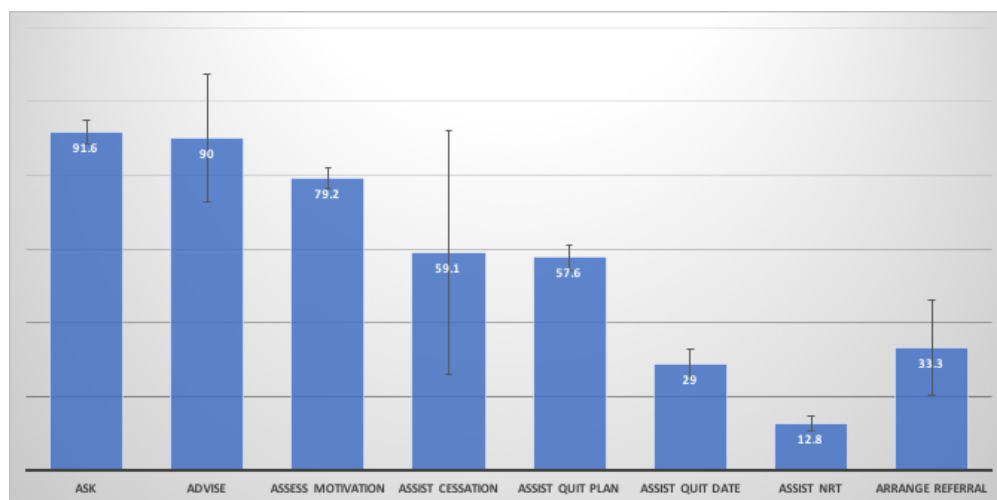

Figure 2: Pooled percentages of HP self-report of performance of the 5As 'often/always'

237x117mm (72 x 72 DPI)

**Supplementary File**

Supplementary Table A: Key search terms for systematic review on Health Providers’ Practices for Smoking Cessation Care in Pregnancy

| <b>Health Professional</b> | <b>Attitudes and Practices</b>        | <b>Smoking</b>               | <b>Pregnancy</b>   |
|----------------------------|---------------------------------------|------------------------------|--------------------|
| Allied health personnel    | Health Knowledge, Attitudes, Practice | Tobacco dependence treatment | Maternal behaviour |
| General practitioner       | Attitude of Health Personnel          | Maternal tobacco smoking     | Perinatal Care     |
| Medical practitioner       | Knowledge                             | Smoking Cessation            | Pregnancy          |
| Health Professional        | Perception                            | Tobacco use disorder         | Maternal           |
| Health personnel           | Practice                              | Nicotine dependence          | Mother             |
| Family Practice            | Belief                                | Smoking treatment            | Preg*              |
| Specialist                 | Capacity                              | Smoking                      | Antenatal          |
| Physician                  | Capability                            | Smok*                        |                    |
| Doctor                     | Confidence                            | Tobacco                      |                    |
| Midwife                    | Priority                              |                              |                    |
| Gynaecology                | Barrier                               |                              |                    |
| Obstetrics                 | Attitude                              |                              |                    |
| Clinician                  | Skill                                 |                              |                    |
| Dentist                    | Ability                               |                              |                    |
| Pharmacist                 |                                       |                              |                    |
| Consultant                 |                                       |                              |                    |

*Note:* all search terms were “exploded”, meaning the terms underneath these keywords were also searched for.

**Supplementary Table B: Characteristics of included quantitative (N=54) studies**

| First Author (year)<br>Country | Study Focus                                      | Population & Risk Category (high/low) | Study Aim(s)                                                                                                                                                                                                                                                             | Ask | Advise | Assess | Assist | Arrange follow up | NRT | Summary of results                                                                                                                                                                                                                                                                                                                                                                                                                                                                                                                                                                                                                                                                       |
|--------------------------------|--------------------------------------------------|---------------------------------------|--------------------------------------------------------------------------------------------------------------------------------------------------------------------------------------------------------------------------------------------------------------------------|-----|--------|--------|--------|-------------------|-----|------------------------------------------------------------------------------------------------------------------------------------------------------------------------------------------------------------------------------------------------------------------------------------------------------------------------------------------------------------------------------------------------------------------------------------------------------------------------------------------------------------------------------------------------------------------------------------------------------------------------------------------------------------------------------------------|
| Abatemarco (2007)<br>USA       | Health Providers (Midwives)                      | Low risk                              | Determine how New Jersey's certified nurse-midwives (CNMs) provide tobacco screening and cessation counselling to pregnant smoking women.                                                                                                                                | X   | X      | X      | X      | X                 |     | Nearly all midwives routinely ask, advise, and assess; while fewer address quit dates, or discuss medication options (assist) and perform follow-up activities (arrange). Midwives identify a need for training.                                                                                                                                                                                                                                                                                                                                                                                                                                                                         |
| Amarin (2005)<br>Jordan        | Health Providers (Obstetrician & Gynaecologists) | Low risk                              | Establish tobacco use amongst obstetricians/gynaecologists and assess awareness of the impact of smoking on health; routine practices with patients who smoke; opinions of factors contributing to tobacco use and their perceived barriers to counselling improvements. | X   | X      |        | X      |                   |     | A high proportion of obstetricians/gynaecologists are smokers. Most health professionals associated smoking with low birth weight and sudden infant death syndrome. Fewer associated smoking with infertility, ectopic pregnancy, placenta praevia, abruption placentae and cancer of the uterine cervix. Friends, stress, parents' attitude, genetic predisposition, income and education were implicated factors for smoking. Current smokers were more likely to permit smoking in their practices. Non-smokers were most inclined to record their patients' tobacco habits. Only 54.3% provided cessation counselling. Lack of time and inadequate training were perceived barriers. |
| Bakker (2005)<br>Netherlands   | Pregnant Women                                   | Low risk                              | To identify relevant factors that hamper or promote the provision of effective smoking cessation advice and counselling.                                                                                                                                                 |     |        |        | NA*    |                   |     | In general, midwives were motivated to provide their clients with smoking cessation advice, however, were less comfortable guiding women through the cessation process.                                                                                                                                                                                                                                                                                                                                                                                                                                                                                                                  |
| Bar-Zeev (2017)<br>Australia   | Health Providers (GPs & Obstetricians)           | Low risk                              | Examine: 1) Self-reported provision of SCC to pregnant women by GPs and Obstetricians in Australia; 2) Barriers and enablers to SCC and 3)                                                                                                                               | X   | X      | X      | X      | X                 | X   | Almost all clinicians (98%) reported that addressing smoking during pregnancy is a high priority, and that they feel comfortable raising the issue with a pregnant woman (95%). TDF statements receiving the lowest agreement( agree & strongly agree) were having sufficient time (41%), sufficient resources (47.5%) and optimism of intervention effectiveness (35%). Dimension reduction revealed two factors: 1) 'Internal influences' including confidence in counselling, confidence in prescribing NRT, optimism, sufficient                                                                                                                                                     |



relation to smoking cessation interventions with pregnant women and new parents.

|    |                      |                                                                                                          |          |                                                                                                                                                                                                                                                                                                  |   |   |   |   |   |   |                                                                                                                                                                                                                                                                                                                                                                                                                                                                                                                     |
|----|----------------------|----------------------------------------------------------------------------------------------------------|----------|--------------------------------------------------------------------------------------------------------------------------------------------------------------------------------------------------------------------------------------------------------------------------------------------------|---|---|---|---|---|---|---------------------------------------------------------------------------------------------------------------------------------------------------------------------------------------------------------------------------------------------------------------------------------------------------------------------------------------------------------------------------------------------------------------------------------------------------------------------------------------------------------------------|
| 7  | Castrucci (2006) USA | Pregnant Women                                                                                           | Low risk | Describe the range of risk reduction behaviours among women who continue to smoke after learning of their pregnancy, including reduce tobacco use, eventual cessation and sustained abstinence as well the patient-reported smoking cessation - promoting behaviours of prenatal care providers. |   |   |   | X | X |   | Smoking cessation was achieved by only a quarter of antenatal smokers, almost 90 percent reduced their cigarette consumption. Antenatal smokers reported that prenatal care providers asked about their smoking (90.6%) and advised about quitting (76.5%). However, only 27.9% were given referrals to smoking cessation programs.                                                                                                                                                                                 |
| 17 | Chang (2008) USA     | Pregnant Women & Health Providers (Obstetrics-Gynaecology Resident, Nurse Midwife, & Nurse Practitioner) | Low risk | Examine patient-provider communication about substance use behaviours during obstetric visits.                                                                                                                                                                                                   | X | X | X | X | X |   | Provider responses to smoking disclosures included discussions of risks, encouragement to quit-cut down, affirmation of attempts to quit-cut down, and referral to smoking cessation programs. Providers should discuss behavioural change strategies and motivations with pregnant patients who use substances.                                                                                                                                                                                                    |
| 25 | Chang (2013) USA     | Health Providers (Nurse Midwife, Nurse Practitioner, Residents, Physician Assistant)                     | Low risk | Describe obstetric providers' adherence to the evidence-based clinical practice guideline for smoking cessation counselling, the 5 A's (Ask, Advice, Assess, Assist, and Arrange).                                                                                                               | X | X | X | X | X | X | Obstetric providers frequently asked about smoking (98%) however, used 3 or more of the 5 A's in only 21% (24) of visits. In no visits did providers use all 5 A's.                                                                                                                                                                                                                                                                                                                                                 |
| 31 | Clasper (1995) UK    | Health Providers (Hospital Midwives, Community Midwives, General Practitioners, Obstetricians)           | Low risk | To inform the development of future smoking cessation interventions in pregnancy by measuring current practice and the associated attitudes and beliefs of the main professionals responsible for the delivery of antenatal care.                                                                | X | X |   | X | X |   | Most professionals asked about the smoking status of pregnant women, record smoking status and explain the risks of smoking while pregnant. Fewer professionals gave pregnant smokers advice on how to stop or monitored at and reviewed smoking status throughout pregnancy. Most experienced difficulty and a lack of enjoyment while giving smoking cessation counselling. Over half (53%) perceived themselves to be insufficiently trained, whilst few (28%) thought that they possessed the necessary skills. |



1  
2  
3  
4  
5  
6  
7  
8  
9  
10  
11  
12  
13  
14  
15  
16  
17  
18  
19  
20  
21  
22  
23  
24  
25  
26  
27  
28  
29  
30  
31  
32  
33  
34  
35  
36  
37  
38  
39  
40  
41  
42  
43  
44  
45  
46

|                           |                                                                                       |          |                                                                                                                                                                                                                                             |   |   |   |   |   |     |                                                                                                                                                                                                                                                                                                                                                                                                                                                                                                                                                                                                                                                                                                                                                                                                                                                        |
|---------------------------|---------------------------------------------------------------------------------------|----------|---------------------------------------------------------------------------------------------------------------------------------------------------------------------------------------------------------------------------------------------|---|---|---|---|---|-----|--------------------------------------------------------------------------------------------------------------------------------------------------------------------------------------------------------------------------------------------------------------------------------------------------------------------------------------------------------------------------------------------------------------------------------------------------------------------------------------------------------------------------------------------------------------------------------------------------------------------------------------------------------------------------------------------------------------------------------------------------------------------------------------------------------------------------------------------------------|
| Coleman-Cowger (2014) USA | Health Providers (Obstetrician & Gynaecologists)                                      | Low risk | To assess current ob-gyn practice patterns related to the management of and barriers to smoking cessation during pregnancy and postpartum.                                                                                                  | X | X | X | X | X | X   | Ob-gyns estimated that approximated that 32% of pregnant smokers quit during pregnancy, but 50% return to smoking postpartum. The primary barrier was time limitations. Compared with findings from a similar study conducted in 1998, physicians are less likely to adhere to the 5 As smoking cessation guideline at present.                                                                                                                                                                                                                                                                                                                                                                                                                                                                                                                        |
| Condliffe (2005) USA      | Health Providers (Midwives Grandes E-H, Health Care Assistants)                       | Low risk | Explore the self-reported smoking-cessation interventions of maternity staff with pregnant smokers and their attitudes towards smoking in pregnancy.                                                                                        |   | X | X |   | X |     | Over two-thirds of respondents (71%) reported not advising any pregnant women to give up smoking within the previous 7 days. However, 64% felt women should not make up their own minds about whether to smoke during pregnancy, and 81% agreed/strongly agreed that many pregnant women would like to give up smoking but need help and advice on how to succeed. Helping a pregnant woman to give up smoking was seen as being one of the most important things a midwife can do by 73% of the respondents. Although the reported attitudes were supportive of the midwife's role in smoking cessation, they did not translate into practice. The level of smoking cessation interventions was low.                                                                                                                                                  |
| Cooke (1996) Australia    | Health Providers (Midwives)                                                           | Low risk | Assess current practice in smoking cessation interventions by midwives and to examine the relationship between the use of smoking interventions, practitioner's characteristics, and organisational factors.                                | X | X |   | X | X |     | Most midwives used minimal interventions (advice and education) for at least some of their clients. The more skilled and more time-intensive forms of intervention (e.g., counselling, negotiating a quit date, and follow-up) were infrequently utilized. Participants estimated that half their smoking clients were not offered advice about smoking. Organizational factors such as: hospital policy for smoking intervention, type of hospital, size of hospital, cohesion of staff and work pressure predicted the use of smoking interventions. Self-reported ability to intervene for smoking and the level of assessment undertaken were practitioner characteristics which predicted the use of smoking interventions. The barriers that inhibit the use of smoking intervention by midwives are discussed and methods for change canvassed. |
| Cooke (1998) Australia    | Health Providers (Midwives, Doctors: Obstetric Specialists, Registrars and Residents) | Low risk | The aims of the study were to describe the smoking intervention practice of antenatal clinic staff, and to ascertain the organizational and practitioner variables which predict clinician use of smoking interventions.                    | X | X |   | X | X |     | Most antenatal clinic staff did not use the most effective forms of brief interventions for smoking. The presence of specific procedures and training in smoking cessation intervention appeared to be the most important predictors of reported smoking intervention in hospital antenatal clinics.                                                                                                                                                                                                                                                                                                                                                                                                                                                                                                                                                   |
| Eiser (1999) UK           | Health Providers (Midwives)                                                           | Low risk | Assess a) their attitudes to giving anti-smoking advice to pregnant smokers and whether they perceived this as part of their professional role and b) the types of advice they gave to pregnant smokers as part of their routine practices. | X | X | X | X |   |     | Midwives attitudes towards giving anti-smoking advice were generally positive, and almost all reported routinely explaining the health dangers of smoking to pregnant smokers. Among midwives who had never smoked, those who held role attitudes that were more favourable towards anti-smoking intervention reported providing relatively more advice based on warnings of health consequences and an emphasis on abstinence. Among the remainder of the sample, more favourable attitudes predicted greater use of behaviourally-oriented advice to facilitate cessation or smoking reduction, but were unrelated to the use of health warnings and emphasis on abstinence.                                                                                                                                                                         |
| England (2014) USA        | Health Providers (Obstetrician-                                                       | Low risk | Examine screening practices and attitudes of obstetricians-                                                                                                                                                                                 |   |   |   |   |   | NA* | A substantial proportion of obstetrician-gynaecologists reported never or inconsistently screening their pregnant patients for the use of non-combustible tobacco products.                                                                                                                                                                                                                                                                                                                                                                                                                                                                                                                                                                                                                                                                            |

|  |                      |                                                                                                                      |          |                                                                                                                                                                                                                                                                |   |   |   |   |   |   |                                                                                                                                                                                                                                                                                                                                                                                                     |
|--|----------------------|----------------------------------------------------------------------------------------------------------------------|----------|----------------------------------------------------------------------------------------------------------------------------------------------------------------------------------------------------------------------------------------------------------------|---|---|---|---|---|---|-----------------------------------------------------------------------------------------------------------------------------------------------------------------------------------------------------------------------------------------------------------------------------------------------------------------------------------------------------------------------------------------------------|
|  |                      | Gynaecologist Physicians)                                                                                            |          | gynaecologists toward new and emerging tobacco products.                                                                                                                                                                                                       |   |   |   |   |   |   | Responses regarding the harms of these products relative to cigarettes were mixed and most respondents wanted more information.                                                                                                                                                                                                                                                                     |
|  | Floyd (2001) USA     | Health Providers (Obstetric-Gynaecologists)                                                                          | Low risk | Assess the knowledge, beliefs and practice behaviours of obstetricians/gynaecologists concerning their patients prenatal use of tobacco and other drugs.                                                                                                       | X | X |   | X | X | X | While screening of prenatal patients for tobacco use and other drug use was reported by survey respondents, providing or arranging for interventions for those screening positives was less often reported.                                                                                                                                                                                         |
|  | Glover (2008) NZ     | Health Providers (GPs, Registered Midwives)                                                                          | Low risk | To examine New Zealand general practitioners' GP and midwives' smoking cessation knowledge and support offered to pregnant women who smoke.                                                                                                                    | X | X | X | X | X | X | GPs are in the ideal position to offer stop-smoking advice, because they usually confirm pregnancy. GPs are most likely to advocate stopping smoking completely; midwives are more likely to advocate cutting down with a view to quitting. Both GPs and midwives would benefit from improved knowledge of the full range of nicotine replacement therapy (NRT).                                    |
|  | Grange (2006) France | Pregnant Women                                                                                                       | Low risk | To describe the management of tobacco withdrawal in pregnant women.                                                                                                                                                                                            | X | X | X | X |   |   | Healthcare professionals seems to offer only rudimentary care. Simple strategies to help women give up smoking are required. The partner is an important target, especially if he can be persuaded to give up at the same time.                                                                                                                                                                     |
|  | Grimley (2001) USA   | Health Providers (Obstetrician & Gynaecologists)                                                                     | Low risk | To determine the adherence to the clinical guidelines for smoking cessation among Ob-gyn physicians within Alabama.                                                                                                                                            | X | X | X | X | X | X | Interventions are needed to motivate, support, and guide OB-GYN physicians to assist and follow-up with their pregnant patients who smoke.                                                                                                                                                                                                                                                          |
|  | Hartmann (2007) USA  | Health Providers (Obstetricians, Midwives, Family Medicine Physicians, Nurse Practitioners and Physician Assistants) | Low risk | To measure the use of best practice intervention including each of the 5 A's and to assess the relationship between best practice and current intervention resources, prior training in smoking cessation intervention and barriers to providing intervention. | X | X | X | X | X | X | Best practice is well-established to promote prenatal smoking cessation yet implemented by only one third of prenatal care providers in North Carolina. In this study, best practice was associated with resources, practice organization, and reimbursement. Augmented use of available resources (e.g., toll-free hot-lines) and adequate reimbursement may promote best practice implementation. |
|  | Helwig (1998) USA    | Health Providers (Obstetricians, Family Physicians, Midwives)                                                        | Low risk | Investigate the usual intervention practices of family physicians, obstetricians, and nurse midwives for their patients who smoke.                                                                                                                             | X |   |   | X | X | X | Maternity care providers underutilize effective methods of smoking cessation for their patients who smoke and rely on less effective methods.                                                                                                                                                                                                                                                       |
|  | Herbert (2005) UK    | Health Providers (GPs)                                                                                               | Low risk | Determine a). General practitioners' confidence in their ability to deliver a range of smoking cessation interventions, including                                                                                                                              |   | X |   |   | X | X | Most general practitioners (62%) believed NRT to be effective in pregnancy and safer than smoking (70%), but fewer (45%) believed NRT to be safe in pregnancy. GPs who believed NRT use in pregnancy was safer than smoking were most likely to recall having prescribed it. Many general practitioners were unsure about the safety of NRT in                                                      |

1  
2  
3  
4  
5  
6  
7  
8  
9  
10  
11  
12  
13  
14  
15  
16  
17  
18  
19  
20  
21  
22  
23  
24  
25  
26  
27  
28  
29  
30  
31  
32  
33  
34  
35  
36  
37  
38  
39  
40  
41  
42  
43  
44  
45  
46

NRT in pregnancy, b). the frequency with which general practitioners recall prescribing NRT in pregnancy and c). The factors that influence general practitioners to prescribe NRT in pregnancy.

pregnancy. The key factor influencing general practitioners' prescribing decisions was a belief that NRT use in pregnancy was likely to be safer than smoking.

|                           |                                      |                                       |                                                                                                                                                                                                                                                                                                                                          |   |   |   |   |   |                                                                                                                                                                                                                                                                                                                                                                                                                                                                                                                                                                                                                                                                                                                                                                                                                                                                                                                    |
|---------------------------|--------------------------------------|---------------------------------------|------------------------------------------------------------------------------------------------------------------------------------------------------------------------------------------------------------------------------------------------------------------------------------------------------------------------------------------|---|---|---|---|---|--------------------------------------------------------------------------------------------------------------------------------------------------------------------------------------------------------------------------------------------------------------------------------------------------------------------------------------------------------------------------------------------------------------------------------------------------------------------------------------------------------------------------------------------------------------------------------------------------------------------------------------------------------------------------------------------------------------------------------------------------------------------------------------------------------------------------------------------------------------------------------------------------------------------|
| Hickner (1990) USA        | Health Providers (Family Physicians) | Low risk                              | Reports practitioner's attitudes and strategies towards antismoking interventions for pregnant smokers.                                                                                                                                                                                                                                  | X | X | X | X | X | Most physicians routinely assessed smoking status at the first prenatal visit, and advised pregnant smokers to quit smoking during pregnancy. The most frequently used method of intervention was personal counselling (97%), referral to smoking cessation clinics (40%), and behaviour modification (20%). Fifty-seven percent of physicians reported using antismoking pamphlets, and 30% used antismoking posters. 97% were convinced that the benefits of smoking cessation during pregnancy merited their efforts.                                                                                                                                                                                                                                                                                                                                                                                           |
| Hoekzema (2014) Australia | Pregnant Women                       | Low risk                              | To characterise pregnant smokers and to understand their smoking behaviours and preferences for smoking cessation. The specific objectives were to study the smoking patterns, smoking cessation and treatment preferences of pregnant women and to investigate the scope for a smoking cessation program in the antenatal settings.     |   | X |   | X | X | There were 87 (69.6%) daily smokers and 38 (30.4%) occasional smokers. Smokers mainly had medium (54; 43.2%) or heavy nicotine dependence (45; 36%). Current smokers were younger, Australian born, not living with a partner, from a lower socio-economic background, multigravida and had a smoker in their household or among friends. Although pregnant smokers were aware of the possible complications of smoking, their motivation and confidence to quit (median) on a 10-point scale were 7 and 4, respectively. Most smokers preferred to stop smoking gradually (74; 71.2%). The preferred methods for quitting were medications (49; 47.6%) and hypnotherapy (35; 34.0%). Patches (28; 29.5%) were the preferred dosage form, and nicotine replacement therapy (25; 28.1%) was the preferred medication. Less than half reported that their health professionals discouraged smoking during pregnancy. |
| Howard (2013) UK          | Pregnant Women                       | High risk – women with mental illness | Investigate whether pregnant women with mental disorders: a). Are less likely to accept referrals to smoking cessation services, b) are less likely to stop smoking by delivery, and c). Differ in their experiences of smoking, smoking cessation and smoking cessation services compared with pregnant women without mental disorders. |   |   | X |   | X | Pregnant women with mental disorders appear more motivated, yet find it more difficult, to stop smoking. Prioritisation of mental health over smoking may thus lead to increasing health inequality for this group.                                                                                                                                                                                                                                                                                                                                                                                                                                                                                                                                                                                                                                                                                                |
| Jones (2003)              | Pregnant Women &                     | Low risk                              | Explore the attitudes of midwives and pregnant                                                                                                                                                                                                                                                                                           |   | X |   | X |   | Only 45% of midwives offered smoking cessation advice routinely, although 82% felt it should be a part of the antenatal care (82%). Lack of time (66%) and training (54%) were                                                                                                                                                                                                                                                                                                                                                                                                                                                                                                                                                                                                                                                                                                                                     |

|    |                       |                                                               |          |                                                                                                                                                                                                                                               |   |   |   |   |   |   |  |                                                                                                                                                                                                                                                                                                                                                                                                                                                                                                                                                                                                                                                                                                                                                                                                             |
|----|-----------------------|---------------------------------------------------------------|----------|-----------------------------------------------------------------------------------------------------------------------------------------------------------------------------------------------------------------------------------------------|---|---|---|---|---|---|--|-------------------------------------------------------------------------------------------------------------------------------------------------------------------------------------------------------------------------------------------------------------------------------------------------------------------------------------------------------------------------------------------------------------------------------------------------------------------------------------------------------------------------------------------------------------------------------------------------------------------------------------------------------------------------------------------------------------------------------------------------------------------------------------------------------------|
| 1  |                       |                                                               |          |                                                                                                                                                                                                                                               |   |   |   |   |   |   |  |                                                                                                                                                                                                                                                                                                                                                                                                                                                                                                                                                                                                                                                                                                                                                                                                             |
| 2  |                       |                                                               |          |                                                                                                                                                                                                                                               |   |   |   |   |   |   |  |                                                                                                                                                                                                                                                                                                                                                                                                                                                                                                                                                                                                                                                                                                                                                                                                             |
| 3  | UK                    | Health Providers (Midwives)                                   |          | women towards smoking cessation advice to understand why it is not a routine part of antenatal care.                                                                                                                                          |   |   |   |   |   |   |  | the major reasons for this. Smoking cessation advice was not a priority for discussion among the midwives compared to topics such as antenatal screening or place of delivery. Women were aware of the dangers of smoking in pregnancy, but those who wanted to quit need more support from their midwives (83%). They ranked smoking cessation as a high priority for discussion at the antenatal visit. The midwives did not feel able to offer smoking cessation advice. The main reason being a of lack of time in the antenatal clinic.                                                                                                                                                                                                                                                                |
| 4  |                       |                                                               |          |                                                                                                                                                                                                                                               |   |   |   |   |   |   |  |                                                                                                                                                                                                                                                                                                                                                                                                                                                                                                                                                                                                                                                                                                                                                                                                             |
| 5  |                       |                                                               |          |                                                                                                                                                                                                                                               |   |   |   |   |   |   |  |                                                                                                                                                                                                                                                                                                                                                                                                                                                                                                                                                                                                                                                                                                                                                                                                             |
| 6  |                       |                                                               |          |                                                                                                                                                                                                                                               |   |   |   |   |   |   |  |                                                                                                                                                                                                                                                                                                                                                                                                                                                                                                                                                                                                                                                                                                                                                                                                             |
| 7  |                       |                                                               |          |                                                                                                                                                                                                                                               |   |   |   |   |   |   |  |                                                                                                                                                                                                                                                                                                                                                                                                                                                                                                                                                                                                                                                                                                                                                                                                             |
| 8  | Jordan (2006)         | Health Providers (Obstetricians, Gynaecologist)               | Low risk | To assess Ohio obstetrician/gynaecologists' perceptions and use of the 5A's methods of smoking cessation with pregnant patients who smoking.                                                                                                  | X | X | X | X | X | X |  | Obstetrician/gynaecologists face many competing demands for their time and energy, yet 62% believed smoking cessation advice would be of significant value. Physicians with higher levels of efficacy expectations reported significantly greater use of the 5 As. Future research should explore ways to facilitate obstetrician/gynaecologists' use of the 5As method.                                                                                                                                                                                                                                                                                                                                                                                                                                    |
| 9  | USA                   |                                                               |          |                                                                                                                                                                                                                                               |   |   |   |   |   |   |  |                                                                                                                                                                                                                                                                                                                                                                                                                                                                                                                                                                                                                                                                                                                                                                                                             |
| 10 |                       |                                                               |          |                                                                                                                                                                                                                                               |   |   |   |   |   |   |  |                                                                                                                                                                                                                                                                                                                                                                                                                                                                                                                                                                                                                                                                                                                                                                                                             |
| 11 | Lemola (2012)         | Health Providers (Gynaecologists, Midwives)                   | Low risk | Examined whether gynaecologists and midwives engage in screening and counselling of pregnant women and conducting interventions to prevent smoking during pregnancy. Examine control beliefs involving efficacy expectations of practitioner. | X | X |   |   |   | X |  | Most gynaecologists and midwives reported screening all pregnant patients regarding smoking, explaining the risks and recommending smoking cessation. By contrast, only a minority engages in more extensive prevention efforts. Strong control beliefs were predictive of a higher likelihood of screening and counselling, as well as of engaging in more extensive interventions.                                                                                                                                                                                                                                                                                                                                                                                                                        |
| 12 |                       |                                                               |          |                                                                                                                                                                                                                                               |   |   |   |   |   |   |  |                                                                                                                                                                                                                                                                                                                                                                                                                                                                                                                                                                                                                                                                                                                                                                                                             |
| 13 |                       |                                                               |          |                                                                                                                                                                                                                                               |   |   |   |   |   |   |  |                                                                                                                                                                                                                                                                                                                                                                                                                                                                                                                                                                                                                                                                                                                                                                                                             |
| 14 |                       |                                                               |          |                                                                                                                                                                                                                                               |   |   |   |   |   |   |  |                                                                                                                                                                                                                                                                                                                                                                                                                                                                                                                                                                                                                                                                                                                                                                                                             |
| 15 |                       |                                                               |          |                                                                                                                                                                                                                                               |   |   |   |   |   |   |  |                                                                                                                                                                                                                                                                                                                                                                                                                                                                                                                                                                                                                                                                                                                                                                                                             |
| 16 |                       |                                                               |          |                                                                                                                                                                                                                                               |   |   |   |   |   |   |  |                                                                                                                                                                                                                                                                                                                                                                                                                                                                                                                                                                                                                                                                                                                                                                                                             |
| 17 |                       |                                                               |          |                                                                                                                                                                                                                                               |   |   |   |   |   |   |  |                                                                                                                                                                                                                                                                                                                                                                                                                                                                                                                                                                                                                                                                                                                                                                                                             |
| 18 |                       |                                                               |          |                                                                                                                                                                                                                                               |   |   |   |   |   |   |  |                                                                                                                                                                                                                                                                                                                                                                                                                                                                                                                                                                                                                                                                                                                                                                                                             |
| 19 |                       |                                                               |          |                                                                                                                                                                                                                                               |   |   |   |   |   |   |  |                                                                                                                                                                                                                                                                                                                                                                                                                                                                                                                                                                                                                                                                                                                                                                                                             |
| 20 |                       |                                                               |          |                                                                                                                                                                                                                                               |   |   |   |   |   |   |  |                                                                                                                                                                                                                                                                                                                                                                                                                                                                                                                                                                                                                                                                                                                                                                                                             |
| 21 |                       |                                                               |          |                                                                                                                                                                                                                                               |   |   |   |   |   |   |  |                                                                                                                                                                                                                                                                                                                                                                                                                                                                                                                                                                                                                                                                                                                                                                                                             |
| 22 | Mabbutt (2002)        | Pregnant Women                                                | Low risk | To examine substance use among pregnant women and their partners, to record changes in reported substance use during pregnancy and to determine what advice they received to stop smoking.                                                    |   | X |   |   |   |   |  | Routine advice to quit smoking was not the norm for this group who were motivated to attend antenatal classes and possibly more likely to act on quit smoking advice. Of the women and men who did receive advice to quit smoking, the majority of this advice was not from a health professional. Routine advice about quitting smoking should be a mandatory part of antenatal care, especially for disadvantaged groups, where smoking rates are higher. The antenatal setting accesses most pregnant women and provides a population base for comprehensive anti-smoking strategies for them and for their partners. Failure to implement such strategies would be to miss the opportunity for a cost-effective and disseminable public health intervention for pregnant women and their male partners. |
| 23 | Australia             |                                                               |          |                                                                                                                                                                                                                                               |   |   |   |   |   |   |  |                                                                                                                                                                                                                                                                                                                                                                                                                                                                                                                                                                                                                                                                                                                                                                                                             |
| 24 |                       |                                                               |          |                                                                                                                                                                                                                                               |   |   |   |   |   |   |  |                                                                                                                                                                                                                                                                                                                                                                                                                                                                                                                                                                                                                                                                                                                                                                                                             |
| 25 |                       |                                                               |          |                                                                                                                                                                                                                                               |   |   |   |   |   |   |  |                                                                                                                                                                                                                                                                                                                                                                                                                                                                                                                                                                                                                                                                                                                                                                                                             |
| 26 |                       |                                                               |          |                                                                                                                                                                                                                                               |   |   |   |   |   |   |  |                                                                                                                                                                                                                                                                                                                                                                                                                                                                                                                                                                                                                                                                                                                                                                                                             |
| 27 |                       |                                                               |          |                                                                                                                                                                                                                                               |   |   |   |   |   |   |  |                                                                                                                                                                                                                                                                                                                                                                                                                                                                                                                                                                                                                                                                                                                                                                                                             |
| 28 |                       |                                                               |          |                                                                                                                                                                                                                                               |   |   |   |   |   |   |  |                                                                                                                                                                                                                                                                                                                                                                                                                                                                                                                                                                                                                                                                                                                                                                                                             |
| 29 |                       |                                                               |          |                                                                                                                                                                                                                                               |   |   |   |   |   |   |  |                                                                                                                                                                                                                                                                                                                                                                                                                                                                                                                                                                                                                                                                                                                                                                                                             |
| 30 | McEwen (2003)         | Health Providers (GPs)                                        | Low risk | Investigate methods of early referral of pregnant smokers.                                                                                                                                                                                    | X |   |   |   |   | X |  | From a total of 55 GPs, in 17 practices within a deprived area of South West London, according to predictions from the delivery figures for the previous year, approximately 120 pregnant smokers should be identified within the 9-month period that the study took place. GPs were invited to use whatever form of referral was most convenient to them. Only 8 referrals were received.                                                                                                                                                                                                                                                                                                                                                                                                                  |
| 31 | UK                    |                                                               |          |                                                                                                                                                                                                                                               |   |   |   |   |   |   |  |                                                                                                                                                                                                                                                                                                                                                                                                                                                                                                                                                                                                                                                                                                                                                                                                             |
| 32 |                       |                                                               |          |                                                                                                                                                                                                                                               |   |   |   |   |   |   |  |                                                                                                                                                                                                                                                                                                                                                                                                                                                                                                                                                                                                                                                                                                                                                                                                             |
| 33 |                       |                                                               |          |                                                                                                                                                                                                                                               |   |   |   |   |   |   |  |                                                                                                                                                                                                                                                                                                                                                                                                                                                                                                                                                                                                                                                                                                                                                                                                             |
| 34 |                       |                                                               |          |                                                                                                                                                                                                                                               |   |   |   |   |   |   |  |                                                                                                                                                                                                                                                                                                                                                                                                                                                                                                                                                                                                                                                                                                                                                                                                             |
| 35 | Mejia (2010)          | HEALTH PROVIDERS (Obstetricians, Gynaecologists, & Residents) | Low risk | To describe physicians' practices of smoking cessation and second-hand smoke exposure counselling during prenatal visits.                                                                                                                     | X | X |   |   |   | X |  | Although 88.9% of practitioners always or almost always advised women to stop smoking, 75% believed it was acceptable for pregnant women to smoke up to 6 cigarettes per day. The risk of SHS exposure was 'always or almost always discussed' by only 34.5% of physicians. Multivariate logistic regression showed that lack of training was associated with less counselling about smoking cessation (OR 0.18; 95% CI 0.04-0.82) and SHS exposure (OR 0.27; 95% CI 0.12-0.59). Current compared to never smokers had lower odds of smoking cessation counselling (OR 0.39; 95% CI 0.05-0.82). Current                                                                                                                                                                                                     |
| 36 | Argentina and Uruguay |                                                               |          |                                                                                                                                                                                                                                               |   |   |   |   |   |   |  |                                                                                                                                                                                                                                                                                                                                                                                                                                                                                                                                                                                                                                                                                                                                                                                                             |
| 37 |                       |                                                               |          |                                                                                                                                                                                                                                               |   |   |   |   |   |   |  |                                                                                                                                                                                                                                                                                                                                                                                                                                                                                                                                                                                                                                                                                                                                                                                                             |
| 38 |                       |                                                               |          |                                                                                                                                                                                                                                               |   |   |   |   |   |   |  |                                                                                                                                                                                                                                                                                                                                                                                                                                                                                                                                                                                                                                                                                                                                                                                                             |
| 39 |                       |                                                               |          |                                                                                                                                                                                                                                               |   |   |   |   |   |   |  |                                                                                                                                                                                                                                                                                                                                                                                                                                                                                                                                                                                                                                                                                                                                                                                                             |
| 40 |                       |                                                               |          |                                                                                                                                                                                                                                               |   |   |   |   |   |   |  |                                                                                                                                                                                                                                                                                                                                                                                                                                                                                                                                                                                                                                                                                                                                                                                                             |
| 41 |                       |                                                               |          |                                                                                                                                                                                                                                               |   |   |   |   |   |   |  |                                                                                                                                                                                                                                                                                                                                                                                                                                                                                                                                                                                                                                                                                                                                                                                                             |
| 42 |                       |                                                               |          |                                                                                                                                                                                                                                               |   |   |   |   |   |   |  |                                                                                                                                                                                                                                                                                                                                                                                                                                                                                                                                                                                                                                                                                                                                                                                                             |
| 43 |                       |                                                               |          |                                                                                                                                                                                                                                               |   |   |   |   |   |   |  |                                                                                                                                                                                                                                                                                                                                                                                                                                                                                                                                                                                                                                                                                                                                                                                                             |
| 44 |                       |                                                               |          |                                                                                                                                                                                                                                               |   |   |   |   |   |   |  |                                                                                                                                                                                                                                                                                                                                                                                                                                                                                                                                                                                                                                                                                                                                                                                                             |
| 45 |                       |                                                               |          |                                                                                                                                                                                                                                               |   |   |   |   |   |   |  |                                                                                                                                                                                                                                                                                                                                                                                                                                                                                                                                                                                                                                                                                                                                                                                                             |
| 46 |                       |                                                               |          |                                                                                                                                                                                                                                               |   |   |   |   |   |   |  |                                                                                                                                                                                                                                                                                                                                                                                                                                                                                                                                                                                                                                                                                                                                                                                                             |



reported assessment of smoking. Optimal and assessment of smoking status.

|    |                         |                                                            |                                                        |                                                                                                                                                   |   |   |   |   |   |     |   |                                                                                                                                                                                                                                                                                                                                                                                                                                                                                                                                                                                                                                                                                                 |
|----|-------------------------|------------------------------------------------------------|--------------------------------------------------------|---------------------------------------------------------------------------------------------------------------------------------------------------|---|---|---|---|---|-----|---|-------------------------------------------------------------------------------------------------------------------------------------------------------------------------------------------------------------------------------------------------------------------------------------------------------------------------------------------------------------------------------------------------------------------------------------------------------------------------------------------------------------------------------------------------------------------------------------------------------------------------------------------------------------------------------------------------|
| 7  | Passey (2015) Australia | Pregnant Women                                             | High Risk-women Aboriginal and Torres Strait Islander  | Provision of antenatal smoking cessation support: A survey with pregnant Aboriginal and Torres Strait Islander women.                             | X | X |   | X |   |     |   | Despite most pregnant women who smoke reporting advice and support to quit, the persisting high prevalence of smoking suggests that this support is insufficient to overcome the many factors pushing women to smoke.                                                                                                                                                                                                                                                                                                                                                                                                                                                                           |
| 13 | Passey (2014) Australia | Health Providers (AHW, Midwives or Nurses, Doctors)        | High Risk-women: Aboriginal and Torres Strait Islander | Supporting pregnant Aboriginal and Torres Strait Islander women to quit smoking: views of antenatal care providers and pregnant indigenous women. |   |   |   |   |   | NA* |   | Current smokers (n = 121) were less positive about the potential effectiveness of most of the 12 strategies than the providers (n = 127). For example, family support was considered helpful by 64 % of smokers and 91 % of providers; between 56 and 62 % of smokers considered advice and support from midwives, doctors or Aboriginal Health Workers likely to be helpful, compared to 85-90 % of providers. Rewards for quitting were considered helpful by 63 % of smokers and 56 % of providers, with smokers rating them more highly and providers rating them lower, than most other strategies. Quitline was least popular for both.                                                   |
| 20 | Price (2006) USA        | Health Providers (Nurse-Midwives)                          | Low risk                                               | Perceptions and Use of Smoking Cessation in Nurse-Midwives' Practice.                                                                             | X | X | X | X | X | X   |   | Few nurse-midwives identified barriers to counselling pregnant patients who smoked, but the most common were lack of time (14%) and not knowing where to send pregnant smokers for treatment (14%). Most respondents believed that nicotine replacement therapy (NRT) would be most likely to reduce the number of pregnant smokers (74%), yet few (26%) were confident in their ability to prescribe/recommend nicotine replacement therapy. Respondents more likely to use 5 A's can be characterized as the following: had higher efficacy expectations in their ability to communicate issues about the 5 A's and had higher outcome expectations regarding the effects of using the 5 A's. |
| 27 | Price (2006) USA        | Health Providers (Obstetricians, Gynaecologists)           | Low risk                                               | Obstetricians and gynaecologists' perceptions and use of nicotine replacement therapy.                                                            | X | X | X | X | X | X   |   | The majority did not prescribe NRT possibly because few respondents received cigarette smoking cessation training in medical school or their residencies. Significant revisions in professional training and more continuing medical education are needed regarding smoking cessation and use of NRT.                                                                                                                                                                                                                                                                                                                                                                                           |
| 30 | Pullon (2004) NZ        | Health Providers (GPs Practicing Obstetrics, Midwives)     | Low risk                                               | Smoking cessation and nicotine replacement therapy in current primary maternity care.                                                             | X | X |   |   |   |     | X | Only about half of the health professional gave smoking cessation advice to most pregnant women who smoked. They were uncertain about the safety of NRT use in pregnant and breastfeeding women. Most respondents requested more information about NRT use.                                                                                                                                                                                                                                                                                                                                                                                                                                     |
| 34 | Roske (2009) Germany    | Health Providers (Midwives, Gynaecologists, Paediatrician) | Low risk                                               | Smoking cessation counselling for pregnant and postpartum women among midwives, gynaecologists and paediatricians in Germany.                     | X | X |   |   | X |     |   | Depending on profession, 90 % to 100 % see smoking cessation counselling as their assignment, 17 % to 80 % screen for, 48 % to 90 % document smoking status, and 55 % to 76 % offer brief or extensive counselling. 61 % to 87 % consider training to enhance their knowledge and/or counselling skills necessary. The compliance of providers with the necessity to give support in smoking cessation is very high. However, the status of cessation counselling does not sufficiently correspond to the evidence based requirements.                                                                                                                                                          |
| 39 | Solberg (2010)          | Pregnant Women                                             | Low risk                                               | Disparities in tobacco cessation medication orders                                                                                                |   |   |   |   | X |     | X | 32,733 current users of tobacco, 18,047 of whom had both health insurance and pharmacy claims data available. After adjustment, 15.4% overall had received an order for cessation                                                                                                                                                                                                                                                                                                                                                                                                                                                                                                               |

|    |                           |                                                            |                            |                                                                                                                                                                                                            |   |   |  |   |   |                                                                                                                                                                                                                                                                                                                                                                                                                                                                                                                                                                                                                                                                                           |
|----|---------------------------|------------------------------------------------------------|----------------------------|------------------------------------------------------------------------------------------------------------------------------------------------------------------------------------------------------------|---|---|--|---|---|-------------------------------------------------------------------------------------------------------------------------------------------------------------------------------------------------------------------------------------------------------------------------------------------------------------------------------------------------------------------------------------------------------------------------------------------------------------------------------------------------------------------------------------------------------------------------------------------------------------------------------------------------------------------------------------------|
| 1  |                           |                                                            |                            |                                                                                                                                                                                                            |   |   |  |   |   |                                                                                                                                                                                                                                                                                                                                                                                                                                                                                                                                                                                                                                                                                           |
| 2  |                           |                                                            |                            |                                                                                                                                                                                                            |   |   |  |   |   |                                                                                                                                                                                                                                                                                                                                                                                                                                                                                                                                                                                                                                                                                           |
| 3  | USA                       |                                                            |                            | and fills among special populations.                                                                                                                                                                       |   |   |  |   |   | medications during this year, but only 78% had filled it. Groups receiving fewer orders than their comparison groups were aged 18-34 years or older than 65 years, men, pregnant women, Asians and Hispanics, and those with non-English-language preference, on Medicaid, or with fewer visits. The same groups were less likely to fill that prescription, except patients with non-English preference or Medicaid. There are disparities in both the receipt of cessation medication orders and the likelihood of filling them for some special populations. The causes are likely to be complex, but this information provides a starting point for learning to improve this problem. |
| 4  |                           |                                                            |                            |                                                                                                                                                                                                            |   |   |  |   |   |                                                                                                                                                                                                                                                                                                                                                                                                                                                                                                                                                                                                                                                                                           |
| 5  |                           |                                                            |                            |                                                                                                                                                                                                            |   |   |  |   |   |                                                                                                                                                                                                                                                                                                                                                                                                                                                                                                                                                                                                                                                                                           |
| 6  |                           |                                                            |                            |                                                                                                                                                                                                            |   |   |  |   |   |                                                                                                                                                                                                                                                                                                                                                                                                                                                                                                                                                                                                                                                                                           |
| 7  |                           |                                                            |                            |                                                                                                                                                                                                            |   |   |  |   |   |                                                                                                                                                                                                                                                                                                                                                                                                                                                                                                                                                                                                                                                                                           |
| 8  |                           |                                                            |                            |                                                                                                                                                                                                            |   |   |  |   |   |                                                                                                                                                                                                                                                                                                                                                                                                                                                                                                                                                                                                                                                                                           |
| 9  |                           |                                                            |                            |                                                                                                                                                                                                            |   |   |  |   |   |                                                                                                                                                                                                                                                                                                                                                                                                                                                                                                                                                                                                                                                                                           |
| 10 | Tappin (2010) UK          | NA                                                         | Low risk                   | To establish a denominator for pregnant smokers in Scotland and describe the proportion who are referred to specialist services, engage in one-to-one counselling, set a quit date and quit 4 weeks later. | X |   |  | X |   | Poor smoking cessation outcomes are a product of current limitations to identification, referral, engagement and treatment. Carbon monoxide breath testing can bypass this difficulty of patient providing faulty information.                                                                                                                                                                                                                                                                                                                                                                                                                                                            |
| 11 |                           |                                                            |                            |                                                                                                                                                                                                            |   |   |  |   |   |                                                                                                                                                                                                                                                                                                                                                                                                                                                                                                                                                                                                                                                                                           |
| 12 |                           |                                                            |                            |                                                                                                                                                                                                            |   |   |  |   |   |                                                                                                                                                                                                                                                                                                                                                                                                                                                                                                                                                                                                                                                                                           |
| 13 |                           |                                                            |                            |                                                                                                                                                                                                            |   |   |  |   |   |                                                                                                                                                                                                                                                                                                                                                                                                                                                                                                                                                                                                                                                                                           |
| 14 |                           |                                                            |                            |                                                                                                                                                                                                            |   |   |  |   |   |                                                                                                                                                                                                                                                                                                                                                                                                                                                                                                                                                                                                                                                                                           |
| 15 |                           |                                                            |                            |                                                                                                                                                                                                            |   |   |  |   |   |                                                                                                                                                                                                                                                                                                                                                                                                                                                                                                                                                                                                                                                                                           |
| 16 |                           |                                                            |                            |                                                                                                                                                                                                            |   |   |  |   |   |                                                                                                                                                                                                                                                                                                                                                                                                                                                                                                                                                                                                                                                                                           |
| 17 | Thyrian (2006) Germany    | Health Providers (Midwives)                                | Low risk                   | To establish a denominator for pregnant smokers in Scotland and describe the proportion who are referred to specialist services, engage in one-to-one counselling, set a quit date and quit 4 weeks later. | X | X |  | X |   | Smoking and exposure to environmental tobacco smoke are seen as prominent health threats that midwives reported they addressed routinely, including giving advice to stop smoking.                                                                                                                                                                                                                                                                                                                                                                                                                                                                                                        |
| 18 |                           |                                                            |                            |                                                                                                                                                                                                            |   |   |  |   |   |                                                                                                                                                                                                                                                                                                                                                                                                                                                                                                                                                                                                                                                                                           |
| 19 |                           |                                                            |                            |                                                                                                                                                                                                            |   |   |  |   |   |                                                                                                                                                                                                                                                                                                                                                                                                                                                                                                                                                                                                                                                                                           |
| 20 |                           |                                                            |                            |                                                                                                                                                                                                            |   |   |  |   |   |                                                                                                                                                                                                                                                                                                                                                                                                                                                                                                                                                                                                                                                                                           |
| 21 |                           |                                                            |                            |                                                                                                                                                                                                            |   |   |  |   |   |                                                                                                                                                                                                                                                                                                                                                                                                                                                                                                                                                                                                                                                                                           |
| 22 |                           |                                                            |                            |                                                                                                                                                                                                            |   |   |  |   |   |                                                                                                                                                                                                                                                                                                                                                                                                                                                                                                                                                                                                                                                                                           |
| 23 |                           |                                                            |                            |                                                                                                                                                                                                            |   |   |  |   |   |                                                                                                                                                                                                                                                                                                                                                                                                                                                                                                                                                                                                                                                                                           |
| 24 | Tong (2008) USA           | Pregnant Women                                             | Low risk                   | Investigate the attitudes of midwives to counselling women about their smoking behaviour during pregnancy and post-partum.                                                                                 |   |   |  | X |   | Almost all women reported that their prenatal care provider asked if they smoked, but only 56.7% reported that a provider counselled them to quit smoking. Only 11.5% of women who smoked in late pregnancy used a cessation method, including self-help materials (6.3%); medications (3.9%); face-to-face counselling (1.7%); telephone-based counselling (1.5%); Internet-based counselling (1.3%); and a class or program (1.0%).                                                                                                                                                                                                                                                     |
| 25 |                           |                                                            |                            |                                                                                                                                                                                                            |   |   |  |   |   |                                                                                                                                                                                                                                                                                                                                                                                                                                                                                                                                                                                                                                                                                           |
| 26 |                           |                                                            |                            |                                                                                                                                                                                                            |   |   |  |   |   |                                                                                                                                                                                                                                                                                                                                                                                                                                                                                                                                                                                                                                                                                           |
| 27 |                           |                                                            |                            |                                                                                                                                                                                                            |   |   |  |   |   |                                                                                                                                                                                                                                                                                                                                                                                                                                                                                                                                                                                                                                                                                           |
| 28 | Tran (2010) USA           | Pregnant Women                                             | Low risk                   | To explore racial/ethnic disparities in the receipt of optimal smoking cessation counselling during prenatal care.                                                                                         | X | X |  | X |   | Of 594 first trimester pregnant smokers, the majority were asked and advised about smoking by a prenatal care provider. However, a substantial proportion of women did not receive assistance to quit and only 42.2% received all three steps. Significant racial/ethnic variations were found only in the Assist step. Compared to non-Hispanic (NH) White women, NH American Indian women had lower odds of receiving all three steps. In contrast, NH Black women had increased odds of receiving all three steps. We conclude that there is a need for prenatal care providers to address tobacco use, especially to Assist quitting, with all pregnant smokers.                      |
| 29 |                           |                                                            |                            |                                                                                                                                                                                                            |   |   |  |   |   |                                                                                                                                                                                                                                                                                                                                                                                                                                                                                                                                                                                                                                                                                           |
| 30 |                           |                                                            |                            |                                                                                                                                                                                                            |   |   |  |   |   |                                                                                                                                                                                                                                                                                                                                                                                                                                                                                                                                                                                                                                                                                           |
| 31 |                           |                                                            |                            |                                                                                                                                                                                                            |   |   |  |   |   |                                                                                                                                                                                                                                                                                                                                                                                                                                                                                                                                                                                                                                                                                           |
| 32 |                           |                                                            |                            |                                                                                                                                                                                                            |   |   |  |   |   |                                                                                                                                                                                                                                                                                                                                                                                                                                                                                                                                                                                                                                                                                           |
| 33 |                           |                                                            |                            |                                                                                                                                                                                                            |   |   |  |   |   |                                                                                                                                                                                                                                                                                                                                                                                                                                                                                                                                                                                                                                                                                           |
| 34 |                           |                                                            |                            |                                                                                                                                                                                                            |   |   |  |   |   |                                                                                                                                                                                                                                                                                                                                                                                                                                                                                                                                                                                                                                                                                           |
| 35 | Tzelepis (2017) Australia | Health Providers (AHW or Aboriginal Health Officers, Child | High Risk-women Aboriginal | To examine Aboriginal antenatal and postnatal staff confidence, perceived role and delivery of smoking cessation care to Aboriginal women and characteristics                                              | X |   |  | X | X | Most staff reported they assessed clients' smoking status most or all of the time (92.2%). However, only a minority reported they offered a Quitline referral (42.2%), provided follow-up support (28.6%) or provided nicotine replacement therapy (4.7%) to most or all clients who smoked. Few staff felt confident in motivating clients to quit smoking (19.7%) and advising clients about using nicotine replacement therapy (15.6%). Staff confident with talking to clients about how smoking affected their health had significantly higher odds of offering a Quitline referral and quitting assistance to clients who smoke.                                                    |
| 36 |                           |                                                            |                            |                                                                                                                                                                                                            |   |   |  |   |   |                                                                                                                                                                                                                                                                                                                                                                                                                                                                                                                                                                                                                                                                                           |
| 37 |                           |                                                            |                            |                                                                                                                                                                                                            |   |   |  |   |   |                                                                                                                                                                                                                                                                                                                                                                                                                                                                                                                                                                                                                                                                                           |
| 38 |                           |                                                            |                            |                                                                                                                                                                                                            |   |   |  |   |   |                                                                                                                                                                                                                                                                                                                                                                                                                                                                                                                                                                                                                                                                                           |
| 39 |                           |                                                            |                            |                                                                                                                                                                                                            |   |   |  |   |   |                                                                                                                                                                                                                                                                                                                                                                                                                                                                                                                                                                                                                                                                                           |
| 40 |                           |                                                            |                            |                                                                                                                                                                                                            |   |   |  |   |   |                                                                                                                                                                                                                                                                                                                                                                                                                                                                                                                                                                                                                                                                                           |
| 41 |                           |                                                            |                            |                                                                                                                                                                                                            |   |   |  |   |   |                                                                                                                                                                                                                                                                                                                                                                                                                                                                                                                                                                                                                                                                                           |
| 42 |                           |                                                            |                            |                                                                                                                                                                                                            |   |   |  |   |   |                                                                                                                                                                                                                                                                                                                                                                                                                                                                                                                                                                                                                                                                                           |
| 43 |                           |                                                            |                            |                                                                                                                                                                                                            |   |   |  |   |   |                                                                                                                                                                                                                                                                                                                                                                                                                                                                                                                                                                                                                                                                                           |
| 44 |                           |                                                            |                            |                                                                                                                                                                                                            |   |   |  |   |   |                                                                                                                                                                                                                                                                                                                                                                                                                                                                                                                                                                                                                                                                                           |
| 45 |                           |                                                            |                            |                                                                                                                                                                                                            |   |   |  |   |   |                                                                                                                                                                                                                                                                                                                                                                                                                                                                                                                                                                                                                                                                                           |
| 46 |                           |                                                            |                            |                                                                                                                                                                                                            |   |   |  |   |   |                                                                                                                                                                                                                                                                                                                                                                                                                                                                                                                                                                                                                                                                                           |



|                        |                                                                                                     |          |                                                                                                                                                                |   |   |   |   |   |   |                                                                                                                                                                                                                                                                                                                                                                                                                                                                                                                                                                                                            |
|------------------------|-----------------------------------------------------------------------------------------------------|----------|----------------------------------------------------------------------------------------------------------------------------------------------------------------|---|---|---|---|---|---|------------------------------------------------------------------------------------------------------------------------------------------------------------------------------------------------------------------------------------------------------------------------------------------------------------------------------------------------------------------------------------------------------------------------------------------------------------------------------------------------------------------------------------------------------------------------------------------------------------|
|                        | Health Nurses, & Midwives)                                                                          |          | associated with provision of such care.                                                                                                                        |   |   |   |   |   |   |                                                                                                                                                                                                                                                                                                                                                                                                                                                                                                                                                                                                            |
| Walsh (1995) Australia | Health Providers (Medical Directors & Nursing Directors)                                            | Low risk | To assess the smoking cessation practices of Australian public antenatal clinics.                                                                              | X |   | X | X |   |   | Smoking advice was rated an essential activity at the first antenatal visit by 69% of responding directors. Nonetheless, only 12% of clinics indicated they offered relevant training and 4% reported written policies. Results also indicate senior staff may have suboptimal levels of awareness of smoking risks. Clinics used a narrow array of strategies to promote cessation. Almost one-third of directors said they advised smokers to cut down rather than stop smoking completely.                                                                                                              |
| Zapka (2000) USA       | Health Providers (Physician, Nurse-Practitioner or Midwife, RN, Nutritionists, Nutrition Assistant) | Low risk | Assess providers' performance of smoking cessation counselling steps with low-income pregnant and postpartum women receiving care at community health centres. | X | X | X | X | X | X | Providers in obstetric clinics had the highest scores and those in paediatric clinics had the lowest scores. Nurse practitioners and nutritionists had higher scores than other providers. Clinic type, greater smoking-related knowledge, older age, and perception of smoking cessation as a priority were independently related to better counselling performance. Low scores for performance of steps beyond assessment and advice indicate a need for emphasis on the assistance and follow-up steps of national guidelines. Providers' own commitment to helping mothers stop smoking was important. |

NA – Not applicable to study or not described

Forest Plots 1-17



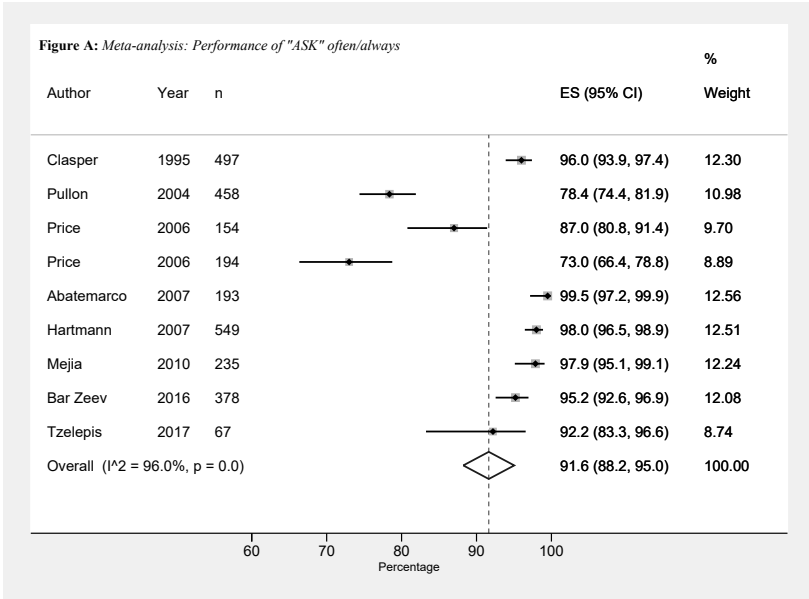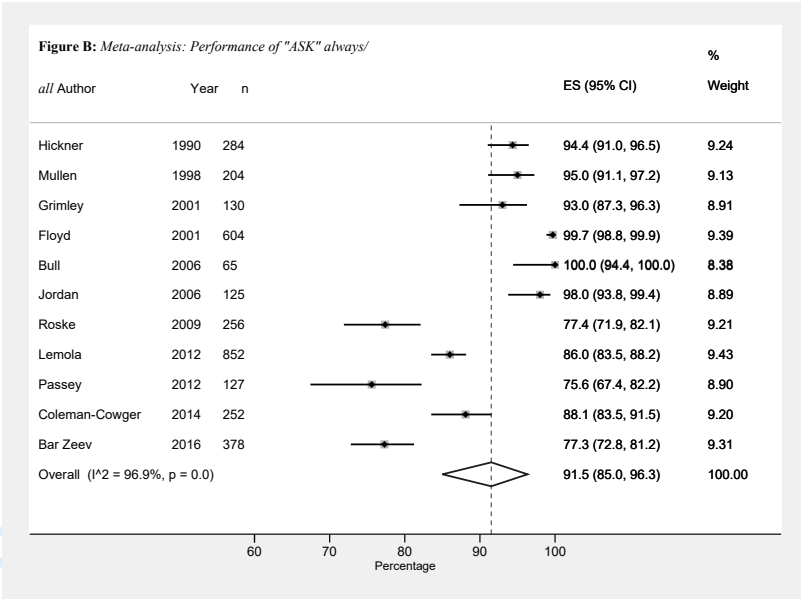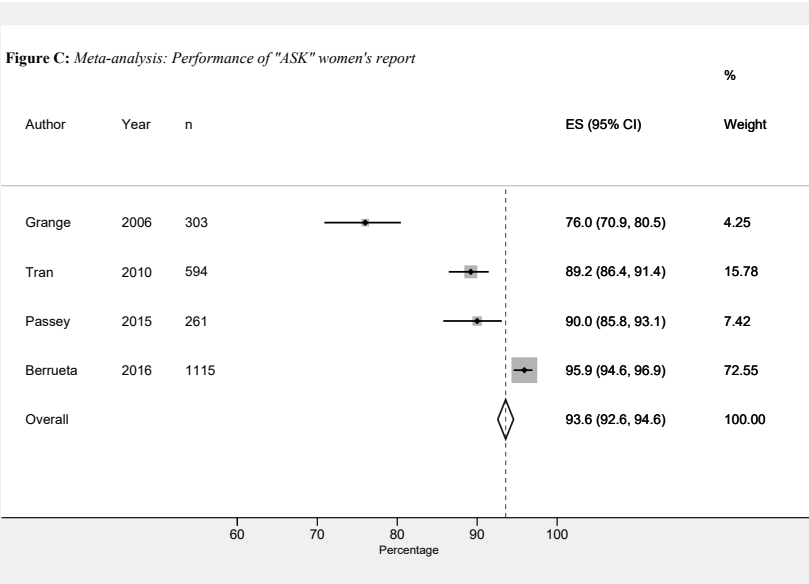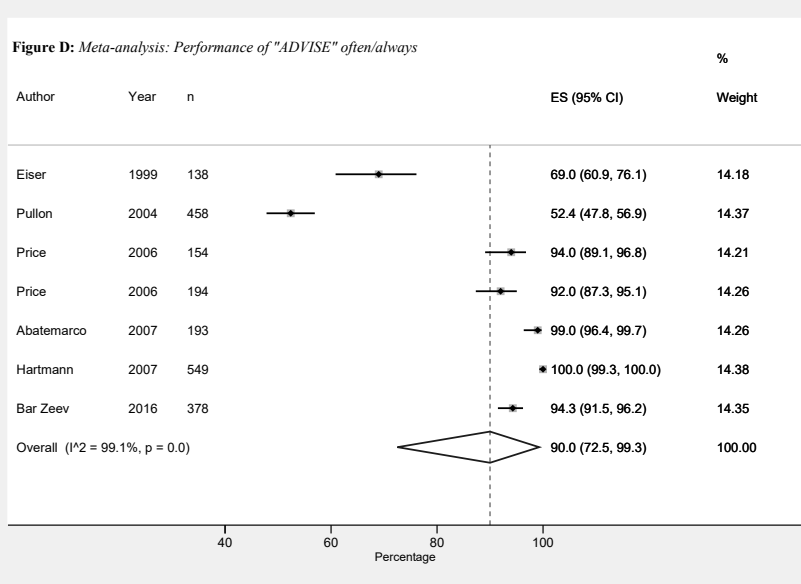

**Figure E:** Meta-analysis: Performance of "ADVISE" always/all

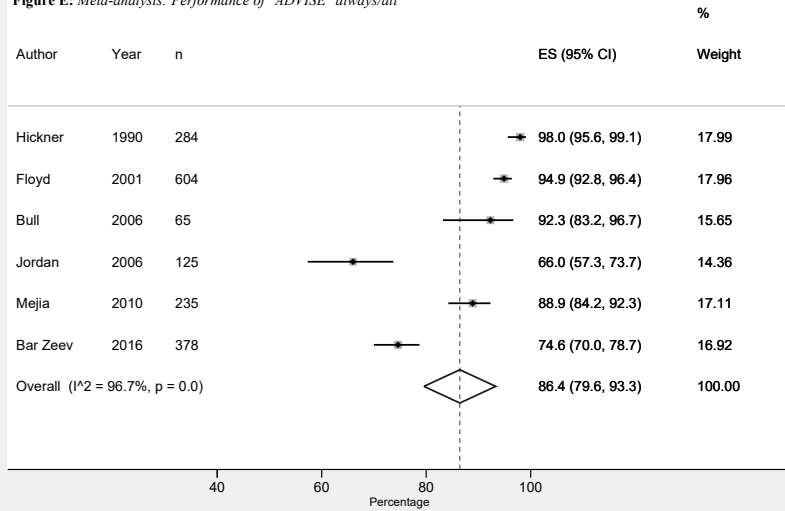

**Figure F:** Meta-analysis: Performance of "ADVISE" Yes

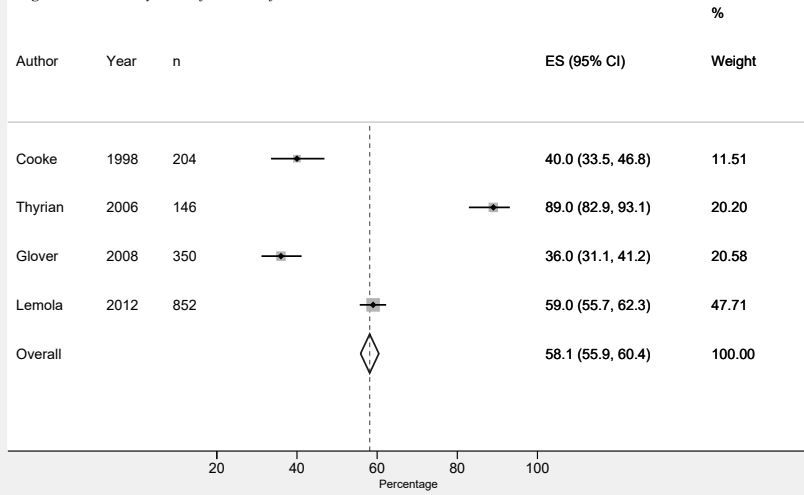

**Figure G:** Meta-analysis: Performance of "ADVISE" women's report

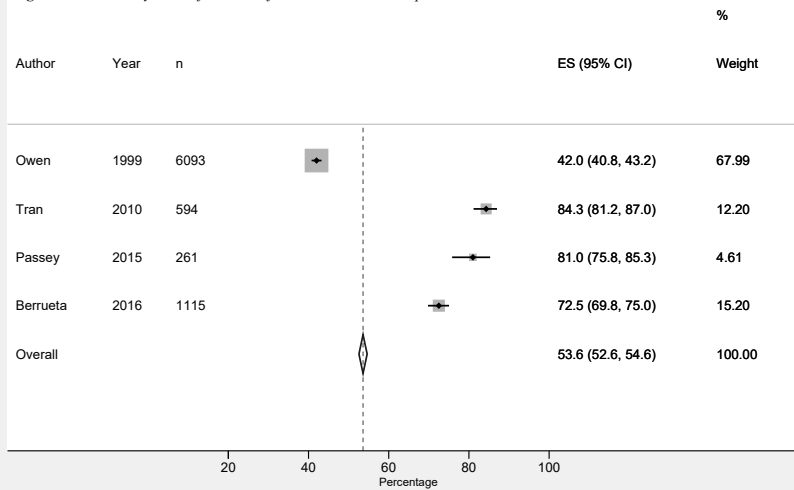

**Figure H:** Meta-analysis: Performance of "ASSESS" Motivation to quit often/always

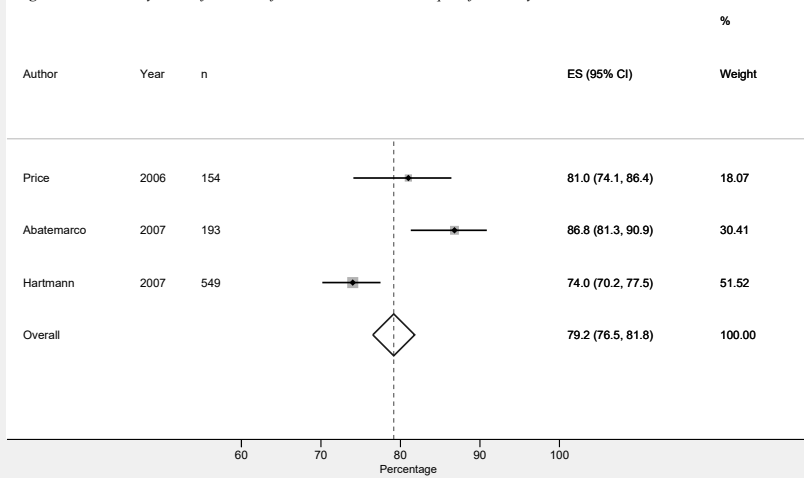

1  
2  
3  
4  
5  
6  
7  
8  
9  
10  
11  
12  
13  
14  
15  
16  
17  
18  
19  
20  
21  
22  
23  
24  
25  
26  
27  
28  
29  
30  
31  
32  
33  
34  
35  
36  
37  
38  
39  
40  
41  
42  
43  
44  
45  
46

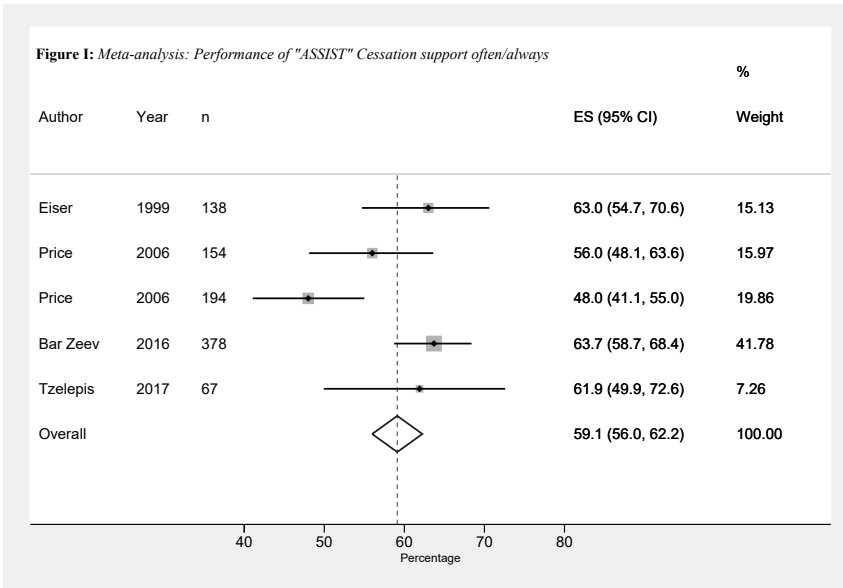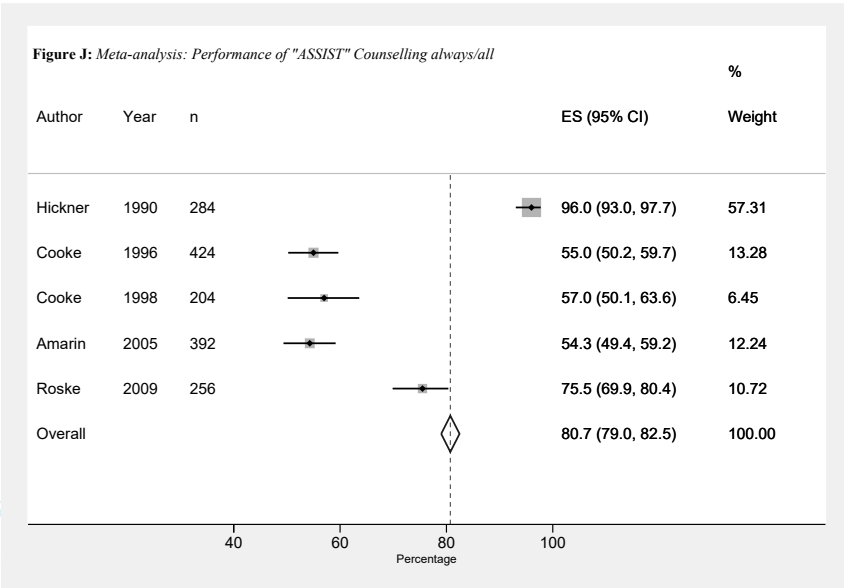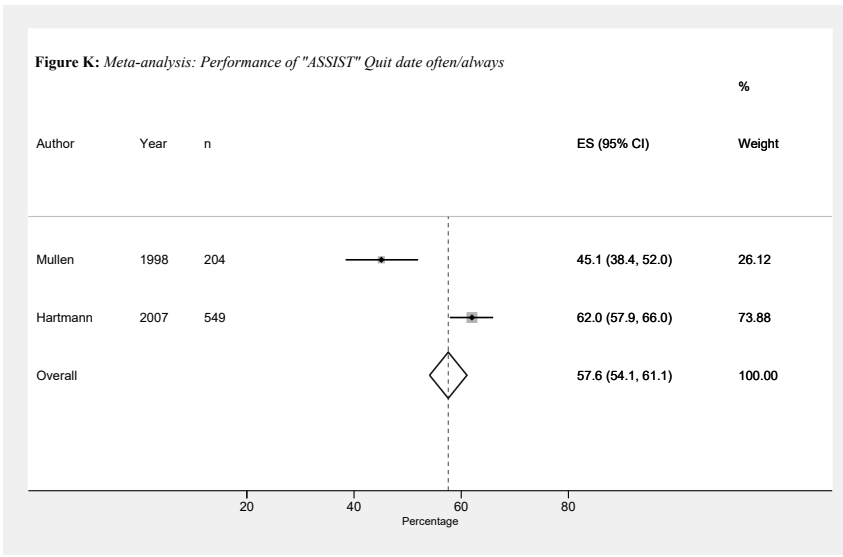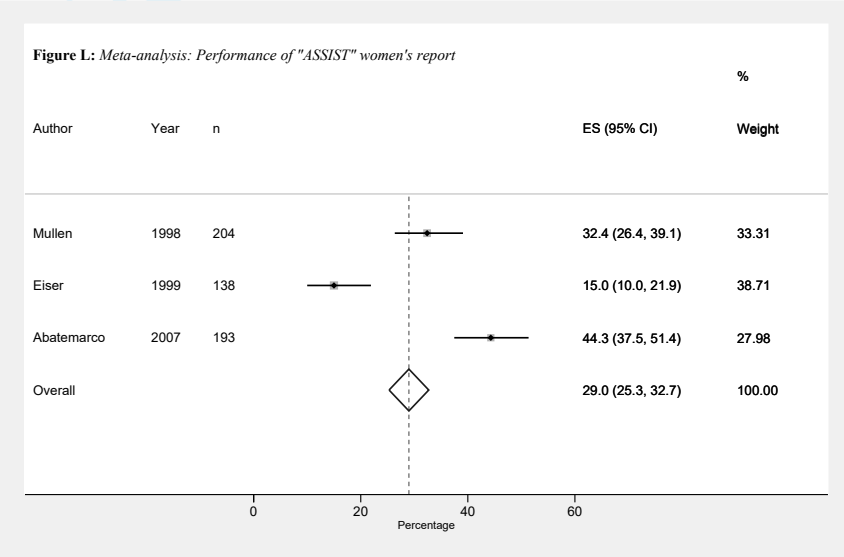

**Figure M:** Meta-analysis: Performance of "ASSIST" Quit plan often/always

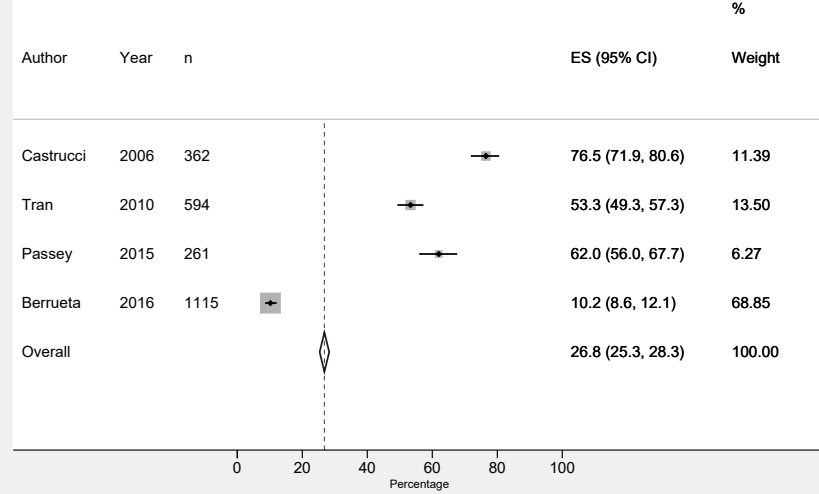

**Figure N:** Meta-analysis: Performance of "ARRANGE" Referral often/always

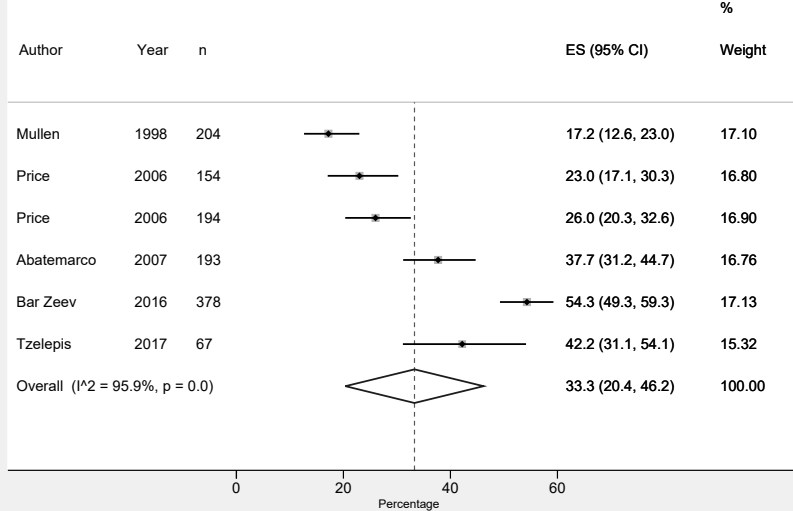

**Figure O:** Meta-analysis: "Prescribing NRT" often/always

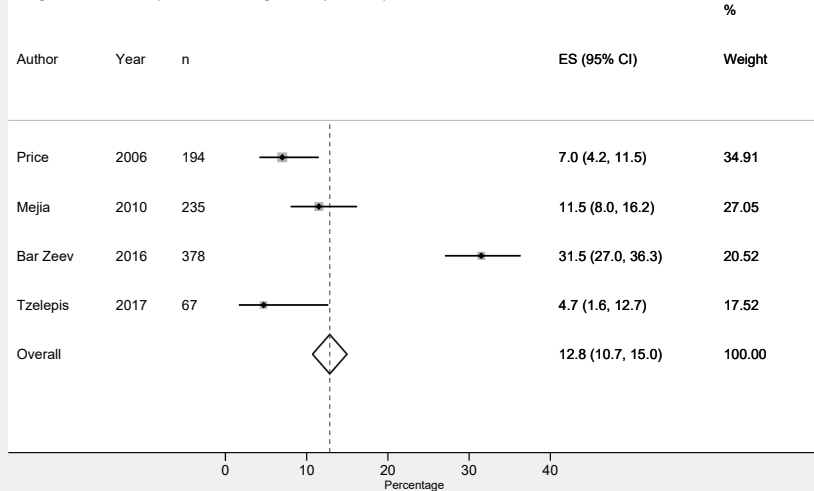

**Figure P:** Meta-analysis: "Prescribing NRT" always/all

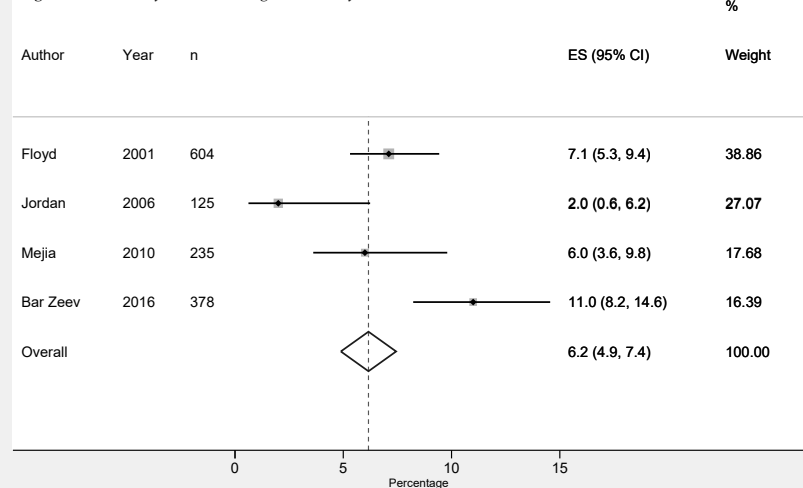

1  
2  
3  
4  
5  
6  
7  
8  
9  
10  
11  
12  
13  
14  
15  
16  
17  
18  
19  
20  
21  
22  
23  
24  
25  
26  
27  
28  
29  
30  
31  
32  
33  
34  
35  
36  
37  
38  
39  
40  
41  
42  
43  
44  
45  
46

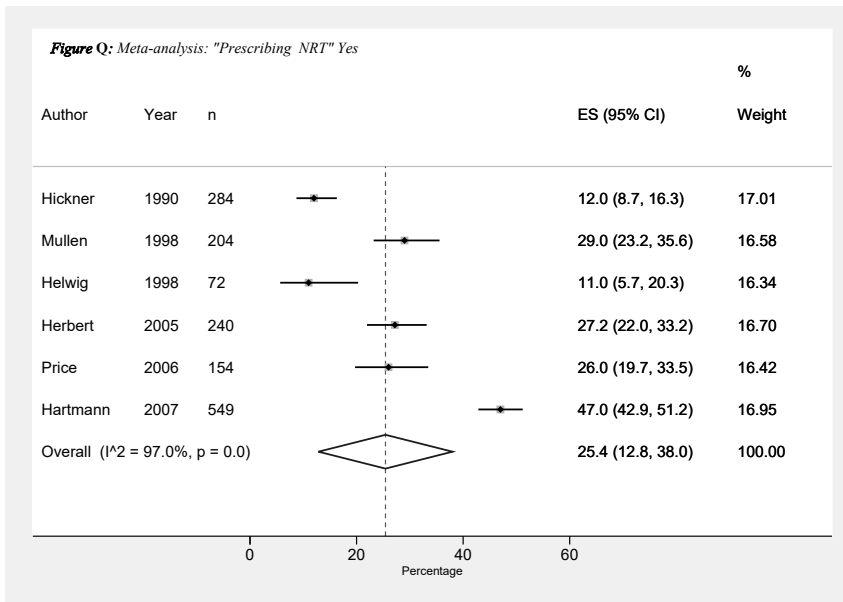

Review only

# Reporting checklist for meta-analysis of observational studies.

Based on the MOOSE guidelines.

## Instructions to authors

Complete this checklist by entering the page numbers from your manuscript where readers will find each of the items listed below.

Your article may not currently address all the items on the checklist. Please modify your text to include the missing information. If you are certain that an item does not apply, please write "n/a" and provide a short explanation.

Upload your completed checklist as an extra file when you submit to a journal.

In your methods section, say that you used the MOOSE reporting guidelines, and cite them as:

Stroup DF, Berlin JA, Morton SC, Olkin I, Williamson GD, Rennie D, Moher D, Becker BJ, Sipe TA, Thacker SB. Meta-analysis of observational studies in epidemiology: a proposal for reporting. Meta-analysis Of Observational Studies in Epidemiology (MOOSE) group. JAMA. 2000; 283(15):2008-2012.

|     | Reporting Item                                                                                                                                                                                                                                                                                                                     | Page Number |
|-----|------------------------------------------------------------------------------------------------------------------------------------------------------------------------------------------------------------------------------------------------------------------------------------------------------------------------------------|-------------|
| #1  | Identify the study as a meta-analysis of observational research                                                                                                                                                                                                                                                                    | NA          |
| #2  | Provide a structured summary including, as applicable: background; objectives; data sources; study eligibility criteria, participants, and interventions; study appraisal and synthesis methods; results; limitations; conclusions and implications of key findings; systematic review registration number (From PRISMA checklist) | 2-3         |
| #3a | Problem definition                                                                                                                                                                                                                                                                                                                 | 7           |
| #3b | Hypothesis statement                                                                                                                                                                                                                                                                                                               | NA          |
| #3c | Description of study outcomes                                                                                                                                                                                                                                                                                                      | 11-16       |
| #3d | Type of exposure or intervention used                                                                                                                                                                                                                                                                                              | NA          |
| #3e | Type of study designs used                                                                                                                                                                                                                                                                                                         | 9, 11       |

|    |          |     |                                                                          |      |
|----|----------|-----|--------------------------------------------------------------------------|------|
| 1  |          | #3f | Study population                                                         | 12   |
| 2  |          |     |                                                                          |      |
| 3  | Search   | #4a | Qualifications of searchers (eg, librarians and investigators)           | 8    |
| 4  | strategy |     |                                                                          |      |
| 5  |          |     |                                                                          |      |
| 6  |          |     |                                                                          |      |
| 7  |          | #4b | Search strategy, including time period included in the synthesis and     | 7    |
| 8  |          |     | keywords                                                                 |      |
| 9  |          |     |                                                                          |      |
| 10 |          |     |                                                                          |      |
| 11 |          | #4c | Effort to include all available studies, including contact with authors  | NA   |
| 12 |          |     |                                                                          |      |
| 13 |          | #4d | Databases and registries searched                                        | 7    |
| 14 |          |     |                                                                          |      |
| 15 |          | #4e | Search software used, name and version, including special features       | 7    |
| 16 |          |     | used (eg, explosion)                                                     |      |
| 17 |          |     |                                                                          |      |
| 18 |          |     |                                                                          |      |
| 19 |          | #4f | Use of hand searching (eg, reference lists of obtained articles)         | 7-8  |
| 20 |          |     |                                                                          |      |
| 21 |          | #4g | List of citations located and those excluded, including justification    | 7-8  |
| 22 |          |     |                                                                          |      |
| 23 |          |     |                                                                          |      |
| 24 |          | #4h | Method of addressing articles published in languages other than English  | NA   |
| 25 |          |     |                                                                          |      |
| 26 |          | #4i | Method of handling abstracts and unpublished studies                     | 8    |
| 27 |          |     |                                                                          |      |
| 28 |          | #4j | Description of any contact with authors                                  | NA   |
| 29 |          |     |                                                                          |      |
| 30 |          |     |                                                                          |      |
| 31 |          | #5a | Description of relevance or appropriateness of studies gathered for      | 9-10 |
| 32 |          |     | assessing the hypothesis to be tested                                    |      |
| 33 |          |     |                                                                          |      |
| 34 |          |     |                                                                          |      |
| 35 |          | #5b | Rationale for the selection and coding of data (eg, sound clinical       | 8    |
| 36 |          |     | principles or convenience)                                               |      |
| 37 |          |     |                                                                          |      |
| 38 |          |     |                                                                          |      |
| 39 |          | #5c | Documentation of how data were classified and coded (eg, multiple        | 8-9  |
| 40 |          |     | raters, blinding, and interrater reliability)                            |      |
| 41 |          |     |                                                                          |      |
| 42 |          | #5d | Assessment of confounding (eg, comparability of cases and controls in    | NA   |
| 43 |          |     | studies where appropriate)                                               |      |
| 44 |          |     |                                                                          |      |
| 45 |          |     |                                                                          |      |
| 46 |          | #5e | Assessment of study quality, including blinding of quality assessors;    | 9    |
| 47 |          |     | stratification or regression on possible predictors of study results     |      |
| 48 |          |     |                                                                          |      |
| 49 |          |     |                                                                          |      |
| 50 |          | #5f | Assessment of heterogeneity                                              | 10   |
| 51 |          |     |                                                                          |      |
| 52 |          | #5g | Description of statistical methods (eg, complete description of fixed or | 10   |
| 53 |          |     | random effects models, justification of whether the chosen models        |      |
| 54 |          |     | account for predictors of study results, dose-response models, or        |      |
| 55 |          |     | cumulative meta-analysis) in sufficient detail to be replicated          |      |
| 56 |          |     |                                                                          |      |
| 57 |          |     |                                                                          |      |
| 58 |          |     |                                                                          |      |
| 59 |          |     |                                                                          |      |
| 60 |          |     |                                                                          |      |

|    |     |                                                                                                                           |       |
|----|-----|---------------------------------------------------------------------------------------------------------------------------|-------|
| 1  | #5h | Provision of appropriate tables and graphics                                                                              | 11    |
| 2  |     |                                                                                                                           |       |
| 3  | #6a | Graphic summarizing individual study estimates and overall estimate                                                       | NA    |
| 4  |     |                                                                                                                           |       |
| 5  | #6b | Table giving descriptive information for each study included                                                              | 8     |
| 6  |     |                                                                                                                           |       |
| 7  |     |                                                                                                                           |       |
| 8  | #6c | Results of sensitivity testing (eg, subgroup analysis)                                                                    | 10-11 |
| 9  |     |                                                                                                                           |       |
| 10 | #6d | Indication of statistical uncertainty of findings                                                                         | 11    |
| 11 |     |                                                                                                                           |       |
| 12 |     |                                                                                                                           |       |
| 13 | #7a | Quantitative assessment of bias (eg, publication bias)                                                                    | NA    |
| 14 |     |                                                                                                                           |       |
| 15 | #7b | Justification for exclusion (eg, exclusion of non-English-language citations)                                             | NA    |
| 16 |     |                                                                                                                           |       |
| 17 |     |                                                                                                                           |       |
| 18 |     |                                                                                                                           |       |
| 19 | #7c | Assessment of quality of included studies                                                                                 | 18    |
| 20 |     |                                                                                                                           |       |
| 21 | #8a | Consideration of alternative explanations for observed results                                                            | 21    |
| 22 |     |                                                                                                                           |       |
| 23 | #8b | Generalization of the conclusions (ie, appropriate for the data presented and within the domain of the literature review) | 21    |
| 24 |     |                                                                                                                           |       |
| 25 |     |                                                                                                                           |       |
| 26 |     |                                                                                                                           |       |
| 27 | #8c | Guidelines for future research                                                                                            | 21    |
| 28 |     |                                                                                                                           |       |
| 29 |     |                                                                                                                           |       |
| 30 | #8d | Disclosure of funding source                                                                                              | 22    |
| 31 |     |                                                                                                                           |       |

32 Reproduced with permission from JAMA. 2000. 283(15):2008-2012. Copyright © 2000 American  
33 Medical Association. All rights reserved. This checklist was completed on 14. August 2018 using  
34 <http://www.goodreports.org/>, a tool made by the [EQUATOR Network](#) in collaboration with [Penelope.ai](#)  
35  
36  
37  
38  
39  
40  
41  
42  
43  
44  
45  
46  
47  
48  
49  
50  
51  
52  
53  
54  
55  
56  
57  
58  
59  
60



# BMJ Open

## What components of smoking cessation care during pregnancy are implemented by health providers? a systematic review and meta-analysis

|                                 |                                                                                                                                                                                                                                                                                                                                                                                                                                                                                                            |
|---------------------------------|------------------------------------------------------------------------------------------------------------------------------------------------------------------------------------------------------------------------------------------------------------------------------------------------------------------------------------------------------------------------------------------------------------------------------------------------------------------------------------------------------------|
| Journal:                        | <i>BMJ Open</i>                                                                                                                                                                                                                                                                                                                                                                                                                                                                                            |
| Manuscript ID                   | bmjopen-2018-026037.R1                                                                                                                                                                                                                                                                                                                                                                                                                                                                                     |
| Article Type:                   | Research                                                                                                                                                                                                                                                                                                                                                                                                                                                                                                   |
| Date Submitted by the Author:   | 17-Apr-2019                                                                                                                                                                                                                                                                                                                                                                                                                                                                                                |
| Complete List of Authors:       | Gould, Gillian; The University of Newcastle, School of Medicine and Public Health;<br>Twyman, Laura<br>Stevenson, Leah; The University of Newcastle, School of Medicine and Public Health<br>Gribbin, Gabrielle; The University of Newcastle, School of Medicine and Public Health<br>Bonevski, Billie; University of Newcastle, School of Medicine & Public Health<br>Palazzi, Kerrin; Hunter Medical Research Institute<br>Bar Zeev, Yael; University of Newcastle, School of Medicine and Public Health |
| <b>Primary Subject Heading</b>: | Smoking and tobacco                                                                                                                                                                                                                                                                                                                                                                                                                                                                                        |
| Secondary Subject Heading:      | Health services research, Addiction                                                                                                                                                                                                                                                                                                                                                                                                                                                                        |
| Keywords:                       | Maternal medicine < OBSTETRICS, PRIMARY CARE, PUBLIC HEALTH, Substance misuse < PSYCHIATRY                                                                                                                                                                                                                                                                                                                                                                                                                 |
|                                 |                                                                                                                                                                                                                                                                                                                                                                                                                                                                                                            |

SCHOLARONE™  
Manuscripts

1  
2  
3 **What components of smoking cessation care during pregnancy are implemented by**  
4  
5 **health providers? a systematic review and meta-analysis**  
6  
7  
8  
9

10 Gillian S Gould<sup>1 2</sup>, (corresponding author) [gillian.gould@newcastle.edu.au](mailto:gillian.gould@newcastle.edu.au)

11  
12 Laura Twyman<sup>1</sup>, [Laura.Twyman@newcastle.edu.au](mailto:Laura.Twyman@newcastle.edu.au)

13  
14 Leah Stevenson<sup>1</sup>, [leah.stevenson@my.jcu.edu.au](mailto:leah.stevenson@my.jcu.edu.au)

15  
16 Gabrielle R Gribbin,<sup>1</sup> [gabrielle.gribbin@newcastle.edu.au](mailto:gabrielle.gribbin@newcastle.edu.au)

17  
18 Billie Bonevski<sup>1</sup>, [billie.bonevski@newcastle.edu.au](mailto:billie.bonevski@newcastle.edu.au)

19  
20 Kerrin Palazzi<sup>2</sup>, [Kerrin.Palazzi@hmri.org.au](mailto:Kerrin.Palazzi@hmri.org.au)

21  
22 Yael Bar-Zeev<sup>1</sup> [Yael.BarZeev@uon.edu.au](mailto:Yael.BarZeev@uon.edu.au)

23  
24  
25  
26  
27  
28 <sup>1</sup> School of Medicine and Public Health, University of Newcastle, New South Wales (NSW),  
29  
30 Australia

31  
32  
33 <sup>2</sup>Hunter Medical Research Institute, NSW, Australia  
34  
35  
36  
37  
38  
39  
40  
41  
42  
43  
44  
45  
46  
47  
48  
49  
50  
51  
52  
53  
54  
55  
56  
57  
58  
59  
60

## Abstract

**Background** Pregnancy is an opportunity for health providers to support women to stop smoking.

**Objectives** Identify the pooled prevalence for health providers in providing components of smoking cessation care to women who smoke during pregnancy.

**Design** A systematic review synthesising original articles that reported on 1) prevalence of health providers' performing the 5As ('Ask', 'Advise', 'Assess', 'Assist', 'Arrange'), prescribing nicotine replacement therapy (NRT), and 2) factors associated with smoking cessation care.

**Data Sources** MEDLINE, EMBASE, CINAHL and PsycINFO databases searched using "smoking", "pregnancy" and "health provider practices".

**Eligibility criteria for selecting studies** Studies included any design except interventions (self-report, audit, observed consultations, women's reports), in English, with no date restriction, up to June 2017.

**Participants** Health providers of any profession

**Data extraction, appraisal and analysis** Data were extracted, then appraised with the Hawker tool. Meta-analyses pooled percentages for performing each of the 5As and prescribing NRT, using e.g., 'often/always' and 'always/all'. Meta-regressions were performed of 5As for 'often/always'.

**Results** Of 3933 papers, 54 were included ( $n = 29,225$  participants): 33 for meta-analysis. Health providers included general practitioners, obstetricians, midwives and others from 10

1  
2  
3 countries. Pooled percentages of studies reporting practices ‘often/always’ were: ‘Ask’ ( $n=9$ )  
4 91.6% (95%CI:88.2,95); ‘Advise’ ( $n=7$ ) 90% (CI:72.5,99.3), ‘Assess’ ( $n=3$ ) 79.2%  
5  
6 (CI:76.5,81.8), ‘Assist (cessation support)’ ( $n=5$ ) 59.1% (CI:56, 62.2), ‘Arrange (referral)’  
7  
8 ( $n=6$ ) 33.3% (CI:20.4,46.2), and ‘prescribing NRT’ ( $n=6$ ) 25.4% (CI:12.8,38). Heterogeneity  
9  
10 ( $I^2$ ) was 95.9%-99.1%. Meta-regressions for ‘Arrange’ were significant for year ( $p=0.013$ )  
11  
12 and country ( $p=0.037$ ).  
13  
14  
15  
16  
17

18 **Conclusions** Health providers ‘Ask’, ‘Advise’ and ‘Assess’ most pregnant women about  
19  
20 smoking. ‘Assist’, ‘Arrange’ and ‘prescribing NRT’ are reported at lower rates: strategies to  
21  
22 improve these should be considered.  
23  
24  
25

26 **Registration** PROSPERO 2015:CRD42015029989.  
27  
28  
29  
30

### 31 **Strengths and limitations of this study**

- 32 • Comprehensive meta-analysis and meta-regression of health providers  
33  
34 implementation of the 5As combining like measures for smoking cessation care.  
35  
36
- 37 • Fifty four studies from 7 high-income and three low-middle income countries  
38  
39 includes disciplines of medicine, nursing, and allied health.  
40  
41
- 42 • High heterogeneity in the meta-analyses was unexplained by the meta-regressions,  
43  
44 except for ‘Arrange referral-often/always’ which was related to year, and country  
45  
46
- 47 • Quality ratings of some papers were poor - findings from these studies may be less  
48  
49 reliable.  
50  
51
- 52 • Review aids in determining which components of smoking cessation care are less  
53  
54 reliably implemented in pregnancy.  
55  
56  
57  
58  
59  
60

**Keywords:** smoking, health care providers, smoking cessation, maternal health, pregnancy

1  
2  
3 **Word count: 4724**  
4  
5  
6  
7  
8  
9  
10  
11  
12  
13  
14  
15  
16  
17  
18  
19  
20  
21  
22  
23  
24  
25  
26  
27  
28  
29  
30  
31  
32  
33  
34  
35  
36  
37  
38  
39  
40  
41  
42  
43  
44  
45  
46  
47  
48  
49  
50  
51  
52  
53  
54  
55  
56  
57  
58  
59  
60

For peer review only

## Introduction

Smoking during pregnancy carries high risks for mother and child, including obstetric complications for the mother,<sup>1</sup> and for the baby, premature birth, growth restriction, low birth weight, still-birth, and congenital defects.<sup>1,2</sup> Longer-term effects on the child include respiratory illnesses, learning and behavioral problems, and increased risks of chronic diseases,<sup>1,2</sup> and of taking up smoking in adolescence.<sup>3</sup>

Smoking during pregnancy remains a prevalent behaviour in many countries, with estimated smoking prevalence rates ranging from 0.2% to 38.4%.<sup>4</sup> Pregnancy is a time when women are more likely to be motivated to stop smoking.<sup>5</sup> However, disadvantaged women, including women from minority and Indigenous populations where there is a high prevalence of community smoking, also smoke at higher rates and are less likely to try to stop smoking, or succeed than more advantaged women among whom smoking prevalence is lower.<sup>6, 7</sup> Also, less likely to stop smoking are women who are: of low socio-economic status,<sup>6</sup> multiparous,<sup>6</sup> adolescents,<sup>8</sup> partnered by smokers,<sup>6</sup> and those experiencing: alcohol or substance use,<sup>8</sup> depression,<sup>9</sup> life stressors,<sup>10,11</sup> or intimate partner violence.<sup>12</sup> Women frequently reduce tobacco consumption when discovering they are pregnant,<sup>11,13</sup> indicating a consciousness about the risks, but may be less likely to abstain than non-pregnant women.<sup>14</sup> Pregnant women report a lack of support for smoking cessation, and that health providers (HP) consider cutting down to be acceptable.<sup>15,16</sup>

HPs in primary care have a critical role to offer advice and support women to stop smoking during pregnancy.<sup>17</sup> Ideally smoking cessation care (SCC) includes counselling and pharmacotherapy – most successful when combined.<sup>17,18</sup> In pregnancy, the effective use of

1  
2  
3 pharmacotherapy is less certain, and clinical guidelines vary across and within different  
4 countries.<sup>17</sup> In pregnancy, only nicotine replacement therapy (NRT) is recommended, but not  
5 consistently advised for use in pregnancy in all countries,<sup>17,19</sup> for example NRT is not advised  
6 in the USA for use in pregnancy,<sup>20</sup> but it is more routinely prescribed in the UK.<sup>21</sup> Clinical  
7 guidelines in the UK, Australia, New Zealand and Canada recommend that a woman should  
8 initially endeavour to quit without medication, but if she cannot, NRT can be prescribed.<sup>17 22-</sup>  
9  
10  
11  
12  
13  
14  
15  
16

17 25

18  
19  
20  
21 The 5As ('Ask (about smoking)', 'Advise (to quit)', 'Assess (motivation and/or  
22 dependence)', 'Assist (with cessation)', and 'Arrange (follow-up or referral)') has been  
23 adopted in many countries as a strategy for HPs to deliver all the important components of  
24 SCC.<sup>26</sup> Several studies have examined the performance of the 5As in pregnancy. Two  
25 reviews summarised the literature . Okoli et al's integrative review reported on HP  
26 performance of components of the 5As. While authors reported more than 50% of HPs Ask  
27 and Advise about smoking, and less than 50% Assess, Assist or Arrange (referral or follow-  
28 up), it is unclear how these estimates were calculated. This is an important limitation  
29 considering the variable ways studies collect data and report them,<sup>27</sup> Baxter et al's qualitative  
30 systematic review, on the factors that influenced uptake of interventions by pregnant women,  
31 included studies on HP and women's reports of their receipt of SCC, and noted variation  
32 between HPs for recording smoking status and advice.<sup>28</sup> As neither review included a meta-  
33 analysis, it is timely and important from the point of view of rigour to have a definitive  
34 evaluation of HP practices, and furthermore to accurately inform recommendations to guide  
35 strategies to improve SCC. An urgent need for research to increase the uptake of smoking  
36 cessation interventions, and improve quit rates in pregnant women who smoke has been  
37 identified by Siddiqi and Mdege<sup>29</sup>  
38  
39  
40  
41  
42  
43  
44  
45  
46  
47  
48  
49  
50  
51  
52  
53  
54  
55  
56  
57  
58  
59  
60

1  
2  
3  
4  
5 The objective of this systematic review was to summarise published empirical research of  
6 eligible studies from a range of HPs who consult with pregnant women who smoke, and  
7 synthesise findings with meta-analyses where feasible. The primary aim was to determine the  
8 prevalence of the components of SCC that were being practiced, including the 5As,  
9 prescribing NRT, and related behaviour change techniques (BCTs - observable and replicable  
10 components designed to change behaviour),<sup>30</sup> thus determine which aspects of SCC need  
11 improvement. A second aim was to examine which factors were associated with delivery of  
12 the 5As, and NRT prescribing i.e., HP types, country, year, and pregnant women in high-risk  
13 populations. We also examined data about knowledge and attitudes of the HPs to inform their  
14 practices.  
15  
16  
17  
18  
19  
20  
21  
22  
23  
24  
25  
26  
27  
28  
29  
30

## 31 **Methods**

32  
33  
34  
35 Data were identified by searches of MEDLINE, EMBASE, CINAHL and PsycINFO, and  
36 reference lists from relevant articles. Where possible, search terms were matched to MESH  
37 or database specific subject headings, and used as keywords. Search terms included  
38 (Supplementary File Table 1): pregnancy (e.g., perinatal care, mother), smoking (e.g.,  
39 nicotine dependence, smoking cessation), health professional (e.g., general practitioner,  
40 midwife), and attitudes or practices (e.g., capacity, belief). Searches were performed in  
41 September 2015; additional studies included until June 2017.  
42  
43  
44  
45  
46  
47  
48  
49  
50  
51  
52  
53

54 Inclusion criteria: peer-reviewed full papers on SCC to pregnant smokers by any HP in  
55 any setting, restricted to English language, with no date restrictions. Quantitative  
56 studies and/or quantitative data from mixed methods studies with any study design  
57  
58  
59  
60



1  
2  
3 were included, comprising self-reported provision of SCC by HPs, reported receipt of  
4 SCC by pregnant women, or other indicators e.g., chart audit or audio-recordings of  
5 consultations. For this review, SCC was based on the 5As: asking about smoking,  
6  
7 advising about quitting, assessing motivation to stop smoking or nicotine dependence,  
8  
9 assisting to quit, and arranging follow up or referral.<sup>26</sup> In addition, we included papers  
10 reporting HP knowledge, attitudes, and other practices e.g., advising about relapse and  
11  
12 smoke-free homes, discussing psychosocial contexts of smoking, involving family  
13  
14 members or partners, prescribing NRT, and other BCTs (e.g., setting a quit date,  
15  
16 making a quit plan, providing resources and self-help materials, aiding social support,  
17  
18 encouraging smoke-free environments, and monitoring carbon monoxide readings).<sup>31,32</sup>  
19  
20 Exclusion criteria: intervention studies and studies in non-peer-reviewed literature;  
21  
22 studies on pre-conceptual and post-natal care. Additionally, 10 papers that did not have  
23  
24 a main focus on the review topic and/or reported minimal data about the topic such as  
25  
26 one line or one data item in a full paper, were excluded (list available from authors on  
27  
28 request). The review was registered with PROSPERO 2015: CRD42015029989. We  
29  
30 used the MOOSE checklist when writing our report.<sup>33</sup>  
31  
32  
33  
34  
35  
36  
37  
38  
39  
40  
41

42 Two researchers (LT – behavioural scientist, YB - physician) independently screened titles,  
43  
44 abstracts, and then full papers and applied the inclusion criteria to determine eligibility.

45  
46 Discrepancies were resolved by consensus, with a third researcher (GSG) acting as  
47  
48 adjudicator, when agreement was not reached. Studies that met all criteria were retained for  
49  
50 full review. One researcher completed data extraction (LS) with a second (YB) extracting  
51  
52 20% of articles, then results compared. A summary table (Supplementary File Table 2) was  
53  
54 developed from this data (GRG, GSG). The characteristics of each study were examined  
55  
56 including aims, setting, country, sample characteristics, study focus (HP or women), HP type,  
57  
58  
59  
60

1  
2  
3 study design and method, measures, extracted results for each of the 5As, prescription of  
4  
5 NRT, and whether the study addressed the provision of BCTs, and if so a description of the  
6  
7 BCTs (e.g., setting a quit date, increasing self-efficacy, monitoring carbon monoxide reading,  
8  
9 validating abstinence).

10  
11  
12  
13  
14 As the studies overall were of all types of design, a quality assessment of the quantitative and  
15  
16 mixed studies was carried out using Hawker et al's tool for reviewing disparate data  
17  
18 systematically.<sup>34</sup> This was chosen in the absence on any consensus on the best tool, as we  
19  
20 were including quantitative and mixed method studies in the review. LS rated all studies  
21  
22 using the tool (20% double-rated by YB). Studies were included irrespective of quality.  
23  
24  
25  
26  
27

28  
29 Quantitative data were presented as percentages and counts where possible, and meta-analyses  
30  
31 made for estimates of each of the 5As of SCC provision, and prescribing NRT. A narrative  
32  
33 analysis summarises other studies or outcomes, including BCTs where reported. For each  
34  
35 outcome measure we looked at the specific measurements across studies to determine  
36  
37 whether it was clinically appropriate to group them together i.e., Ask, Advise, Assess  
38  
39 (motivation to quit, nicotine dependence), Assist (cessation support, quit date, quit plan,  
40  
41 prescribe NRT), Arrange (follow up, referral). To achieve this, we considered both the data  
42  
43 collection method (cross-sectional survey; audit of patients' medical records; audio-recording  
44  
45 of consultation; women's report through survey or interview) and the measure itself that was  
46  
47 used (e.g., Likert scale, or a dichotomous Yes/No response, and so forth). General principles  
48  
49 applied were as followed (explained in more detail in Supplementary Text 1):  
50  
51  
52  
53  
54  
55  
56  
57  
58  
59  
60

- **‘Often/Always’** included survey measures reflecting asking ‘often’ and ‘always’, ‘usually and always’; and/or ‘most of the time’ and ‘all of the time’). The combined answers in Likert scales were dichotomised for analysis.
- **‘Always/all’** included in this analysis was the proportion of HPs answering ‘always’ or ‘all of the time’, if a Likert scale was used, or the proportion answering ‘Yes’ if a dichotomous question was used: either asking ‘do you ask all of your patients?’ or ‘do you ask your patients always?’ Answers reporting on ‘Asking’ more than 75% of their patients were considered as ‘Yes’ for these analyses.
- **‘Yes’** where a survey asked the HP a dichotomous question for example ‘Do you advise? Yes/No’ were grouped separately as “Advise - Yes”
- Papers describing women’s reports were analysed separately from those describing health provider reports

All statistical analyses were programmed using Stata v13.1 (StataCorp LP, College Station, TX, USA). Meta-analyses were performed to examine the performance of each of the 5As, including prescribing NRT, as above. Stata program *Metaprop* was used to pool dichotomized responses for each of the 5As. If more than 5 studies were pooled, random effects modelling (DerSimonian and Laird’s method) was used to account for differences in underlying estimates due to study population and design; heterogeneity ( $I^2$ ) was measured for each reporting type. If the number of studies was low ( $\leq 5$ ), fixed effects modelling was used as the between-studies variance (tau-squared), and therefore the mean of the underlying random distribution cannot be estimated with precision; heterogeneity is not presented.<sup>35</sup> Where required, in order to include studies where the percent reporting the outcome was 100%, the Freeman-Tukey Double Arcsine Transformation method was used to stabilize the

1  
2  
3 variances prior to pooling. Pooled estimates for study outcomes were split by response, and  
4  
5 also by HP type. Significance was set as  $\alpha=0.05$  a priori.  
6  
7  
8  
9

10 For the 'often/always' responses to Ask, Advise, Assist, Arrange, including prescribing NRT,  
11  
12 meta-regression (Stata program *Metareg*) was used to examine whether some of the  
13  
14 heterogeneity seen in the proportions reported for each study could be explained by HP type  
15  
16 (e.g. midwife, general practitioners (GP), obstetricians (OBS), or mixed groups of HPs),  
17  
18 high-risk population versus not (e.g., women in low socio-economic groups, Indigenous  
19  
20 women, or with mental health diagnoses), country (USA, Europe, Australia/New Zealand, or  
21  
22 Other), or year of publication (1990-2017). P-value, changes in heterogeneity ( $I^2$  residual),  
23  
24 changes in between study variance ( $\tau^2$ ), and proportion of between-study variance explained  
25  
26 by predictor (adjusted  $R^2$ ) were reported. For year, the linearity of proportion over time was  
27  
28 examined, and if a non-linear trend was seen then the meta-regression was not performed.  
29  
30  
31  
32  
33  
34  
35  
36  
37  
38  
39  
40  
41  
42  
43  
44  
45  
46  
47  
48  
49  
50  
51  
52  
53  
54  
55  
56  
57  
58  
59  
60

Meta-regressions for the other meta-analyses were not performed.

An analysis of agreement of quality-rating coders was performed. Weighted kappa  
(ordinal multi-rater - quadratic weighted Kappa) was used to compare the rating of 9  
quality study criteria for 15 studies; each criteria was scored on a 5 point scale (Very  
poor, Poor, Fair, Good, Very Good). Mean (SD) ratings were calculated for each  
criteria for each rater. Kappa and weighted kappa estimates were interpreted using cut-  
off criteria specified by Altman.<sup>36</sup> Strength of agreement was < 0.20 Poor; 0.21 - 0.40  
Fair; 0.41 - 0.60 Moderate; 0.61 - 0.80 Good; 0.81 - 1.00 Very Good.

## Patient and Public Involvement

1  
2  
3 As a systematic review we did not directly involve any patients or public in the study.  
4  
5 However the review was informed by patient and health provider needs. Participants from  
6  
7 previous studies reported to us that they were not receiving comprehensive smoking cessation  
8  
9 care during pregnancy from their health providers,<sup>16</sup> nor were health providers in a previous  
10  
11 study reporting they delivered comprehensive smoking cessation care.<sup>37</sup> This review was  
12  
13 responsive to global knowledge about the receipt and delivery of smoking cessation care in  
14  
15 pregnancy being a gap in the literature.  
16  
17  
18  
19  
20  
21

## 22 **Results**

23  
24  
25  
26  
27 Of the 3933 studies found, 54 papers met the inclusion criteria for quantitative review. See  
28  
29 Prisma Flow Chart for included studies (Figure 1).  
30  
31  
32

33  
34 A total of 54 studies were included in this analysis.<sup>37-90</sup> Study details including author,  
35  
36 country, study focus (HP, women, or both), population and risk category (high/low), study  
37  
38 aims, inclusion of 5As, and summary of results are presented in Supplementary File Table 2.  
39  
40 Of these studies, approximately 90% were quantitative ( $n = 49$ ),<sup>38-43,45,48-64,66-75,77-91</sup> and  
41  
42 approximately 10% ( $n = 5$ ) utilized mixed methods, containing both quantitative and  
43  
44 qualitative aspects.<sup>44,46,47,65,76</sup> The included studies used the following study methods: survey  
45  
46 ( $n = 48$ ),<sup>38-45,48-62,64-67,69-81,84-91</sup> audio-recordings ( $n = 2$ ),<sup>46,47</sup> audit ( $n = 2$ ),<sup>82,83</sup> audit with  
47  
48 interview ( $n = 1$ ),<sup>63</sup> and observational ( $n = 1$ ).<sup>68</sup>  
49  
50  
51  
52

53  
54 Study location included seven high income countries (United States of America,<sup>38,45,49,54,57-  
55  
56 59,61,65,71,78,79,86</sup> United Kingdom,<sup>44,48,52,60,74</sup> Australia,<sup>51,75,76,87,90,91</sup> Germany,<sup>81,84  
57  
58 Switzerland,<sup>66</sup> New Zealand,<sup>55,56,80</sup> France,<sup>46</sup>) and three low to middle income countries  
59  
60 (Jordan, Argentina, and Uruguay).<sup>28,32,59</sup></sup>

1  
2  
3  
4  
5  
6 Included studies focused on either HPs ( $n = 39$ , 72%),<sup>38,39,41,43,44,47-55,57-61,65,66,68-73,75,78-</sup>  
7  
8 81,83,84,87-91 pregnant women ( $n = 12$ , 22%),<sup>40,42,45,56,62,63,67,74,76,82,85,86</sup> or both HPs and pregnant  
9  
10 women ( $n = 3$ , 6%).<sup>46,64,77</sup> Studies encompassing HPs included obstetricians and  
11  
12 gynaecologists (OBS) ( $n = 9$ , 21%),<sup>39,49,53,54,57,65,71,73,79</sup> midwives ( $n = 7$ , 17%),<sup>38,41,51,52,64,72,84</sup>  
13  
14 general practitioners (GPs) ( $n = 3$ , 7%),<sup>60,61,68</sup> multiple professions (e.g., OBS, GPs, nurses,  
15  
16 healthcare assistants;  $n = 21$ , 50%),<sup>43,44,46-48,50,55,58,59,66,69,70,75,77,79-81,87,89-91</sup> or did not report the  
17  
18 profession ( $n = 1$ , 2%).<sup>83</sup>

19  
20  
21  
22 Out of the 54 papers, information on Ask, Advise, Assess, Assist and Arrange (follow  
23  
24 up/referral) was reported by approximately 68%, 70%, 28%, 63%, and 54% of studies,  
25  
26 respectively. Few studies addressed all of the 5As combined ( $n=12$ , 22%). These reported  
27  
28 that HPs rarely addressed all of the 5As, e.g. only 19.6% of respondents in Bar-Zeev et al's  
29  
30 study of GPs and OBS performed all of the 5As 'often/always'.<sup>91</sup>

31  
32  
33  
34 Only four studies (7%) addressed the provision of other BCTs in pregnancy. In one study,  
35  
36 31% of OBS advised women to set a quit date;<sup>39</sup> in a second study 29% of midwives  
37  
38 suggesting quitting with an acquaintance;<sup>52</sup> 97% of women in a third sample reported they  
39  
40 had not had their exhaled carbon monoxide tested,<sup>56</sup> and a fourth study reported which clinics  
41  
42 used open-ended questions and problem solving.<sup>89</sup> Additionally, some studies ( $n=12$ , 22%),  
43  
44 obtained information on or addressed a woman's psychosocial context for smoking e.g.,  
45  
46 family or partner's smoking status or involvement in quitting, a woman's social support, or  
47  
48 her living environment e.g., a smoke free home or vehicle ( $n=3$ , 6%). Information regarding  
49  
50 the use of resources was addressed in 20 studies (37%), i.e., providing pamphlets or  
51  
52 recommending online programs. Advise about relapse was rarely addressed in the included  
53  
54 literature ( $n=3$ , 6%); e.g. in one of the studies midwives reported they discussed with women  
55  
56 how to avoid relapse.<sup>52</sup>

1  
2  
3 Twenty-nine papers of the 54 papers addressed NRT in some capacity. These included  
4 knowledge and training, attitudes to NRT, and prescribing of NRT. Papers addressing  
5 knowledge, attitudes and training in general ( $n=14$ , 26%) also reported on HP knowledge  
6 about whether NRT can be used in pregnancy, and HP confidence about their smoking  
7 cessation knowledge, awareness of smoking cessation guidelines, knowledge about the  
8 consequences of smoking for expectant mothers, and risks to their baby. The majority of HPs  
9 believed maternal smoking to be harmful to the fetus and/or the woman, with reports ranging  
10 from 90-100%. General knowledge about smoking in pregnancy varied (e.g., in Bonollo et  
11 al,<sup>43</sup> only 44-52% of US HPs of various types, had correct knowledge). In Mejia et al's study  
12 75% of Argentinian physicians believed it was safe to smoke up to six cigarettes when  
13 pregnant.<sup>69</sup>

14  
15 In addition, the above group of studies included aspects of smoking cessation training (i.e.,  
16 whether training had been offered, engaged in, and if more training was needed). In general,  
17 HPs reported they had received limited training on smoking cessation care in pregnancy, and  
18 identified that they required more training.

19  
20 Papers including information on NRT prescribing ( $n=14$ , 26%) reported on the frequency of  
21 considering to prescribe NRT, the frequency of recommendation of NRT, frequency of  
22 prescribing NRT, percentage of NRT scripts filled by women, percentage following FDA  
23 NRT prescription recommendations, and the different NRT types prescribed (e.g., patches,  
24 gum, or inhalators). Overall findings suggested that HPs more often than not chose to not  
25 prescribe NRT to pregnant women who smoke, this was also supported by the meta-analysis  
26 below.

27  
28 Attitudes and knowledge was associated with HP practices. In one Australian study, higher  
29 levels of knowledge about NRT were associated with greater likelihood of assessing  
30  
31  
32  
33  
34  
35  
36  
37  
38  
39  
40  
41  
42  
43  
44  
45  
46  
47  
48  
49  
50  
51  
52  
53  
54  
55  
56  
57  
58  
59  
60

1  
2  
3 women's smoking status.<sup>75</sup> In another US study, OBS who perceived NRT as safe to use in  
4 pregnancy were 20 times more likely to prescribe NRT.<sup>78</sup> An Australian study determined  
5 that HP optimism, and confidence in counselling and/or prescribing NRT, and having  
6 sufficient time and resources were associated with a higher performance of all the 5As.<sup>91</sup>  
7  
8  
9  
10  
11  
12  
13 Thirty-three studies were suitable for meta-analysis.<sup>38,39,42,44,45,48,49,51,52,54-58,60,61,65,66,69,71,74-  
14 76,78,80,81,84,87,90,92</sup> Seventeen meta-analyses were performed and associated forest plots  
15 constructed (see Supplementary File Forest Plot Figures 1 to 17). Figure 2 provides a visual  
16 comparison for pooled percentages of selected categories of 'often/always'.

17  
18  
19  
20  
21  
22  
23  
24  
25 Overall the performance of 'Ask – often/always' ( $n=9$ ) was 91.6% (95% CI 88.2%, 95%).  
26 Percentages for 'Ask – 'always/all'' ( $n=11$ ) was similar at 91.5% (95%CI 85%, 96.3%).  
27 Percentages for 'Ask – Yes' ( $n=4$ , all by women's report) was slightly higher at 93.6%  
28 (95%CI 92.6%, 94.6%).

29  
30  
31  
32  
33  
34  
35  
36 The performance of 'Advise – often/always' ( $n = 7$ ) was 90% overall (95%CI 72.5%,  
37 99.3%). Percentages for 'Advise – always/all' ( $n = 6$ ) was 86.4% overall (95%CI 79.6%,  
38 93.3%). Percentages for 'Advise – Yes' (HP report) ( $n = 4$ ) was much lower at 58.1% overall  
39 (95%CI 55.9%, 60.4%). Percentages for 'Advise – women's report Yes' ( $n = 4$ ) was similar  
40 at 53.6% overall (95%CI 52.6%, 54.6%). Percentages for 'Assess motivation to quit –  
41 often/always' ( $n = 3$ ) was 79.2% overall (95%CI 76.5%, 81.8%).

42  
43  
44  
45  
46  
47  
48  
49  
50  
51  
52 Overall 34 manuscripts included a question about assisting. Some were generally asked about  
53 assisting the patient to quit, others specified a method of assisting such as counselling, setting  
54 a quit date, making a quit plan, and prescribing NRT. Those in the meta-analysis were as  
55 follows: 'Assist cessation support – often/always' ( $n = 5$ ) was 59.1% (95%CI 56%, 62.2%);  
56  
57  
58  
59  
60



1  
2  
3 ‘Assist counselling – yes’ ( $n=5$ ) was higher at 80.7% (95%CI 79%, 82.5%); ‘Assist quit  
4 plan – often/always’ ( $n=2$ ) was 57.6% (95%CI 54.1%, 61.1%); ‘Assist quit date –  
5 often/always’ ( $n=3$ ) was low at 29% (95%CI 25.3%, 32.7%); ‘Assist – women’s report Yes’  
6 ( $n=4$ ) was the lowest at 26.8% (95%CI 25.3%, 28.3%). The performance of ‘Arrange referral  
7 – often/always’ ( $n=6$ ) was 33.3% overall (95%CI 20.4%, 46.2%). There was no analysable  
8 data on women’s report for ‘Arrange’.  
9  
10  
11  
12  
13  
14  
15  
16

17  
18  
19 ‘Prescribing NRT – Yes’ was 25.4% ( $n=6$ ) overall (95%CI 12.8%, 38%). ‘Prescribing NRT –  
20 often/always’ ( $n=4$ ) however was very low at 12.8% overall (95%CI 10.7%, 15%). The  
21 performance of ‘Prescribing NRT – always’ ( $n=4$ ) was the lowest at 6.2% overall (95%CI  
22 4.9%, 7.4%). There was no analysable data on women’s report of having been prescribed  
23 NRT. All of the studies in the meta-analysis for ‘Prescribing NRT – Yes’ were from the  
24 USA (Supplementary File Forest Plot Figure 17).  
25  
26  
27  
28  
29  
30  
31  
32  
33  
34

35 High heterogeneity ( $I^2=95.9-99.1\%$ ) was seen for: ‘Ask – often/always’; ‘Ask – always’;  
36 ‘Advise – often/always’; ‘NRT prescription’; ‘Arrange referral – often/always’; thus  
37 indicating considerable diversity in study outcomes, methodology, or populations. A fixed  
38 effects model was used for the following outcomes due to low number of studies, and  
39 heterogeneity was not measured: ‘Ask – women’s report Yes’; ‘Advise – Yes’; ‘Assess  
40 motivation to quit – often/always’; all the ‘Assist’ categories; ‘NRT Prescription – always’,  
41 ‘NRT Prescription – often/always’.  
42  
43  
44  
45  
46  
47  
48  
49  
50  
51  
52  
53

54 Table 1 displays the results of the meta-regression of the ‘often/always’ categories of ‘Ask’,  
55 ‘Advise’, ‘Arrange’, and ‘Prescribing NRT’ from the meta-analysis. ‘Assist’ only had 5  
56 studies, so the meta-regression was not performed. For nearly all of the measures, none of the  
57  
58  
59  
60

1  
2  
3 predictors examined significantly explained the heterogeneity of the proportions for the  
4 studies. For ‘Arrange referral –often/always’, country was found to explain some of the  
5 differences in proportion of HPs providing this type of smoking cessation care; with  
6 Australian and New Zealand studies having significantly higher proportions of HPs reporting  
7 ‘Arrange referral – often/always’ than USA studies (on average). Year was also found to  
8 explain some of the differences in proportion with later years having higher proportions of  
9 HP reporting this ‘Arrange referral- often or always’ (on average).  
10  
11  
12  
13  
14  
15  
16  
17  
18  
19  
20

21 Table 2 shows the quality rating with the Hawker et al tool,<sup>34</sup> for included studies. Over 70%  
22 of the studies had some aspects at least that were rated as good, and 20 out of 53 (37.7%)  
23 studies that were rated had at least 5 ‘good’ categories out of the 9 available options.  
24 Common flaws were lack of clarity about aims, sampling processes not detailed, ethics  
25 processes not described, and no suggestions made for further research.  
26  
27  
28  
29  
30  
31  
32  
33  
34

35 Table 3 shows the quality ratings of the studies, and level of agreement from using the  
36 Hawker tool,<sup>34</sup> for the 15 papers that were rated independently by two raters. Coder  
37 agreement varied from Poor for two criteria, Fair for four of the criteria, and Moderate for  
38 three criteria.  
39  
40  
41  
42  
43  
44  
45  
46

## 47 **Discussion**

48  
49  
50

51 This systematic review of 54 studies from 10 countries on a range of HPs who consult with  
52 pregnant women who smoke. Thirty-three studies were suitable for meta-analyses for at least  
53 one outcome measure. Studies displayed considerable variation in the way they assessed HP  
54 provision of each of the 5As. Commonly surveys employed Likert scales that were re-  
55  
56  
57  
58  
59  
60

1  
2  
3 categorised as ‘often or always’, or questions forcing a ‘Yes/No’ option. We pragmatically  
4 transformed outcome measures so they could be combined for meta-analysis, over the 5As  
5 and their subcategories, resulting in small numbers of studies in each forest plot, which  
6 means that interpretations should be cautious. We acknowledge that there was no ideal way  
7 to combine these measures. Conceptually, using a scale to quantify responses is quite  
8 different from a ‘yes’ option: the latter may be an option chosen by respondent whether they  
9 perform the practice at an frequency from occasionally to always (ie not at all quantified) –  
10 therefore we did not combine ‘often/always’ with ‘Yes/No’ study measures.  
11  
12  
13  
14  
15  
16  
17  
18  
19  
20  
21  
22  
23

24 The primary aim to determine the prevalence of the components of SCC that were being  
25 practiced by a range of HPs. The review demonstrated several aspects of SCC that could be  
26 improved for pregnant women, including those seen in primary care settings. The highest  
27 rates were for Ask and Advise, and Assess. Assist and Arrange were consistently lower. Our  
28 secondary aim to examine whether SCC differed between different HP types, for pregnant  
29 women in high-risk populations, by country, and by year was achieved by meta-regressions  
30 of studies reporting practices ‘often/always’. Only ‘Arrange referral’ had a significant result,  
31 indicating that year and country could explain some of the heterogeneity, and perhaps  
32 indicating an increased awareness of referral options in later years, or in Australia and New  
33 Zealand. The 21 studies not included in the meta-analysis, revealed few comparable  
34 quantitative studies on HP knowledge, attitudes and the lesser reported practices of BCTs,  
35 and the implementation of all components of the 5As together. On the whole HP knowledge  
36 base might be insufficient about NRT. Poor understanding about the safety or efficacy of  
37 NRT in pregnancy compared to continued smoking may lead to under-prescribing of NRT as  
38 a stop smoking aid, however this is likely to be context sensitive as not all countries  
39 recommend the use of NRT and clinical guidelines vary across time and even within the same  
40  
41  
42  
43  
44  
45  
46  
47  
48  
49  
50  
51  
52  
53  
54  
55  
56  
57  
58  
59  
60

1  
2  
3 country.<sup>17</sup> However, all of the studies in the meta-analysis of NRT were from the USA, and  
4  
5 considerable variation for prescribing NRT is seen within that one country. Access to HP  
6  
7 training for SCC was reported as being limited, and HPs indicated they required more  
8  
9 training.  
10  
11  
12  
13

14 The strength of this study is that, as far as we are aware, it is the broadest and most rigorous  
15  
16 systematic review of HP performance of the 5As in pregnancy, including 7 high-income and  
17  
18 three low to middle income countries and the only review, to our knowledge, to perform a  
19  
20 meta-analysis and meta-regression. We took care to combine outcome measures with like  
21  
22 measures, for each of the 5As, wherever possible. Multiple meta-analyses were performed,  
23  
24 for each combined measure. The high heterogeneity suggests a cautious interpretation of the  
25  
26 results. The review was limited by not being able to determine the cause for the high  
27  
28 heterogeneity in the meta-analyses by our meta-regression, except for 'Arrange referral-  
29  
30 often/always' which was related to year, and country. We recognise that differing clinical  
31  
32 guidelines may have impacted the provision of NRT in pregnancy in some countries. In  
33  
34 particular NRT is not recommended for pregnancy in the USA. Additionally, while most  
35  
36 countries do use the 5As, there are variations, such as ABC (Ask, Brief Advice, Cessation) in  
37  
38 NZ, and Ask, Advise, Action (AAA) in the UK. These have in common the first 2As, and  
39  
40 then a variation to shorten the mnemonic or practice. This variation may be a limitation to  
41  
42 this study. The quality rating revealed aspects of some papers were poor; findings from these  
43  
44 studies may be less reliable. However unresolved discrepancies between the raters indicate a  
45  
46 circumspect interpretation.  
47  
48  
49  
50  
51  
52  
53  
54  
55

56 Two other reviews examined the provision by HP of SCC for pregnant women. Okoli et al's  
57  
58 non-systematic review included 28 studies from 6 high-income countries (USA, Australia,  
59  
60

1  
2  
3 UK, Germany, Canada, and the Netherlands).<sup>27</sup> The review reported that few HPs working  
4 with pregnant women use all the components of the 5As. Although more than 50% of HPs in  
5 the review asked women about their smoking status and advised pregnant smokers to quit,  
6 fewer than 50% assessed motivation, assisted smoking cessation, or arranged follow-up or  
7 referrals. Our review highlighted the diversity of the ways different studies surveyed HPs  
8 about their use of the 5As, but it is unclear from the Okoli review how these estimates were  
9 made. Instead a range was reported for each of the 5As, (for example ‘Ask’ 73-100%;  
10 ‘Assess’ readiness or willingness to make a quit attempt 42-81%) without the reader being  
11 able to determine which studies used Likert scales, if measures were re-categorised, or a  
12 dichotomous Yes/No employed. Baxter et al’s systematic review included 23 papers from 6  
13 high-income countries, one middle-income country (UK, France, Sweden, USA, Australia,  
14 NZ, South Africa) and one multi-nation study, in a qualitative synthesis.<sup>28</sup> Similarly, although  
15 Baxter’s review reports percentages of HP or women giving or receiving different aspects of  
16 the 5As, they do not describe how these questions were asked.<sup>28</sup>

17  
18  
19  
20  
21  
22  
23  
24  
25  
26  
27  
28  
29  
30  
31  
32  
33  
34  
35  
36  
37  
38  
39  
40  
41  
42  
43  
44  
45  
46  
47  
48  
49  
50  
51  
52  
53  
54  
55  
56  
57  
58  
59  
60  
The low rates of reported implementation of components of the 5As may be related to  
barriers at several levels. Okoli et al’s review suggests several important provider-specific,  
patient-specific, and system or organizational barriers hindering the provision of SCC by  
HP.<sup>27</sup> Provider-specific barriers centred around HP self-efficacy or perceived ability to  
provide SCC to pregnant smokers, namely low knowledge, low confidence for counselling  
and use of NRT, the perception that as HPs they could not influence the patient’s smoking  
behaviour, or that SCC was not their role. In the studies in our review, HP practices also  
related to HP knowledge and attitudes (optimism and confidence). Patient-level barriers  
included HP perceptions that pregnant smokers were not interested in quitting, had stressful  
lives, and HPs not wanting to jeopardise their relationship with the pregnant patient by  
raising smoking as an issue. System-level barriers included lack of time, resources, training

1  
2  
3 and protocols, similarly described in our review. Baxter et al's review also reports barriers to  
4 providing SCC: discussing smoking cessation depended on whether HPs were able to broach  
5 the subject, staff confidence and perception of effectiveness, manner of communication,  
6 whether follow-up occurred, time and resource constraints, and service protocols.<sup>28</sup>  
7  
8  
9

10  
11  
12  
13  
14 One of the included Australian studies explained some of the factors that may impinge on the  
15 quality of SCC for pregnant women. Bar-Zeev et al analysed the factors associated with  
16 performance of the 5As, and provision of NRT in Australian medical practitioners.<sup>91</sup> In a  
17 national study of 378 GPs and OBS, 'internal influences' (including HP confidence for  
18 counselling and prescribing NRT, optimism, sufficient time and resources) were associated  
19 with a higher likelihood of performing the 5As, whereas 'external influences' (i.e., workplace  
20 routines, doctor-patient relationship, comfort raising the issue, perceived priority) were  
21 associated with performing the shorter version of Ask, Advise, Refer (AAR).<sup>91,93,94</sup>  
22  
23  
24 Furthermore, being an OBS compared to being a GP, low confidence, and uncertainty about  
25 safety of NRT, were associated with lower odds of prescribing NRT.<sup>92</sup>  
26  
27  
28  
29  
30  
31  
32  
33  
34  
35  
36  
37  
38  
39

40 Our objective to determine which aspects of SCC for pregnant women could need  
41 improvement, revealed on the whole that 'Assist' and Arrange' were less performed.  
42  
43 Assisting pregnant smokers to quit is a vital priority. Unless there are high-quality specialised  
44 services to refer pregnant smokers to, it is insufficient for HPs to raise the issue, advise, and  
45 assess, without going further to actually assist a quit attempt, and as a duty of care arrange  
46 follow up or referral. Psychosocial support coupled with NRT (if needed, available and  
47 approved) may give pregnant women the best chance of quitting.<sup>17,95</sup> Various implementation  
48 strategies could be considered to improve SCC delivery to pregnant women, which may  
49 include HP education and training, promotion of clinical practice guidelines, audit and  
50  
51  
52  
53  
54  
55  
56  
57  
58  
59  
60

1  
2  
3 feedback, reminders, opinion leaders, incentives, or supervision.<sup>96</sup> Training was reported as  
4 an educational need by the HPs in the studies, and worthy of consideration. Training should  
5 most urgently focus on the elements of the 5As that are seldom performed, taking into  
6 account country-specific needs and guidelines. Training should provide actual skills to HPs in  
7 how to assist smokers to quit, and give opportunities to practice and receive feedback on their  
8 performance. Evidence-based updates on the use of NRT in pregnancy may be warranted  
9 especially if professional college guidelines are not up-to-date, with a caution about  
10 jurisdictions that may deter prescribing or access.<sup>17</sup>  
11  
12  
13  
14  
15  
16  
17  
18  
19  
20  
21  
22  
23

24 Providing access to resources, such as educational and training materials for HPs, evidence-  
25 based and culturally-appropriate patient information sources, and affordable NRT, will  
26 demand changes to policy in some settings and countries. Time is a perennial problem for  
27 HPs, however changes in practice protocols, and a whole-of-service approach, could support  
28 pregnant women to receive the time investment warranted by such an important issue for  
29 their own and their baby's health. Additionally, policy changes to provide accessible and  
30 culturally-appropriate referral options are critical. Further research is warranted to understand  
31 which interventions can successfully improve HP performance of the 5As, and whether other  
32 models, such as the AAR,<sup>96</sup> the ABC (Ask, Brief Advice, Cessation),<sup>97</sup> or ABCD (Ask, Brief  
33 Advice, Cessation, Discuss)<sup>98</sup> approach may better facilitate HP implementation of SCC, and  
34 correspondingly improve quit rates in pregnant women. Standardised methods to assess the  
35 provision of SCC and the 5As in research or program evaluations, would aid future  
36 comparisons.  
37  
38  
39  
40  
41  
42  
43  
44  
45  
46  
47  
48  
49  
50  
51  
52  
53  
54  
55

## 56 **Conclusions**

57  
58  
59  
60

1  
2  
3 In a systematic review of HPs' provision of SCC for pregnant women in 10 countries, meta-  
4 analyses were performed after combining like measures across studies where feasible. Pooled  
5 percentages revealed that HPs reliably 'Ask', 'Advise' and 'Assess' pregnant women about  
6 tobacco smoking. 'Assist', including assist by 'prescribing NRT', and 'Arrange referral' were  
7 much lower, and may be improved by appropriate interventions such as training, incentives  
8 or prompts. Meta-regressions were significant only for 'Arrange referral' for year and  
9 country. Further research may be required to understand other factors driving the  
10 heterogeneity between different studies. Standardised methods to assess the provision of SCC  
11 and the 5As are warranted.  
12  
13  
14  
15  
16  
17  
18  
19  
20  
21  
22  
23  
24  
25

26 Author Statement: GSG was responsible for the design of the review, publishing the protocol  
27 in PROSPERO, oversaw all aspects of the study and wrote the manuscript. LT conducted the  
28 searches with YB. LS did the data extraction, and with YB the quality analysis. KP  
29 conducted the meta-analyses and meta-regressions. GRG assisted GSG in writing the  
30 methods and results sections, and preparing tables. BB advised on study design and critically  
31 reviewed the manuscript. YBZ advised on manuscript drafts as senior author. All authors  
32 reviewed and approved the final manuscript.  
33  
34  
35  
36  
37  
38  
39  
40  
41  
42  
43  
44

#### 45 Declaration of interests

46 GSG reports grants from National Health and Medical Research Council, grants from Cancer  
47 Institute New South Wales, grants from Hunter Cancer Research Alliance, during the  
48 conduct of the study; grants from National Health and Medical Research Council, grants  
49 from Hunter New England Central Coast Primary Health Network, grants from Cancer  
50 Australia and Cure Cancer Australia , grants from Ministry of Health NSW , grants from  
51 John Hunter Hospital Charitable Trust, outside the submitted work. YB reports grants and  
52  
53  
54  
55  
56  
57  
58  
59  
60



1  
2  
3 others from Hunter Cancer Research Alliance, during the conduct of the study; personal fees  
4  
5 from Novartis NCH, personal fees from Pfizer Israel LTD, outside the submitted work. No  
6  
7 other authors declare a conflict of interest.  
8  
9

10  
11  
12 Data Statement: All data relevant to the study are included in the article or uploaded as  
13  
14 supplementary information  
15  
16

17  
18  
19 Acknowledgements: This study was funded by a grant from Hunter Cancer Research  
20  
21 Alliance, Australia. The funder of the study had no role in study design, data collection, data  
22  
23 analysis, data interpretation, or writing of the report. The corresponding author had full  
24  
25 access to all the data in the study and had final responsibility for the decision to submit for  
26  
27 publication.  
28  
29  
30  
31  
32  
33  
34  
35  
36  
37  
38  
39  
40  
41  
42  
43  
44  
45  
46  
47  
48  
49  
50  
51  
52  
53  
54  
55  
56  
57  
58  
59  
60

## References

1. Hofhuis W, De Jongste J, Merkus P. Adverse health effects of prenatal and postnatal tobacco smoke exposure on children. *Archives of disease in childhood* 2003; **88**(12): 1086-90.
2. U.S. Department of Health and Human Services. The Health Consequences of Smoking—50 Years of Progress: A Report of the Surgeon General. Rockville, MD: Public Health Service Office of the Surgeon General; 2014.
3. Cornelius MD, Leech SL, Goldschmidt L, Day NL. Prenatal tobacco exposure: is it a risk factor for early tobacco experimentation? *Nicotine Tob Res* 2000; **2**(1): 45-52.
4. Lange S, Probst C, Rehm J, Popova S. National, regional, and global prevalence of smoking during pregnancy in the general population: a systematic review and meta-analysis. *The Lancet Global Health* 2018.
5. McBride CM, Emmons KM, Lipkus IM. Understanding the potential of teachable moments: the case of smoking cessation. *Health education research* 2003; **18**(2): 156-70.
6. Schneider S, Huy C, Schuetz J. Smoking cessation during pregnancy: a systematic literature review. *Drug and Alcohol Review* 2010; **29**(1): 81-90.
7. Gould GS, Patten C, Glover M, Kira A, Jayasinghe H. Smoking in Pregnancy Among Indigenous Women in High-Income Countries: A Narrative Review. *Nicotine & Tobacco Research* 2017; **19**(5): 506-17.
8. Bottorf JL, Poole N, Kelly MT, Greaves L, Marcellus L, Jung M. Tobacco and alcohol use in the context of adolescent pregnancy and postpartum: a scoping review of the literature. *Health & Social Care in the Community* 2014; **22**(6): 561-74.
9. Rhodes-Keefe JM. Depression and smoking in the pregnant rural population: A Literature Review. *Online Journal of Rural Nursing & Health Care* 2015; **15**(1): 60-73.
10. Flemming K, Graham H, Heirs M, Fox D, Sowden A. Smoking in pregnancy: a systematic review of qualitative research of women who commence pregnancy as smokers. *Journal of Advance Nursing* 2013; **69**(5): 1023-36.
11. Flemming K, McCaughan D, Angus K, Graham H. Qualitative systematic review: barriers and facilitators to smoking cessation experienced by women in pregnancy and following childbirth. *Journal of Advanced Nursing* 2014.
12. Crane CA, Hawes SW, Weinberger AH. Intimate partner violence victimization and cigarette smoking: a meta-analytic review. *Trauma Violence & Abuse* 2013; **14**(4): 305-15.
13. Gould GS, Bovill M, Clarke MJ, Gruppetta M, Cadet-James Y, Bonevski B. Chronological narratives from smoking initiation through to pregnancy of Indigenous Australian women: a qualitative study *Midwifery* 2017; **52**: 27-33.
14. Graham H, Flemming K, Fox D, Heirs M, Sowden A. Cutting down: insights from qualitative studies of smoking in pregnancy. *Health & Social Care in the Community* 2013; **22**(3): 259-67.
15. Ingall G, Cropley M. Exploring the barriers of quitting smoking during pregnancy: A systematic review of qualitative studies. *Women and Birth* 2010; **23**(2): 45-52.
16. Bovill M, Gruppetta M, Cadet-James Y, Clarke M, Bonevski B, Gould GS. Wula (Voices) of Aboriginal women on barriers to accepting smoking cessation support during pregnancy: Findings from a qualitative study. *Women and Birth* 2017.
17. Bar-Zeev Y, Lim LL, Bonevski B, Gruppetta M, Gould GS. Nicotine replacement therapy for smoking cessation in pregnancy. *Med J Aust* 2018; **208**(1): 1.
18. Stead LF, Lancaster T. Combined pharmacotherapy and behavioural interventions for smoking cessation. *Cochrane Database of Systematic Reviews* 2012, Issue 10 Art No: CD008286 2012.
19. Gould GS, Lim LL, Mattes J. Prevention and Treatment of Smoking and Tobacco Use During Pregnancy in Selected Indigenous Communities in High-Income Countries of the United States, Canada, Australia, and New Zealand. *CHEST* 2017; **152**(4): 853-66.

20. American College of Obstetricians and Gynecologists. Committee opinion no. 471: smoking cessation during pregnancy. *Obstet Gynecol* 2010; **116**(1241-1244).
21. Brose LS, McEwen, A. & West, R. Association between nicotine replacement therapy use in pregnancy and smoking cessation *Drug and Alcohol Dependence* 2013; **132**(3): 660-4.
22. NICE. Quitting smoking in pregnancy and following childbirth - NICE public health guidance 26. Manchester National Institute for Health and Clinical Excellence; 2010.
23. Zwar N, Richmond, R, Borland, R, Peters, M, Litt, J, Bell, J, Caldwell, B, Ferretter, I. Supporting smoking cessation: a guide for health professionals Melbourne: The Royal Australian College of General Practitioners; 2011 [Updated July 2014].
24. Ministry of Health. Background and recommendations of the New Zealand guidelines for helping people to stop smoking. . 2014.  
<https://www.health.govt.nz/system/files/documents/publications/backgroundrecommendations-new-zealand-guidelines-for-helpingstop-smoking-mar15-v2.pdf>
25. Canadian Action Network for the Advancement. Dissemination and adoption of practice-informed tobacco treatment. Canadian smoking cessation clinical practice guideline. 2011.  
<https://www.peelregion.ca/health/professionals/events/pdf/2013/canadappt-summary-statements.pdf> (accessed May 2017).
26. Fiore MC BW, Cohen SJ, Dorfman SF, Goldstein MG, Gritz ER, et al,. Smoking Cessation Clinical Practice Guidelines No. 18. Rockville, MD: U.S. Department of Human and Health Services, Public Health Service, Agency for Health Care Policy and Research, 1996.
27. Okoli CTC, Greaves L, Bottorff JL, Marcellus LM. Health care providers' engagement in smoking cessation with pregnant smokers. *JOGNN: Journal of Obstetric, Gynecologic & Neonatal Nursing* 2010; **39**(1): 64-77.
28. Baxter S, Everson-Hock E, Messina J, Guillaume L, Burrows J, Goyder E. Factors relating to the uptake of interventions for smoking cessation among pregnant women: a systematic review and qualitative synthesis. *Nicotine & tobacco research : official journal of the Society for Research on Nicotine and Tobacco* 2010; **12**(7): 685-94.
29. Siddiqi K, Mdege N. A global perspective on smoking during pregnancy. *The Lancet Global Health* 2018.
30. Michie S, Wood C, Johnston M, Abraham C, Francis J, Hardeman W. Chapter 1, General introduction. Behaviour change techniques: the development and evaluation of a taxonomic method for reporting and describing behaviour change interventions (a suite of five studies involving consensus methods, randomised controlled trials and analysis of qualitative data) Southampton, UK: NIHR Journals Library; 2015. p. 1-5.
31. Lorençatto F, West R, Michie S. Specifying evidence-based behavior change techniques to aid smoking cessation in pregnancy. *Nicotine & Tobacco Research* 2012; **14**(9): 1019-26.
32. Campbell KA, Cooper S, Fahy SJ, et al. 'Opt-out' referrals after identifying pregnant smokers using exhaled air carbon monoxide: impact on engagement with smoking cessation support. *Tob Control* 2017; **26**(3): 300-6.
33. Stroup DF, Berlin JA, Morton SC, et al. Meta-analysis of observational studies in epidemiology: a proposal for reporting. Meta-analysis Of Observational Studies in Epidemiology (MOOSE) group. *JAMA* 2000; **283**(15): 2008-12.
34. Hawker S, Payne S, Kerr C, Hardey M, Powell J. Appraising the evidence: reviewing disparate data systematically. *Qualitative health research* 2002; **12**(9): 1284-99.
35. Borenstein M, Hedges LV, Higgins JPT, Rothstein HR. A basic introduction to fixed-effect and random-effects models for meta-analysis. *Res Synth Method* 2010; (1): 97-111.
36. Altman DG. Practical statistics for medical research: CRC press; 1990.
37. Bar-Zeev Y, Bonevski B, Twyman L, et al. Opportunities missed: A Cross-Sectional Survey of the Provision of Smoking Cessation Care to Pregnant Women by Australian General Practitioners and Obstetricians. *Nic & Tob Res* 2017; **19**(5): 636-41.
38. Abatemarco DJ, Steinberg MB, Delnevo DC. Midwives' Knowledge, Perceptions, Beliefs, and Practice Supports Regarding Tobacco Dependence Treatment. *Journal of Midwifery and Women's Health* 2007; **52**(5): 451-7.
39. Amarin ZO. Obstetricians, gynecologists and the anti-smoking campaign: A national survey. *European Journal of Obstetrics Gynecology and Reproductive Biology* 2005; **119**(2): 156-60.

- 1  
2  
3 40. Bakker MJ, De Vries H, Mullen PD, Kok G. Predictors of perceiving smoking cessation  
4 counselling as a midwife's role: A survey of Dutch midwives. *European journal of public health*  
5 2005; **15**(1): 39-42.
- 6 41. Beenstock J, Sniehotta FF, White M, Bell R, Milne EM, Araujo-Soares V. What helps and  
7 hinders midwives in engaging with pregnant women about stopping smoking? A cross-sectional  
8 survey of perceived implementation difficulties among midwives in the North East of England.  
9 *Implementation Science* 2012; **7**: 36.
- 10 42. Berrueta M, Morello P, Alemán A, et al. Smoking Patterns and Receipt of Cessation Services  
11 Among Pregnant Women in Argentina and Uruguay. *Nicotine & Tobacco Research* 2016; **18**(5):  
12 1116-25.
- 13 43. Bonollo DP, Zapka JG, Stoddard AM, Ma Y, Pbert L, Ockene JK. Treating nicotine  
14 dependence during pregnancy and postpartum: understanding clinician knowledge and performance.  
15 *Patient Education & Counseling* 2002; **48**(3): 265-74.
- 16 44. Bull L, Whitehead E. Smoking cessation intervention with pregnant women and new parents:  
17 a survey of health visitors, midwives and practice nurses. *Journal of Neonatal Nursing* 2006; **12**(6):  
18 209-15.
- 19 45. Castrucci BC, Culhane JF, Chung EK, Bennett I, McCollum KF. Smoking in pregnancy:  
20 patient and provider risk reduction behavior. *Journal of Public Health Management & Practice* 2006;  
21 **12**(1): 68-76.
- 22 46. Chang JC, Dado D, Frankel RM, et al. When pregnant patients disclose substance use: missed  
23 opportunities for behavioral change counseling. *Patient education and counseling* 2008; **72**(3): 394-  
24 401.
- 25 47. Chang JC, Alexander SC, Holland CL, et al. Smoking is bad for babies: obstetric care  
26 providers' use of best practice smoking cessation counseling techniques. *American journal of health*  
27 *promotion : AJHP* 2013; **27**(3): 170-6.
- 28 48. Clasper P, White M. Smoking cessation interventions in pregnancy: practice and views of  
29 midwives, GPs and obstetricians. *Health Education Journal* 1995; **54**(2): 150-62.
- 30 49. Coleman-Cowger VH, Anderson BL, Mahoney J, Schulkin J. Smoking cessation during  
31 pregnancy and postpartum: Practice patterns among obstetrician-gynecologists. *Journal of Addiction*  
32 *Medicine* 2014; **8**(1): 14-24.
- 33 50. Condliffe L, McEwen A, West R. The attitude of maternity staff to, and smoking cessation  
34 interventions with, childbearing women in London. *Midwifery* 2005; **21**(3): 233-40.
- 35 51. Cooke M, Mattick RP, Barclay L. Predictors of brief smoking intervention in a midwifery  
36 setting. *Addiction* 1996; **91**(11): 1715-25.
- 37 52. Eiser J, Main N, Lee A, Hajek P. Midwife attitudes and advice to pregnant smokers.  
38 *Addiction Research* 1999; **7**(4): 355-68.
- 39 53. England LJ, Anderson BL, Tong VT, et al. Screening practices and attitudes of obstetricians-  
40 gynecologists toward new and emerging tobacco products. *American journal of obstetrics and*  
41 *gynecology* 2014; **211**(6): 695.e1-7.
- 42 54. Floyd RL, Belodoff B, Sidhu J, Schulkin J, Ebrahim SH, Sokol RJ. A survey of obstetrician-  
43 gynecologists on their patients' use of tobacco and other drugs during pregnancy. *Prenatal and*  
44 *Neonatal Medicine* 2001; **6**(4): 201-7.
- 45 55. Glover M, Paynter J, Bullen C, Kristensen K. Supporting pregnant women to quit smoking:  
46 Postal survey of New Zealand general practitioners and midwives' smoking cessation knowledge and  
47 practices. *New Zealand Medical Journal* 2008; **121**(1270): 53-64.
- 48 56. Grange G, Vayssiere C, Borgne A, et al. Characteristics of tobacco withdrawal in pregnant  
49 women. *European Journal of Obstetrics, Gynecology, & Reproductive Biology* 2006; **125**(1): 38-43.
- 50 57. Grimley DM, Bellis JM, Raczynski JM, Henning K. Smoking cessation counseling practices:  
51 a survey of Alabama obstetrician-gynecologists. *South Med J* 2001; **94**(3): 297-303.
- 52 58. Hartmann KE, Wechter ME, Payne P, Salisbury K, Jackson RD, Melvin CL. Best practice  
53 smoking cessation intervention and resource needs of prenatal care providers. *Obstetrics and*  
54 *Gynecology* 2007; **110**(4): 765-70.
- 55 59. Helwig AL, Swain GR, Gottlieb M. Smoking cessation intervention: the practices of  
56 maternity care providers. *The Journal of the American Board of Family Practice / American Board of*  
57 *Family Practice* 1998; **11**(5): 336-40.



60. Herbert R, Coleman T, Britton J. U.K. general practitioners' beliefs, attitudes, and reported prescribing of nicotine replacement therapy in pregnancy. *Nicotine and Tobacco Research* 2005; **7**(4): 541-6.
61. Hickner J, Cousineau A, Messimer S. Smoking cessation during pregnancy: strategies used by Michigan family physicians. *The Journal of the American Board of Family Practice / American Board of Family Practice* 1990; **3**(1): 39-42.
62. Hoekzema L, Werumeus Buning A, Bonevski B, et al. Smoking rates and smoking cessation preferences of pregnant women attending antenatal clinics of two large Australian maternity hospitals. *The Australian & New Zealand journal of obstetrics & gynaecology* 2014; **54**(1): 53-8.
63. Howard L, Rowe M, Bewley S, Marteau T, Demilew J. Smoking cessation in pregnant women with mental disorders: A cohort and nested qualitative study. *European Psychiatry* 2013; **28**.
64. Jones D. Changing practice. Exploring the value of smoking cessation advice. *British Journal of Midwifery* 2003; **11**(4): 212-5.
65. Jordan TR, Dake JA, Price JH. Best practice for smoking cessation in pregnancy: Do obstetrician/gynecologists use them in practice? *Journal of Women's Health* 2006; **15**(4): 400-11.
66. Lemola S, Meyer-Leu Y, Samochowiec J. Control Beliefs Are Related to Smoking Prevention in Prenatal Care. *Inside Childbirth Education* 2012: 7-.
67. Mabbutt J, Bauman A, Moshin M. Tobacco use of pregnant women and their male partners who attend antenatal classes: What happened to routine quit smoking advice in pregnancy? *Australian and New Zealand journal of public health* 2002; **26**(6): 571-2.
68. McEwen A, West R, Mitchell S, Ussher M. Problems identifying pregnant smokers. *British Journal of Midwifery* 2003; **11**(11): 648-.
69. Mejia R, Martinez VG, Gregorich SE, Perez-Stable EJ. Physician counseling of pregnant women about active and secondhand smoking in Argentina. *Acta Obstet Gynecol Scand* 2010; **89**(4): 490-5.
70. Moran S, Thorndike AN, Armstrong K, Rigotti NA. Physicians' missed opportunities to address tobacco use during prenatal care. *Nicotine and Tobacco Research* 2003; **5**(3): 363-8.
71. Mullen PD, Pollak KI, Titus JP, Sockrider MM, May JG. Prenatal smoking cessation counselling by Texas obstetricians. *Birth: Issues in Perinatal Care* 1998; **25**(1): 25-31.
72. Murphy K, Steyn K, Mathews C. The midwife's role in providing smoking cessation interventions for pregnant women: The views of midwives working with high risk, disadvantaged women in public sector antenatal services in South Africa. *International Journal of Nursing Studies* 2016; **53**: 228-37.
73. Oncken CA, Pbert L, Ockene JK, Zapka J, Stoddard A. Nicotine replacement prescription practices of obstetric and pediatric clinicians. *Obstetrics and Gynecology* 2000; **96**(2): 261-5.
74. Owen L, McNeill A. The role of health professionals in reducing smoking in pregnancy. *Contemporary Reviews in Obstetrics and Gynaecology* 1999; **11**(4): 235-8.
75. Passey ME, D'Este CA, Sanson-Fisher RW. Knowledge, attitudes and other factors associated with assessment of tobacco smoking among pregnant Aboriginal women by health care providers: a cross-sectional survey. *BMC public health* 2012; **12**: 165.
76. Passey ME, Sanson-Fisher RW. Provision of antenatal smoking cessation support: A survey with pregnant Aboriginal and Torres Strait Islander women. *Nicotine & Tobacco Research* 2015; **17**(6): 746-9.
77. Passey ME, Sanson-Fisher RW, Stirling JM. Supporting pregnant Aboriginal and Torres Strait Islander women to quit smoking: views of antenatal care providers and pregnant indigenous women. *Maternal and child health journal* 2014; **18**(10): 2293-9.
78. Price JH, Jordan TR, Dake JA. Obstetricians and gynecologists' perceptions and use of nicotine replacement therapy. *J Community Health* 2006; **31**(3): 160-75.
79. Price JH, Jordan TR, Dake JA. Perceptions and Use of Smoking Cessation in Nurse-Midwives' Practice. *Journal of Midwifery and Women's Health* 2006; **51**(3): 208-15.
80. Pullon S, Webster M, McLeod D, Benn C, Morgan S. Smoking cessation and nicotine replacement therapy in current primary maternity care. *Australian family physician* 2004; **33**(1-2): 94-6.

- 1  
2  
3 81. Röske K, Hannöver W, Thyrian JR, John U, Hannich HJ. Smoking cessation counselling for  
4 pregnant and postpartum women among midwives, gynaecologists and paediatricians in Germany.  
5 *International journal of environmental research and public health* 2009; **6**(1): 96-107.
- 6 82. Solberg LI, Parker ED, Foldes SS, Walker PF. Disparities in tobacco cessation medication  
7 orders and fills among special populations. *Nicotine & tobacco research : official journal of the*  
8 *Society for Research on Nicotine and Tobacco* 2010; **12**(2): 144-51.
- 9 83. Tappin DM, MacAskill S, Bauld L, Eadie D, Shipton D, Galbraith L. Smoking prevalence  
10 and smoking cessation services for pregnant women in Scotland. *Substance abuse treatment,*  
11 *prevention, and policy* 2010; **5**: 1.
- 12 84. Thyrian JR, Hannover W, Roske K, Scherbarth S, Hapke U, John U. Midwives' attitudes to  
13 counselling women about their smoking behaviour during pregnancy and postpartum. *Midwifery*  
14 2006; **22**(1): 32-9.
- 15 85. Tong VT, England LJ, Dietz PM, Asare LA. Smoking patterns and use of cessation  
16 interventions during pregnancy. *American journal of preventive medicine* 2008; **35**(4): 327-33.
- 17 86. Tran ST, Rosenberg KD, Carlson NE. Racial/ethnic disparities in the receipt of smoking  
18 cessation interventions during prenatal care. *Maternal and child health journal* 2010; **14**(6): 901-9.
- 19 87. Tzelepis F, Daly J, Dowe S, Bourke A, Gillham K, Freund M. Supporting Aboriginal Women  
20 to Quit Smoking: Antenatal and Postnatal Care Providers' Confidence, Attitudes, and Practices.  
21 *Nicotine & Tobacco Research* 2017; **19**(5): 642-6.
- 22 88. Walsh RA, Redman S, Brinsmead MW, Arnold B. Smoking cessation in pregnancy: A survey  
23 of the medical and nursing directors of public antenatal clinics in Australia. *Australian and New*  
24 *Zealand Journal of Obstetrics and Gynaecology* 1995; **35**(2): 144-50.
- 25 89. Zapka JG, Pbert L, Stoddard AM, Ockene JK, Goins KV, Bonollo D. Smoking cessation  
26 counseling with pregnant and postpartum women: a survey of community health center providers.  
27 *American journal of public health* 2000; **90**(1): 78-84.
- 28 90. Cooke M, Mattick RP, Campbell E. The influence of individual and organizational factors on  
29 the reported smoking intervention practices of staff in 20 antenatal clinics. *Drug and Alcohol Review*  
30 1998; **17**(2): 175-85.
- 31 91. Bar-Zeev Y, Bonevski B, Twyman L, et al. Opportunities Missed: A Cross-Sectional Survey  
32 of the Provision of Smoking Cessation Care to Pregnant Women by Australian General Practitioners  
33 and Obstetricians. *Nicotine & Tobacco Research* 2017; **19**(5): 636-41.
- 34 92. Bar-Zeev Y, Bonevski B, Gruppetta M, et al. Clinician factors associated with prescribing  
35 nicotine replacement therapy in pregnancy: A cross-sectional survey of Australian obstetricians and  
36 general practitioners. *Australian and New Zealand Journal of Obstetrics and Gynaecology* 2017.
- 37 93. Vidrine JI, Shete S, Cao Y, et al. Ask-Advise-Connect: a new approach to smoking treatment  
38 delivery in health care settings. *JAMA internal medicine* 2013; **173**(6): 458-64.
- 39 94. Crane R. The most addictive drug, the most deadly substance: smoking cessation tactics for  
40 the busy clinician. *Primary Care: Clinics in Office Practice* 2007; **34**(1): 117-35.
- 41 95. Chamberlain C, O'Mara-Eves A, Porter J, et al. Psychosocial interventions for supporting  
42 women to stop smoking in pregnancy. *Cochrane Database of Systematic Reviews* 2017, Issue 2 Art  
43 No: CD001055 2017.
- 44 96. Cochrane Collaboration. Effective Practice and Organisation of Care (EPOC). 2015.  
45 <https://epoc.cochrane.org/epoc-taxonomy2018>.
- 46 97. Ministry of Health. Implementing the ABC approach for smoking cessation: Framework and  
47 work programme. Wellington, New Zealand: Ministry of Health, 2009.
- 48 98. Gould GS, Bittoun R, Clarke MJ. A Pragmatic Guide for Smoking Cessation Counselling and  
49 the Initiation of Nicotine Replacement Therapy for Pregnant Aboriginal and Torres Strait Islander  
50 Smokers. *Journal of Smoking Cessation* 2015; **10**: 96-105.
- 51  
52  
53  
54  
55  
56  
57  
58  
59  
60

## Figure Legends:

1  
2  
3  
4  
5  
6  
7  
8  
9

**Figure 1: Prisma Flow Chart of included studies**

10  
11  
12  
13  
14  
15  
16  
17  
18  
19  
20  
21  
22

**Figure 2: Comparison of pooled percentages of selected categories of ‘often/always’**

23  
24  
25

**Tables**

26  
27

**Table 1: Meta-regression analysis of HP practices performed ‘often/always’**

| Predictors                  | ASK   | ADVISE | ASSIST | ARRANGE | NRT   |
|-----------------------------|-------|--------|--------|---------|-------|
| <i>N</i> studies            | 9     | 7      | 5***   | 6       | 6     |
| No predictors               |       |        |        |         |       |
| <i>I</i> <sup>2</sup> resid | 96%   | 91.9%  | 72.9%  | 95.9%   | 97%   |
| $\tau^2$                    | 0.008 | 0.0304 | 0.003  | 0.019   | 0.017 |
| Provider type               |       |        |        |         |       |
| p-value                     | 0.18  | 0.487  | 0.134  | 0.898   | 0.304 |
| <i>I</i> <sup>2</sup> resid | 95.6% | 87.7%  |        | 97.4%   | 94.8% |
| $\tau^2$                    | 0.006 | 0.031  |        | 0.029   | 0.013 |
| High risk                   |       |        |        |         |       |
| p-value                     | 0.909 | **     | 0.43   | 0.62    | **    |
| <i>I</i> <sup>2</sup> resid | 96.4% |        |        | 96.7%   |       |
| $\tau^2$                    | 0.009 |        |        | 0.021   |       |
| Country                     |       |        |        |         |       |
| p-value                     | 0.845 | 0.252  | 0.185  | 0.037   | 0.903 |
| <i>I</i> <sup>2</sup> resid | 96.5% | 89.4%  |        | 84.5%   | 97.6% |
| $\tau^2$                    | 0.012 | 0.022  |        | 0.006   | 0.021 |
| Year                        |       |        |        |         |       |
| p-value                     | *     | *      | *      | 0.013   | *     |
| <i>r</i> <sup>2</sup> resid |       |        |        | 73.9%   |       |

\* non-linear, model not performed, \*\* no high risk populations, \*\*\*too few studies, *I*<sup>2</sup> and  $\tau^2$  not available

**Table 2: Quality assessment of 54 included studies**

| <b>Author (year)</b>  | <b>Abstract and title</b> | <b>Intro and aims</b> | <b>Method and data</b> | <b>Sampling</b> | <b>Data analysis</b> | <b>Ethics and bias</b> | <b>Results</b> | <b>Transferability</b> | <b>Implications and usefulness</b> |
|-----------------------|---------------------------|-----------------------|------------------------|-----------------|----------------------|------------------------|----------------|------------------------|------------------------------------|
| Abatemarco (2007)     | Good                      | Good                  | Fair                   | Good            | Fair                 | Fair                   | Poor           | Good                   | Good                               |
| Amarin (2005)         | Poor                      | Fair                  | Poor                   | Poor            | Poor                 | Poor                   | Poor           | Poor                   | Fair                               |
| Bakker (2005)         | Fair                      | Fair                  | Fair                   | Fair            | Fair                 | Poor                   | Fair           | Fair                   | Fair                               |
| Bar Zeev (2017)       | Good                      | Good                  | Good                   | Good            | Fair                 | Fair                   | Good           | Fair                   | Good                               |
| Beenstock (2012)      | Good                      | Good                  | Good                   | Good            | Good                 | Fair                   | Good           | Good                   | Good                               |
| Berruetas (2016)      | Fair                      | fair                  | Fair                   | Good            | Fair                 | Fair                   | Good           | Good                   | Good                               |
| Bonollo (2002)        | Good                      | Good                  | Good                   | Fair            | Good                 | Good                   | Fair           | Fair                   | Fair                               |
| Bull (2006)           | Fair                      | Fair                  | Fair                   | Fair            | Fair                 | Good                   | Good           | Fair                   | Good                               |
| Castrucci (2006)      | Fair                      | Fair                  | Fair                   | Fair            | Fair                 | Very poor              | Fair           | Fair                   | Fair                               |
| Chang (2008)          | Good                      | Good                  | Good                   | Fair            | Fair                 | Good                   | Fair           | Fair                   | Fair                               |
| Chang (2013)          | Fair                      | Good                  | Good                   | Fair            | Good                 | Good                   | Fair           | Fair                   | Good                               |
| Clasper (1995)        | Fair                      | Fair                  | Fair                   | Fair            | Fair                 | Fair                   | Fair           | Fair                   | Fair                               |
| Coleman-Cowger (2014) | Good                      | Fair                  | Good                   | Good            | Fair                 | Very poor              | Fair           | Fair                   | Good                               |
| Condcliffe (2005)     | Good                      | Fair                  | Good                   | Fair            | Fair                 | Fair                   | Fair           | Fair                   | Fair                               |
| Cooke (1996)          | Good                      | Fair                  | Fair                   | Good            | Good                 | Fair                   | Good           | Good                   | Good                               |



1  
2  
3  
4  
5  
6  
7  
8  
9  
10  
11  
12  
13  
14  
15  
16  
17  
18  
19  
20  
21  
22  
23  
24  
25  
26  
27  
28  
29  
30  
31  
32  
33  
34  
35  
36  
37  
38  
39  
40  
41  
42  
43  
44  
45  
46  
47  
48  
49  
50  
51  
52  
53  
54  
55  
56  
57  
58  
59  
60

|                 |      |      |      |           |      |      |      |      |      |
|-----------------|------|------|------|-----------|------|------|------|------|------|
| Cooke (1998)    | Fair | Fair | Fair | Fair      | Good | Fair | Fair | Fair | Fair |
| Eiser (1999)    | Fair | Fair | Fair | Fair      | Fair | Poor | Fair | Fair | Fair |
| England (2014)  | Good | Good | Fair | Good      | Good | Good | Good | Good | Good |
| Floyd (2001)    | Fair | Fair | Fair | Poor      | Fair | Fair | Fair | Poor | Fair |
| Glover (2008)   | Fair | Fair | Poor | Fair      | Poor | Fair | Fair | Fair | Fair |
| Grange (2006)   | Poor | Fair | Poor | Fair      | Fair | Poor | Fair | Fair | Fair |
| Grimley (2001)  | Good | Good | Good | Good      | Fair | Good | Good | Fair | Good |
| Hartmann (2007) | Good | Good | Good | Fair      | Fair | Good | Good | Fair | Fair |
| Helwig (1998)   | Good | Fair | Fair | Fair      | Fair | Fair | Fair | Fair | Fair |
| Herbert (2005)  | Fair | Fair | Fair | Fair      | Fair | Fair | Fair | Fair | Fair |
| Hickner (1990)  | Fair | Poor | Fair | Fair      | Fair | Poor | Fair | Fair | Fair |
| Hoekzema (2014) | Good | Good | Good | Good      | Fair | Fair | Good | Good | Fair |
| Howard (2013)   | Good | Good | Good | Good      | Good | Good | Good | Fair | Good |
| Jones (2003)    | Good | Good | Fair | Fair      | Fair | Fair | Fair | Fair | Fair |
| Jordan (2006)   | Fair | Fair | Fair | Fair      | Fair | Poor | Fair | Fair | Good |
| Lemola (2012)   | Good | Good | Good | Good      | Good | Fair | Good | Good | Good |
| Mabbutt (2002)  | Good | Good | Fair | Poor      | Fair | Fair | Good | Poor | Fair |
| McEwen (2003)   | NA   | NA   | NA   | NA        | NA   | NA   | NA   | NA   | NA   |
| Mejia (2010)    | Good | Fair | Fair | Good      | Fair | Poor | Fair | Fair | Good |
| Moran (2003)    | Fair | Good | Good | Good      | Good | Poor | Good | Good | Good |
| Mullen (1998)   | Fair | Good | Fair | Fair      | Good | Poor | Fair | Fair | Fair |
| Murphy (2016)   | Fair | Fair | Fair | Good      | Fair | Good | Fair | Good | Good |
| Oncken (2000)   | Good | Fair | Good | Good      | Good | Poor | Good | Good | Fair |
| Owen (1999)     | Poor | Fair | Poor | Very poor | Poor | Poor | Poor | Fair | Fair |
| Passey (2012)   | Good | Fair | Fair | Fair      | Fair | Fair | Fair | Fair | Good |
| Passey (2015)   | Fair | Fair | Good | Fair      | Fair | Fair | Fair | Fair | Fair |
| Passey (2014)   | Fair | Fair | Fair | Fair      | Good | Fair | Good | Fair | Good |
| Price (2006)    | Good | Fair | Good | Fair      | Good | Poor | Good | Fair | Good |
| Price (2006)    | Good | Fair | Fair | Fair      | Fair | Fair | Fair | Fair | Fair |
| Pullon (2004)   | Fair | Fair | Fair | Fair      | Fair | Poor | Fair | Fair | Fair |
| Roske (2009)    | Good | Good | Fair | Good      | Good | Fair | Good | Good | Fair |
| Solberg (2010)  | Good | Good | Good | Good      | Good | Good | Good | Good | Good |
| Tappin (2010)   | Fair | Fair | Fair | Good      | Poor | Fair | Fair | Fair | Fair |
| Thyrian (2006)  | Good | Good | Good | Good      | Good | Good | Good | Good | Good |
| Tong (2008)     | Good | Good | Fair | Good      | Fair | Poor | Fair | Good | Fair |
| Tran (2010)     | Good | Fair | Good | Good      | Good | Fair | Good | Good | Good |
| Tzelepis (2017) | Good | Fair | Good | Good      | Good | Good | Good | Good | Good |

|              |      |      |      |      |      |      |      |      |      |
|--------------|------|------|------|------|------|------|------|------|------|
| Walsh (1995) | Good | Fair | Good | Fair | Fair | Fair | Good | Fair | Fair |
| Zapka (2000) | Good | Fair | Good | Fair | Good | Fair | Good | Fair | Fair |

NA – not applicable as was a letter to the Editor

**Table 3: Findings from agreement of quality rating analysis of coders using the Hawker tool**

| <i>Study Criteria</i>       | <i>Mean Rating (SD)</i> |                | <i>Agreement</i>               |                  |
|-----------------------------|-------------------------|----------------|--------------------------------|------------------|
|                             | <i>Rater 1</i>          | <i>Rater 2</i> | <i>Weighted kappa (95% CI)</i> | <i>Agreement</i> |
| Abstract and title          | 2.4 (0.6)               | 2.3 (0.6)      | 0.13 (-0.41, 0.68)             | Poor             |
| Intro and aims              | 2.3 (0.5)               | 2.1 (0.3)      | 0.25 (-0.17, 0.67)*            | Fair             |
| Method and data             | 2.2 (0.6)               | 2.3 (0.6)      | -0.15 (-0.74, 0.43)            | Poor             |
| Sampling                    | 2.1 (0.8)               | 2.3 (0.6)      | 0.43 (0.10, 0.76)              | Moderate         |
| Data analysis               | 2.1 (0.6)               | 2.1 (0.5)      | 0.51 (0.03, 0.99)              | Moderate         |
| Ethics and bias             | 1.9 (0.8)               | 1.9 (1.0)      | 0.38 (0.13, 0.63)              | Fair             |
| Results                     | 2.3 (0.7)               | 2.4 (0.5)      | 0.26 (-0.11, 0.62)             | Fair             |
| Transferability             | 2.2 (0.4)               | 2.3 (0.6)      | 0.21 (-0.19, 0.61)             | Fair             |
| Implications and usefulness | 2.4 (0.6)               | 2.5 (0.6)      | 0.58 (0.18, 0.98)              | Moderate         |

\*only 2 levels, therefore Kappa rather than weighted Kappa used

1  
2  
3  
4  
5  
6  
7  
8  
9  
10  
11  
12  
13  
14  
15  
16  
17  
18  
19  
20  
21  
22  
23  
24  
25  
26  
27  
28  
29  
30  
31  
32  
33  
34  
35  
36  
37  
38  
39  
40  
41  
42  
43  
44  
45  
46  
47  
48  
49  
50  
51  
52  
53  
54  
55  
56  
57  
58  
59  
60

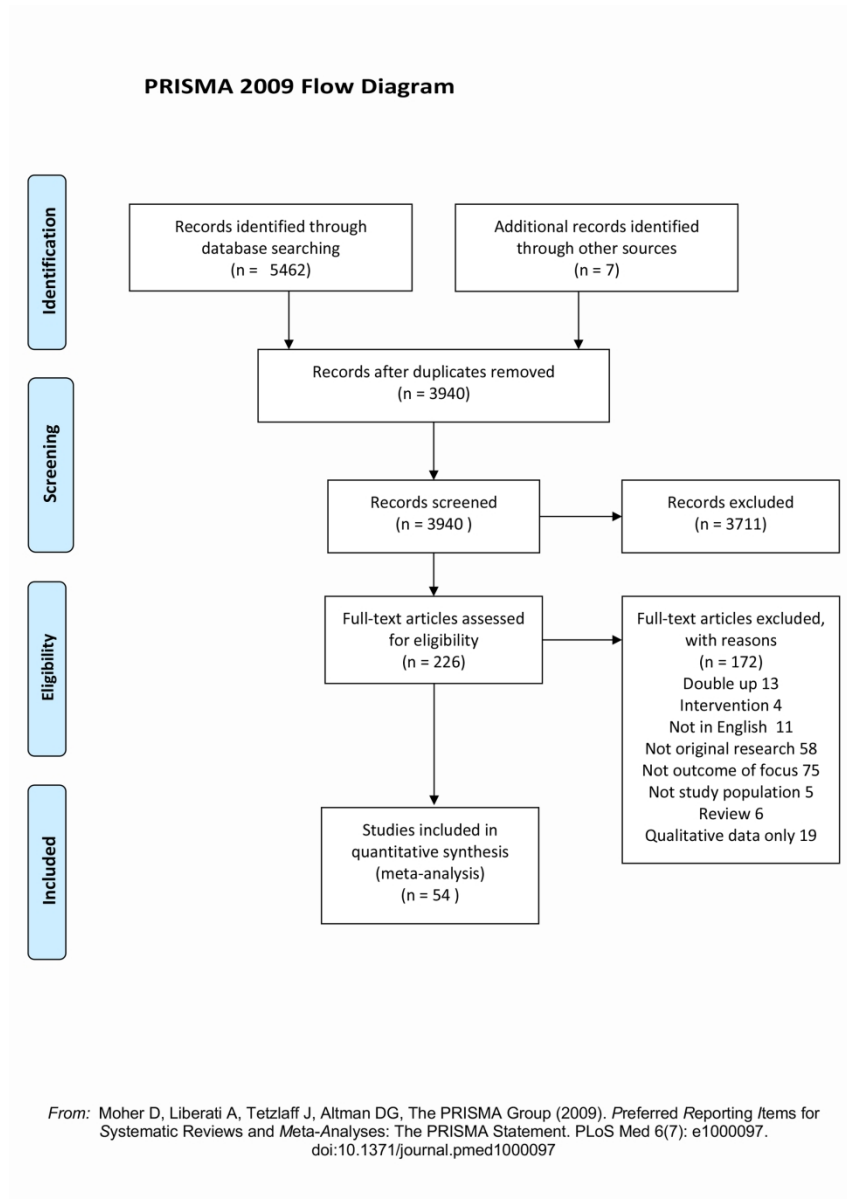

Figure 1: Prisma Flow Chart of included studies

1  
2  
3  
4  
5  
6  
7  
8  
9  
10  
11  
12  
13  
14  
15  
16  
17  
18  
19  
20  
21  
22  
23  
24  
25  
26  
27  
28  
29  
30  
31  
32  
33  
34  
35  
36  
37  
38  
39  
40  
41  
42  
43  
44  
45  
46  
47  
48  
49  
50  
51  
52  
53  
54  
55  
56  
57  
58  
59  
60

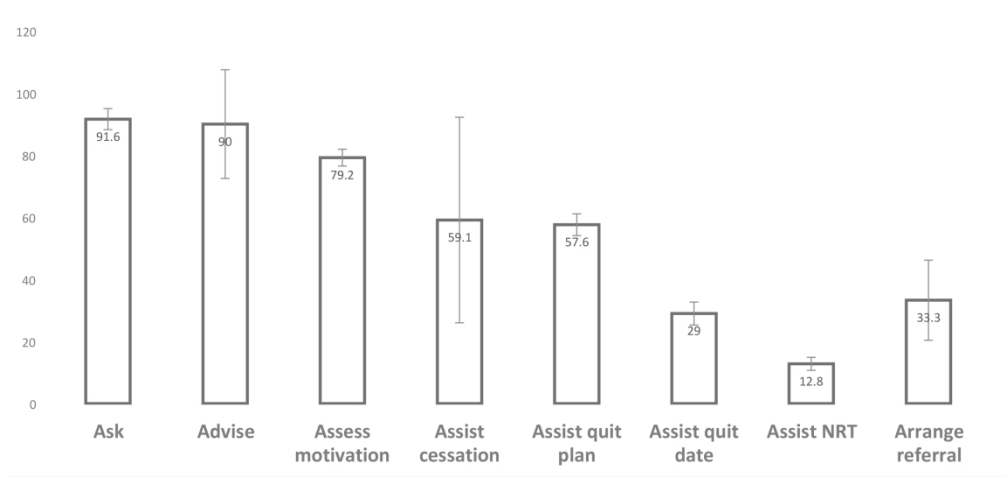

Figure 2: Comparison of pooled percentatges of selected categories of 'often/always'

Supplementary Table 1: Key search terms for systematic review on Health Providers' Practices for Smoking Cessation Care in Pregnancy

| <b>Health Professional</b> | <b>Attitudes and Practices</b>        | <b>Smoking</b>               | <b>Pregnancy</b>   |
|----------------------------|---------------------------------------|------------------------------|--------------------|
| Allied health personnel    | Health Knowledge, Attitudes, Practice | Tobacco dependence treatment | Maternal behaviour |
| General practitioner       | Attitude of Health Personnel          | Maternal tobacco smoking     | Perinatal Care     |
| Medical practitioner       | Knowledge                             | Smoking Cessation            | Pregnancy          |
| Health Professional        | Perception                            | Tobacco use disorder         | Maternal           |
| Health personnel           | Practice                              | Nicotine dependence          | Mother             |
| Family Practice            | Belief                                | Smoking treatment            | Preg*              |
| Specialist                 | Capacity                              | Smoking                      | Antenatal          |
| Physician                  | Capability                            | Smok*                        |                    |
| Doctor                     | Confidence                            | Tobacco                      |                    |
| Midwife                    | Priority                              |                              |                    |
| Gynaecology                | Barrier                               |                              |                    |
| Obstetrics                 | Attitude                              |                              |                    |
| Clinician                  | Skill                                 |                              |                    |
| Dentist                    | Ability                               |                              |                    |
| Pharmacist                 |                                       |                              |                    |
| Consultant                 |                                       |                              |                    |

*Note:* all search terms were “exploded”, meaning the terms underneath these keywords were also searched for.

1  
2  
3  
4  
5  
6  
7  
8  
9  
10  
11  
12  
13  
14  
15  
16  
17  
18  
19  
20  
21  
22  
23  
24  
25  
26  
27  
28  
29  
30  
31  
32  
33  
34  
35  
36  
37  
38  
39  
40  
41  
42  
43  
44  
45  
46

Supplementary Table 2: Characteristics of included quantitative (N=54) studies

For peer review only

| First Author (year) Country | Study Focus                                      | Population & Risk Category (high/low) | Study Aim(s)                                                                                                                                                                                                                                                             | Ask | Advise | Assess | Assist | Arrange follow up | NRT | Summary of results                                                                                                                                                                                                                                                                                                                                                                                                                                                                                                                                                                                                                                                                      |
|-----------------------------|--------------------------------------------------|---------------------------------------|--------------------------------------------------------------------------------------------------------------------------------------------------------------------------------------------------------------------------------------------------------------------------|-----|--------|--------|--------|-------------------|-----|-----------------------------------------------------------------------------------------------------------------------------------------------------------------------------------------------------------------------------------------------------------------------------------------------------------------------------------------------------------------------------------------------------------------------------------------------------------------------------------------------------------------------------------------------------------------------------------------------------------------------------------------------------------------------------------------|
| Abatemarco (2007) USA       | Health Providers (Midwives)                      | Low risk                              | Determine how New Jersey's certified nurse-midwives (CNMs) provide tobacco screening and cessation counselling to pregnant smoking women.                                                                                                                                | X   | X      | X      | X      | X                 |     | Nearly all midwives routinely ask, advise, and assess; while fewer address quit dates, or discuss medication options (assist) and perform follow-up activities (arrange). Midwives identify a need for training.                                                                                                                                                                                                                                                                                                                                                                                                                                                                        |
| Amarin (2005) Jordan        | Health Providers (Obstetrician & Gynaecologists) | Low risk                              | Establish tobacco use amongst obstetricians/gynaecologists and assess awareness of the impact of smoking on health; routine practices with patients who smoke; opinions of factors contributing to tobacco use and their perceived barriers to counselling improvements. | X   | X      |        | X      |                   |     | A high proportion of obstetricians/gynaecologists are smokers. Most health professionals associated smoking with low birth weight and sudden infant death syndrome. Fewer associated smoking with infertility, ectopic pregnancy, placenta praevia, abruption placenta and cancer of the uterine cervix. Friends, stress, parents' attitude, genetic predisposition, income and education were implicated factors for smoking. Current smokers were more likely to permit smoking in their practices. Non-smokers were most inclined to record their patients' tobacco habits. Only 54.3% provided cessation counselling. Lack of time and inadequate training were perceived barriers. |
| Bakker (2005) Netherlands   | Pregnant Women                                   | Low risk                              | To identify relevant factors that hamper or promote the provision of effective smoking cessation advice and counselling.                                                                                                                                                 |     |        | NA*    |        |                   |     | In general, midwives were motivated to provide their clients with smoking cessation advice, however, were less comfortable guiding women through the cessation process.                                                                                                                                                                                                                                                                                                                                                                                                                                                                                                                 |
| Bar-Zeev (2017) Australia   | Health Providers (GPs & Obstetricians)           | Low risk                              | Examine: 1) Self-reported provision of SCC to pregnant women by GPs and Obstetricians in Australia; 2) Barriers and enablers to SCC and 3) Associations between                                                                                                          | X   | X      | X      | X      | X                 | X   | Almost all clinicians (98%) reported that addressing smoking during pregnancy is a high priority, and that they feel comfortable raising the issue with a pregnant woman (95%). TDF statements receiving the lowest agreement (agree & strongly agree) were having sufficient time (41%), sufficient resources (47.5%) and optimism of intervention effectiveness (35%). Dimension reduction revealed two factors: 1) 'Internal influences' including confidence in counselling, confidence in prescribing NRT, optimism, sufficient time and resources; 2) 'External influences' including high priority, benefit relationship,                                                        |





|    |                |                                                                                                          |          |                                                                                                                                                                                                                                                                                                  |   |   |   |   |   |   |                                                                                                                                                                                                                                                                                                                                                                                                                                                                                                                     |
|----|----------------|----------------------------------------------------------------------------------------------------------|----------|--------------------------------------------------------------------------------------------------------------------------------------------------------------------------------------------------------------------------------------------------------------------------------------------------|---|---|---|---|---|---|---------------------------------------------------------------------------------------------------------------------------------------------------------------------------------------------------------------------------------------------------------------------------------------------------------------------------------------------------------------------------------------------------------------------------------------------------------------------------------------------------------------------|
| 1  |                |                                                                                                          |          | pregnant women and new parents.                                                                                                                                                                                                                                                                  |   |   |   |   |   |   |                                                                                                                                                                                                                                                                                                                                                                                                                                                                                                                     |
| 2  |                |                                                                                                          |          |                                                                                                                                                                                                                                                                                                  |   |   |   |   |   |   |                                                                                                                                                                                                                                                                                                                                                                                                                                                                                                                     |
| 3  |                |                                                                                                          |          |                                                                                                                                                                                                                                                                                                  |   |   |   |   |   |   |                                                                                                                                                                                                                                                                                                                                                                                                                                                                                                                     |
| 4  |                |                                                                                                          |          |                                                                                                                                                                                                                                                                                                  |   |   |   |   |   |   |                                                                                                                                                                                                                                                                                                                                                                                                                                                                                                                     |
| 5  | Castrucci      | Pregnant Women                                                                                           | Low risk | Describe the range of risk reduction behaviours among women who continue to smoke after learning of their pregnancy, including reduce tobacco use, eventual cessation and sustained abstinence as well the patient-reported smoking cessation - promoting behaviours of prenatal care providers. |   |   | X | X |   |   | Smoking cessation was achieved by only a quarter of antenatal smokers, almost 90 percent reduced their cigarette consumption. Antenatal smokers reported that prenatal care providers asked about their smoking (90.6%) and advised about quitting (76.5%). However, only 27.9% were given referrals to smoking cessation programs.                                                                                                                                                                                 |
| 6  | (2006)         |                                                                                                          |          |                                                                                                                                                                                                                                                                                                  |   |   |   |   |   |   |                                                                                                                                                                                                                                                                                                                                                                                                                                                                                                                     |
| 7  | USA            |                                                                                                          |          |                                                                                                                                                                                                                                                                                                  |   |   |   |   |   |   |                                                                                                                                                                                                                                                                                                                                                                                                                                                                                                                     |
| 8  |                |                                                                                                          |          |                                                                                                                                                                                                                                                                                                  |   |   |   |   |   |   |                                                                                                                                                                                                                                                                                                                                                                                                                                                                                                                     |
| 9  |                |                                                                                                          |          |                                                                                                                                                                                                                                                                                                  |   |   |   |   |   |   |                                                                                                                                                                                                                                                                                                                                                                                                                                                                                                                     |
| 10 |                |                                                                                                          |          |                                                                                                                                                                                                                                                                                                  |   |   |   |   |   |   |                                                                                                                                                                                                                                                                                                                                                                                                                                                                                                                     |
| 11 |                |                                                                                                          |          |                                                                                                                                                                                                                                                                                                  |   |   |   |   |   |   |                                                                                                                                                                                                                                                                                                                                                                                                                                                                                                                     |
| 12 |                |                                                                                                          |          |                                                                                                                                                                                                                                                                                                  |   |   |   |   |   |   |                                                                                                                                                                                                                                                                                                                                                                                                                                                                                                                     |
| 13 |                |                                                                                                          |          |                                                                                                                                                                                                                                                                                                  |   |   |   |   |   |   |                                                                                                                                                                                                                                                                                                                                                                                                                                                                                                                     |
| 14 |                |                                                                                                          |          |                                                                                                                                                                                                                                                                                                  |   |   |   |   |   |   |                                                                                                                                                                                                                                                                                                                                                                                                                                                                                                                     |
| 15 | Chang          | Pregnant Women & Health Providers (Obstetrics-Gynaecology Resident, Nurse Midwife, & Nurse Practitioner) | Low risk | Examine patient-provider communication about substance use behaviours during obstetric visits.                                                                                                                                                                                                   | X | X | X | X | X |   | Provider responses to smoking disclosures included discussions of risks, encouragement to quit-cut down, affirmation of attempts to quit-cut down, and referral to smoking cessation programs. Providers should discuss behavioural change strategies and motivations with pregnant patients who use substances.                                                                                                                                                                                                    |
| 16 | (2008)         |                                                                                                          |          |                                                                                                                                                                                                                                                                                                  |   |   |   |   |   |   |                                                                                                                                                                                                                                                                                                                                                                                                                                                                                                                     |
| 17 | USA            |                                                                                                          |          |                                                                                                                                                                                                                                                                                                  |   |   |   |   |   |   |                                                                                                                                                                                                                                                                                                                                                                                                                                                                                                                     |
| 18 |                |                                                                                                          |          |                                                                                                                                                                                                                                                                                                  |   |   |   |   |   |   |                                                                                                                                                                                                                                                                                                                                                                                                                                                                                                                     |
| 19 |                |                                                                                                          |          |                                                                                                                                                                                                                                                                                                  |   |   |   |   |   |   |                                                                                                                                                                                                                                                                                                                                                                                                                                                                                                                     |
| 20 |                |                                                                                                          |          |                                                                                                                                                                                                                                                                                                  |   |   |   |   |   |   |                                                                                                                                                                                                                                                                                                                                                                                                                                                                                                                     |
| 21 |                |                                                                                                          |          |                                                                                                                                                                                                                                                                                                  |   |   |   |   |   |   |                                                                                                                                                                                                                                                                                                                                                                                                                                                                                                                     |
| 22 | Chang          | Health Providers (Nurse Midwife, Nurse Practitioner, Residents, Physician Assistant)                     | Low risk | Describe obstetric providers' adherence to the evidence-based clinical practice guideline for smoking cessation counselling, the 5 A's (Ask, Advice, Assess, Assist, and Arrange).                                                                                                               | X | X | X | X | X | X | Obstetric providers frequently asked about smoking (98%) however, used 3 or more of the 5 A's in only 21% (24) of visits. In no visits did providers use all 5 A's.                                                                                                                                                                                                                                                                                                                                                 |
| 23 | (2013)         |                                                                                                          |          |                                                                                                                                                                                                                                                                                                  |   |   |   |   |   |   |                                                                                                                                                                                                                                                                                                                                                                                                                                                                                                                     |
| 24 | USA            |                                                                                                          |          |                                                                                                                                                                                                                                                                                                  |   |   |   |   |   |   |                                                                                                                                                                                                                                                                                                                                                                                                                                                                                                                     |
| 25 |                |                                                                                                          |          |                                                                                                                                                                                                                                                                                                  |   |   |   |   |   |   |                                                                                                                                                                                                                                                                                                                                                                                                                                                                                                                     |
| 26 |                |                                                                                                          |          |                                                                                                                                                                                                                                                                                                  |   |   |   |   |   |   |                                                                                                                                                                                                                                                                                                                                                                                                                                                                                                                     |
| 27 |                |                                                                                                          |          |                                                                                                                                                                                                                                                                                                  |   |   |   |   |   |   |                                                                                                                                                                                                                                                                                                                                                                                                                                                                                                                     |
| 28 |                |                                                                                                          |          |                                                                                                                                                                                                                                                                                                  |   |   |   |   |   |   |                                                                                                                                                                                                                                                                                                                                                                                                                                                                                                                     |
| 29 | Clasper        | Health Providers (Hospital Midwives, Community Midwives, General Practitioners, Obstetricians)           | Low risk | To inform the development of future smoking cessation interventions in pregnancy by measuring current practice and the associated attitudes and beliefs of the main professionals responsible for the delivery of antenatal care.                                                                | X | X |   | X | X |   | Most professionals asked about the smoking status of pregnant women, record smoking status and explain the risks of smoking while pregnant. Fewer professionals gave pregnant smokers advice on how to stop or monitored at and reviewed smoking status throughout pregnancy. Most experienced difficulty and a lack of enjoyment while giving smoking cessation counselling. Over half (53%) perceived themselves to be insufficiently trained, whilst few (28%) thought that they possessed the necessary skills. |
| 30 | (1995)         |                                                                                                          |          |                                                                                                                                                                                                                                                                                                  |   |   |   |   |   |   |                                                                                                                                                                                                                                                                                                                                                                                                                                                                                                                     |
| 31 | UK             |                                                                                                          |          |                                                                                                                                                                                                                                                                                                  |   |   |   |   |   |   |                                                                                                                                                                                                                                                                                                                                                                                                                                                                                                                     |
| 32 |                |                                                                                                          |          |                                                                                                                                                                                                                                                                                                  |   |   |   |   |   |   |                                                                                                                                                                                                                                                                                                                                                                                                                                                                                                                     |
| 33 |                |                                                                                                          |          |                                                                                                                                                                                                                                                                                                  |   |   |   |   |   |   |                                                                                                                                                                                                                                                                                                                                                                                                                                                                                                                     |
| 34 |                |                                                                                                          |          |                                                                                                                                                                                                                                                                                                  |   |   |   |   |   |   |                                                                                                                                                                                                                                                                                                                                                                                                                                                                                                                     |
| 35 |                |                                                                                                          |          |                                                                                                                                                                                                                                                                                                  |   |   |   |   |   |   |                                                                                                                                                                                                                                                                                                                                                                                                                                                                                                                     |
| 36 | Coleman-Cowger | Health Providers (Obstetrician & Gynaecologists)                                                         | Low risk | To assess current ob-gyn practice patterns related to the management of and barriers to smoking                                                                                                                                                                                                  | X | X | X | X | X | X | Ob-gyns estimated that approximated that 32% of pregnant smokers quit during pregnancy, but 50% return to smoking postpartum. The primary barrier was time limitations. Compared with findings from a similar study conducted in 1998, physicians are less likely to adhere to the 5 As smoking cessation guideline at present.                                                                                                                                                                                     |
| 37 | (2014)         |                                                                                                          |          |                                                                                                                                                                                                                                                                                                  |   |   |   |   |   |   |                                                                                                                                                                                                                                                                                                                                                                                                                                                                                                                     |
| 38 | USA            |                                                                                                          |          |                                                                                                                                                                                                                                                                                                  |   |   |   |   |   |   |                                                                                                                                                                                                                                                                                                                                                                                                                                                                                                                     |
| 39 |                |                                                                                                          |          |                                                                                                                                                                                                                                                                                                  |   |   |   |   |   |   |                                                                                                                                                                                                                                                                                                                                                                                                                                                                                                                     |
| 40 |                |                                                                                                          |          |                                                                                                                                                                                                                                                                                                  |   |   |   |   |   |   |                                                                                                                                                                                                                                                                                                                                                                                                                                                                                                                     |
| 41 |                |                                                                                                          |          |                                                                                                                                                                                                                                                                                                  |   |   |   |   |   |   |                                                                                                                                                                                                                                                                                                                                                                                                                                                                                                                     |
| 42 |                |                                                                                                          |          |                                                                                                                                                                                                                                                                                                  |   |   |   |   |   |   |                                                                                                                                                                                                                                                                                                                                                                                                                                                                                                                     |
| 43 |                |                                                                                                          |          |                                                                                                                                                                                                                                                                                                  |   |   |   |   |   |   |                                                                                                                                                                                                                                                                                                                                                                                                                                                                                                                     |
| 44 |                |                                                                                                          |          |                                                                                                                                                                                                                                                                                                  |   |   |   |   |   |   |                                                                                                                                                                                                                                                                                                                                                                                                                                                                                                                     |
| 45 |                |                                                                                                          |          |                                                                                                                                                                                                                                                                                                  |   |   |   |   |   |   |                                                                                                                                                                                                                                                                                                                                                                                                                                                                                                                     |
| 46 |                |                                                                                                          |          |                                                                                                                                                                                                                                                                                                  |   |   |   |   |   |   |                                                                                                                                                                                                                                                                                                                                                                                                                                                                                                                     |

1  
2  
3  
4  
5  
6  
7  
8  
9  
10  
11  
12  
13  
14  
15  
16  
17  
18  
19  
20  
21  
22  
23  
24  
25  
26  
27  
28  
29  
30  
31  
32  
33  
34  
35  
36  
37  
38  
39  
40  
41  
42  
43  
44  
45  
46

cessation during pregnancy and postpartum.

|                        |                                                                                       |          |                                                                                                                                                                                                                                             |   |   |   |     |                                                                                                                                                                                                                                                                                                                                                                                                                                                                                                                                                                                                                                                                                                                                                                                                                                                        |
|------------------------|---------------------------------------------------------------------------------------|----------|---------------------------------------------------------------------------------------------------------------------------------------------------------------------------------------------------------------------------------------------|---|---|---|-----|--------------------------------------------------------------------------------------------------------------------------------------------------------------------------------------------------------------------------------------------------------------------------------------------------------------------------------------------------------------------------------------------------------------------------------------------------------------------------------------------------------------------------------------------------------------------------------------------------------------------------------------------------------------------------------------------------------------------------------------------------------------------------------------------------------------------------------------------------------|
| Condliffe (2005) USA   | Health Providers (Midwives, Grandes E-H, Health Care Assistants)                      | Low risk | Explore the self-reported smoking-cessation interventions of maternity staff with pregnant smokers and their attitudes towards smoking in pregnancy.                                                                                        | X | X |   | X   | Over two-thirds of respondents (71%) reported not advising any pregnant women to give up smoking within the previous 7 days. However, 64% felt women should not make up their own minds about whether to smoke during pregnancy, and 81% agreed/strongly agreed that many pregnant women would like to give up smoking but need help and advice on how to succeed. Helping a pregnant woman to give up smoking was seen as being one of the most important things a midwife can do by 73% of the respondents. Although the reported attitudes were supportive of the midwife's role in smoking cessation, they did not translate into practice. The level of smoking cessation interventions was low.                                                                                                                                                  |
| Cooke (1996) Australia | Health Providers (Midwives)                                                           | Low risk | Assess current practice in smoking cessation interventions by midwives and to examine the relationship between the use of smoking interventions, practitioner's characteristics, and organisational factors.                                | X | X |   | X X | Most midwives used minimal interventions (advice and education) for at least some of their clients. The more skilled and more time-intensive forms of intervention (e.g., counselling, negotiating a quit date, and follow-up) were infrequently utilized. Participants estimated that half their smoking clients were not offered advice about smoking. Organizational factors such as: hospital policy for smoking intervention, type of hospital, size of hospital, cohesion of staff and work pressure predicted the use of smoking interventions. Self-reported ability to intervene for smoking and the level of assessment undertaken were practitioner characteristics which predicted the use of smoking interventions. The barriers that inhibit the use of smoking intervention by midwives are discussed and methods for change canvassed. |
| Cooke (1998) Australia | Health Providers (Midwives, Doctors: Obstetric Specialists, Registrars and Residents) | Low risk | The aims of the study were to describe the smoking intervention practice of antenatal clinic staff, and to ascertain the organizational and practitioner variables which predict clinician use of smoking interventions.                    | X | X |   | X X | Most antenatal clinic staff did not use the most effective forms of brief interventions for smoking. The presence of specific procedures and training in smoking cessation intervention appeared to be the most important predictors of reported smoking intervention in hospital antenatal clinics.                                                                                                                                                                                                                                                                                                                                                                                                                                                                                                                                                   |
| Eiser (1999) UK        | Health Providers (Midwives)                                                           | Low risk | Assess a) their attitudes to giving anti-smoking advice to pregnant smokers and whether they perceived this as part of their professional role and b) the types of advice they gave to pregnant smokers as part of their routine practices. | X | X | X | X   | Midwives attitudes towards giving anti-smoking advice were generally positive, and almost all reported routinely explaining the health dangers of smoking to pregnant smokers. Among midwives who had never smoked, those who held role attitudes that were more favourable towards anti-smoking intervention reported providing relatively more advice based on warnings of health consequences and an emphasis on abstinence. Among the remainder of the sample, more favourable attitudes predicted greater use of behaviourally-oriented advice to facilitate cessation or smoking reduction, but were unrelated to the use of health warnings and emphasis on abstinence.                                                                                                                                                                         |
| England (2014) USA     | Health Providers (Obstetrician-Gynaecologist Physicians)                              | Low risk | Examine screening practices and attitudes of obstetricians-gynaecologists toward new and emerging tobacco products.                                                                                                                         |   |   |   | NA* | A substantial proportion of obstetrician-gynaecologists reported never or inconsistently screening their pregnant patients for the use of non-combustible tobacco products. Responses regarding the harms of these products relative to cigarettes were mixed and most respondents wanted more information.                                                                                                                                                                                                                                                                                                                                                                                                                                                                                                                                            |

|    |          |                   |          |                                                                                                                         |   |   |   |   |   |   |                                                                                              |
|----|----------|-------------------|----------|-------------------------------------------------------------------------------------------------------------------------|---|---|---|---|---|---|----------------------------------------------------------------------------------------------|
| 1  |          |                   |          |                                                                                                                         |   |   |   |   |   |   |                                                                                              |
| 2  |          |                   |          |                                                                                                                         |   |   |   |   |   |   |                                                                                              |
| 3  | Floyd    | Health Providers  | Low risk | Assess the knowledge,                                                                                                   | X | X |   | X | X | X | While screening of prenatal patients for tobacco use and other drug use was reported by      |
| 4  | (2001)   | (Obstetric-       |          | beliefs and practice                                                                                                    |   |   |   |   |   |   | survey respondents, providing or arranging for interventions for those screening positives   |
| 5  | USA      | Gynaecologists)   |          | behaviours of obstetricians/<br>gynaecologists concerning<br>their patients prenatal use<br>of tobacco and other drugs. |   |   |   |   |   |   | was less often reported.                                                                     |
| 6  |          |                   |          |                                                                                                                         |   |   |   |   |   |   |                                                                                              |
| 7  |          |                   |          |                                                                                                                         |   |   |   |   |   |   |                                                                                              |
| 8  | Glover   | Health Providers  | Low risk | To examine New Zealand                                                                                                  | X | X | X | X | X | X | GPs are in the ideal position to offer stop-smoking advice, because they usually confirm     |
| 9  | (2008)   | (GPs,             |          | general practitioners' GP                                                                                               |   |   |   |   |   |   | pregnancy. GPs are most likely to advocate stopping smoking completely; midwives are         |
| 10 | NZ       | Registered        |          | and midwives' smoking                                                                                                   |   |   |   |   |   |   | more likely to advocate cutting down with a view to quitting. Both GPs and midwives          |
| 11 |          | Midwives)         |          | cessation knowledge and                                                                                                 |   |   |   |   |   |   | would benefit from improved knowledge of the full range of nicotine replacement therapy      |
| 12 |          |                   |          | support offered to pregnant                                                                                             |   |   |   |   |   |   | (NRT).                                                                                       |
| 13 | Grange   | Pregnant          | Low risk | To describe the                                                                                                         | X | X | X | X |   |   | Healthcare professionals seems to offer only rudimentary care. Simple strategies to help     |
| 14 | (2006)   | Women             |          | management of tobacco                                                                                                   |   |   |   |   |   |   | women give up smoking are required. The partner is an important target, especially if he     |
| 15 | France   |                   |          | withdrawal in pregnant                                                                                                  |   |   |   |   |   |   | can be persuaded to give up at the same time.                                                |
| 16 | Grimley  | Health Providers  | Low risk | To determine the adherence                                                                                              | X | X | X | X | X | X | Interventions are needed to motivate, support, and guide OB-GYN physicians to assist         |
| 17 | (2001)   | (Obstetrician &   |          | to the clinical guidelines for                                                                                          |   |   |   |   |   |   | and follow-up with their pregnant patients who smoke.                                        |
| 18 | USA      | Gynaecologists)   |          | smoking cessation among<br>Ob-gyn physicians within<br>Alabama.                                                         |   |   |   |   |   |   |                                                                                              |
| 19 |          |                   |          |                                                                                                                         |   |   |   |   |   |   |                                                                                              |
| 20 | Hartmann | Health Providers  | Low risk | To measure the use of best                                                                                              | X | X | X | X | X | X | Best practice is well-established to promote prenatal smoking cessation yet implemented      |
| 21 | (2007)   | (Obstetricians,   |          | practice intervention                                                                                                   |   |   |   |   |   |   | by only one third of prenatal care providers in North Carolina. In this study, best practice |
| 22 | USA      | Midwives,         |          | including each of the 5 A's                                                                                             |   |   |   |   |   |   | was associated with resources, practice organization, and reimbursement. Augmented use       |
| 23 |          | Family            |          | and to assess the                                                                                                       |   |   |   |   |   |   | of available resources (e.g., toll-free hot-lines) and adequate reimbursement may promote    |
| 24 |          | Medicine          |          | relationship between best                                                                                               |   |   |   |   |   |   | best practice implementation.                                                                |
| 25 |          | Physicians,       |          | practice and current                                                                                                    |   |   |   |   |   |   |                                                                                              |
| 26 |          | Nurse             |          | intervention resources,                                                                                                 |   |   |   |   |   |   |                                                                                              |
| 27 |          | Practitioners and |          | prior training in smoking                                                                                               |   |   |   |   |   |   |                                                                                              |
| 28 |          | Physician         |          | cessation intervention and                                                                                              |   |   |   |   |   |   |                                                                                              |
| 29 |          | Assistants)       |          | barriers to providing                                                                                                   |   |   |   |   |   |   |                                                                                              |
| 30 | Helwig   | Health Providers  | Low risk | intervention.                                                                                                           | X |   |   | X | X | X | Maternity care providers underutilize effective methods of smoking cessation for their       |
| 31 | (1998)   | (Obstetricians,   |          | Investigate the usual                                                                                                   |   |   |   |   |   |   | patients who smoke and rely on less effective methods.                                       |
| 32 | USA      | Family            |          | intervention practices of                                                                                               |   |   |   |   |   |   |                                                                                              |
| 33 |          | Physicians,       |          | family physicians,                                                                                                      |   |   |   |   |   |   |                                                                                              |
| 34 |          | Midwives)         |          | obstetricians, and nurse                                                                                                |   |   |   |   |   |   |                                                                                              |
| 35 |          |                   |          | midwives for their patients<br>who smoke.                                                                               |   |   |   |   |   |   |                                                                                              |
| 36 | Herbert  | Health Providers  | Low risk | Determine a). General                                                                                                   |   | X |   |   | X | X | Most general practitioners (62%) believed NRT to be effective in pregnancy and safer         |
| 37 | (2005)   | (GPs)             |          | practitioners' confidence in                                                                                            |   |   |   |   |   |   | than smoking (70%), but fewer (45%) believed NRT to be safe in pregnancy. GPs who            |
| 38 | UK       |                   |          | their ability to deliver a                                                                                              |   |   |   |   |   |   | believed NRT use in pregnancy was safer than smoking were most likely to recall having       |
| 39 |          |                   |          | range of smoking cessation                                                                                              |   |   |   |   |   |   | prescribed it. Many general practitioners were unsure about the safety of NRT in             |
| 40 |          |                   |          | interventions, including                                                                                                |   |   |   |   |   |   | pregnancy. The key factor influencing general practitioners' prescribing decisions was a     |
| 41 |          |                   |          | NRT in pregnancy, b). the                                                                                               |   |   |   |   |   |   | belief that NRT use in pregnancy was likely to be safer than smoking.                        |
| 42 |          |                   |          | frequency with which                                                                                                    |   |   |   |   |   |   |                                                                                              |
| 43 |          |                   |          | general practitioners recall                                                                                            |   |   |   |   |   |   |                                                                                              |
| 44 |          |                   |          | prescribing NRT in                                                                                                      |   |   |   |   |   |   |                                                                                              |
| 45 |          |                   |          |                                                                                                                         |   |   |   |   |   |   |                                                                                              |
| 46 |          |                   |          |                                                                                                                         |   |   |   |   |   |   |                                                                                              |

|    |                           |                                              |                                       |                                                                                                                                                                                                                                                                                                                                          |   |   |   |   |   |                                                                                                                                                                                                                                                                                                                                                                                                                                                                                                                                                                                                                                                                                                                                                                                                                                                                                                                    |
|----|---------------------------|----------------------------------------------|---------------------------------------|------------------------------------------------------------------------------------------------------------------------------------------------------------------------------------------------------------------------------------------------------------------------------------------------------------------------------------------|---|---|---|---|---|--------------------------------------------------------------------------------------------------------------------------------------------------------------------------------------------------------------------------------------------------------------------------------------------------------------------------------------------------------------------------------------------------------------------------------------------------------------------------------------------------------------------------------------------------------------------------------------------------------------------------------------------------------------------------------------------------------------------------------------------------------------------------------------------------------------------------------------------------------------------------------------------------------------------|
| 1  |                           |                                              |                                       | pregnancy and c). The factors that influence general practitioners to prescribe NRT in pregnancy.                                                                                                                                                                                                                                        |   |   |   |   |   |                                                                                                                                                                                                                                                                                                                                                                                                                                                                                                                                                                                                                                                                                                                                                                                                                                                                                                                    |
| 2  |                           |                                              |                                       |                                                                                                                                                                                                                                                                                                                                          |   |   |   |   |   |                                                                                                                                                                                                                                                                                                                                                                                                                                                                                                                                                                                                                                                                                                                                                                                                                                                                                                                    |
| 3  |                           |                                              |                                       |                                                                                                                                                                                                                                                                                                                                          |   |   |   |   |   |                                                                                                                                                                                                                                                                                                                                                                                                                                                                                                                                                                                                                                                                                                                                                                                                                                                                                                                    |
| 4  |                           |                                              |                                       |                                                                                                                                                                                                                                                                                                                                          |   |   |   |   |   |                                                                                                                                                                                                                                                                                                                                                                                                                                                                                                                                                                                                                                                                                                                                                                                                                                                                                                                    |
| 5  |                           |                                              |                                       |                                                                                                                                                                                                                                                                                                                                          |   |   |   |   |   |                                                                                                                                                                                                                                                                                                                                                                                                                                                                                                                                                                                                                                                                                                                                                                                                                                                                                                                    |
| 6  |                           |                                              |                                       |                                                                                                                                                                                                                                                                                                                                          |   |   |   |   |   |                                                                                                                                                                                                                                                                                                                                                                                                                                                                                                                                                                                                                                                                                                                                                                                                                                                                                                                    |
| 7  |                           |                                              |                                       |                                                                                                                                                                                                                                                                                                                                          |   |   |   |   |   |                                                                                                                                                                                                                                                                                                                                                                                                                                                                                                                                                                                                                                                                                                                                                                                                                                                                                                                    |
| 8  | Hickner (1990) USA        | Health Providers (Family Physicians)         | Low risk                              | Reports practitioner's attitudes and strategies towards antismoking interventions for pregnant smokers.                                                                                                                                                                                                                                  | X | X | X | X | X | Most physicians routinely assessed smoking status at the first prenatal visit, and advised pregnant smokers to quit smoking during pregnancy. The most frequently used method of intervention was personal counselling (97%), referral to smoking cessation clinics (40%), and behaviour modification (20%). Fifty-seven percent of physicians reported using antismoking pamphlets, and 30% used antismoking posters. 97% were convinced that the benefits of smoking cessation during pregnancy merited their efforts.                                                                                                                                                                                                                                                                                                                                                                                           |
| 9  |                           |                                              |                                       |                                                                                                                                                                                                                                                                                                                                          |   |   |   |   |   |                                                                                                                                                                                                                                                                                                                                                                                                                                                                                                                                                                                                                                                                                                                                                                                                                                                                                                                    |
| 10 |                           |                                              |                                       |                                                                                                                                                                                                                                                                                                                                          |   |   |   |   |   |                                                                                                                                                                                                                                                                                                                                                                                                                                                                                                                                                                                                                                                                                                                                                                                                                                                                                                                    |
| 11 |                           |                                              |                                       |                                                                                                                                                                                                                                                                                                                                          |   |   |   |   |   |                                                                                                                                                                                                                                                                                                                                                                                                                                                                                                                                                                                                                                                                                                                                                                                                                                                                                                                    |
| 12 |                           |                                              |                                       |                                                                                                                                                                                                                                                                                                                                          |   |   |   |   |   |                                                                                                                                                                                                                                                                                                                                                                                                                                                                                                                                                                                                                                                                                                                                                                                                                                                                                                                    |
| 13 | Hoekzema (2014) Australia | Pregnant Women                               | Low risk                              | To characterise pregnant smokers and to understand their smoking behaviours and preferences for smoking cessation. The specific objectives were to study the smoking patterns, smoking cessation and treatment preferences of pregnant women and to investigate the scope for a smoking cessation program in the antenatal settings.     |   | X | X |   | X | There were 87 (69.6%) daily smokers and 38 (30.4%) occasional smokers. Smokers mainly had medium (54; 43.2%) or heavy nicotine dependence (45; 36%). Current smokers were younger, Australian born, not living with a partner, from a lower socio-economic background, multigravida and had a smoker in their household or among friends. Although pregnant smokers were aware of the possible complications of smoking, their motivation and confidence to quit (median) on a 10-point scale were 7 and 4, respectively. Most smokers preferred to stop smoking gradually (74; 71.2%). The preferred methods for quitting were medications (49; 47.6%) and hypnotherapy (35; 34.0%). Patches (28; 29.5%) were the preferred dosage form, and nicotine replacement therapy (25; 28.1%) was the preferred medication. Less than half reported that their health professionals discouraged smoking during pregnancy. |
| 14 |                           |                                              |                                       |                                                                                                                                                                                                                                                                                                                                          |   |   |   |   |   |                                                                                                                                                                                                                                                                                                                                                                                                                                                                                                                                                                                                                                                                                                                                                                                                                                                                                                                    |
| 15 |                           |                                              |                                       |                                                                                                                                                                                                                                                                                                                                          |   |   |   |   |   |                                                                                                                                                                                                                                                                                                                                                                                                                                                                                                                                                                                                                                                                                                                                                                                                                                                                                                                    |
| 16 |                           |                                              |                                       |                                                                                                                                                                                                                                                                                                                                          |   |   |   |   |   |                                                                                                                                                                                                                                                                                                                                                                                                                                                                                                                                                                                                                                                                                                                                                                                                                                                                                                                    |
| 17 |                           |                                              |                                       |                                                                                                                                                                                                                                                                                                                                          |   |   |   |   |   |                                                                                                                                                                                                                                                                                                                                                                                                                                                                                                                                                                                                                                                                                                                                                                                                                                                                                                                    |
| 18 |                           |                                              |                                       |                                                                                                                                                                                                                                                                                                                                          |   |   |   |   |   |                                                                                                                                                                                                                                                                                                                                                                                                                                                                                                                                                                                                                                                                                                                                                                                                                                                                                                                    |
| 19 |                           |                                              |                                       |                                                                                                                                                                                                                                                                                                                                          |   |   |   |   |   |                                                                                                                                                                                                                                                                                                                                                                                                                                                                                                                                                                                                                                                                                                                                                                                                                                                                                                                    |
| 20 |                           |                                              |                                       |                                                                                                                                                                                                                                                                                                                                          |   |   |   |   |   |                                                                                                                                                                                                                                                                                                                                                                                                                                                                                                                                                                                                                                                                                                                                                                                                                                                                                                                    |
| 21 |                           |                                              |                                       |                                                                                                                                                                                                                                                                                                                                          |   |   |   |   |   |                                                                                                                                                                                                                                                                                                                                                                                                                                                                                                                                                                                                                                                                                                                                                                                                                                                                                                                    |
| 22 |                           |                                              |                                       |                                                                                                                                                                                                                                                                                                                                          |   |   |   |   |   |                                                                                                                                                                                                                                                                                                                                                                                                                                                                                                                                                                                                                                                                                                                                                                                                                                                                                                                    |
| 23 | Howard (2013) UK          | Pregnant Women                               | High risk – women with mental illness | Investigate whether pregnant women with mental disorders: a). Are less likely to accept referrals to smoking cessation services, b) are less likely to stop smoking by delivery, and c). Differ in their experiences of smoking, smoking cessation and smoking cessation services compared with pregnant women without mental disorders. |   |   | X | X |   | Pregnant women with mental disorders appear more motivated, yet find it more difficult, to stop smoking. Prioritisation of mental health over smoking may thus lead to increasing health inequality for this group.                                                                                                                                                                                                                                                                                                                                                                                                                                                                                                                                                                                                                                                                                                |
| 24 |                           |                                              |                                       |                                                                                                                                                                                                                                                                                                                                          |   |   |   |   |   |                                                                                                                                                                                                                                                                                                                                                                                                                                                                                                                                                                                                                                                                                                                                                                                                                                                                                                                    |
| 25 |                           |                                              |                                       |                                                                                                                                                                                                                                                                                                                                          |   |   |   |   |   |                                                                                                                                                                                                                                                                                                                                                                                                                                                                                                                                                                                                                                                                                                                                                                                                                                                                                                                    |
| 26 |                           |                                              |                                       |                                                                                                                                                                                                                                                                                                                                          |   |   |   |   |   |                                                                                                                                                                                                                                                                                                                                                                                                                                                                                                                                                                                                                                                                                                                                                                                                                                                                                                                    |
| 27 |                           |                                              |                                       |                                                                                                                                                                                                                                                                                                                                          |   |   |   |   |   |                                                                                                                                                                                                                                                                                                                                                                                                                                                                                                                                                                                                                                                                                                                                                                                                                                                                                                                    |
| 28 |                           |                                              |                                       |                                                                                                                                                                                                                                                                                                                                          |   |   |   |   |   |                                                                                                                                                                                                                                                                                                                                                                                                                                                                                                                                                                                                                                                                                                                                                                                                                                                                                                                    |
| 29 |                           |                                              |                                       |                                                                                                                                                                                                                                                                                                                                          |   |   |   |   |   |                                                                                                                                                                                                                                                                                                                                                                                                                                                                                                                                                                                                                                                                                                                                                                                                                                                                                                                    |
| 30 |                           |                                              |                                       |                                                                                                                                                                                                                                                                                                                                          |   |   |   |   |   |                                                                                                                                                                                                                                                                                                                                                                                                                                                                                                                                                                                                                                                                                                                                                                                                                                                                                                                    |
| 31 |                           |                                              |                                       |                                                                                                                                                                                                                                                                                                                                          |   |   |   |   |   |                                                                                                                                                                                                                                                                                                                                                                                                                                                                                                                                                                                                                                                                                                                                                                                                                                                                                                                    |
| 32 |                           |                                              |                                       |                                                                                                                                                                                                                                                                                                                                          |   |   |   |   |   |                                                                                                                                                                                                                                                                                                                                                                                                                                                                                                                                                                                                                                                                                                                                                                                                                                                                                                                    |
| 33 |                           |                                              |                                       |                                                                                                                                                                                                                                                                                                                                          |   |   |   |   |   |                                                                                                                                                                                                                                                                                                                                                                                                                                                                                                                                                                                                                                                                                                                                                                                                                                                                                                                    |
| 34 |                           |                                              |                                       |                                                                                                                                                                                                                                                                                                                                          |   |   |   |   |   |                                                                                                                                                                                                                                                                                                                                                                                                                                                                                                                                                                                                                                                                                                                                                                                                                                                                                                                    |
| 35 | Jones (2003) UK           | Pregnant Women & Health Providers (Midwives) | Low risk                              | Explore the attitudes of midwives and pregnant women towards smoking cessation advice to understand why it is not a routine part of antenatal care.                                                                                                                                                                                      |   | X |   | X |   | Only 45% of midwives offered smoking cessation advice routinely, although 82% felt it should be a part of the antenatal care (82%). Lack of time (66%) and training (54%) were the major reasons for this. Smoking cessation advice was not a priority for discussion among the midwives compared to topics such as antenatal screening or place of delivery. Women were aware of the dangers of smoking in pregnancy, but those who wanted to quit need more support from their midwives (83%). They ranked smoking cessation as a                                                                                                                                                                                                                                                                                                                                                                                |
| 36 |                           |                                              |                                       |                                                                                                                                                                                                                                                                                                                                          |   |   |   |   |   |                                                                                                                                                                                                                                                                                                                                                                                                                                                                                                                                                                                                                                                                                                                                                                                                                                                                                                                    |
| 37 |                           |                                              |                                       |                                                                                                                                                                                                                                                                                                                                          |   |   |   |   |   |                                                                                                                                                                                                                                                                                                                                                                                                                                                                                                                                                                                                                                                                                                                                                                                                                                                                                                                    |
| 38 |                           |                                              |                                       |                                                                                                                                                                                                                                                                                                                                          |   |   |   |   |   |                                                                                                                                                                                                                                                                                                                                                                                                                                                                                                                                                                                                                                                                                                                                                                                                                                                                                                                    |
| 39 |                           |                                              |                                       |                                                                                                                                                                                                                                                                                                                                          |   |   |   |   |   |                                                                                                                                                                                                                                                                                                                                                                                                                                                                                                                                                                                                                                                                                                                                                                                                                                                                                                                    |
| 40 |                           |                                              |                                       |                                                                                                                                                                                                                                                                                                                                          |   |   |   |   |   |                                                                                                                                                                                                                                                                                                                                                                                                                                                                                                                                                                                                                                                                                                                                                                                                                                                                                                                    |
| 41 |                           |                                              |                                       |                                                                                                                                                                                                                                                                                                                                          |   |   |   |   |   |                                                                                                                                                                                                                                                                                                                                                                                                                                                                                                                                                                                                                                                                                                                                                                                                                                                                                                                    |
| 42 |                           |                                              |                                       |                                                                                                                                                                                                                                                                                                                                          |   |   |   |   |   |                                                                                                                                                                                                                                                                                                                                                                                                                                                                                                                                                                                                                                                                                                                                                                                                                                                                                                                    |
| 43 |                           |                                              |                                       |                                                                                                                                                                                                                                                                                                                                          |   |   |   |   |   |                                                                                                                                                                                                                                                                                                                                                                                                                                                                                                                                                                                                                                                                                                                                                                                                                                                                                                                    |
| 44 |                           |                                              |                                       |                                                                                                                                                                                                                                                                                                                                          |   |   |   |   |   |                                                                                                                                                                                                                                                                                                                                                                                                                                                                                                                                                                                                                                                                                                                                                                                                                                                                                                                    |
| 45 |                           |                                              |                                       |                                                                                                                                                                                                                                                                                                                                          |   |   |   |   |   |                                                                                                                                                                                                                                                                                                                                                                                                                                                                                                                                                                                                                                                                                                                                                                                                                                                                                                                    |
| 46 |                           |                                              |                                       |                                                                                                                                                                                                                                                                                                                                          |   |   |   |   |   |                                                                                                                                                                                                                                                                                                                                                                                                                                                                                                                                                                                                                                                                                                                                                                                                                                                                                                                    |

1  
2  
3  
4  
5  
6  
7  
8  
9  
10  
11  
12  
13  
14  
15  
16  
17  
18  
19  
20  
21  
22  
23  
24  
25  
26  
27  
28  
29  
30  
31  
32  
33  
34  
35  
36  
37  
38  
39  
40  
41  
42  
43  
44  
45  
46

high priority for discussion at the antenatal visit. The midwives did not feel able to offer smoking cessation advice. The main reason being a of lack of time in the antenatal clinic.

|                                    |                                                               |          |                                                                                                                                                                                                                                               |   |   |   |   |   |   |                                                                                                                                                                                                                                                                                                                                                                                                                                                                                                                                                                                                                                                                                                                                                                                                             |
|------------------------------------|---------------------------------------------------------------|----------|-----------------------------------------------------------------------------------------------------------------------------------------------------------------------------------------------------------------------------------------------|---|---|---|---|---|---|-------------------------------------------------------------------------------------------------------------------------------------------------------------------------------------------------------------------------------------------------------------------------------------------------------------------------------------------------------------------------------------------------------------------------------------------------------------------------------------------------------------------------------------------------------------------------------------------------------------------------------------------------------------------------------------------------------------------------------------------------------------------------------------------------------------|
| Jordan (2006) USA                  | Health Providers (Obstetricians, Gynaecologist)               | Low risk | To assess Ohio obstetrician/gynaecologists' perceptions and use of the 5A's methods of smoking cessation with pregnant patients who smoking.                                                                                                  | X | X | X | X | X | X | Obstetrician/gynaecologists face many competing demands for their time and energy, yet 62% believed smoking cessation advice would be of significant value. Physicians with higher levels of efficacy expectations reported significantly greater use of the 5 As. Future research should explore ways to facilitate obstetrician/gynaecologists' use of the 5As method.                                                                                                                                                                                                                                                                                                                                                                                                                                    |
| Lemola (2012) Switzerland          | Health Providers (Gynaecologists, Midwives)                   | Low risk | Examined whether gynaecologists and midwives engage in screening and counselling of pregnant women and conducting interventions to prevent smoking during pregnancy. Examine control beliefs involving efficacy expectations of practitioner. | X | X |   |   | X |   | Most gynaecologists and midwives reported screening all pregnant patients regarding smoking, explaining the risks and recommending smoking cessation. By contrast, only a minority engages in more extensive prevention efforts. Strong control beliefs were predictive of a higher likelihood of screening and counselling, as well as of engaging in more extensive interventions.                                                                                                                                                                                                                                                                                                                                                                                                                        |
| Mabbutt (2002) Australia           | Pregnant Women                                                | Low risk | To examine substance use among pregnant women and their partners, to record changes in reported substance use during pregnancy and to determine what advice they received to stop smoking.                                                    |   | X |   |   |   |   | Routine advice to quit smoking was not the norm for this group who were motivated to attend antenatal classes and possibly more likely to act on quit smoking advice. Of the women and men who did receive advice to quit smoking, the majority of this advice was not from a health professional. Routine advice about quitting smoking should be a mandatory part of antenatal care, especially for disadvantaged groups, where smoking rates are higher. The antenatal setting accesses most pregnant women and provides a population base for comprehensive anti-smoking strategies for them and for their partners. Failure to implement such strategies would be to miss the opportunity for a cost-effective and disseminable public health intervention for pregnant women and their male partners. |
| McEwen (2003) UK                   | Health Providers (GPs)                                        | Low risk | Investigate methods of early referral of pregnant smokers.                                                                                                                                                                                    | X |   |   |   |   | X | From a total of 55 GPs, in 17 practices within a deprived area of South West London, according to predictions from the delivery figures for the previous year, approximately 120 pregnant smokers should be identified within the 9-month period that the study took place. GPs were invited to use whatever form of referral was most convenient to them. Only 8 referrals were received.                                                                                                                                                                                                                                                                                                                                                                                                                  |
| Mejia (2010) Argentina and Uruguay | HEALTH PROVIDERS (Obstetricians, Gynaecologists, & Residents) | Low risk | To describe physicians' practices of smoking cessation and second-hand smoke exposure counselling during prenatal visits.                                                                                                                     | X | X |   |   |   | X | Although 88.9% of practitioners always or almost always advised women to stop smoking, 75% believed it was acceptable for pregnant women to smoke up to 6 cigarettes per day. The risk of SHS exposure was 'always or almost always discussed' by only 34.5% of physicians. Multivariate logistic regression showed that lack of training was associated with less counselling about smoking cessation (OR 0.18; 95% CI 0.04-0.82) and SHS exposure (OR 0.27; 95% CI 0.12-0.59). Current compared to never smokers had lower odds of smoking cessation counselling (OR 0.39; 95% CI 0.05-0.82). Current smokers were less likely than former smokers to counsel about SHS (OR 0.25; 95% CI 0.11-0.62).                                                                                                      |
| Moran (2003) USA                   | Health Providers (Family Practitioner,                        | Low risk | To assess how frequently physicians identified the smoking status of pregnant                                                                                                                                                                 |   |   |   |   |   | X | Physicians identified pregnant women's smoking status at 81% of visits but provided smoking counselling at only 23% of visits by pregnant smokers. Physicians were less                                                                                                                                                                                                                                                                                                                                                                                                                                                                                                                                                                                                                                     |

|    |           |                  |            |                              |   |   |   |   |   |                                                                                              |
|----|-----------|------------------|------------|------------------------------|---|---|---|---|---|----------------------------------------------------------------------------------------------|
| 1  |           |                  |            |                              |   |   |   |   |   |                                                                                              |
| 2  |           |                  |            |                              |   |   |   |   |   |                                                                                              |
| 3  |           | General          |            | patients and how frequently  |   |   |   |   |   | likely to identify smoking status of non-White pregnant women but no less likely to          |
| 4  |           | Practitioner,    |            | physicians counselled        |   |   |   |   |   | counsel non-White smokers.                                                                   |
| 5  |           | Obstetrician, &  |            | pregnant smokers.            |   |   |   |   |   |                                                                                              |
| 6  |           | Gynaecologist)   |            |                              |   |   |   |   |   |                                                                                              |
| 7  | Mullen    | Health Providers | Low risk   | To describe Texas            | X |   | X | X | X | Obstetricians who are not reached by expert reports and guidelines from groups outside       |
| 8  | (1998)    | (Obstetricians)  |            | obstetricians' pregnancy     |   |   |   |   |   | their specialty or who do not perceive the seriousness of maternal smoking are less likely   |
| 9  | USA       |                  |            | smoking cessation            |   |   |   |   |   | to counsel consistently and to use the most effective techniques.                            |
| 10 |           |                  |            | counselling activity and to  |   |   |   |   |   |                                                                                              |
| 11 |           |                  |            | identify attributes          |   |   |   |   |   |                                                                                              |
| 12 |           |                  |            | associated with consistent,  |   |   |   |   |   |                                                                                              |
| 13 | Murphy    | Health Providers | Low risk   | to assess the knowledge,     | X | X |   |   |   | This study identified several constraints to midwives fulfilling this role, which affected   |
| 14 | (2016)    | (Midwives)       |            | attitudes, beliefs and       |   |   |   |   |   | their perceived behavioural control. These included stressful working conditions, too little |
| 15 | South     |                  |            | current practices of South   |   |   |   |   |   | time, a dearth of educational resources and a lack of knowledge of best practice             |
| 16 | Africa    |                  |            | Africa midwives in relation  |   |   |   |   |   | intervention methods and counselling skills. Perceived patient resistance to quitting was a  |
| 17 |           |                  |            | to providing smoking         |   |   |   |   |   | further obstacle.                                                                            |
| 18 |           |                  |            | cessation education or       |   |   |   |   |   |                                                                                              |
| 19 |           |                  |            | counselling to pregnant      |   |   |   |   |   |                                                                                              |
| 20 | Oncken    | Health Providers | Low risk   | To assess smoking            |   | X |   |   | X | We found that nicotine replacement therapies are commonly prescribed or recommended          |
| 21 | (2000)    | (Obstetrics &    |            | cessation counselling and    |   |   |   |   |   | to pregnant smokers by obstetric providers, but less commonly to lactating women by          |
| 22 | USA       | Paediatric)      |            | nicotine replacement         |   |   |   |   |   | paediatric providers.                                                                        |
| 23 |           |                  |            | therapy prescription and     |   |   |   |   |   |                                                                                              |
| 24 |           |                  |            | recommendation practices     |   |   |   |   |   |                                                                                              |
| 25 |           |                  |            | among obstetric and          |   |   |   |   |   |                                                                                              |
| 26 | Owen      | Pregnant         | Low risk   | paediatric providers.        |   |   |   |   |   |                                                                                              |
| 27 | (1999)    | Women            |            | Examines pregnant            |   | X |   |   |   | Less than 50% of pregnant smokers reported having received advice on smoking from a          |
| 28 | UK        |                  |            | women's reports of quality   |   |   |   |   |   | health professional during their current pregnancy: little change since the question was     |
| 29 |           |                  |            | and quantity of health       |   |   |   |   |   | first asked in 1994. Advice, when given, appeared to have had little impact on smoking       |
| 30 |           |                  |            | professional interventions   |   |   |   |   |   | cessation, and did not follow best available evidence, namely to quit rather than cut down.  |
| 31 |           |                  |            | from 1992 – 1999.            |   |   |   |   |   |                                                                                              |
| 32 | Passey    | Health Providers | High       | Aims to explore the          | X |   |   |   | X | Most respondents considered assessment of smoking status to be integral to antenatal care    |
| 33 | (2012)    | (AHW,            | Risk-      | knowledge and attitudes of   |   |   |   |   |   | and a professional responsibility. Most (79%) indicated that they assess smoking status in   |
| 34 | Australia | Midwives or      | women      | health care providers caring |   |   |   |   |   | 100% of clients. Knowledge of risks was generally good, but knowledge of cessation was       |
| 35 |           | Nurses,          | Aboriginal | for pregnant Australian      |   |   |   |   |   | poor.                                                                                        |
| 36 |           | Doctors)         | and Torres | Aboriginal women             |   |   |   |   |   | Factors independently associated with assessing smoking status among all women were:         |
| 37 |           |                  | Strait     | regarding smoking risk and   |   |   |   |   |   | employer service type (p = 0.025); cessation knowledge score (p = 0.011); and                |
| 38 |           |                  | Islander   | cessation and identify       |   |   |   |   |   | disagreeing with the statement that giving advice is not worth it given the low level of     |
| 39 |           |                  |            | factors associate with self- |   |   |   |   |   | success (p = 0.011).                                                                         |
| 40 |           |                  |            | reported assessment of       |   |   |   |   |   |                                                                                              |
| 41 |           |                  |            | smoking. Optimal and         |   |   |   |   |   |                                                                                              |
| 42 |           |                  |            | assessment of smoking        |   |   |   |   |   |                                                                                              |
| 43 |           |                  |            | status.                      |   |   |   |   |   |                                                                                              |

|    |                |                                                            |                                       |                                                                                                                                                   |   |   |   |   |   |     |                                                                                                                                                                                                                                                                                                                                                                                                                                                                                                                                                                                                                                                                                                                                      |
|----|----------------|------------------------------------------------------------|---------------------------------------|---------------------------------------------------------------------------------------------------------------------------------------------------|---|---|---|---|---|-----|--------------------------------------------------------------------------------------------------------------------------------------------------------------------------------------------------------------------------------------------------------------------------------------------------------------------------------------------------------------------------------------------------------------------------------------------------------------------------------------------------------------------------------------------------------------------------------------------------------------------------------------------------------------------------------------------------------------------------------------|
| 1  |                |                                                            |                                       |                                                                                                                                                   |   |   |   |   |   |     |                                                                                                                                                                                                                                                                                                                                                                                                                                                                                                                                                                                                                                                                                                                                      |
| 2  |                |                                                            |                                       |                                                                                                                                                   |   |   |   |   |   |     |                                                                                                                                                                                                                                                                                                                                                                                                                                                                                                                                                                                                                                                                                                                                      |
| 3  | Passey (2015)  | Pregnant Women                                             | High Risk-women                       | Provision of antenatal smoking cessation support: A survey with pregnant Aboriginal and Torres Strait Islander women.                             | X | X |   | X |   |     | Despite most pregnant women who smoke reporting advice and support to quit, the persisting high prevalence of smoking suggests that this support is insufficient to overcome the many factors pushing women to smoke.                                                                                                                                                                                                                                                                                                                                                                                                                                                                                                                |
| 4  | Australia      |                                                            | Aboriginal and Torres Strait Islander |                                                                                                                                                   |   |   |   |   |   |     |                                                                                                                                                                                                                                                                                                                                                                                                                                                                                                                                                                                                                                                                                                                                      |
| 5  |                |                                                            |                                       |                                                                                                                                                   |   |   |   |   |   |     |                                                                                                                                                                                                                                                                                                                                                                                                                                                                                                                                                                                                                                                                                                                                      |
| 6  |                |                                                            |                                       |                                                                                                                                                   |   |   |   |   |   |     |                                                                                                                                                                                                                                                                                                                                                                                                                                                                                                                                                                                                                                                                                                                                      |
| 7  |                |                                                            |                                       |                                                                                                                                                   |   |   |   |   |   |     |                                                                                                                                                                                                                                                                                                                                                                                                                                                                                                                                                                                                                                                                                                                                      |
| 8  |                |                                                            |                                       |                                                                                                                                                   |   |   |   |   |   |     |                                                                                                                                                                                                                                                                                                                                                                                                                                                                                                                                                                                                                                                                                                                                      |
| 9  | Passey (2014)  | Health Providers (AHW, Midwives or Nurses, Doctors)        | High Risk-women                       | Supporting pregnant Aboriginal and Torres Strait Islander women to quit smoking: views of antenatal care providers and pregnant indigenous women. |   |   |   |   |   | NA* | Current smokers (n = 121) were less positive about the potential effectiveness of most of the 12 strategies than the providers (n = 127). For example, family support was considered helpful by 64 % of smokers and 91 % of providers; between 56 and 62 % of smokers considered advice and support from midwives, doctors or Aboriginal Health Workers likely to be helpful, compared to 85-90 % of providers. Rewards for quitting were considered helpful by 63 % of smokers and 56 % of providers, with smokers rating them more highly and providers rating them lower, than most other strategies. Quitline was least popular for both.                                                                                        |
| 10 | Australia      |                                                            | Aboriginal and Torres Strait Islander |                                                                                                                                                   |   |   |   |   |   |     |                                                                                                                                                                                                                                                                                                                                                                                                                                                                                                                                                                                                                                                                                                                                      |
| 11 |                |                                                            |                                       |                                                                                                                                                   |   |   |   |   |   |     |                                                                                                                                                                                                                                                                                                                                                                                                                                                                                                                                                                                                                                                                                                                                      |
| 12 |                |                                                            |                                       |                                                                                                                                                   |   |   |   |   |   |     |                                                                                                                                                                                                                                                                                                                                                                                                                                                                                                                                                                                                                                                                                                                                      |
| 13 |                |                                                            |                                       |                                                                                                                                                   |   |   |   |   |   |     |                                                                                                                                                                                                                                                                                                                                                                                                                                                                                                                                                                                                                                                                                                                                      |
| 14 |                |                                                            |                                       |                                                                                                                                                   |   |   |   |   |   |     |                                                                                                                                                                                                                                                                                                                                                                                                                                                                                                                                                                                                                                                                                                                                      |
| 15 | Price (2006)   | Health Providers (Nurse-Midwives)                          | Low risk                              | Perceptions and Use of Smoking Cessation in Nurse-Midwives' Practice.                                                                             | X | X | X | X | X | X   | Few nurse-midwives identified barriers to counselling pregnant patients who smoked, but the most common were lack of time (14%) and not knowing where to send pregnant smokers for treatment (14%). Most respondents believed that nicotine replacement therapy (NRT) would be most likely to reduce the number of pregnant smokers (74%), yet few (26%) were confident in their ability to prescribe/recommend nicotine replacement therapy. Respondents more likely to use 5 A's can be characterized as the following: had higher efficacy expectations in their ability to communicate issues about the 5 A's and had higher outcome expectations regarding the effects of using the 5 A's.                                      |
| 16 | USA            |                                                            |                                       |                                                                                                                                                   |   |   |   |   |   |     |                                                                                                                                                                                                                                                                                                                                                                                                                                                                                                                                                                                                                                                                                                                                      |
| 17 |                |                                                            |                                       |                                                                                                                                                   |   |   |   |   |   |     |                                                                                                                                                                                                                                                                                                                                                                                                                                                                                                                                                                                                                                                                                                                                      |
| 18 |                |                                                            |                                       |                                                                                                                                                   |   |   |   |   |   |     |                                                                                                                                                                                                                                                                                                                                                                                                                                                                                                                                                                                                                                                                                                                                      |
| 19 |                |                                                            |                                       |                                                                                                                                                   |   |   |   |   |   |     |                                                                                                                                                                                                                                                                                                                                                                                                                                                                                                                                                                                                                                                                                                                                      |
| 20 |                |                                                            |                                       |                                                                                                                                                   |   |   |   |   |   |     |                                                                                                                                                                                                                                                                                                                                                                                                                                                                                                                                                                                                                                                                                                                                      |
| 21 |                |                                                            |                                       |                                                                                                                                                   |   |   |   |   |   |     |                                                                                                                                                                                                                                                                                                                                                                                                                                                                                                                                                                                                                                                                                                                                      |
| 22 | Price (2006)   | Health Providers (Obstetricians, Gynaecologists)           | Low risk                              | Obstetricians and gynaecologists' perceptions and use of nicotine replacement therapy.                                                            | X | X | X | X | X | X   | The majority did not prescribe NRT possibly because few respondents received cigarette smoking cessation training in medical school or their residencies. Significant revisions in professional training and more continuing medical education are needed regarding smoking cessation and use of NRT.                                                                                                                                                                                                                                                                                                                                                                                                                                |
| 23 | USA            |                                                            |                                       |                                                                                                                                                   |   |   |   |   |   |     |                                                                                                                                                                                                                                                                                                                                                                                                                                                                                                                                                                                                                                                                                                                                      |
| 24 |                |                                                            |                                       |                                                                                                                                                   |   |   |   |   |   |     |                                                                                                                                                                                                                                                                                                                                                                                                                                                                                                                                                                                                                                                                                                                                      |
| 25 | Pullon (2004)  | Health Providers (GPs Practicing Obstetrics, Midwives)     | Low risk                              | Smoking cessation and nicotine replacement therapy in current primary maternity care.                                                             | X | X |   |   |   | X   | Only about half of the health professional gave smoking cessation advice to most pregnant women who smoked. They were uncertain about the safety of NRT use in pregnant and breastfeeding women. Most respondents requested more information about NRT use.                                                                                                                                                                                                                                                                                                                                                                                                                                                                          |
| 26 | NZ             |                                                            |                                       |                                                                                                                                                   |   |   |   |   |   |     |                                                                                                                                                                                                                                                                                                                                                                                                                                                                                                                                                                                                                                                                                                                                      |
| 27 |                |                                                            |                                       |                                                                                                                                                   |   |   |   |   |   |     |                                                                                                                                                                                                                                                                                                                                                                                                                                                                                                                                                                                                                                                                                                                                      |
| 28 |                |                                                            |                                       |                                                                                                                                                   |   |   |   |   |   |     |                                                                                                                                                                                                                                                                                                                                                                                                                                                                                                                                                                                                                                                                                                                                      |
| 29 | Roske (2009)   | Health Providers (Midwives, Gynaecologists, Paediatrician) | Low risk                              | Smoking cessation counselling for pregnant and postpartum women among midwives, gynaecologists and paediatricians in Germany.                     | X | X |   | X |   |     | Depending on profession, 90 % to 100 % see smoking cessation counselling as their assignment, 17 % to 80 % screen for, 48 % to 90 % document smoking status, and 55 % to 76 % offer brief or extensive counselling. 61 % to 87 % consider training to enhance their knowledge and/or counselling skills necessary. The compliance of providers with the necessity to give support in smoking cessation is very high. However, the status of cessation counselling does not sufficiently correspond to the evidence based requirements.                                                                                                                                                                                               |
| 30 | Germany        |                                                            |                                       |                                                                                                                                                   |   |   |   |   |   |     |                                                                                                                                                                                                                                                                                                                                                                                                                                                                                                                                                                                                                                                                                                                                      |
| 31 |                |                                                            |                                       |                                                                                                                                                   |   |   |   |   |   |     |                                                                                                                                                                                                                                                                                                                                                                                                                                                                                                                                                                                                                                                                                                                                      |
| 32 |                |                                                            |                                       |                                                                                                                                                   |   |   |   |   |   |     |                                                                                                                                                                                                                                                                                                                                                                                                                                                                                                                                                                                                                                                                                                                                      |
| 33 |                |                                                            |                                       |                                                                                                                                                   |   |   |   |   |   |     |                                                                                                                                                                                                                                                                                                                                                                                                                                                                                                                                                                                                                                                                                                                                      |
| 34 | Solberg (2010) | Pregnant Women                                             | Low risk                              | Disparities in tobacco cessation medication orders and fills among special populations.                                                           |   |   |   | X |   | X   | 32,733 current users of tobacco, 18,047 of whom had both health insurance and pharmacy claims data available. After adjustment, 15.4% overall had received an order for cessation medications during this year, but only 78% had filled it. Groups receiving fewer orders than their comparison groups were aged 18-34 years or older than 65 years, men, pregnant women, Asians and Hispanics, and those with non-English-language preference, on Medicaid, or with fewer visits. The same groups were less likely to fill that prescription, except patients with non-English preference or Medicaid. There are disparities in both the receipt of cessation medication orders and the likelihood of filling them for some special |
| 35 | USA            |                                                            |                                       |                                                                                                                                                   |   |   |   |   |   |     |                                                                                                                                                                                                                                                                                                                                                                                                                                                                                                                                                                                                                                                                                                                                      |
| 36 |                |                                                            |                                       |                                                                                                                                                   |   |   |   |   |   |     |                                                                                                                                                                                                                                                                                                                                                                                                                                                                                                                                                                                                                                                                                                                                      |
| 37 |                |                                                            |                                       |                                                                                                                                                   |   |   |   |   |   |     |                                                                                                                                                                                                                                                                                                                                                                                                                                                                                                                                                                                                                                                                                                                                      |
| 38 |                |                                                            |                                       |                                                                                                                                                   |   |   |   |   |   |     |                                                                                                                                                                                                                                                                                                                                                                                                                                                                                                                                                                                                                                                                                                                                      |
| 39 |                |                                                            |                                       |                                                                                                                                                   |   |   |   |   |   |     |                                                                                                                                                                                                                                                                                                                                                                                                                                                                                                                                                                                                                                                                                                                                      |
| 40 |                |                                                            |                                       |                                                                                                                                                   |   |   |   |   |   |     |                                                                                                                                                                                                                                                                                                                                                                                                                                                                                                                                                                                                                                                                                                                                      |
| 41 |                |                                                            |                                       |                                                                                                                                                   |   |   |   |   |   |     |                                                                                                                                                                                                                                                                                                                                                                                                                                                                                                                                                                                                                                                                                                                                      |
| 42 |                |                                                            |                                       |                                                                                                                                                   |   |   |   |   |   |     |                                                                                                                                                                                                                                                                                                                                                                                                                                                                                                                                                                                                                                                                                                                                      |
| 43 |                |                                                            |                                       |                                                                                                                                                   |   |   |   |   |   |     |                                                                                                                                                                                                                                                                                                                                                                                                                                                                                                                                                                                                                                                                                                                                      |
| 44 |                |                                                            |                                       |                                                                                                                                                   |   |   |   |   |   |     |                                                                                                                                                                                                                                                                                                                                                                                                                                                                                                                                                                                                                                                                                                                                      |
| 45 |                |                                                            |                                       |                                                                                                                                                   |   |   |   |   |   |     |                                                                                                                                                                                                                                                                                                                                                                                                                                                                                                                                                                                                                                                                                                                                      |
| 46 |                |                                                            |                                       |                                                                                                                                                   |   |   |   |   |   |     |                                                                                                                                                                                                                                                                                                                                                                                                                                                                                                                                                                                                                                                                                                                                      |



1  
2  
3  
4  
5  
6  
7  
8  
9  
10  
11  
12  
13  
14  
15  
16  
17  
18  
19  
20  
21  
22  
23  
24  
25  
26  
27  
28  
29  
30  
31  
32  
33  
34  
35  
36  
37  
38  
39  
40  
41  
42  
43  
44  
45  
46

populations. The causes are likely to be complex, but this information provides a starting point for learning to improve this problem.

|                           |                                                                                                 |                            |                                                                                                                                                                                                            |   |   |   |   |   |                                                                                                                                                                                                                                                                                                                                                                                                                                                                                                                                                                                                                                                                      |
|---------------------------|-------------------------------------------------------------------------------------------------|----------------------------|------------------------------------------------------------------------------------------------------------------------------------------------------------------------------------------------------------|---|---|---|---|---|----------------------------------------------------------------------------------------------------------------------------------------------------------------------------------------------------------------------------------------------------------------------------------------------------------------------------------------------------------------------------------------------------------------------------------------------------------------------------------------------------------------------------------------------------------------------------------------------------------------------------------------------------------------------|
| Tappin (2010) UK          | NA                                                                                              | Low risk                   | To establish a denominator for pregnant smokers in Scotland and describe the proportion who are referred to specialist services, engage in one-to-one counselling, set a quit date and quit 4 weeks later. | X |   |   | X |   | Poor smoking cessation outcomes are a product of current limitations to identification, referral, engagement and treatment. Carbon monoxide breath testing can bypass this difficulty of patient providing faulty information.                                                                                                                                                                                                                                                                                                                                                                                                                                       |
| Thyrian (2006) Germany    | Health Providers (Midwives)                                                                     | Low risk                   | To establish a denominator for pregnant smokers in Scotland and describe the proportion who are referred to specialist services, engage in one-to-one counselling, set a quit date and quit 4 weeks later. | X | X |   | X |   | Smoking and exposure to environmental tobacco smoke are seen as prominent health threats that midwives reported they addressed routinely, including giving advice to stop smoking.                                                                                                                                                                                                                                                                                                                                                                                                                                                                                   |
| Tong (2008) USA           | Pregnant Women                                                                                  | Low risk                   | Investigate the attitudes of midwives to counselling women about their smoking behaviour during pregnancy and post-partum.                                                                                 |   |   |   |   | X | Almost all women reported that their prenatal care provider asked if they smoked, but only 56.7% reported that a provider counselled them to quit smoking. Only 11.5% of women who smoked in late pregnancy used a cessation method, including self-help materials (6.3%); medications (3.9%); face-to-face counselling (1.7%); telephone-based counselling (1.5%); Internet-based counselling (1.3%); and a class or program (1.0%).                                                                                                                                                                                                                                |
| Tran (2010) USA           | Pregnant Women                                                                                  | Low risk                   | To explore racial/ethnic disparities in the receipt of optimal smoking cessation counselling during prenatal care.                                                                                         | X | X |   | X |   | Of 594 first trimester pregnant smokers, the majority were asked and advised about smoking by a prenatal care provider. However, a substantial proportion of women did not receive assistance to quit and only 42.2% received all three steps. Significant racial/ethnic variations were found only in the Assist step. Compared to non-Hispanic (NH) White women, NH American Indian women had lower odds of receiving all three steps. In contrast, NH Black women had increased odds of receiving all three steps. We conclude that there is a need for prenatal care providers to address tobacco use, especially to Assist quitting, with all pregnant smokers. |
| Tzelepis (2017) Australia | Health Providers (AHW or Aboriginal Health Education Officers, Child Health Nurses, & Midwives) | High Risk-women Aboriginal | To examine Aboriginal antenatal and postnatal staff confidence, perceived role and delivery of smoking cessation care to Aboriginal women and characteristics associated with provision of such care.      | X |   |   | X | X | Most staff reported they assessed clients' smoking status most or all of the time (92.2%). However, only a minority reported they offered a Quitline referral (42.2%), provided follow-up support (28.6%) or provided nicotine replacement therapy (4.7%) to most or all clients who smoked. Few staff felt confident in motivating clients to quit smoking (19.7%) and advising clients about using nicotine replacement therapy (15.6%). Staff confident with talking to clients about how smoking affected their health had significantly higher odds of offering a Quitline referral and quitting assistance to clients who smoke.                               |
| Walsh (1995) Australia    | Health Providers (Medical Directors & Nursing Directors)                                        | Low risk                   | To assess the smoking cessation practices of Australian public antenatal clinics.                                                                                                                          |   |   | X |   | X | Smoking advice was rated an essential activity at the first antenatal visit by 69% of responding directors. Nonetheless, only 12% of clinics indicated they offered relevant training and 4% reported written policies. Results also indicate senior staff may have suboptimal levels of awareness of smoking risks. Clinics used a narrow array of strategies                                                                                                                                                                                                                                                                                                       |



1  
2  
3  
4  
5  
6  
7  
8  
9  
10  
11  
12  
13  
14  
15  
16  
17  
18  
19  
20  
21  
22  
23  
24  
25  
26  
27  
28  
29  
30  
31  
32  
33  
34  
35  
36  
37  
38  
39  
40  
41  
42  
43  
44  
45  
46

to promote cessation. Almost one-third of directors said they advised smokers to cut down rather than stop smoking completely.

|                  |                                                                                                     |          |                                                                                                                                                                |   |   |   |   |   |   |                                                                                                                                                                                                                                                                                                                                                                                                                                                                                                                                                                                                            |
|------------------|-----------------------------------------------------------------------------------------------------|----------|----------------------------------------------------------------------------------------------------------------------------------------------------------------|---|---|---|---|---|---|------------------------------------------------------------------------------------------------------------------------------------------------------------------------------------------------------------------------------------------------------------------------------------------------------------------------------------------------------------------------------------------------------------------------------------------------------------------------------------------------------------------------------------------------------------------------------------------------------------|
| Zapka (2000) USA | Health Providers (Physician, Nurse-Practitioner or Midwife, RN, Nutritionists, Nutrition Assistant) | Low risk | Assess providers' performance of smoking cessation counselling steps with low-income pregnant and postpartum women receiving care at community health centres. | X | X | X | X | X | X | Providers in obstetric clinics had the highest scores and those in paediatric clinics had the lowest scores. Nurse practitioners and nutritionists had higher scores than other providers. Clinic type, greater smoking-related knowledge, older age, and perception of smoking cessation as a priority were independently related to better counselling performance. Low scores for performance of steps beyond assessment and advice indicate a need for emphasis on the assistance and follow-up steps of national guidelines. Providers' own commitment to helping mothers stop smoking was important. |
|------------------|-----------------------------------------------------------------------------------------------------|----------|----------------------------------------------------------------------------------------------------------------------------------------------------------------|---|---|---|---|---|---|------------------------------------------------------------------------------------------------------------------------------------------------------------------------------------------------------------------------------------------------------------------------------------------------------------------------------------------------------------------------------------------------------------------------------------------------------------------------------------------------------------------------------------------------------------------------------------------------------------|

NA – Not applicable to study or not described

### Supplementary Text 1: Grouping of outcome measures for the meta-analyses

For each outcome (Ask, Advice, Assess motivation to quit, Assess nicotine dependence, Assist, Arrange follow up, Arrange referral, NRT), we looked at the specific measurement that was done to decide whether it was feasible to group together. To achieve this we looked both at data collection method – cross-sectional survey/ audit of patients medical records/ audio-recording of consultation/ women’s report through survey or interview; and also on the measure itself that was used – Likert scale/ dichotomous YES/NO question and so forth.

ASK – overall 38 manuscripts had data on ASK. Out of these 12 used a survey measure reflecting asking all of their patients. We included in this analysis the proportion answering always if a Likert scale was used, or the proportion answering Yes if a dichotomous question was used either asking if you ask all of your patients? Or if you ask your patients always? Answers reflecting asking more than 75% of their patients were also considered as Yes for this analysis. 9 other manuscript used a survey measure reflecting asking usually and always – this including the combined answers in Likert scales (always and usually; and/or most of the time and all of the time). Two manuscripts provided data for both these measures (Bar-Zeev et al and Mejia et al). 4 other manuscripts used women’s report whether they recall been asked during their pregnancy.

Advice – The same principles as used in ASK (see above). Advice always included 6 manuscripts using either Likert scales or asking whether you always advise your patients to quit. Advice always and often included 9 manuscripts using either a scale of always and often; or always and usually; or advising all and most of women; or a Yes/No question whether you advice routinely (to more than 50% of patients). Since 8 manuscripts used a more general “Do you advise Yes/No” question, without referring to the amount of patients this is done with, these were grouped separately as Advice Yes/No. 4 other manuscripts used women’s report whether they recall been advised to quit during their pregnancy.

Assess motivation to quit – 10 manuscripts in total included some aspect of assessing motivation to quit. 1 used audio-recordings. 2 manuscripts used a measure calculating the mean on a different scale (1-5 and 1-3). 1 used women report. 1 reported on % always only. 1 reported on % usually always. 3 manuscripts assessed willingness to quit in general (with no time point included in the question) and reported on the proportion that answered “always and usually” – these were included in the meta-analysis. One paper asked a similar question but defined this as “% always usually assess whether the patient is willing to make a quit attempt within the next 30 days”. Since this included a specific time-point it was considered to be different to the other 3 and not included.

Assess nicotine dependence – Only 3 papers included a question on this topic. 1 reported on % always and often; 1 reported on % always; and 1 reported also on % always and often but asked a general question on # of cig. smoked and not specific to assessing nicotine dependence. It was decided not to run a meta-analysis on these as too different.

Assist – This included many different definitions of assist in quitting – some were general about assisting the patient to quit, and some included a more specific method of assisting such as counselling or setting a quit data.

Overall 34 different manuscripts included some kind of question on assisting. 4 manuscripts had data on women’s report on whether they recalled been offered any support to quit – these were general such as “Did your doctor or other HCP ever tell you (at least in one visit) about things you could do to quit smoking?”, recalled being offered assistance to quit by health providers; report that their provider offered suggestions for quitting, recall health providers offer support to quit smoking yes/no. 3 manuscripts reported on % reporting always and often helping their patients to set a specific quit data – this included a Likert scale of always and often, or arrange setting a quit data with at least 50% of their patients, or arranging this with most and all of their patients. Only 1 extra manuscript reported specifically on a quit date but included a general not specific Yes/No question - % reporting they negotiate a quit date with their patients – therefore this was not included in the meta-analysis. For “Assist-Often-Always-CessationSupport” the same principles as for ASK were applied here as well – ‘always and often’ was combined with ‘always and usually’, and with ‘most and all of the patients’ and with ‘to at least 50% of the patients’. Included in this were any questions using this measurement of general counselling or providing support or assistance – total 5 papers. An additional 5 papers were used for the meta-analysis for Assist-Yes-Counselling – this included any general questions about counselling Yes/No, any general statement of proportion reporting counselling. For Roske note that in the paper they separated based on those reporting providing counselling over 10 minutes and those reported providing brief counselling (under 10 minutes) – the total proportion providing counselling Yes/No was calculated combining these two together. Assist always often quit plan – only 2 papers included a measure about a quit plan and/or specific steps needed

1  
2  
3 to take to quit. Other papers included either other measures for these outcomes (for example a mean), or  
4 measured other assist such as assist by providing social support. These were different from each other so were  
5 not included in the meta-analysis.  
6

7 Arrange follow up – Measures were different from each other so no meta-analysis was done. 2 manuscripts  
8 included a measure of always/often general follow up with no mention of a time point; 1 reported % following  
9 up on all of the patients; 1 measured % always following up but within a week; and 2 reported always/often  
10 within a week.

11 Arrange referral – Similar to the principles used for ASK (see above) – 6 papers measured % always/often  
12 referring - always and usually, always and often, all and most of patients. 3 papers measured always – we  
13 decided not to do a meta-analysis due to limits of # of meta-analysis, and these were only 3.  
14

15 NRT – Same principles as for ASK regarding proportion reporting often/always prescribing NRT (4 papers) and  
16 proportion reporting always prescribing (4 papers). We also performed a meta-analysis on 6 papers that included  
17 a more general measurement of whether they prescribe or not – included in this were proportion reporting  
18 prescribing at least sometimes; proportion recalling prescribing NRT in pregnancy; proportion reporting using  
19 this method, proportion using this method currently.  
20  
21  
22  
23  
24  
25  
26  
27  
28  
29  
30  
31  
32  
33  
34  
35  
36  
37  
38  
39  
40  
41  
42  
43  
44  
45  
46  
47  
48  
49  
50  
51  
52  
53  
54  
55  
56  
57  
58  
59  
60

1  
2  
3  
4  
5  
6  
7  
8  
9  
10  
11  
12  
13  
14  
15  
16  
17  
18  
19  
20  
21  
22  
23  
24  
25  
26  
27  
28  
29  
30  
31  
32  
33  
34  
35  
36  
37  
38  
39  
40  
41  
42  
43  
44  
45  
46

Supplementary Forest Plot Figures 1-17

For peer review only

**Figure 1: Meta-analysis: Performance of "ASK" often/always**

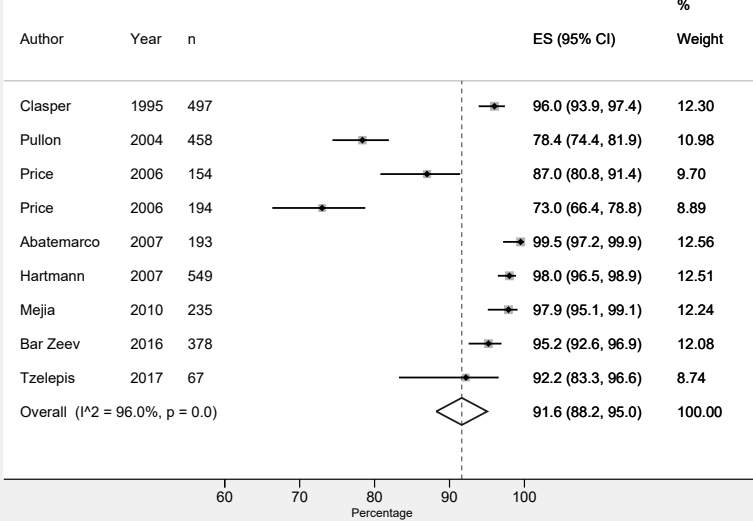

**Figure 2: Meta-analysis: Performance of "ASK" always/all**

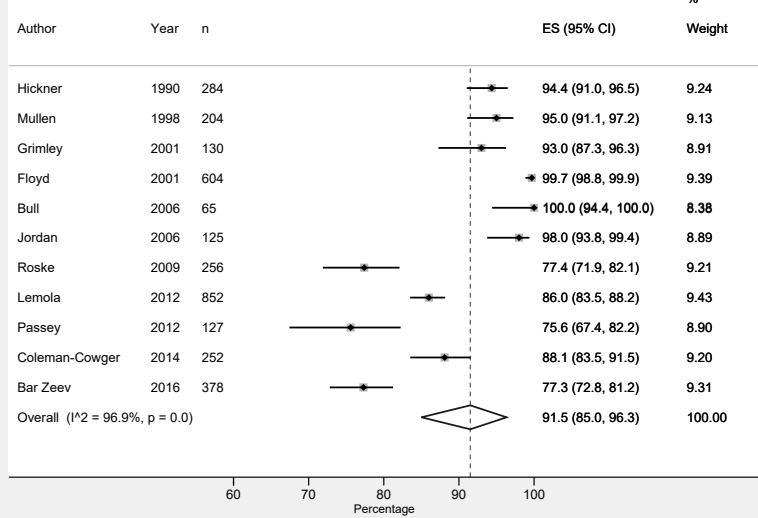

**Figure 3: Meta-analysis: Performance of "ASK" women's report**

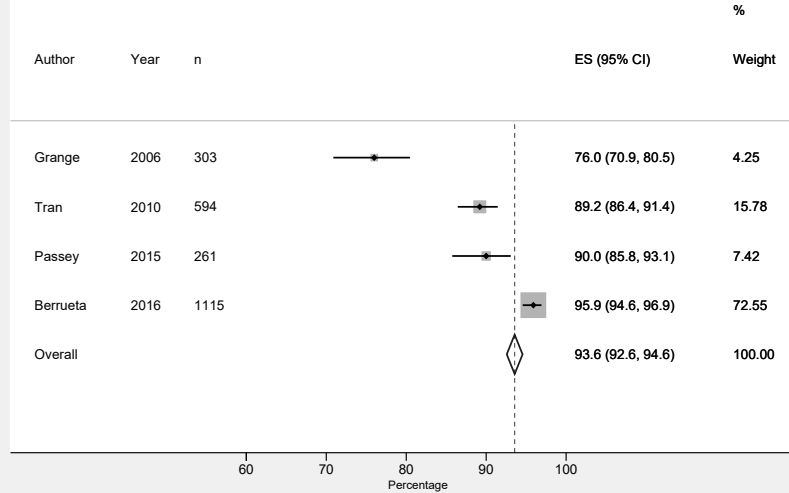

**Figure 4: Meta-analysis: Performance of "ADVISE" often/always**

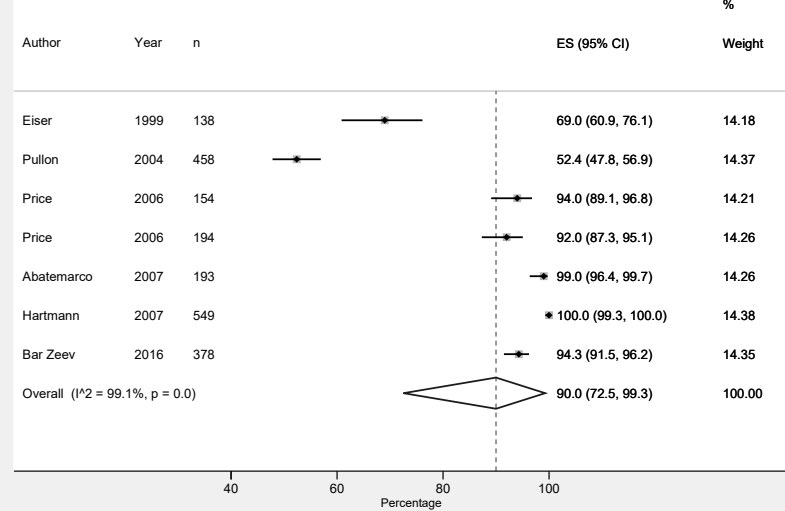

**Figure 5:** Meta-analysis: Performance of "ADVISE" always/all

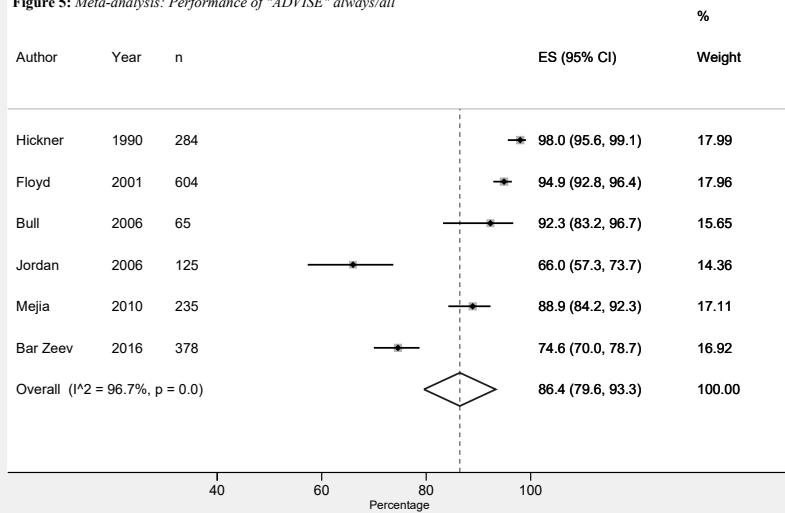

**Figure 6:** Meta-analysis: Performance of "ADVISE" Yes

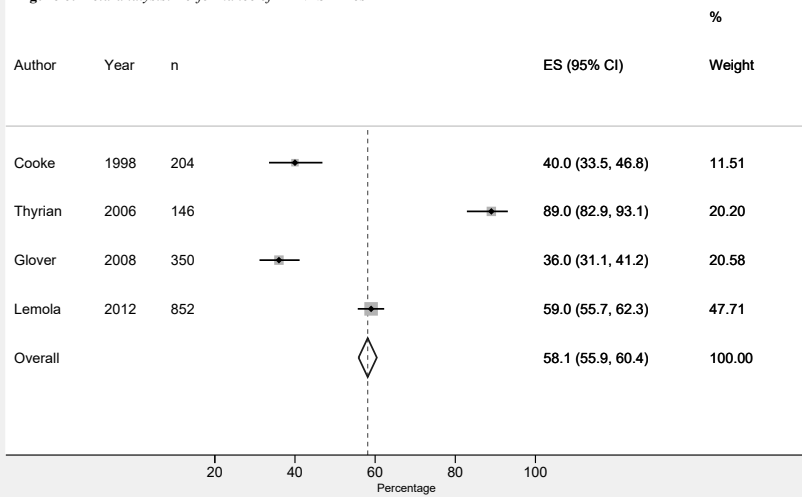

**Figure 7:** Meta-analysis: Performance of "ADVISE" women's report

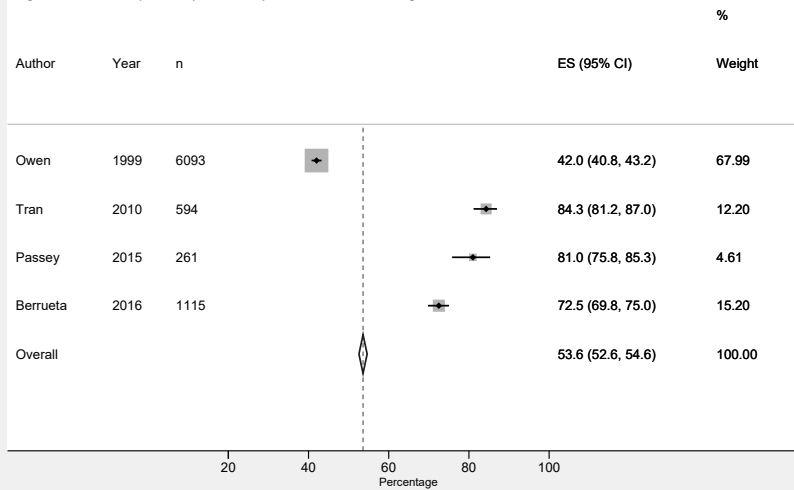

**Figure 8:** Meta-analysis: Performance of "ASSESS" Motivation to quit often/always

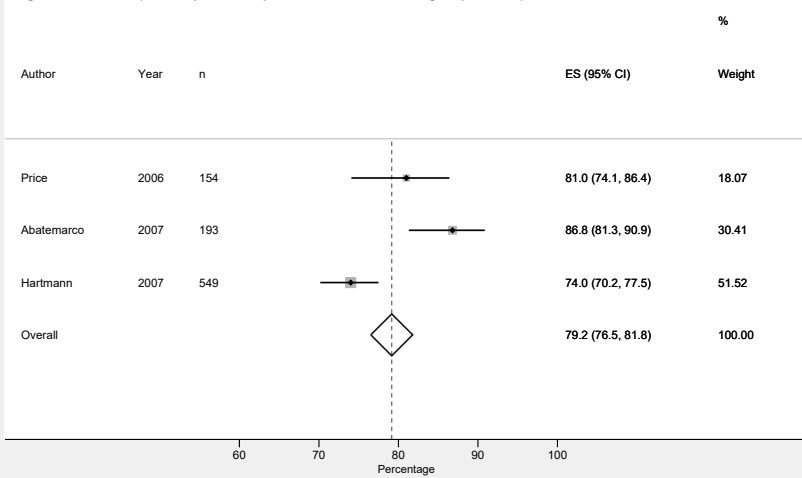

1  
2  
3  
4  
5  
6  
7  
8  
9  
10  
11  
12  
13  
14  
15  
16  
17  
18  
19  
20  
21  
22  
23  
24  
25  
26  
27  
28  
29  
30  
31  
32  
33  
34  
35  
36  
37  
38  
39  
40  
41  
42  
43  
44  
45  
46

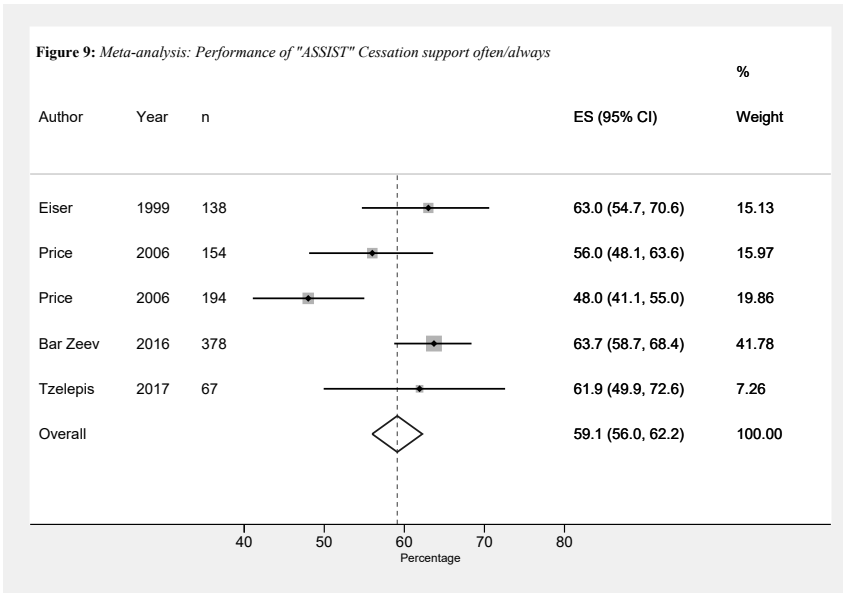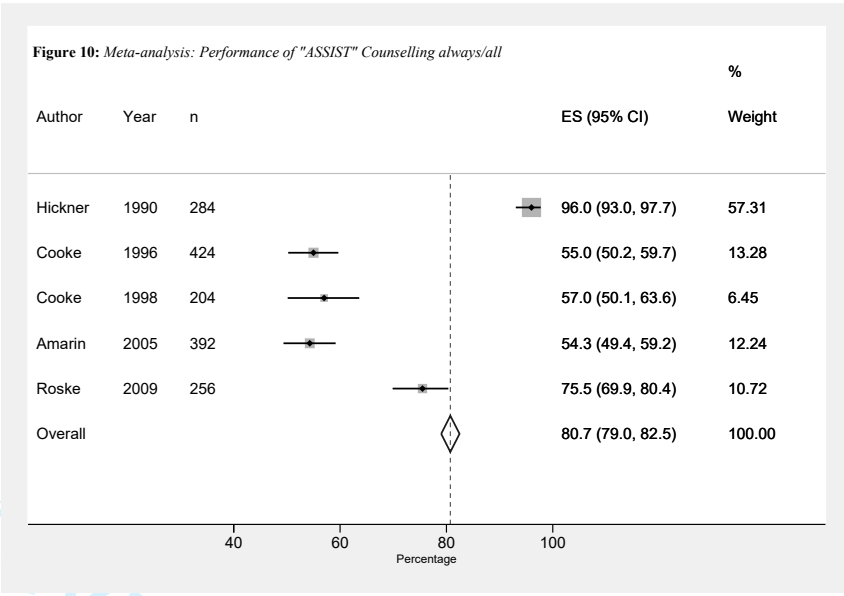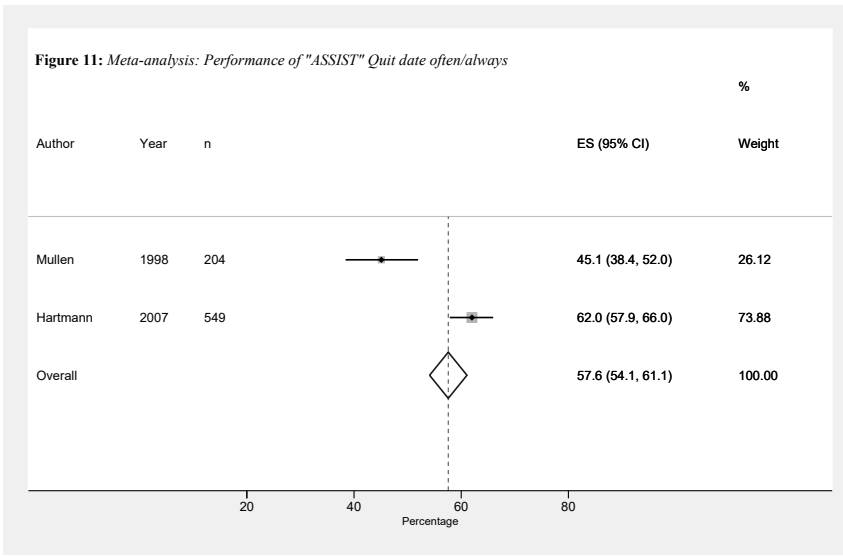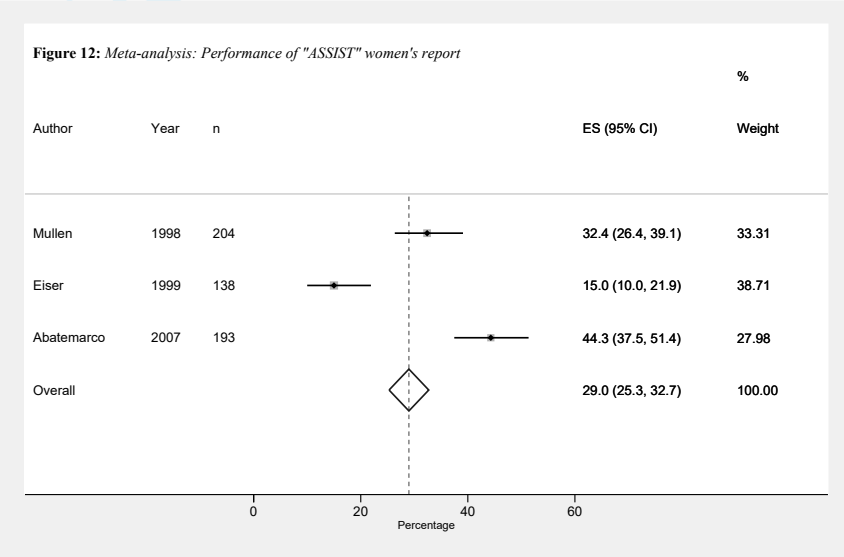

1  
2  
3  
4  
5  
6  
7  
8  
9  
10  
11  
12  
13  
14  
15  
16  
17  
18  
19  
20  
21  
22  
23  
24  
25  
26  
27  
28  
29  
30  
31  
32  
33  
34  
35  
36  
37  
38  
39  
40  
41  
42  
43  
44  
45  
46

Figure 13: Meta-analysis: Performance of "ASSIST" Quit plan often/always

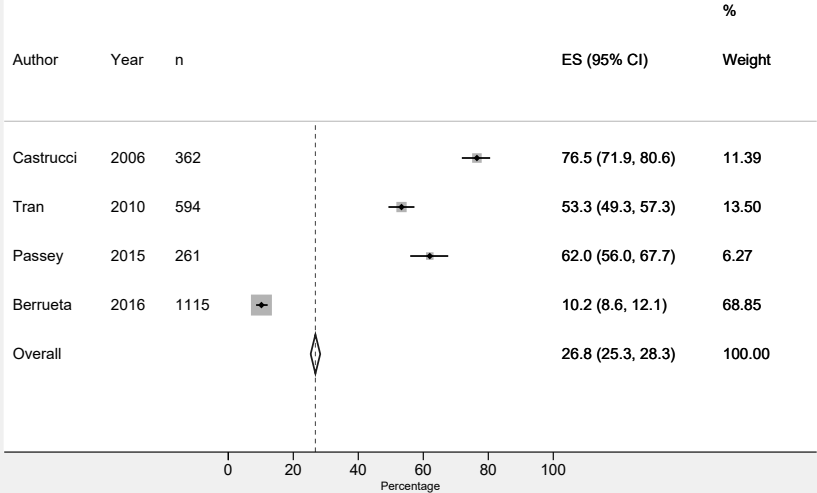

Figure 14: Meta-analysis: Performance of "ARRANGE" Referral often/always

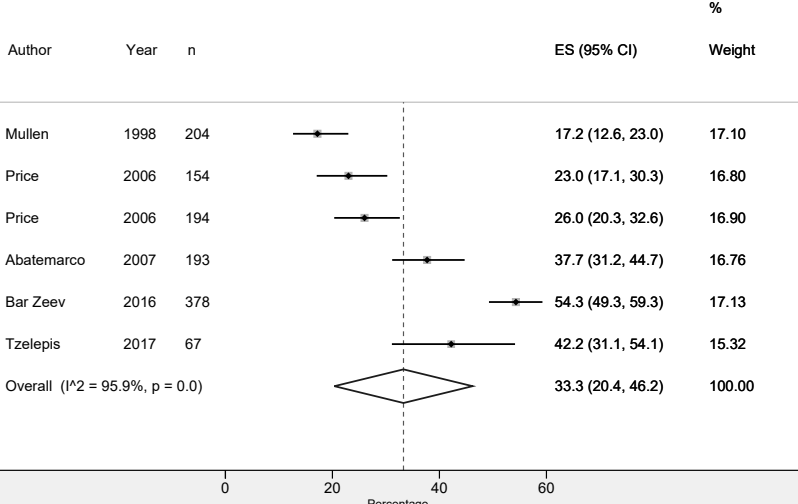

Figure 15: Meta-analysis: "Prescribing NRT" often/always

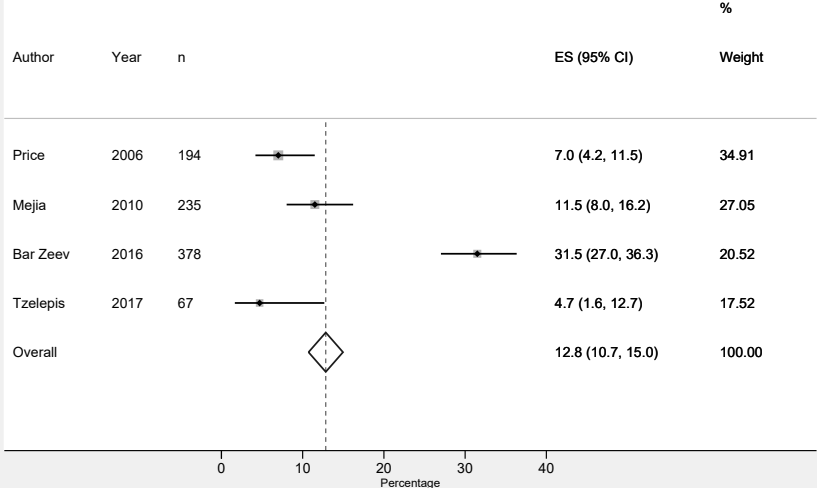

Figure 16: Meta-analysis: "Prescribing NRT" always/all

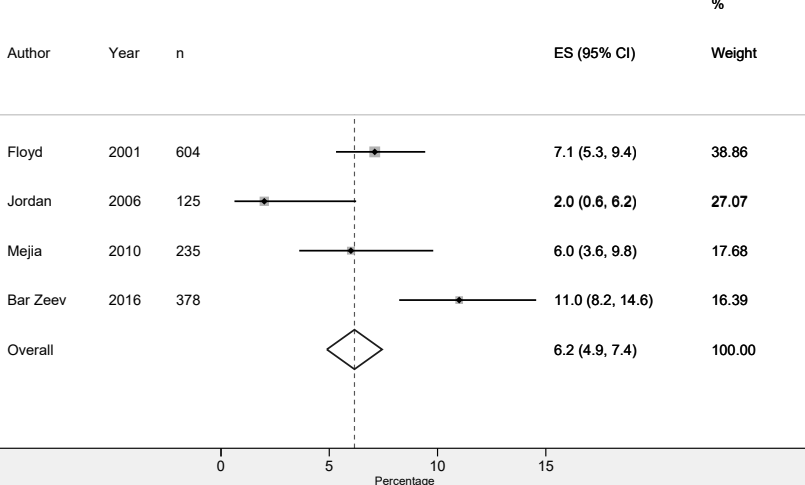



**Figure 17:** Meta-analysis: "Prescribing NRT" Yes

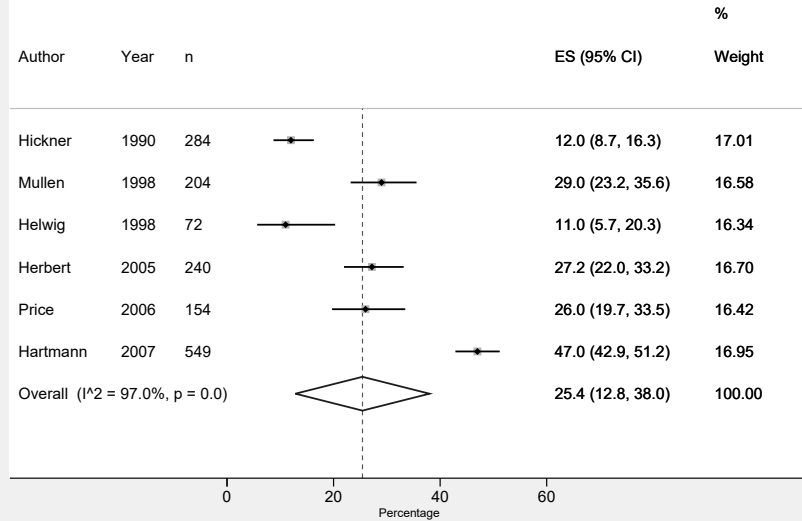

Review only

# Reporting checklist for meta-analysis of observational studies.

Based on the MOOSE guidelines.

## Instructions to authors

Complete this checklist by entering the page numbers from your manuscript where readers will find each of the items listed below.

Your article may not currently address all the items on the checklist. Please modify your text to include the missing information. If you are certain that an item does not apply, please write "n/a" and provide a short explanation.

Upload your completed checklist as an extra file when you submit to a journal.

In your methods section, say that you used the MOOSE reporting guidelines, and cite them as:

Stroup DF, Berlin JA, Morton SC, Olkin I, Williamson GD, Rennie D, Moher D, Becker BJ, Sipe TA, Thacker SB. Meta-analysis of observational studies in epidemiology: a proposal for reporting. Meta-analysis Of Observational Studies in Epidemiology (MOOSE) group. JAMA. 2000; 283(15):2008-2012.

|     | Reporting Item                                                                                                                                                                                                                                                                                                                     | Page Number |
|-----|------------------------------------------------------------------------------------------------------------------------------------------------------------------------------------------------------------------------------------------------------------------------------------------------------------------------------------|-------------|
| #1  | Identify the study as a meta-analysis of observational research                                                                                                                                                                                                                                                                    | NA          |
| #2  | Provide a structured summary including, as applicable: background; objectives; data sources; study eligibility criteria, participants, and interventions; study appraisal and synthesis methods; results; limitations; conclusions and implications of key findings; systematic review registration number (From PRISMA checklist) | 2-3         |
| #3a | Problem definition                                                                                                                                                                                                                                                                                                                 | 7           |
| #3b | Hypothesis statement                                                                                                                                                                                                                                                                                                               | NA          |
| #3c | Description of study outcomes                                                                                                                                                                                                                                                                                                      | 11-16       |
| #3d | Type of exposure or intervention used                                                                                                                                                                                                                                                                                              | NA          |
| #3e | Type of study designs used                                                                                                                                                                                                                                                                                                         | 9, 11       |

|    |          |     |                                                                          |      |
|----|----------|-----|--------------------------------------------------------------------------|------|
| 1  |          | #3f | Study population                                                         | 12   |
| 2  |          |     |                                                                          |      |
| 3  | Search   | #4a | Qualifications of searchers (eg, librarians and investigators)           | 8    |
| 4  | strategy |     |                                                                          |      |
| 5  |          |     |                                                                          |      |
| 6  |          |     |                                                                          |      |
| 7  |          | #4b | Search strategy, including time period included in the synthesis and     | 7    |
| 8  |          |     | keywords                                                                 |      |
| 9  |          |     |                                                                          |      |
| 10 |          |     |                                                                          |      |
| 11 |          | #4c | Effort to include all available studies, including contact with authors  | NA   |
| 12 |          |     |                                                                          |      |
| 13 |          | #4d | Databases and registries searched                                        | 7    |
| 14 |          |     |                                                                          |      |
| 15 |          | #4e | Search software used, name and version, including special features       | 7    |
| 16 |          |     | used (eg, explosion)                                                     |      |
| 17 |          |     |                                                                          |      |
| 18 |          |     |                                                                          |      |
| 19 |          | #4f | Use of hand searching (eg, reference lists of obtained articles)         | 7-8  |
| 20 |          |     |                                                                          |      |
| 21 |          | #4g | List of citations located and those excluded, including justification    | 7-8  |
| 22 |          |     |                                                                          |      |
| 23 |          |     |                                                                          |      |
| 24 |          | #4h | Method of addressing articles published in languages other than English  | NA   |
| 25 |          |     |                                                                          |      |
| 26 |          | #4i | Method of handling abstracts and unpublished studies                     | 8    |
| 27 |          |     |                                                                          |      |
| 28 |          | #4j | Description of any contact with authors                                  | NA   |
| 29 |          |     |                                                                          |      |
| 30 |          |     |                                                                          |      |
| 31 |          | #5a | Description of relevance or appropriateness of studies gathered for      | 9-10 |
| 32 |          |     | assessing the hypothesis to be tested                                    |      |
| 33 |          |     |                                                                          |      |
| 34 |          |     |                                                                          |      |
| 35 |          | #5b | Rationale for the selection and coding of data (eg, sound clinical       | 8    |
| 36 |          |     | principles or convenience)                                               |      |
| 37 |          |     |                                                                          |      |
| 38 |          |     |                                                                          |      |
| 39 |          | #5c | Documentation of how data were classified and coded (eg, multiple        | 8-9  |
| 40 |          |     | raters, blinding, and interrater reliability)                            |      |
| 41 |          |     |                                                                          |      |
| 42 |          | #5d | Assessment of confounding (eg, comparability of cases and controls in    | NA   |
| 43 |          |     | studies where appropriate)                                               |      |
| 44 |          |     |                                                                          |      |
| 45 |          |     |                                                                          |      |
| 46 |          | #5e | Assessment of study quality, including blinding of quality assessors;    | 9    |
| 47 |          |     | stratification or regression on possible predictors of study results     |      |
| 48 |          |     |                                                                          |      |
| 49 |          |     |                                                                          |      |
| 50 |          | #5f | Assessment of heterogeneity                                              | 10   |
| 51 |          |     |                                                                          |      |
| 52 |          | #5g | Description of statistical methods (eg, complete description of fixed or | 10   |
| 53 |          |     | random effects models, justification of whether the chosen models        |      |
| 54 |          |     | account for predictors of study results, dose-response models, or        |      |
| 55 |          |     | cumulative meta-analysis) in sufficient detail to be replicated          |      |
| 56 |          |     |                                                                          |      |
| 57 |          |     |                                                                          |      |
| 58 |          |     |                                                                          |      |
| 59 |          |     |                                                                          |      |
| 60 |          |     |                                                                          |      |

|    |     |                                                                                                                           |       |
|----|-----|---------------------------------------------------------------------------------------------------------------------------|-------|
| 1  | #5h | Provision of appropriate tables and graphics                                                                              | 11    |
| 2  |     |                                                                                                                           |       |
| 3  | #6a | Graphic summarizing individual study estimates and overall estimate                                                       | NA    |
| 4  |     |                                                                                                                           |       |
| 5  | #6b | Table giving descriptive information for each study included                                                              | 8     |
| 6  |     |                                                                                                                           |       |
| 7  |     |                                                                                                                           |       |
| 8  | #6c | Results of sensitivity testing (eg, subgroup analysis)                                                                    | 10-11 |
| 9  |     |                                                                                                                           |       |
| 10 | #6d | Indication of statistical uncertainty of findings                                                                         | 11    |
| 11 |     |                                                                                                                           |       |
| 12 | #7a | Quantitative assessment of bias (eg, publication bias)                                                                    | NA    |
| 13 |     |                                                                                                                           |       |
| 14 | #7b | Justification for exclusion (eg, exclusion of non-English-language citations)                                             | NA    |
| 15 |     |                                                                                                                           |       |
| 16 |     |                                                                                                                           |       |
| 17 |     |                                                                                                                           |       |
| 18 | #7c | Assessment of quality of included studies                                                                                 | 18    |
| 19 |     |                                                                                                                           |       |
| 20 |     |                                                                                                                           |       |
| 21 | #8a | Consideration of alternative explanations for observed results                                                            | 21    |
| 22 |     |                                                                                                                           |       |
| 23 | #8b | Generalization of the conclusions (ie, appropriate for the data presented and within the domain of the literature review) | 21    |
| 24 |     |                                                                                                                           |       |
| 25 |     |                                                                                                                           |       |
| 26 |     |                                                                                                                           |       |
| 27 | #8c | Guidelines for future research                                                                                            | 21    |
| 28 |     |                                                                                                                           |       |
| 29 | #8d | Disclosure of funding source                                                                                              | 22    |
| 30 |     |                                                                                                                           |       |
| 31 |     |                                                                                                                           |       |

Reproduced with permission from JAMA. 2000. 283(15):2008-2012. Copyright © 2000 American Medical Association. All rights reserved. This checklist was completed on 14. August 2018 using <http://www.goodreports.org/>, a tool made by the [EQUATOR Network](#) in collaboration with [Penelope.ai](#)

# BMJ Open

## What components of smoking cessation care during pregnancy are implemented by health providers? a systematic review and meta-analysis

|                                 |                                                                                                                                                                                                                                                                                                                                                                                                                                                                                                            |
|---------------------------------|------------------------------------------------------------------------------------------------------------------------------------------------------------------------------------------------------------------------------------------------------------------------------------------------------------------------------------------------------------------------------------------------------------------------------------------------------------------------------------------------------------|
| Journal:                        | <i>BMJ Open</i>                                                                                                                                                                                                                                                                                                                                                                                                                                                                                            |
| Manuscript ID                   | bmjopen-2018-026037.R2                                                                                                                                                                                                                                                                                                                                                                                                                                                                                     |
| Article Type:                   | Research                                                                                                                                                                                                                                                                                                                                                                                                                                                                                                   |
| Date Submitted by the Author:   | 19-Jun-2019                                                                                                                                                                                                                                                                                                                                                                                                                                                                                                |
| Complete List of Authors:       | Gould, Gillian; The University of Newcastle, School of Medicine and Public Health;<br>Twyman, Laura<br>Stevenson, Leah; The University of Newcastle, School of Medicine and Public Health<br>Gribbin, Gabrielle; The University of Newcastle, School of Medicine and Public Health<br>Bonevski, Billie; University of Newcastle, School of Medicine & Public Health<br>Palazzi, Kerrin; Hunter Medical Research Institute<br>Bar Zeev, Yael; University of Newcastle, School of Medicine and Public Health |
| <b>Primary Subject Heading</b>: | Smoking and tobacco                                                                                                                                                                                                                                                                                                                                                                                                                                                                                        |
| Secondary Subject Heading:      | Health services research, Addiction                                                                                                                                                                                                                                                                                                                                                                                                                                                                        |
| Keywords:                       | Maternal medicine < OBSTETRICS, PRIMARY CARE, PUBLIC HEALTH, Substance misuse < PSYCHIATRY                                                                                                                                                                                                                                                                                                                                                                                                                 |
|                                 |                                                                                                                                                                                                                                                                                                                                                                                                                                                                                                            |

SCHOLARONE™  
Manuscripts

1  
2  
3 **What components of smoking cessation care during pregnancy are implemented by**  
4  
5 **health providers? a systematic review and meta-analysis**  
6  
7  
8  
9

10 Gillian S Gould<sup>1 2</sup>, (corresponding author) [gillian.gould@newcastle.edu.au](mailto:gillian.gould@newcastle.edu.au)

11  
12 Laura Twyman<sup>1</sup>, [Laura.Twyman@newcastle.edu.au](mailto:Laura.Twyman@newcastle.edu.au)

13  
14 Leah Stevenson<sup>1</sup>, [leah.stevenson@my.jcu.edu.au](mailto:leah.stevenson@my.jcu.edu.au)

15  
16 Gabrielle R Gribbin,<sup>1</sup> [gabrielle.gribbin@newcastle.edu.au](mailto:gabrielle.gribbin@newcastle.edu.au)

17  
18 Billie Bonevski<sup>1</sup>, [billie.bonevski@newcastle.edu.au](mailto:billie.bonevski@newcastle.edu.au)

19  
20 Kerrin Palazzi<sup>2</sup>, [Kerrin.Palazzi@hmri.org.au](mailto:Kerrin.Palazzi@hmri.org.au)

21  
22 Yael Bar-Zeev<sup>1</sup> [Yael.BarZeev@uon.edu.au](mailto:Yael.BarZeev@uon.edu.au)

23  
24  
25  
26  
27  
28 <sup>1</sup> School of Medicine and Public Health, University of Newcastle, New South Wales (NSW),  
29  
30 Australia

31  
32  
33 <sup>2</sup>Hunter Medical Research Institute, NSW, Australia  
34  
35  
36  
37  
38  
39  
40  
41  
42  
43  
44  
45  
46  
47  
48  
49  
50  
51  
52  
53  
54  
55  
56  
57  
58  
59  
60

## Abstract

**Background** Pregnancy is an opportunity for health providers to support women to stop smoking.

**Objectives** Identify the pooled prevalence for health providers in providing components of smoking cessation care to women who smoke during pregnancy.

**Design** A systematic review synthesising original articles that reported on 1) prevalence of health providers' performing the 5As ('Ask', 'Advise', 'Assess', 'Assist', 'Arrange'), prescribing nicotine replacement therapy (NRT), and 2) factors associated with smoking cessation care.

**Data Sources** MEDLINE, EMBASE, CINAHL and PsycINFO databases searched using "smoking", "pregnancy" and "health provider practices".

**Eligibility criteria for selecting studies** Studies included any design except interventions (self-report, audit, observed consultations, women's reports), in English, with no date restriction, up to June 2017.

**Participants** Health providers of any profession

**Data extraction, appraisal and analysis** Data were extracted, then appraised with the Hawker tool. Meta-analyses pooled percentages for performing each of the 5As and prescribing NRT, using e.g., 'often/always' and 'always/all'. Meta-regressions were performed of 5As for 'often/always'.

**Results** Of 3933 papers, 54 were included ( $n = 29,225$  participants): 33 for meta-analysis. Health providers included general practitioners, obstetricians, midwives and others from 10

1  
2  
3 countries. Pooled percentages of studies reporting practices ‘often/always’ were: ‘Ask’ ( $n=9$ )  
4 91.6% (95%CI:88.2,95); ‘Advise’ ( $n=7$ ) 90% (CI:72.5,99.3), ‘Assess’ ( $n=3$ ) 79.2%  
5  
6 (CI:76.5,81.8), ‘Assist (cessation support)’ ( $n=5$ ) 59.1% (CI:56, 62.2), ‘Arrange (referral)’  
7  
8 ( $n=6$ ) 33.3% (CI:20.4,46.2), and ‘prescribing NRT’ ( $n=6$ ) 25.4% (CI:12.8,38). Heterogeneity  
9  
10 ( $I^2$ ) was 95.9%-99.1%. Meta-regressions for ‘Arrange’ were significant for year ( $p=0.013$ )  
11  
12 and country ( $p=0.037$ ).  
13  
14  
15  
16  
17

18 **Conclusions** Health providers ‘Ask’, ‘Advise’ and ‘Assess’ most pregnant women about  
19  
20 smoking. ‘Assist’, ‘Arrange’ and ‘prescribing NRT’ are reported at lower rates: strategies to  
21  
22 improve these should be considered.  
23  
24  
25

26 **Registration** PROSPERO 2015:CRD42015029989.  
27  
28  
29  
30

### 31 **Strengths and limitations of this study**

- 32  
33 • Comprehensive meta-analysis and meta-regression of health providers  
34  
35 implementation of the 5As combining like measures for smoking cessation care.
- 36  
37 • Fifty four studies from 7 high-income and three low-middle income countries  
38  
39 includes disciplines of medicine, nursing, and allied health.
- 40  
41 • High heterogeneity in the meta-analyses was unexplained by the meta-regressions,  
42  
43 except for ‘Arrange referral-often/always’ which was related to year, and country
- 44  
45 • Quality ratings of some papers were poor - findings from these studies may be less  
46  
47 reliable.
- 48  
49 • Review aids in determining which components of smoking cessation care are less  
50  
51 reliably implemented in pregnancy.  
52  
53  
54  
55  
56  
57  
58  
59  
60

**Keywords:** smoking, health care providers, smoking cessation, maternal health, pregnancy



1  
2  
3 **Word count: 4724**  
4  
5  
6  
7  
8  
9  
10  
11  
12  
13  
14  
15  
16  
17  
18  
19  
20  
21  
22  
23  
24  
25  
26  
27  
28  
29  
30  
31  
32  
33  
34  
35  
36  
37  
38  
39  
40  
41  
42  
43  
44  
45  
46  
47  
48  
49  
50  
51  
52  
53  
54  
55  
56  
57  
58  
59  
60

For peer review only

## Introduction

Smoking during pregnancy carries high risks for mother and child, including obstetric complications for the mother,<sup>1</sup> and for the baby, premature birth, growth restriction, low birth weight, still-birth, and congenital defects.<sup>1,2</sup> Longer-term effects on the child include respiratory illnesses, learning and behavioral problems, and increased risks of chronic diseases,<sup>1,2</sup> and of taking up smoking in adolescence.<sup>3</sup>

Smoking during pregnancy remains a prevalent behaviour in many countries, with estimated smoking prevalence rates ranging from 0.2% to 38.4%.<sup>4</sup> Pregnancy is a time when women are more likely to be motivated to stop smoking.<sup>5</sup> However, disadvantaged women, including women from minority and Indigenous populations where there is a high prevalence of community smoking, also smoke at higher rates and are less likely to try to stop smoking, or succeed than more advantaged women among whom smoking prevalence is lower.<sup>6, 7</sup> Also, less likely to stop smoking are women who are: of low socio-economic status,<sup>6</sup> multiparous,<sup>6</sup> adolescents,<sup>8</sup> partnered by smokers,<sup>6</sup> and those experiencing: alcohol or substance use,<sup>8</sup> depression,<sup>9</sup> life stressors,<sup>10,11</sup> or intimate partner violence.<sup>12</sup> Women frequently reduce tobacco consumption when discovering they are pregnant,<sup>11,13</sup> indicating a consciousness about the risks, but may be less likely to abstain than non-pregnant women.<sup>14</sup> Pregnant women report a lack of support for smoking cessation, and that health providers (HP) consider cutting down to be acceptable.<sup>15,16</sup>

HPs in primary care have a critical role to offer advice and support women to stop smoking during pregnancy.<sup>17</sup> Ideally smoking cessation care (SCC) includes counselling and pharmacotherapy – most successful when combined.<sup>17,18</sup> In pregnancy, the effective use of

1  
2  
3 pharmacotherapy is less certain, and clinical guidelines vary across and within different  
4 countries.<sup>17</sup> In pregnancy, only nicotine replacement therapy (NRT) is recommended, but not  
5 consistently advised for use in pregnancy in all countries,<sup>17,19</sup> for example NRT is not advised  
6 in the USA for use in pregnancy,<sup>20</sup> but it is more routinely prescribed in the UK.<sup>21</sup> Clinical  
7 guidelines in the UK, Australia, New Zealand and Canada recommend that a woman should  
8 initially endeavour to quit without medication, but if she cannot, NRT can be prescribed.<sup>17 22-</sup>  
9

10  
11  
12  
13  
14  
15  
16  
17 25

18  
19  
20  
21 The 5As ('Ask (about smoking)', 'Advise (to quit)', 'Assess (motivation and/or  
22 dependence)', 'Assist (with cessation)', and 'Arrange (follow-up or referral)') has been  
23 adopted in many countries as a strategy for HPs to deliver all the important components of  
24 SCC.<sup>26</sup> Several studies have examined the performance of the 5As in pregnancy. Two  
25 reviews summarised the literature . Okoli et al's integrative review reported on HP  
26 performance of components of the 5As. While authors reported more than 50% of HPs Ask  
27 and Advise about smoking, and less than 50% Assess, Assist or Arrange (referral or follow-  
28 up), it is unclear how these estimates were calculated. This is an important limitation  
29 considering the variable ways studies collect data and report them,<sup>27</sup> Baxter et al's qualitative  
30 systematic review, on the factors that influenced uptake of interventions by pregnant women,  
31 included studies on HP and women's reports of their receipt of SCC, and noted variation  
32 between HPs for recording smoking status and advice.<sup>28</sup> As neither review included a meta-  
33 analysis, it is timely and important from the point of view of rigour to have a definitive  
34 evaluation of HP practices, and furthermore to accurately inform recommendations to guide  
35 strategies to improve SCC. An urgent need for research to increase the uptake of smoking  
36 cessation interventions, and improve quit rates in pregnant women who smoke has been  
37 identified by Siddiqi and Mdege<sup>29</sup>  
38  
39  
40  
41  
42  
43  
44  
45  
46  
47  
48  
49  
50  
51  
52  
53  
54  
55  
56  
57  
58  
59  
60

1  
2  
3  
4  
5  
6 The objective of this systematic review was to summarise published empirical research of  
7  
8 eligible studies from a range of HPs who consult with pregnant women who smoke, and  
9  
10 synthesise findings with meta-analyses where feasible. The primary aim was to determine the  
11  
12 prevalence of the components of SCC that were being practiced, including the 5As,  
13  
14 prescribing NRT, and related behaviour change techniques (BCTs - observable and replicable  
15  
16 components designed to change behaviour),<sup>30</sup> thus determine which aspects of SCC need  
17  
18 improvement. A second aim was to examine which factors were associated with delivery of  
19  
20 the 5As, and NRT prescribing i.e., HP types, country, year, and pregnant women in high-risk  
21  
22 populations. We also examined data about knowledge and attitudes of the HPs to inform their  
23  
24 practices. We also examined data about knowledge and attitudes of the HPs to inform their  
25  
26 practices.  
27  
28  
29  
30

## 31 **Methods**

32  
33  
34  
35  
36 Data were identified by searches of MEDLINE, EMBASE, CINAHL and PsycINFO, and  
37  
38 reference lists from relevant articles. Where possible, search terms were matched to MESH  
39  
40 or database specific subject headings, and used as keywords. Search terms included  
41  
42 (Supplementary File Table 1): pregnancy (e.g., perinatal care, mother), smoking (e.g.,  
43  
44 nicotine dependence, smoking cessation), health professional (e.g., general practitioner,  
45  
46 midwife), and attitudes or practices (e.g., capacity, belief). Searches were performed in  
47  
48 September 2015; additional studies included until June 2017.  
49  
50  
51  
52  
53

54 Inclusion criteria: peer-reviewed full papers on SCC to pregnant smokers by any HP in  
55  
56 any setting, restricted to English language, with no date restrictions. Quantitative  
57  
58 studies and/or quantitative data from mixed methods studies with any study design  
59  
60

1  
2  
3 were included, comprising self-reported provision of SCC by HPs, reported receipt of  
4 SCC by pregnant women, or other indicators e.g., chart audit or audio-recordings of  
5 consultations. For this review, SCC was based on the 5As: asking about smoking,  
6  
7 advising about quitting, assessing motivation to stop smoking or nicotine dependence,  
8  
9 assisting to quit, and arranging follow up or referral.<sup>26</sup> In addition, we included papers  
10 reporting HP knowledge, attitudes, and other practices e.g., advising about relapse and  
11 smoke-free homes, discussing psychosocial contexts of smoking, involving family  
12 members or partners, prescribing NRT, and other BCTs (e.g., setting a quit date,  
13 making a quit plan, providing resources and self-help materials, aiding social support,  
14 encouraging smoke-free environments, and monitoring carbon monoxide readings).<sup>31,32</sup>  
15  
16 Exclusion criteria: intervention studies and studies in non-peer-reviewed literature;  
17  
18 studies on pre-conceptual and post-natal care. Additionally, 10 papers that did not have  
19 a main focus on the review topic and/or reported minimal data about the topic such as  
20 one line or one data item in a full paper, were excluded (list available from authors on  
21 request). The review was registered with PROSPERO 2015: CRD42015029989. We  
22 used the MOOSE checklist when writing our report.<sup>33</sup>  
23  
24  
25  
26  
27  
28  
29  
30  
31  
32  
33  
34  
35  
36  
37  
38  
39  
40  
41

42 Two researchers (LT – behavioural scientist, YB - physician) independently screened titles,  
43 abstracts, and then full papers and applied the inclusion criteria to determine eligibility.

44  
45 Discrepancies were resolved by consensus, with a third researcher (GSG) acting as  
46 adjudicator, when agreement was not reached. Studies that met all criteria were retained for  
47 full review. One researcher completed data extraction (LS) with a second (YB) extracting  
48 20% of articles, then results compared. A summary table (Supplementary File Table 2) was  
49 developed from this data (GRG, GSG). The characteristics of each study were examined  
50 including aims, setting, country, sample characteristics, study focus (HP or women), HP type,  
51  
52  
53  
54  
55  
56  
57  
58  
59  
60

1  
2  
3 study design and method, measures, extracted results for each of the 5As, prescription of  
4  
5 NRT, and whether the study addressed the provision of BCTs, and if so a description of the  
6  
7 BCTs (e.g., setting a quit date, increasing self-efficacy, monitoring carbon monoxide reading,  
8  
9 validating abstinence).

10  
11  
12  
13  
14 As the studies overall were of all types of design, a quality assessment of the quantitative and  
15  
16 mixed studies was carried out using Hawker et al's tool for reviewing disparate data  
17  
18 systematically.<sup>34</sup> This was chosen in the absence on any consensus on the best tool, as we  
19  
20 were including quantitative and mixed method studies in the review. LS rated all studies  
21  
22 using the tool (20% double-rated by YB). Studies were included irrespective of quality.  
23  
24  
25  
26  
27

28  
29 Quantitative data were presented as percentages and counts were possible, and meta-analyses  
30  
31 made for estimates of each of the 5As of SCC provision, and prescribing NRT. A narrative  
32  
33 analysis summarises other studies or outcomes, including BCTs where reported. For each  
34  
35 outcome measure we looked at the specific measurements across studies to determine  
36  
37 whether it was clinically appropriate to group them together i.e., Ask, Advise, Assess  
38  
39 (motivation to quit, nicotine dependence), Assist (cessation support, quit date, quit plan,  
40  
41 prescribe NRT), Arrange (follow up, referral). To achieve this, we considered both the data  
42  
43 collection method (cross-sectional survey; audit of patients' medical records; audio-recording  
44  
45 of consultation; women's report through survey or interview) and the measure itself that was  
46  
47 used (e.g., Likert scale, or a dichotomous Yes/No response, and so forth). General principles  
48  
49 applied were as followed (explained in more detail in Supplementary Text 1):  
50  
51  
52  
53  
54  
55  
56  
57  
58  
59  
60

- **‘Often/Always’** included survey measures reflecting asking ‘often’ and ‘always’, ‘usually and always’; and/or ‘most of the time’ and ‘all of the time’). The combined answers in Likert scales were dichotomised for analysis.
- **‘Always/all’** included in this analysis was the proportion of HPs answering ‘always’ or ‘all of the time’, if a Likert scale was used, or the proportion answering ‘Yes’ if a dichotomous question was used: either asking ‘do you ask all of your patients?’ or ‘do you ask your patients always?’ Answers reporting on ‘Asking’ more than 75% of their patients were considered as ‘Yes’ for these analyses.
- **‘Yes’** where a survey asked the HP a dichotomous question for example ‘Do you advise? Yes/No’ were grouped separately as “Advise - Yes”
- Papers describing women’s reports were analysed separately from those describing health provider reports

All statistical analyses were programmed using Stata v13.1 (StataCorp LP, College Station, TX, USA). Meta-analyses were performed to examine the performance of each of the 5As, including prescribing NRT, as above. Stata program *Metaprop* was used to pool dichotomized responses for each of the 5As. If more than 5 studies were pooled, random effects modelling (DerSimonian and Laird’s method) was used to account for differences in underlying estimates due to study population and design; heterogeneity ( $I^2$ ) was measured for each reporting type. If the number of studies was low ( $\leq 5$ ), fixed effects modelling was used as the between-studies variance (tau-squared), and therefore the mean of the underlying random distribution cannot be estimated with precision; heterogeneity is not presented.<sup>35</sup> Where required, in order to include studies where the percent reporting the outcome was 100%, the Freeman-Tukey Double Arcsine Transformation method was used to stabilize the

1  
2  
3 variances prior to pooling. Pooled estimates for study outcomes were split by response, and  
4  
5 also by HP type. Significance was set as  $\alpha=0.05$  a priori.  
6  
7  
8  
9

10 For the 'often/always' responses to Ask, Advise, Assist, Arrange, including prescribing NRT,  
11  
12 meta-regression (Stata program *Metareg*) was used to examine whether some of the  
13  
14 heterogeneity seen in the proportions reported for each study could be explained by HP type  
15  
16 (e.g. midwife, general practitioners (GP), obstetricians (OBS), or mixed groups of HPs),  
17  
18 high-risk population versus not (e.g., women in low socio-economic groups, Indigenous  
19  
20 women, or with mental health diagnoses), country (USA, Europe, Australia/New Zealand, or  
21  
22 Other), or year of publication (1990-2017). P-value, changes in heterogeneity ( $I^2$  residual),  
23  
24 changes in between study variance ( $\tau^2$ ), and proportion of between-study variance explained  
25  
26 by predictor (adjusted  $R^2$ ) were reported. For year, the linearity of proportion over time was  
27  
28 examined, and if a non-linear trend was seen then the meta-regression was not performed.  
29  
30  
31  
32  
33  
34  
35  
36  
37  
38  
39  
40  
41  
42  
43  
44  
45  
46  
47  
48  
49  
50  
51  
52  
53  
54  
55  
56  
57  
58  
59  
60

Meta-regressions for the other meta-analyses were not performed.

An analysis of agreement of quality-rating coders was performed. Weighted kappa  
(ordinal multi-rater - quadratic weighted Kappa) was used to compare the rating of 9  
quality study criteria for 15 studies; each criteria was scored on a 5 point scale (Very  
poor, Poor, Fair, Good, Very Good). Mean (SD) ratings were calculated for each  
criteria for each rater. Kappa and weighted kappa estimates were interpreted using cut-  
off criteria specified by Altman.<sup>36</sup> Strength of agreement was < 0.20 Poor; 0.21 - 0.40  
Fair; 0.41 - 0.60 Moderate; 0.61 - 0.80 Good; 0.81 - 1.00 Very Good.

Patient and Public Involvement



1  
2  
3 As a systematic review we did not directly involve any patients or public in the study.  
4  
5 However the review was informed by patient and health provider needs. Participants from  
6  
7 previous studies reported to us that they were not receiving comprehensive smoking cessation  
8  
9 care during pregnancy from their health providers,<sup>16</sup> nor were health providers in a previous  
10  
11 study reporting they delivered comprehensive smoking cessation care.<sup>37</sup> This review was  
12  
13 responsive to global knowledge about the receipt and delivery of smoking cessation care in  
14  
15 pregnancy being a gap in the literature.  
16  
17  
18  
19  
20  
21

## 22 **Results**

23  
24  
25  
26  
27 Of the 3933 studies found, 54 papers met the inclusion criteria for quantitative review. See  
28  
29 Prisma Flow Chart for included studies (Figure 1).  
30  
31  
32

33  
34 A total of 54 studies were included in this analysis.<sup>37-90</sup> Study details including author,  
35  
36 country, study focus (HP, women, or both), population and risk category (high/low), study  
37  
38 aims, inclusion of 5As, and summary of results are presented in Supplementary File Table 2.  
39  
40 Of these studies, approximately 90% were quantitative ( $n = 49$ ),<sup>38-43,45,48-64,66-75,77-91</sup> and  
41  
42 approximately 10% ( $n = 5$ ) utilized mixed methods, containing both quantitative and  
43  
44 qualitative aspects.<sup>44,46,47,65,76</sup> The included studies used the following study methods: survey  
45  
46 ( $n = 48$ ),<sup>38-45,48-62,64-67,69-81,84-91</sup> audio-recordings ( $n = 2$ ),<sup>46,47</sup> audit ( $n = 2$ ),<sup>82,83</sup> audit with  
47  
48 interview ( $n = 1$ ),<sup>63</sup> and observational ( $n = 1$ ).<sup>68</sup>  
49  
50  
51  
52

53  
54 Study location included seven high income countries (United States of America,<sup>38,45,49,54,57-  
55  
56 59,61,65,71,78,79,86</sup> United Kingdom,<sup>44,48,52,60,74</sup> Australia,<sup>51,75,76,87,90,91</sup> Germany,<sup>81,84  
57  
58 Switzerland,<sup>66</sup> New Zealand,<sup>55,56,80</sup> France,<sup>46</sup>) and three low to middle income countries  
59  
60 (Jordan, Argentina, and Uruguay).<sup>28,32,59</sup></sup>

1  
2  
3  
4  
5  
6 Included studies focused on either HPs ( $n = 39$ , 72%),<sup>38,39,41,43,44,47-55,57-61,65,66,68-73,75,78-</sup>  
7  
8 81,83,84,87-91 pregnant women ( $n = 12$ , 22%),<sup>40,42,45,56,62,63,67,74,76,82,85,86</sup> or both HPs and pregnant  
9  
10 women ( $n = 3$ , 6%).<sup>46,64,77</sup> Studies encompassing HPs included obstetricians and  
11  
12 gynaecologists (OBS) ( $n = 9$ , 21%),<sup>39,49,53,54,57,65,71,73,79</sup> midwives ( $n = 7$ , 17%),<sup>38,41,51,52,64,72,84</sup>  
13  
14 general practitioners (GPs) ( $n = 3$ , 7%),<sup>60,61,68</sup> multiple professions (e.g., OBS, GPs, nurses,  
15  
16 healthcare assistants;  $n = 21$ , 50%),<sup>43,44,46-48,50,55,58,59,66,69,70,75,77,79-81,87,89-91</sup> or did not report the  
17  
18 profession ( $n = 1$ , 2%).<sup>83</sup>  
19  
20  
21

22  
23 Out of the 54 papers, information on Ask, Advise, Assess, Assist and Arrange (follow  
24  
25 up/referral) was reported by approximately 68%, 70%, 28%, 63%, and 54% of studies,  
26  
27 respectively. Few studies addressed all of the 5As combined ( $n=12$ , 22%). These reported  
28  
29 that HPs rarely addressed all of the 5As, e.g. only 19.6% of respondents in Bar-Zeev et al's  
30  
31 study of GPs and OBS performed all of the 5As 'often/always'.<sup>91</sup>  
32  
33

34  
35 Only four studies (7%) addressed the provision of other BCTs in pregnancy. In one study,  
36  
37 31% of OBS advised women to set a quit date;<sup>39</sup> in a second study 29% of midwives  
38  
39 suggesting quitting with an acquaintance;<sup>52</sup> 97% of women in a third sample reported they  
40  
41 had not had their exhaled carbon monoxide tested,<sup>56</sup> and a fourth study reported which clinics  
42  
43 used open-ended questions and problem solving.<sup>89</sup> Additionally, some studies ( $n=12$ , 22%),  
44  
45 obtained information on or addressed a woman's psychosocial context for smoking e.g.,  
46  
47 family or partner's smoking status or involvement in quitting, a woman's social support, or  
48  
49 her living environment e.g., a smoke free home or vehicle ( $n=3$ , 6%). Information regarding  
50  
51 the use of resources was addressed in 20 studies (37%), i.e., providing pamphlets or  
52  
53 recommending online programs. Advise about relapse was rarely addressed in the included  
54  
55 literature ( $n=3$ , 6%); e.g. in one of the studies midwives reported they discussed with women  
56  
57 how to avoid relapse.<sup>52</sup>  
58  
59  
60

1  
2  
3 Twenty-nine papers of the 54 papers addressed NRT in some capacity. These included  
4 knowledge and training, attitudes to NRT, and prescribing of NRT. Papers addressing  
5 knowledge, attitudes and training in general ( $n=14$ , 26%) also reported on HP knowledge  
6 about whether NRT can be used in pregnancy, and HP confidence about their smoking  
7 cessation knowledge, awareness of smoking cessation guidelines, knowledge about the  
8 consequences of smoking for expectant mothers, and risks to their baby. The majority of HPs  
9 believed maternal smoking to be harmful to the fetus and/or the woman, with reports ranging  
10 from 90-100%. General knowledge about smoking in pregnancy varied (e.g., in Bonollo et  
11 al,<sup>43</sup> only 44-52% of US HPs of various types, had correct knowledge). In Mejia et al's study  
12 75% of Argentinian physicians believed it was safe to smoke up to six cigarettes when  
13 pregnant.<sup>69</sup>

14  
15 In addition, the above group of studies included aspects of smoking cessation training (i.e.,  
16 whether training had been offered, engaged in, and if more training was needed). In general,  
17 HPs reported they had received limited training on smoking cessation care in pregnancy, and  
18 identified that they required more training.

19  
20 Papers including information on NRT prescribing ( $n=14$ , 26%) reported on the frequency of  
21 considering to prescribe NRT, the frequency of recommendation of NRT, frequency of  
22 prescribing NRT, percentage of NRT scripts filled by women, percentage following FDA  
23 NRT prescription recommendations, and the different NRT types prescribed (e.g., patches,  
24 gum, or inhalators). Overall findings suggested that HPs more often than not chose to not  
25 prescribe NRT to pregnant women who smoke, this was also supported by the meta-analysis  
26 below.

27  
28 Attitudes and knowledge was associated with HP practices. In one Australian study, higher  
29 levels of knowledge about NRT were associated with greater likelihood of assessing  
30  
31  
32  
33  
34  
35  
36  
37  
38  
39  
40  
41  
42  
43  
44  
45  
46  
47  
48  
49  
50  
51  
52  
53  
54  
55  
56  
57  
58  
59  
60

1  
2  
3 women's smoking status.<sup>75</sup> In another US study, OBS who perceived NRT as safe to use in  
4 pregnancy were 20 times more likely to prescribe NRT.<sup>78</sup> An Australian study determined  
5 that HP optimism, and confidence in counselling and/or prescribing NRT, and having  
6 sufficient time and resources were associated with a higher performance of all the 5As.<sup>91</sup>  
7  
8  
9  
10  
11  
12  
13 Thirty-three studies were suitable for meta-analysis.<sup>38,39,42,44,45,48,49,51,52,54-58,60,61,65,66,69,71,74-  
14 76,78,80,81,84,87,90,92</sup> Seventeen meta-analyses were performed and associated forest plots  
15 constructed (see Supplementary File Forest Plot Figures 1 to 17). Figure 2 provides a visual  
16 comparison for pooled percentages of selected categories of 'often/always'.

17  
18  
19  
20  
21  
22  
23  
24  
25 Overall the performance of 'Ask – often/always' ( $n=9$ ) was 91.6% (95% CI 88.2%, 95%).  
26 Percentages for 'Ask – 'always/all'' ( $n=11$ ) was similar at 91.5% (95%CI 85%, 96.3%).  
27 Percentages for 'Ask – Yes' ( $n=4$ , all by women's report) was slightly higher at 93.6%  
28 (95%CI 92.6%, 94.6%).  
29  
30  
31  
32

33  
34  
35  
36 The performance of 'Advise – often/always' ( $n = 7$ ) was 90% overall (95%CI 72.5%,  
37 99.3%). Percentages for 'Advise – always/all' ( $n = 6$ ) was 86.4% overall (95%CI 79.6%,  
38 93.3%). Percentages for 'Advise – Yes' (HP report) ( $n = 4$ ) was much lower at 58.1% overall  
39 (95%CI 55.9%, 60.4%). Percentages for 'Advise – women's report Yes' ( $n = 4$ ) was similar  
40 at 53.6% overall (95%CI 52.6%, 54.6%). Percentages for 'Assess motivation to quit –  
41 often/always' ( $n = 3$ ) was 79.2% overall (95%CI 76.5%, 81.8%).  
42  
43  
44  
45  
46  
47  
48  
49  
50  
51

52 Overall 34 manuscripts included a question about assisting. Some were generally asked about  
53 assisting the patient to quit, others specified a method of assisting such as counselling, setting  
54 a quit date, making a quit plan, and prescribing NRT. Those in the meta-analysis were as  
55 follows: 'Assist cessation support – often/always' ( $n = 5$ ) was 59.1% (95%CI 56%, 62.2%);  
56  
57  
58  
59  
60

1  
2  
3 ‘Assist counselling – yes’ ( $n=5$ ) was higher at 80.7% (95%CI 79%, 82.5%); ‘Assist quit  
4 plan – often/always’ ( $n=2$ ) was 57.6% (95%CI 54.1%, 61.1%); ‘Assist quit date –  
5 often/always’ ( $n=3$ ) was low at 29% (95%CI 25.3%, 32.7%); ‘Assist – women’s report Yes’  
6 ( $n=4$ ) was the lowest at 26.8% (95%CI 25.3%, 28.3%). The performance of ‘Arrange referral  
7 – often/always’ ( $n=6$ ) was 33.3% overall (95%CI 20.4%, 46.2%). There was no analysable  
8 data on women’s report for ‘Arrange’.  
9  
10  
11  
12  
13  
14  
15  
16

17  
18  
19 ‘Prescribing NRT – Yes’ was 25.4% ( $n=6$ ) overall (95%CI 12.8%, 38%). ‘Prescribing NRT –  
20 often/always’ ( $n=4$ ) however was very low at 12.8% overall (95%CI 10.7%, 15%). The  
21 performance of ‘Prescribing NRT – always’ ( $n=4$ ) was the lowest at 6.2% overall (95%CI  
22 4.9%, 7.4%). There was no analysable data on women’s report of having been prescribed  
23 NRT. All of the studies in the meta-analysis for ‘Prescribing NRT – Yes’ were from the  
24 USA (Supplementary File Forest Plot Figure 17).  
25  
26  
27  
28  
29  
30  
31  
32  
33  
34

35 High heterogeneity ( $I^2=95.9-99.1\%$ ) was seen for: ‘Ask – often/always’; ‘Ask – always’;  
36 ‘Advise – often/always’; ‘NRT prescription’; ‘Arrange referral – often/always’; thus  
37 indicating considerable diversity in study outcomes, methodology, or populations. A fixed  
38 effects model was used for the following outcomes due to low number of studies, and  
39 heterogeneity was not measured: ‘Ask – women’s report Yes’; ‘Advise – Yes’; ‘Assess  
40 motivation to quit – often/always’; all the ‘Assist’ categories; ‘NRT Prescription – always’,  
41 ‘NRT Prescription – often/always’.  
42  
43  
44  
45  
46  
47  
48  
49  
50  
51  
52  
53

54 Table 1 displays the results of the meta-regression of the ‘often/always’ categories of ‘Ask’,  
55 ‘Advise’, ‘Arrange’, and ‘Prescribing NRT’ from the meta-analysis. ‘Assist’ only had 5  
56 studies, so the meta-regression was not performed. For nearly all of the measures, none of the  
57  
58  
59  
60

1  
2  
3 predictors examined significantly explained the heterogeneity of the proportions for the  
4  
5 studies. For ‘Arrange referral –often/always’, country was found to explain some of the  
6  
7 differences in proportion of HPs providing this type of smoking cessation care; with  
8  
9 Australian and New Zealand studies having significantly higher proportions of HPs reporting  
10  
11 ‘Arrange referral – often/always’ than USA studies (on average). Year was also found to  
12  
13 explain some of the differences in proportion with later years having higher proportions of  
14  
15 HP reporting this ‘Arrange referral- often or always’ (on average).  
16  
17  
18  
19  
20

21 Table 2 shows the quality rating with the Hawker et al tool,<sup>34</sup> for included studies. Over 70%  
22  
23 of the studies had some aspects at least that were rated as good, and 20 out of 53 (37.7%)  
24  
25 studies that were rated had at least 5 ‘good’ categories out of the 9 available options.  
26  
27 Common flaws were lack of clarity about aims, sampling processes not detailed, ethics  
28  
29 processes not described, and no suggestions made for further research.  
30  
31  
32  
33  
34

35 Table 3 shows the quality ratings of the studies, and level of agreement from using the  
36  
37 Hawker tool,<sup>34</sup> for the 15 papers that were rated independently by two raters. Coder  
38  
39 agreement varied from Poor for two criteria, Fair for four of the criteria, and Moderate for  
40  
41 three criteria.  
42  
43  
44  
45  
46

## 47 **Discussion**

48  
49  
50

51 This systematic review of 54 studies from 10 countries on a range of HPs who consult with  
52  
53 pregnant women who smoke. Thirty-three studies were suitable for meta-analyses for at least  
54  
55 one outcome measure. Studies displayed considerable variation in the way they assessed HP  
56  
57 provision of each of the 5As. Commonly surveys employed Likert scales that were re-  
58  
59  
60

1  
2  
3 categorised as ‘often or always’, or questions forcing a ‘Yes/No’ option. We pragmatically  
4 transformed outcome measures so they could be combined for meta-analysis, over the 5As  
5 and their subcategories, resulting in small numbers of studies in each forest plot, which  
6 means that interpretations should be cautious. We acknowledge that there was no ideal way  
7 to combine these measures. Conceptually, using a scale to quantify responses is quite  
8 different from a ‘yes’ option: the latter may be an option chosen by respondent whether they  
9 perform the practice at an frequency from occasionally to always (ie not at all quantified) –  
10 therefore we did not combine ‘often/always’ with ‘Yes/No’ study measures.  
11  
12  
13  
14  
15  
16  
17  
18  
19  
20  
21  
22  
23

24 The primary aim to determine the prevalence of the components of SCC that were being  
25 practiced by a range of HPs. The review demonstrated several aspects of SCC that could be  
26 improved for pregnant women, including those seen in primary care settings. The highest  
27 rates were for Ask and Advise, and Assess. Assist and Arrange were consistently lower. Our  
28 secondary aim to examine whether SCC differed between different HP types, for pregnant  
29 women in high-risk populations, by country, and by year was achieved by meta-regressions  
30 of studies reporting practices ‘often/always’. Only ‘Arrange referral’ had a significant result,  
31 indicating that year and country could explain some of the heterogeneity, and perhaps  
32 indicating an increased awareness of referral options in later years, or in Australia and New  
33 Zealand. The 21 studies not included in the meta-analysis, revealed few comparable  
34 quantitative studies on HP knowledge, attitudes and the lesser reported practices of BCTs,  
35 and the implementation of all components of the 5As together. On the whole HP knowledge  
36 base might be insufficient about NRT. Poor understanding about the safety or efficacy of  
37 NRT in pregnancy compared to continued smoking may lead to under-prescribing of NRT as  
38 a stop smoking aid, however this is likely to be context sensitive as not all countries  
39 recommend the use of NRT and clinical guidelines vary across time and even within the same  
40  
41  
42  
43  
44  
45  
46  
47  
48  
49  
50  
51  
52  
53  
54  
55  
56  
57  
58  
59  
60

1  
2  
3 country.<sup>17</sup> However, all of the studies in the meta-analysis of NRT were from the USA, and  
4  
5 considerable variation for prescribing NRT is seen within that one country. Access to HP  
6  
7 training for SCC was reported as being limited, and HPs indicated they required more  
8  
9 training.  
10  
11  
12  
13

14 The strength of this study is that, as far as we are aware, it is the broadest and most rigorous  
15  
16 systematic review of HP performance of the 5As in pregnancy, including 7 high-income and  
17  
18 three low to middle income countries and the only review, to our knowledge, to perform a  
19  
20 meta-analysis and meta-regression. We took care to combine outcome measures with like  
21  
22 measures, for each of the 5As, wherever possible. Multiple meta-analyses were performed,  
23  
24 for each combined measure. The high heterogeneity suggests a cautious interpretation of the  
25  
26 results. The review was limited by not being able to determine the cause for the high  
27  
28 heterogeneity in the meta-analyses by our meta-regression, except for 'Arrange referral-  
29  
30 often/always' which was related to year, and country. We recognise that differing clinical  
31  
32 guidelines may have impacted the provision of NRT in pregnancy in some countries. In  
33  
34 particular NRT is not recommended for pregnancy in the USA. Additionally, while most  
35  
36 countries do use the 5As, there are variations, such as ABC (Ask, Brief Advice, Cessation) in  
37  
38 NZ, and Ask, Advise, Action (AAA) in the UK. These have in common the first 2As, and  
39  
40 then a variation to shorten the mnemonic or practice. This variation may be a limitation to  
41  
42 this study.  
43  
44  
45  
46  
47  
48  
49  
50

51 Where the number of studies was low ( $\leq 5$ ), fixed effects modelling was used  
52  
53 because the between-studies variance (tau-squared), and therefore the mean of the underlying  
54  
55 random distribution cannot be estimated with precision; heterogeneity is also not presented in  
56  
57 these cases. We suggest these results are interpreted with caution, and consideration be given  
58  
59  
60



1  
2  
3 to the degree of overlap in the study specific confidence intervals. The quality rating revealed  
4 aspects of some papers were poor; findings from these studies may be less reliable. However  
5  
6 unresolved discrepancies between the raters indicate a circumspect interpretation.  
7  
8  
9

10  
11  
12 Two other reviews examined the provision by HP of SCC for pregnant women. Okoli et al's  
13 non-systematic review included 28 studies from 6 high-income countries (USA, Australia,  
14 UK, Germany, Canada, and the Netherlands).<sup>27</sup> The review reported that few HPs working  
15 with pregnant women use all the components of the 5As. Although more than 50% of HPs in  
16 the review asked women about their smoking status and advised pregnant smokers to quit,  
17 fewer than 50% assessed motivation, assisted smoking cessation, or arranged follow-up or  
18 referrals. Our review highlighted the diversity of the ways different studies surveyed HPs  
19 about their use of the 5As, but it is unclear from the Okoli review how these estimates were  
20 made. Instead a range was reported for each of the 5As, (for example 'Ask' 73-100%;  
21 'Assess' readiness or willingness to make a quit attempt 42-81%) without the reader being  
22 able to determine which studies used Likert scales, if measures were re-categorised, or a  
23 dichotomous Yes/No employed. Baxter et al's systematic review included 23 papers from 6  
24 high-income countries, one middle-income country (UK, France, Sweden, USA, Australia,  
25 NZ, South Africa) and one multi-nation study, in a qualitative synthesis.<sup>28</sup> Similarly, although  
26 Baxter's review reports percentages of HP or women giving or receiving different aspects of  
27 the 5As, they do not describe how these questions were asked.<sup>28</sup>  
28  
29  
30  
31  
32  
33  
34  
35  
36  
37  
38  
39  
40  
41  
42  
43  
44  
45  
46  
47  
48

49 The low rates of reported implementation of components of the 5As may be related to  
50 barriers at several levels. Okoli et al's review suggests several important provider-specific,  
51 patient-specific, and system or organizational barriers hindering the provision of SCC by  
52 HP.<sup>27</sup> Provider-specific barriers centred around HP self-efficacy or perceived ability to  
53 provide SCC to pregnant smokers, namely low knowledge, low confidence for counselling  
54  
55  
56  
57  
58  
59  
60

1  
2  
3 and use of NRT, the perception that as HPs they could not influence the patient's smoking  
4  
5 behaviour, or that SCC was not their role. In the studies in our review, HP practices also  
6  
7 related to HP knowledge and attitudes (optimism and confidence). Patient-level barriers  
8  
9 included HP perceptions that pregnant smokers were not interested in quitting, had stressful  
10  
11 lives, and HPs not wanting to jeopardise their relationship with the pregnant patient by  
12  
13 raising smoking as an issue. System-level barriers included lack of time, resources, training  
14  
15 and protocols, similarly described in our review. Baxter et al's review also reports barriers to  
16  
17 providing SCC: discussing smoking cessation depended on whether HPs were able to broach  
18  
19 the subject, staff confidence and perception of effectiveness, manner of communication,  
20  
21 whether follow-up occurred, time and resource constraints, and service protocols.<sup>28</sup>  
22  
23  
24  
25  
26  
27

28  
29 One of the included Australian studies explained some of the factors that may impinge on the  
30  
31 quality of SCC for pregnant women. Bar-Zeev et al analysed the factors associated with  
32  
33 performance of the 5As, and provision of NRT in Australian medical practitioners.<sup>91</sup> In a  
34  
35 national study of 378 GPs and OBS, 'internal influences' (including HP confidence for  
36  
37 counselling and prescribing NRT, optimism, sufficient time and resources) were associated  
38  
39 with a higher likelihood of performing the 5As, whereas 'external influences' (i.e., workplace  
40  
41 routines, doctor-patient relationship, comfort raising the issue, perceived priority) were  
42  
43 associated with performing the shorter version of Ask, Advise, Refer (AAR).<sup>91,93,94</sup>  
44  
45  
46 Furthermore, being an OBS compared to being a GP, low confidence, and uncertainty about  
47  
48 safety of NRT, were associated with lower odds of prescribing NRT.<sup>92</sup>  
49  
50  
51  
52

53  
54 Our objective to determine which aspects of SCC for pregnant women could need  
55  
56 improvement, revealed on the whole that 'Assist' and Arrange' were less performed.  
57

58  
59 Assisting pregnant smokers to quit is a vital priority. Unless there are high-quality specialised  
60

1  
2  
3 services to refer pregnant smokers to, it is insufficient for HPs to raise the issue, advise, and  
4 assess, without going further to actually assist a quit attempt, and as a duty of care arrange  
5 follow up or referral. Psychosocial support coupled with NRT (if needed, available and  
6 approved) may give pregnant women the best chance of quitting.<sup>17,95</sup> Various implementation  
7 strategies could be considered to improve SCC delivery to pregnant women, which may  
8 include HP education and training, promotion of clinical practice guidelines, audit and  
9 feedback, reminders, opinion leaders, incentives, or supervision.<sup>96</sup> Training was reported as  
10 an educational need by the HPs in the studies, and worthy of consideration. Training should  
11 most urgently focus on the elements of the 5As that are seldom performed, taking into  
12 account country-specific needs and guidelines. Training should provide actual skills to HPs in  
13 how to assist smokers to quit, and give opportunities to practice and receive feedback on their  
14 performance. Evidence-based updates on the use of NRT in pregnancy may be warranted  
15 especially if professional college guidelines are not up-to-date, with a caution about  
16 jurisdictions that may deter prescribing or access.<sup>17</sup>

17  
18  
19 Providing access to resources, such as educational and training materials for HPs, evidence-  
20 based and culturally-appropriate patient information sources, and affordable NRT, will  
21 demand changes to policy in some settings and countries. Time is a perennial problem for  
22 HPs, however changes in practice protocols, and a whole-of-service approach, could support  
23 pregnant women to receive the time investment warranted by such an important issue for  
24 their own and their baby's health. Additionally, policy changes to provide accessible and  
25 culturally-appropriate referral options are critical. Further research is warranted to understand  
26 which interventions can successfully improve HP performance of the 5As, and whether other  
27 models, such as the AAR,<sup>96</sup> the ABC (Ask, Brief Advice, Cessation),<sup>97</sup> or ABCD (Ask, Brief  
28 Advice, Cessation, Discuss)<sup>98</sup> approach may better facilitate HP implementation of SCC, and  
29  
30  
31  
32  
33  
34  
35  
36  
37  
38  
39  
40  
41  
42  
43  
44  
45  
46  
47  
48  
49  
50  
51  
52  
53  
54  
55  
56  
57  
58  
59  
60

1  
2  
3 correspondingly improve quit rates in pregnant women. Standardised methods to assess the  
4 provision of SCC and the 5As in research or program evaluations, would aid future  
5  
6 comparisons.  
7  
8  
9

## 10 11 12 **Conclusions**

13  
14  
15  
16  
17 In a systematic review of HPs' provision of SCC for pregnant women in 10 countries, meta-  
18 analyses were performed after combining like measures across studies where feasible. Pooled  
19 percentages revealed that HPs reliably 'Ask', 'Advise' and 'Assess' pregnant women about  
20 tobacco smoking. 'Assist', including assist by 'prescribing NRT', and 'Arrange referral' were  
21 much lower, and may be improved by appropriate interventions such as training, incentives  
22 or prompts. Meta-regressions were significant only for 'Arrange referral' for year and  
23 country. Further research may be required to understand other factors driving the  
24 heterogeneity between different studies. Standardised methods to assess the provision of SCC  
25 and the 5As are warranted.  
26  
27  
28  
29  
30  
31  
32  
33  
34  
35  
36  
37  
38  
39

40 Author Statement: GSG was responsible for the design of the review, publishing the protocol  
41 in PROSPERO, oversaw all aspects of the study and wrote the manuscript. LT conducted the  
42 searches with YB. LS did the data extraction, and with YB the quality analysis. KP  
43 conducted the meta-analyses and meta-regressions. GRG assisted GSG in writing the  
44 methods and results sections, and preparing tables. BB advised on study design and critically  
45 reviewed the manuscript. YBZ advised on manuscript drafts as senior author. All authors  
46 reviewed and approved the final manuscript.  
47  
48  
49  
50  
51  
52  
53  
54  
55  
56  
57

58 Declaration of interests  
59  
60

1  
2  
3 GSG reports grants from National Health and Medical Research Council, grants from Cancer  
4  
5 Institute New South Wales, grants from Hunter Cancer Research Alliance, during the  
6  
7 conduct of the study; grants from National Health and Medical Research Council, grants  
8  
9 from Hunter New England Central Coast Primary Health Network, grants from Cancer  
10  
11 Australia and Cure Cancer Australia , grants from Ministry of Health NSW , grants from  
12  
13 John Hunter Hospital Charitable Trust, outside the submitted work. YB reports grants and  
14  
15 others from Hunter Cancer Research Alliance, during the conduct of the study; personal fees  
16  
17 from Novartis NCH, personal fees from Pfizer Israel LTD, outside the submitted work. No  
18  
19 other authors declare a conflict of interest.  
20  
21  
22  
23  
24  
25

26 Data Statement: All data relevant to the study are included in the article or uploaded as  
27  
28 supplementary information  
29  
30  
31  
32

33 Acknowledgements: This study was funded by a grant from Hunter Cancer Research  
34  
35 Alliance, Australia. The funder of the study had no role in study design, data collection, data  
36  
37 analysis, data interpretation, or writing of the report. The corresponding author had full  
38  
39 access to all the data in the study and had final responsibility for the decision to submit for  
40  
41 publication.  
42  
43  
44  
45  
46  
47  
48  
49  
50  
51  
52  
53  
54  
55  
56  
57  
58  
59  
60

## References

1. Hofhuis W, De Jongste J, Merkus P. Adverse health effects of prenatal and postnatal tobacco smoke exposure on children. *Archives of disease in childhood* 2003; **88**(12): 1086-90.
2. U.S. Department of Health and Human Services. The Health Consequences of Smoking—50 Years of Progress: A Report of the Surgeon General. Rockville, MD: Public Health Service Office of the Surgeon General; 2014.
3. Cornelius MD, Leech SL, Goldschmidt L, Day NL. Prenatal tobacco exposure: is it a risk factor for early tobacco experimentation? *Nicotine Tob Res* 2000; **2**(1): 45-52.
4. Lange S, Probst C, Rehm J, Popova S. National, regional, and global prevalence of smoking during pregnancy in the general population: a systematic review and meta-analysis. *The Lancet Global Health* 2018.
5. McBride CM, Emmons KM, Lipkus IM. Understanding the potential of teachable moments: the case of smoking cessation. *Health education research* 2003; **18**(2): 156-70.
6. Schneider S, Huy C, Schuetz J. Smoking cessation during pregnancy: a systematic literature review. *Drug and Alcohol Review* 2010; **29**(1): 81-90.
7. Gould GS, Patten C, Glover M, Kira A, Jayasinghe H. Smoking in Pregnancy Among Indigenous Women in High-Income Countries: A Narrative Review. *Nicotine & Tobacco Research* 2017; **19**(5): 506-17.
8. Bottorf JL, Poole N, Kelly MT, Greaves L, Marcellus L, Jung M. Tobacco and alcohol use in the context of adolescent pregnancy and postpartum: a scoping review of the literature. *Health & Social Care in the Community* 2014; **22**(6): 561-74.
9. Rhodes-Keefe JM. Depression and smoking in the pregnant rural population: A Literature Review. *Online Journal of Rural Nursing & Health Care* 2015; **15**(1): 60-73.
10. Flemming K, Graham H, Heirs M, Fox D, Sowden A. Smoking in pregnancy: a systematic review of qualitative research of women who commence pregnancy as smokers. *Journal of Advance Nursing* 2013; **69**(5): 1023-36.
11. Flemming K, McCaughan D, Angus K, Graham H. Qualitative systematic review: barriers and facilitators to smoking cessation experienced by women in pregnancy and following childbirth. *Journal of Advanced Nursing* 2014.
12. Crane CA, Hawes SW, Weinberger AH. Intimate partner violence victimization and cigarette smoking: a meta-analytic review. *Trauma Violence & Abuse* 2013; **14**(4): 305-15.
13. Gould GS, Bovill M, Clarke MJ, Gruppetta M, Cadet-James Y, Bonevski B. Chronological narratives from smoking initiation through to pregnancy of Indigenous Australian women: a qualitative study *Midwifery* 2017; **52**: 27-33.
14. Graham H, Flemming K, Fox D, Heirs M, Sowden A. Cutting down: insights from qualitative studies of smoking in pregnancy. *Health & Social Care in the Community* 2013; **22**(3): 259-67.
15. Ingall G, Cropley M. Exploring the barriers of quitting smoking during pregnancy: A systematic review of qualitative studies. *Women and Birth* 2010; **23**(2): 45-52.
16. Bovill M, Gruppetta M, Cadet-James Y, Clarke M, Bonevski B, Gould GS. Wula (Voices) of Aboriginal women on barriers to accepting smoking cessation support during pregnancy: Findings from a qualitative study. *Women and Birth* 2017.
17. Bar-Zeev Y, Lim LL, Bonevski B, Gruppetta M, Gould GS. Nicotine replacement therapy for smoking cessation in pregnancy. *Med J Aust* 2018; **208**(1): 1.
18. Stead LF, Lancaster T. Combined pharmacotherapy and behavioural interventions for smoking cessation. *Cochrane Database of Systematic Reviews* 2012, Issue 10 Art No: CD008286 2012.
19. Gould GS, Lim LL, Mattes J. Prevention and Treatment of Smoking and Tobacco Use During Pregnancy in Selected Indigenous Communities in High-Income Countries of the United States, Canada, Australia, and New Zealand. *CHEST* 2017; **152**(4): 853-66.



20. American College of Obstetricians and Gynecologists. Committee opinion no. 471: smoking cessation during pregnancy. *Obstet Gynecol* 2010; **116**(1241-1244).
21. Brose LS, McEwen, A. & West, R. Association between nicotine replacement therapy use in pregnancy and smoking cessation *Drug and Alcohol Dependence* 2013; **132**(3): 660-4.
22. NICE. Quitting smoking in pregnancy and following childbirth - NICE public health guidance 26. Manchester National Institute for Health and Clinical Excellence; 2010.
23. Zwar N, Richmond, R, Borland, R, Peters, M, Litt, J, Bell, J, Caldwell, B, Ferretter, I. Supporting smoking cessation: a guide for health professionals Melbourne: The Royal Australian College of General Practitioners; 2011 [Updated July 2014].
24. Ministry of Health. Background and recommendations of the New Zealand guidelines for helping people to stop smoking. . 2014.  
<https://www.health.govt.nz/system/files/documents/publications/backgroundrecommendations-new-zealand-guidelines-for-helpingstop-smoking-mar15-v2.pdf>
25. Canadian Action Network for the Advancement. Dissemination and adoption of practice-informed tobacco treatment. Canadian smoking cessation clinical practice guideline. 2011.  
<https://www.peelregion.ca/health/professionals/events/pdf/2013/canadappt-summary-statements.pdf> (accessed May 2017).
26. Fiore MC BW, Cohen SJ, Dorfman SF, Goldstein MG, Gritz ER, et al,. Smoking Cessation Clinical Practice Guidelines No. 18. Rockville, MD: U.S. Department of Human and Health Services, Public Health Service, Agency for Health Care Policy and Research, 1996.
27. Okoli CTC, Greaves L, Bottorff JL, Marcellus LM. Health care providers' engagement in smoking cessation with pregnant smokers. *JOGNN: Journal of Obstetric, Gynecologic & Neonatal Nursing* 2010; **39**(1): 64-77.
28. Baxter S, Everson-Hock E, Messina J, Guillaume L, Burrows J, Goyder E. Factors relating to the uptake of interventions for smoking cessation among pregnant women: a systematic review and qualitative synthesis. *Nicotine & tobacco research : official journal of the Society for Research on Nicotine and Tobacco* 2010; **12**(7): 685-94.
29. Siddiqi K, Mdege N. A global perspective on smoking during pregnancy. *The Lancet Global Health* 2018.
30. Michie S, Wood C, Johnston M, Abraham C, Francis J, Hardeman W. Chapter 1, General introduction. Behaviour change techniques: the development and evaluation of a taxonomic method for reporting and describing behaviour change interventions (a suite of five studies involving consensus methods, randomised controlled trials and analysis of qualitative data) Southampton, UK: NIHR Journals Library; 2015. p. 1-5.
31. Lorenцatto F, West R, Michie S. Specifying evidence-based behavior change techniques to aid smoking cessation in pregnancy. *Nicotine & Tobacco Research* 2012; **14**(9): 1019-26.
32. Campbell KA, Cooper S, Fahy SJ, et al. 'Opt-out' referrals after identifying pregnant smokers using exhaled air carbon monoxide: impact on engagement with smoking cessation support. *Tob Control* 2017; **26**(3): 300-6.
33. Stroup DF, Berlin JA, Morton SC, et al. Meta-analysis of observational studies in epidemiology: a proposal for reporting. Meta-analysis Of Observational Studies in Epidemiology (MOOSE) group. *JAMA* 2000; **283**(15): 2008-12.
34. Hawker S, Payne S, Kerr C, Hardey M, Powell J. Appraising the evidence: reviewing disparate data systematically. *Qualitative health research* 2002; **12**(9): 1284-99.
35. Borenstein M, Hedges LV, Higgins JPT, Rothstein HR. A basic introduction to fixed-effect and random-effects models for meta-analysis. *Res Synth Method* 2010; (1): 97-111.
36. Altman DG. Practical statistics for medical research: CRC press; 1990.
37. Bar-Zeev Y, Bonevski B, Twyman L, et al. Opportunities missed: A Cross-Sectional Survey of the Provision of Smoking Cessation Care to Pregnant Women by Australian General Practitioners and Obstetricians. *Nic & Tob Res* 2017; **19**(5): 636-41.
38. Abatemarco DJ, Steinberg MB, Delnevo DC. Midwives' Knowledge, Perceptions, Beliefs, and Practice Supports Regarding Tobacco Dependence Treatment. *Journal of Midwifery and Women's Health* 2007; **52**(5): 451-7.
39. Amarin ZO. Obstetricians, gynecologists and the anti-smoking campaign: A national survey. *European Journal of Obstetrics Gynecology and Reproductive Biology* 2005; **119**(2): 156-60.

40. Bakker MJ, De Vries H, Mullen PD, Kok G. Predictors of perceiving smoking cessation counselling as a midwife's role: A survey of Dutch midwives. *European journal of public health* 2005; **15**(1): 39-42.
41. Beenstock J, Sniehotta FF, White M, Bell R, Milne EM, Araujo-Soares V. What helps and hinders midwives in engaging with pregnant women about stopping smoking? A cross-sectional survey of perceived implementation difficulties among midwives in the North East of England. *Implementation Science* 2012; **7**: 36.
42. Berrueta M, Morello P, Alemán A, et al. Smoking Patterns and Receipt of Cessation Services Among Pregnant Women in Argentina and Uruguay. *Nicotine & Tobacco Research* 2016; **18**(5): 1116-25.
43. Bonollo DP, Zapka JG, Stoddard AM, Ma Y, Pbert L, Ockene JK. Treating nicotine dependence during pregnancy and postpartum: understanding clinician knowledge and performance. *Patient Education & Counseling* 2002; **48**(3): 265-74.
44. Bull L, Whitehead E. Smoking cessation intervention with pregnant women and new parents: a survey of health visitors, midwives and practice nurses. *Journal of Neonatal Nursing* 2006; **12**(6): 209-15.
45. Castrucci BC, Culhane JF, Chung EK, Bennett I, McCollum KF. Smoking in pregnancy: patient and provider risk reduction behavior. *Journal of Public Health Management & Practice* 2006; **12**(1): 68-76.
46. Chang JC, Dado D, Frankel RM, et al. When pregnant patients disclose substance use: missed opportunities for behavioral change counseling. *Patient education and counseling* 2008; **72**(3): 394-401.
47. Chang JC, Alexander SC, Holland CL, et al. Smoking is bad for babies: obstetric care providers' use of best practice smoking cessation counseling techniques. *American journal of health promotion : AJHP* 2013; **27**(3): 170-6.
48. Clasper P, White M. Smoking cessation interventions in pregnancy: practice and views of midwives, GPs and obstetricians. *Health Education Journal* 1995; **54**(2): 150-62.
49. Coleman-Cowger VH, Anderson BL, Mahoney J, Schulkin J. Smoking cessation during pregnancy and postpartum: Practice patterns among obstetrician-gynecologists. *Journal of Addiction Medicine* 2014; **8**(1): 14-24.
50. Condliffe L, McEwen A, West R. The attitude of maternity staff to, and smoking cessation interventions with, childbearing women in London. *Midwifery* 2005; **21**(3): 233-40.
51. Cooke M, Mattick RP, Barclay L. Predictors of brief smoking intervention in a midwifery setting. *Addiction* 1996; **91**(11): 1715-25.
52. Eiser J, Main N, Lee A, Hajek P. Midwife attitudes and advice to pregnant smokers. *Addiction Research* 1999; **7**(4): 355-68.
53. England LJ, Anderson BL, Tong VT, et al. Screening practices and attitudes of obstetrician-gynecologists toward new and emerging tobacco products. *American journal of obstetrics and gynecology* 2014; **211**(6): 695.e1-7.
54. Floyd RL, Belodoff B, Sidhu J, Schulkin J, Ebrahim SH, Sokol RJ. A survey of obstetrician-gynecologists on their patients' use of tobacco and other drugs during pregnancy. *Prenatal and Neonatal Medicine* 2001; **6**(4): 201-7.
55. Glover M, Paynter J, Bullen C, Kristensen K. Supporting pregnant women to quit smoking: Postal survey of New Zealand general practitioners and midwives' smoking cessation knowledge and practices. *New Zealand Medical Journal* 2008; **121**(1270): 53-64.
56. Grange G, Vayssiere C, Borgne A, et al. Characteristics of tobacco withdrawal in pregnant women. *European Journal of Obstetrics, Gynecology, & Reproductive Biology* 2006; **125**(1): 38-43.
57. Grimley DM, Bellis JM, Raczynski JM, Henning K. Smoking cessation counseling practices: a survey of Alabama obstetrician-gynecologists. *South Med J* 2001; **94**(3): 297-303.
58. Hartmann KE, Wechter ME, Payne P, Salisbury K, Jackson RD, Melvin CL. Best practice smoking cessation intervention and resource needs of prenatal care providers. *Obstetrics and Gynecology* 2007; **110**(4): 765-70.
59. Helwig AL, Swain GR, Gottlieb M. Smoking cessation intervention: the practices of maternity care providers. *The Journal of the American Board of Family Practice / American Board of Family Practice* 1998; **11**(5): 336-40.



- 1  
2  
3 60. Herbert R, Coleman T, Britton J. U.K. general practitioners' beliefs, attitudes, and reported  
4 prescribing of nicotine replacement therapy in pregnancy. *Nicotine and Tobacco Research* 2005; **7**(4):  
5 541-6.
- 6 61. Hickner J, Cousineau A, Messimer S. Smoking cessation during pregnancy: strategies used  
7 by Michigan family physicians. *The Journal of the American Board of Family Practice / American*  
8 *Board of Family Practice* 1990; **3**(1): 39-42.
- 9 62. Hoekzema L, Werumeus Buning A, Bonevski B, et al. Smoking rates and smoking cessation  
10 preferences of pregnant women attending antenatal clinics of two large Australian maternity hospitals.  
11 *The Australian & New Zealand journal of obstetrics & gynaecology* 2014; **54**(1): 53-8.
- 12 63. Howard L, Rowe M, Bewley S, Marteau T, Demilew J. Smoking cessation in pregnant  
13 women with mental disorders: A cohort and nested qualitative study. *European Psychiatry* 2013; **28**.
- 14 64. Jones D. Changing practice. Exploring the value of smoking cessation advice. *British Journal*  
15 *of Midwifery* 2003; **11**(4): 212-5.
- 16 65. Jordan TR, Dake JA, Price JH. Best practice for smoking cessation in pregnancy: Do  
17 obstetrician/gynecologists use them in practice? *Journal of Women's Health* 2006; **15**(4): 400-11.
- 18 66. Lemola S, Meyer-Leu Y, Samochowiec J. Control Beliefs Are Related to Smoking  
19 Prevention in Prenatal Care. *Inside Childbirth Education* 2012: 7-.
- 20 67. Mabbutt J, Bauman A, Moshin M. Tobacco use of pregnant women and their male partners  
21 who attend antenatal classes: What happened to routine quit smoking advice in pregnancy? *Australian*  
22 *and New Zealand journal of public health* 2002; **26**(6): 571-2.
- 23 68. McEwen A, West R, Mitchell S, Ussher M. Problems identifying pregnant smokers. *British*  
24 *Journal of Midwifery* 2003; **11**(11): 648-.
- 25 69. Mejia R, Martinez VG, Gregorich SE, Perez-Stable EJ. Physician counseling of pregnant  
26 women about active and secondhand smoking in Argentina. *Acta Obstet Gynecol Scand* 2010; **89**(4):  
27 490-5.
- 28 70. Moran S, Thorndike AN, Armstrong K, Rigotti NA. Physicians' missed opportunities to  
29 address tobacco use during prenatal care. *Nicotine and Tobacco Research* 2003; **5**(3): 363-8.
- 30 71. Mullen PD, Pollak KI, Titus JP, Sockrider MM, May JG. Prenatal smoking cessation  
31 counselling by Texas obstetricians. *Birth: Issues in Perinatal Care* 1998; **25**(1): 25-31.
- 32 72. Murphy K, Steyn K, Mathews C. The midwife's role in providing smoking cessation  
33 interventions for pregnant women: The views of midwives working with high risk, disadvantaged  
34 women in public sector antenatal services in South Africa. *International Journal of Nursing Studies*  
35 2016; **53**: 228-37.
- 36 73. Oncken CA, Pbert L, Ockene JK, Zapka J, Stoddard A. Nicotine replacement prescription  
37 practices of obstetric and pediatric clinicians. *Obstetrics and Gynecology* 2000; **96**(2): 261-5.
- 38 74. Owen L, McNeill A. The role of health professionals in reducing smoking in pregnancy.  
39 *Contemporary Reviews in Obstetrics and Gynaecology* 1999; **11**(4): 235-8.
- 40 75. Passey ME, D'Este CA, Sanson-Fisher RW. Knowledge, attitudes and other factors associated  
41 with assessment of tobacco smoking among pregnant Aboriginal women by health care providers: a  
42 cross-sectional survey. *BMC public health* 2012; **12**: 165.
- 43 76. Passey ME, Sanson-Fisher RW. Provision of antenatal smoking cessation support: A survey  
44 with pregnant Aboriginal and Torres Strait Islander women. *Nicotine & Tobacco Research* 2015;  
45 **17**(6): 746-9.
- 46 77. Passey ME, Sanson-Fisher RW, Stirling JM. Supporting pregnant Aboriginal and Torres  
47 Strait Islander women to quit smoking: views of antenatal care providers and pregnant indigenous  
48 women. *Maternal and child health journal* 2014; **18**(10): 2293-9.
- 49 78. Price JH, Jordan TR, Dake JA. Obstetricians and gynecologists' perceptions and use of  
50 nicotine replacement therapy. *J Community Health* 2006; **31**(3): 160-75.
- 51 79. Price JH, Jordan TR, Dake JA. Perceptions and Use of Smoking Cessation in Nurse-  
52 Midwives' Practice. *Journal of Midwifery and Women's Health* 2006; **51**(3): 208-15.
- 53 80. Pullon S, Webster M, McLeod D, Benn C, Morgan S. Smoking cessation and nicotine  
54 replacement therapy in current primary maternity care. *Australian family physician* 2004; **33**(1-2): 94-  
55 6.
- 56  
57  
58  
59  
60

- 1  
2  
3 81. Röske K, Hannöver W, Thyrian JR, John U, Hannich HJ. Smoking cessation counselling for  
4 pregnant and postpartum women among midwives, gynaecologists and paediatricians in Germany.  
5 *International journal of environmental research and public health* 2009; **6**(1): 96-107.  
6 82. Solberg LI, Parker ED, Foldes SS, Walker PF. Disparities in tobacco cessation medication  
7 orders and fills among special populations. *Nicotine & tobacco research : official journal of the*  
8 *Society for Research on Nicotine and Tobacco* 2010; **12**(2): 144-51.  
9 83. Tappin DM, MacAskill S, Bauld L, Eadie D, Shipton D, Galbraith L. Smoking prevalence  
10 and smoking cessation services for pregnant women in Scotland. *Substance abuse treatment,*  
11 *prevention, and policy* 2010; **5**: 1.  
12 84. Thyrian JR, Hannover W, Roske K, Scherbarth S, Hapke U, John U. Midwives' attitudes to  
13 counselling women about their smoking behaviour during pregnancy and postpartum. *Midwifery*  
14 2006; **22**(1): 32-9.  
15 85. Tong VT, England LJ, Dietz PM, Asare LA. Smoking patterns and use of cessation  
16 interventions during pregnancy. *American journal of preventive medicine* 2008; **35**(4): 327-33.  
17 86. Tran ST, Rosenberg KD, Carlson NE. Racial/ethnic disparities in the receipt of smoking  
18 cessation interventions during prenatal care. *Maternal and child health journal* 2010; **14**(6): 901-9.  
19 87. Tzelepis F, Daly J, Dowe S, Bourke A, Gillham K, Freund M. Supporting Aboriginal Women  
20 to Quit Smoking: Antenatal and Postnatal Care Providers' Confidence, Attitudes, and Practices.  
21 *Nicotine & Tobacco Research* 2017; **19**(5): 642-6.  
22 88. Walsh RA, Redman S, Brinsmead MW, Arnold B. Smoking cessation in pregnancy: A survey  
23 of the medical and nursing directors of public antenatal clinics in Australia. *Australian and New*  
24 *Zealand Journal of Obstetrics and Gynaecology* 1995; **35**(2): 144-50.  
25 89. Zapka JG, Pbert L, Stoddard AM, Ockene JK, Goins KV, Bonollo D. Smoking cessation  
26 counseling with pregnant and postpartum women: a survey of community health center providers.  
27 *American journal of public health* 2000; **90**(1): 78-84.  
28 90. Cooke M, Mattick RP, Campbell E. The influence of individual and organizational factors on  
29 the reported smoking intervention practices of staff in 20 antenatal clinics. *Drug and Alcohol Review*  
30 1998; **17**(2): 175-85.  
31 91. Bar-Zeev Y, Bonevski B, Twyman L, et al. Opportunities Missed: A Cross-Sectional Survey  
32 of the Provision of Smoking Cessation Care to Pregnant Women by Australian General Practitioners  
33 and Obstetricians. *Nicotine & Tobacco Research* 2017; **19**(5): 636-41.  
34 92. Bar-Zeev Y, Bonevski B, Gruppetta M, et al. Clinician factors associated with prescribing  
35 nicotine replacement therapy in pregnancy: A cross-sectional survey of Australian obstetricians and  
36 general practitioners. *Australian and New Zealand Journal of Obstetrics and Gynaecology* 2017.  
37 93. Vidrine JI, Shete S, Cao Y, et al. Ask-Advise-Connect: a new approach to smoking treatment  
38 delivery in health care settings. *JAMA internal medicine* 2013; **173**(6): 458-64.  
39 94. Crane R. The most addictive drug, the most deadly substance: smoking cessation tactics for  
40 the busy clinician. *Primary Care: Clinics in Office Practice* 2007; **34**(1): 117-35.  
41 95. Chamberlain C, O'Mara-Eves A, Porter J, et al. Psychosocial interventions for supporting  
42 women to stop smoking in pregnancy. *Cochrane Database of Systematic Reviews* 2017, Issue 2 Art  
43 No: CD001055 2017.  
44 96. Cochrane Collaboration. Effective Practice and Organisation of Care (EPOC). 2015.  
45 <https://epoc.cochrane.org/epoc-taxonomy2018>.  
46 97. Ministry of Health. Implementing the ABC approach for smoking cessation: Framework and  
47 work programme. Wellington, New Zealand: Ministry of Health, 2009.  
48 98. Gould GS, Bittoun R, Clarke MJ. A Pragmatic Guide for Smoking Cessation Counselling and  
49 the Initiation of Nicotine Replacement Therapy for Pregnant Aboriginal and Torres Strait Islander  
50 Smokers. *Journal of Smoking Cessation* 2015; **10**: 96-105.  
51  
52  
53  
54  
55  
56  
57  
58  
59  
60

## Figure Legends:

1  
2  
3  
4  
5  
6  
7  
8  
9

**Figure 1: Prisma Flow Chart of included studies**

10  
11  
12  
13  
14  
15  
16  
17  
18  
19  
20  
21  
22

**Figure 2: Comparison of pooled percentages of selected categories of ‘often/always’**

23  
24  
25

**Tables**

26  
27

**Table 1: Meta-regression analysis of HP practices performed ‘often/always’**

| Predictors                  | ASK   | ADVISE | ASSIST | ARRANGE | NRT   |
|-----------------------------|-------|--------|--------|---------|-------|
| <i>N</i> studies            | 9     | 7      | 5***   | 6       | 6     |
| No predictors               |       |        |        |         |       |
| <i>I</i> <sup>2</sup> resid | 96%   | 91.9%  | 72.9%  | 95.9%   | 97%   |
| $\tau^2$                    | 0.008 | 0.0304 | 0.003  | 0.019   | 0.017 |
| Provider type               |       |        |        |         |       |
| p-value                     | 0.18  | 0.487  | 0.134  | 0.898   | 0.304 |
| <i>I</i> <sup>2</sup> resid | 95.6% | 87.7%  |        | 97.4%   | 94.8% |
| $\tau^2$                    | 0.006 | 0.031  |        | 0.029   | 0.013 |
| High risk                   |       |        |        |         |       |
| p-value                     | 0.909 | **     | 0.43   | 0.62    | **    |
| <i>I</i> <sup>2</sup> resid | 96.4% |        |        | 96.7%   |       |
| $\tau^2$                    | 0.009 |        |        | 0.021   |       |
| Country                     |       |        |        |         |       |
| p-value                     | 0.845 | 0.252  | 0.185  | 0.037   | 0.903 |
| <i>I</i> <sup>2</sup> resid | 96.5% | 89.4%  |        | 84.5%   | 97.6% |
| $\tau^2$                    | 0.012 | 0.022  |        | 0.006   | 0.021 |
| Year                        |       |        |        |         |       |
| p-value                     | *     | *      | *      | 0.013   | *     |
| <i>r</i> <sup>2</sup> resid |       |        |        | 73.9%   |       |

\* non-linear, model not performed, \*\* no high risk populations, \*\*\*too few studies, *I*<sup>2</sup> and  $\tau^2$  not available

**Table 2: Quality assessment of 54 included studies**

| <b>Author (year)</b>  | <b>Abstract and title</b> | <b>Intro and aims</b> | <b>Method and data</b> | <b>Sampling</b> | <b>Data analysis</b> | <b>Ethics and bias</b> | <b>Results</b> | <b>Transferability</b> | <b>Implications and usefulness</b> |
|-----------------------|---------------------------|-----------------------|------------------------|-----------------|----------------------|------------------------|----------------|------------------------|------------------------------------|
| Abatemarco (2007)     | Good                      | Good                  | Fair                   | Good            | Fair                 | Fair                   | Poor           | Good                   | Good                               |
| Amarin (2005)         | Poor                      | Fair                  | Poor                   | Poor            | Poor                 | Poor                   | Poor           | Poor                   | Fair                               |
| Bakker (2005)         | Fair                      | Fair                  | Fair                   | Fair            | Fair                 | Poor                   | Fair           | Fair                   | Fair                               |
| Bar Zeev (2017)       | Good                      | Good                  | Good                   | Good            | Fair                 | Fair                   | Good           | Fair                   | Good                               |
| Beenstock (2012)      | Good                      | Good                  | Good                   | Good            | Good                 | Fair                   | Good           | Good                   | Good                               |
| Berruetas (2016)      | Fair                      | fair                  | Fair                   | Good            | Fair                 | Fair                   | Good           | Good                   | Good                               |
| Bonollo (2002)        | Good                      | Good                  | Good                   | Fair            | Good                 | Good                   | Fair           | Fair                   | Fair                               |
| Bull (2006)           | Fair                      | Fair                  | Fair                   | Fair            | Fair                 | Good                   | Good           | Fair                   | Good                               |
| Castrucci (2006)      | Fair                      | Fair                  | Fair                   | Fair            | Fair                 | Very poor              | Fair           | Fair                   | Fair                               |
| Chang (2008)          | Good                      | Good                  | Good                   | Fair            | Fair                 | Good                   | Fair           | Fair                   | Fair                               |
| Chang (2013)          | Fair                      | Good                  | Good                   | Fair            | Good                 | Good                   | Fair           | Fair                   | Good                               |
| Clasper (1995)        | Fair                      | Fair                  | Fair                   | Fair            | Fair                 | Fair                   | Fair           | Fair                   | Fair                               |
| Coleman-Cowger (2014) | Good                      | Fair                  | Good                   | Good            | Fair                 | Very poor              | Fair           | Fair                   | Good                               |
| Condliffe (2005)      | Good                      | Fair                  | Good                   | Fair            | Fair                 | Fair                   | Fair           | Fair                   | Fair                               |
| Cooke (1996)          | Good                      | Fair                  | Fair                   | Good            | Good                 | Fair                   | Good           | Good                   | Good                               |

1  
2  
3  
4  
5  
6  
7  
8  
9  
10  
11  
12  
13  
14  
15  
16  
17  
18  
19  
20  
21  
22  
23  
24  
25  
26  
27  
28  
29  
30  
31  
32  
33  
34  
35  
36  
37  
38  
39  
40  
41  
42  
43  
44  
45  
46  
47  
48  
49  
50  
51  
52  
53  
54  
55  
56  
57  
58  
59  
60

|                 |      |      |      |           |      |      |      |      |      |
|-----------------|------|------|------|-----------|------|------|------|------|------|
| Cooke (1998)    | Fair | Fair | Fair | Fair      | Good | Fair | Fair | Fair | Fair |
| Eiser (1999)    | Fair | Fair | Fair | Fair      | Fair | Poor | Fair | Fair | Fair |
| England (2014)  | Good | Good | Fair | Good      | Good | Good | Good | Good | Good |
| Floyd (2001)    | Fair | Fair | Fair | Poor      | Fair | Fair | Fair | Poor | Fair |
| Glover (2008)   | Fair | Fair | Poor | Fair      | Poor | Fair | Fair | Fair | Fair |
| Grange (2006)   | Poor | Fair | Poor | Fair      | Fair | Poor | Fair | Fair | Fair |
| Grimley (2001)  | Good | Good | Good | Good      | Fair | Good | Good | Fair | Good |
| Hartmann (2007) | Good | Good | Good | Fair      | Fair | Good | Good | Fair | Fair |
| Helwig (1998)   | Good | Fair | Fair | Fair      | Fair | Fair | Fair | Fair | Fair |
| Herbert (2005)  | Fair | Fair | Fair | Fair      | Fair | Fair | Fair | Fair | Fair |
| Hickner (1990)  | Fair | Poor | Fair | Fair      | Fair | Poor | Fair | Fair | Fair |
| Hoekzema (2014) | Good | Good | Good | Good      | Fair | Fair | Good | Good | Fair |
| Howard (2013)   | Good | Good | Good | Good      | Good | Good | Good | Fair | Good |
| Jones (2003)    | Good | Good | Fair | Fair      | Fair | Fair | Fair | Fair | Fair |
| Jordan (2006)   | Fair | Fair | Fair | Fair      | Fair | Poor | Fair | Fair | Good |
| Lemola (2012)   | Good | Good | Good | Good      | Good | Fair | Good | Good | Good |
| Mabbutt (2002)  | Good | Good | Fair | Poor      | Fair | Fair | Good | Poor | Fair |
| McEwen (2003)   | NA   | NA   | NA   | NA        | NA   | NA   | NA   | NA   | NA   |
| Mejia (2010)    | Good | Fair | Fair | Good      | Fair | Poor | Fair | Fair | Good |
| Moran (2003)    | Fair | Good | Good | Good      | Good | Poor | Good | Good | Good |
| Mullen (1998)   | Fair | Good | Fair | Fair      | Good | Poor | Fair | Fair | Fair |
| Murphy (2016)   | Fair | Fair | Fair | Good      | Fair | Good | Fair | Good | Good |
| Oncken (2000)   | Good | Fair | Good | Good      | Good | Poor | Good | Good | Fair |
| Owen (1999)     | Poor | Fair | Poor | Very poor | Poor | Poor | Poor | Fair | Fair |
| Passey (2012)   | Good | Fair | Fair | Fair      | Fair | Fair | Fair | Fair | Good |
| Passey (2015)   | Fair | Fair | Good | Fair      | Fair | Fair | Fair | Fair | Fair |
| Passey (2014)   | Fair | Fair | Fair | Fair      | Good | Fair | Good | Fair | Good |
| Price (2006)    | Good | Fair | Good | Fair      | Good | Poor | Good | Fair | Good |
| Price (2006)    | Good | Fair | Fair | Fair      | Fair | Fair | Fair | Fair | Fair |
| Pullon (2004)   | Fair | Fair | Fair | Fair      | Fair | Poor | Fair | Fair | Fair |
| Roske (2009)    | Good | Good | Fair | Good      | Good | Fair | Good | Good | Fair |
| Solberg (2010)  | Good | Good | Good | Good      | Good | Good | Good | Good | Good |
| Tappin (2010)   | Fair | Fair | Fair | Good      | Poor | Fair | Fair | Fair | Fair |
| Thyrian (2006)  | Good | Good | Good | Good      | Good | Good | Good | Good | Good |
| Tong (2008)     | Good | Good | Fair | Good      | Fair | Poor | Fair | Good | Fair |
| Tran (2010)     | Good | Fair | Good | Good      | Good | Fair | Good | Good | Good |
| Tzelepis (2017) | Good | Fair | Good | Good      | Good | Good | Good | Good | Good |

|              |      |      |      |      |      |      |      |      |      |
|--------------|------|------|------|------|------|------|------|------|------|
| Walsh (1995) | Good | Fair | Good | Fair | Fair | Fair | Good | Fair | Fair |
| Zapka (2000) | Good | Fair | Good | Fair | Good | Fair | Good | Fair | Fair |

NA – not applicable as was a letter to the Editor

**Table 3: Findings from agreement of quality rating analysis of coders using the Hawker tool**

| <i>Study Criteria</i>       | <i>Mean Rating (SD)</i> |                | <i>Agreement</i>               |                  |
|-----------------------------|-------------------------|----------------|--------------------------------|------------------|
|                             | <i>Rater 1</i>          | <i>Rater 2</i> | <i>Weighted kappa (95% CI)</i> | <i>Agreement</i> |
| Abstract and title          | 2.4 (0.6)               | 2.3 (0.6)      | 0.13 (-0.41, 0.68)             | Poor             |
| Intro and aims              | 2.3 (0.5)               | 2.1 (0.3)      | 0.25 (-0.17, 0.67)*            | Fair             |
| Method and data             | 2.2 (0.6)               | 2.3 (0.6)      | -0.15 (-0.74, 0.43)            | Poor             |
| Sampling                    | 2.1 (0.8)               | 2.3 (0.6)      | 0.43 (0.10, 0.76)              | Moderate         |
| Data analysis               | 2.1 (0.6)               | 2.1 (0.5)      | 0.51 (0.03, 0.99)              | Moderate         |
| Ethics and bias             | 1.9 (0.8)               | 1.9 (1.0)      | 0.38 (0.13, 0.63)              | Fair             |
| Results                     | 2.3 (0.7)               | 2.4 (0.5)      | 0.26 (-0.11, 0.62)             | Fair             |
| Transferability             | 2.2 (0.4)               | 2.3 (0.6)      | 0.21 (-0.19, 0.61)             | Fair             |
| Implications and usefulness | 2.4 (0.6)               | 2.5 (0.6)      | 0.58 (0.18, 0.98)              | Moderate         |

\*only 2 levels, therefore Kappa rather than weighted Kappa used

1  
2  
3  
4  
5  
6  
7  
8  
9  
10  
11  
12  
13  
14  
15  
16  
17  
18  
19  
20  
21  
22  
23  
24  
25  
26  
27  
28  
29  
30  
31  
32  
33  
34  
35  
36  
37  
38  
39  
40  
41  
42  
43  
44  
45  
46  
47  
48  
49  
50  
51  
52  
53  
54  
55  
56  
57  
58  
59  
60



Figure 1: Prisma Flow Chart of included studies

1  
2  
3  
4  
5  
6  
7  
8  
9  
10  
11  
12  
13  
14  
15  
16  
17  
18  
19  
20  
21  
22  
23  
24  
25  
26  
27  
28  
29  
30  
31  
32  
33  
34  
35  
36  
37  
38  
39  
40  
41  
42  
43  
44  
45  
46  
47  
48  
49  
50  
51  
52  
53  
54  
55  
56  
57  
58  
59  
60



Figure 2: Comparison of pooled percentatges of selected categories of 'often/always'



Supplementary Table 1: Key search terms for systematic review on Health Providers' Practices for Smoking Cessation Care in Pregnancy

| <b>Health Professional</b> | <b>Attitudes and Practices</b>        | <b>Smoking</b>               | <b>Pregnancy</b>   |
|----------------------------|---------------------------------------|------------------------------|--------------------|
| Allied health personnel    | Health Knowledge, Attitudes, Practice | Tobacco dependence treatment | Maternal behaviour |
| General practitioner       | Attitude of Health Personnel          | Maternal tobacco smoking     | Perinatal Care     |
| Medical practitioner       | Knowledge                             | Smoking Cessation            | Pregnancy          |
| Health Professional        | Perception                            | Tobacco use disorder         | Maternal           |
| Health personnel           | Practice                              | Nicotine dependence          | Mother             |
| Family Practice            | Belief                                | Smoking treatment            | Preg*              |
| Specialist                 | Capacity                              | Smoking                      | Antenatal          |
| Physician                  | Capability                            | Smok*                        |                    |
| Doctor                     | Confidence                            | Tobacco                      |                    |
| Midwife                    | Priority                              |                              |                    |
| Gynaecology                | Barrier                               |                              |                    |
| Obstetrics                 | Attitude                              |                              |                    |
| Clinician                  | Skill                                 |                              |                    |
| Dentist                    | Ability                               |                              |                    |
| Pharmacist                 |                                       |                              |                    |
| Consultant                 |                                       |                              |                    |

*Note:* all search terms were “exploded”, meaning the terms underneath these keywords were also searched for.

1  
2  
3  
4  
5  
6  
7  
8  
9  
10  
11  
12  
13  
14  
15  
16  
17  
18  
19  
20  
21  
22  
23  
24  
25  
26  
27  
28  
29  
30  
31  
32  
33  
34  
35  
36  
37  
38  
39  
40  
41  
42  
43  
44  
45  
46

Supplementary Table 2: Characteristics of included quantitative (N=54) studies

For peer review only

| First Author (year) Country | Study Focus                                      | Population & Risk Category (high/low) | Study Aim(s)                                                                                                                                                                                                                                                             | Ask | Advise | Assess | Assist | Arrange follow up | NRT | Summary of results                                                                                                                                                                                                                                                                                                                                                                                                                                                                                                                                                                                                                                                                      |
|-----------------------------|--------------------------------------------------|---------------------------------------|--------------------------------------------------------------------------------------------------------------------------------------------------------------------------------------------------------------------------------------------------------------------------|-----|--------|--------|--------|-------------------|-----|-----------------------------------------------------------------------------------------------------------------------------------------------------------------------------------------------------------------------------------------------------------------------------------------------------------------------------------------------------------------------------------------------------------------------------------------------------------------------------------------------------------------------------------------------------------------------------------------------------------------------------------------------------------------------------------------|
| Abatemarco (2007) USA       | Health Providers (Midwives)                      | Low risk                              | Determine how New Jersey's certified nurse-midwives (CNMs) provide tobacco screening and cessation counselling to pregnant smoking women.                                                                                                                                | X   | X      | X      | X      | X                 |     | Nearly all midwives routinely ask, advise, and assess; while fewer address quit dates, or discuss medication options (assist) and perform follow-up activities (arrange). Midwives identify a need for training.                                                                                                                                                                                                                                                                                                                                                                                                                                                                        |
| Amarin (2005) Jordan        | Health Providers (Obstetrician & Gynaecologists) | Low risk                              | Establish tobacco use amongst obstetricians/gynaecologists and assess awareness of the impact of smoking on health; routine practices with patients who smoke; opinions of factors contributing to tobacco use and their perceived barriers to counselling improvements. | X   | X      |        | X      |                   |     | A high proportion of obstetricians/gynaecologists are smokers. Most health professionals associated smoking with low birth weight and sudden infant death syndrome. Fewer associated smoking with infertility, ectopic pregnancy, placenta praevia, abruption placenta and cancer of the uterine cervix. Friends, stress, parents' attitude, genetic predisposition, income and education were implicated factors for smoking. Current smokers were more likely to permit smoking in their practices. Non-smokers were most inclined to record their patients' tobacco habits. Only 54.3% provided cessation counselling. Lack of time and inadequate training were perceived barriers. |
| Bakker (2005) Netherlands   | Pregnant Women                                   | Low risk                              | To identify relevant factors that hamper or promote the provision of effective smoking cessation advice and counselling.                                                                                                                                                 |     |        | NA*    |        |                   |     | In general, midwives were motivated to provide their clients with smoking cessation advice, however, were less comfortable guiding women through the cessation process.                                                                                                                                                                                                                                                                                                                                                                                                                                                                                                                 |
| Bar-Zeev (2017) Australia   | Health Providers (GPs & Obstetricians)           | Low risk                              | Examine: 1) Self-reported provision of SCC to pregnant women by GPs and Obstetricians in Australia; 2) Barriers and enablers to SCC and 3) Associations between                                                                                                          | X   | X      | X      | X      | X                 | X   | Almost all clinicians (98%) reported that addressing smoking during pregnancy is a high priority, and that they feel comfortable raising the issue with a pregnant woman (95%). TDF statements receiving the lowest agreement (agree & strongly agree) were having sufficient time (41%), sufficient resources (47.5%) and optimism of intervention effectiveness (35%). Dimension reduction revealed two factors: 1) 'Internal influences' including confidence in counselling, confidence in prescribing NRT, optimism, sufficient time and resources; 2) 'External influences' including high priority, benefit relationship,                                                        |

1  
2  
3  
4  
5  
6  
7  
8  
9  
10  
11  
12  
13  
14  
15  
16  
17  
18  
19  
20  
21  
22  
23  
24  
25  
26  
27  
28  
29  
30  
31  
32  
33  
34  
35  
36  
37  
38  
39  
40  
41  
42  
43  
44  
45  
46

health professionals (GP/Obstetrician), knowledge, attitudes, and performance of SCC."

workplace routine, and comfortable raising the issue. Compared to NFASTIH GPs, being an Obstetrician was associated with lower performance of all the 5A's, but with a higher performance of AAR. No difference was found between the performance of the RANZCOG GPs and Obstetricians. 'Internal influences' were associated with a higher performance of all the 5A's, whereas 'External influences' were associated with a higher performance of AAR. Performing all the required 5A's was done by less than 20% of participants and was associated with barriers that are internal such as low confidence and low optimism. Internal barriers includes confidence in counselling, confidence in prescribing NRT, optimism in intervention effectiveness, sufficient time and resources. External barriers includes high priority, benefit relationship, workplace routine, comfortable raising the issue.

Beenstock (2012) UK Health Providers (Midwives) Low risk Investigate the perceived implementation difficulties of midwives in providing smoking-cessation advice to pregnant smoking women. Investigate relationships between the self-reported behaviour of referring women to smoking-cessation services and demographic and professional variables. NA\*

Midwives were less certain about the consequences of, and the environmental context and resources available for, engaging in this work relative to other TDF domains. The 'propensity to act' was predictive of the self-reported behaviour 'Refer all women who smoke.....to NHS Stop Smoking Services' and mediated the relationship between demographic variables (e.g., midwives' workplace and behaviours). This study supports previous research that the TDF is an appropriate tool to understand the behaviour of healthcare professionals.

Berruetas (2016) Argentina & Uruguay Pregnant Women High Risk-Economically deprived Assess smoking patterns and receipt of 5A's among pregnant women in Buenos Aires, Argentina and Montevideo, Uruguay. X X X X X

Among pregnant smokers in Argentina, 23.8% reported that a provider asked them about smoking at more than one prenatal care visit; 18.5% were advised to quit; 5.3% were assessed for readiness to quit, 4.7% were provided assistance, and 0.7% reported follow-up was arranged. In Uruguay, those percentages were 36.3%, 27.9%, 5.4%, 5.6%, and 0.2%, respectively.

Bonollo (2002) USA Health Providers (Physicians, Nurses, Practitioner, & Nutritionists) Low risk To examine in detail the specific content and levels of knowledge among providers caring for low-income pregnant and postpartum women to present a current perspective on counselling related to tobacco addiction. Explore provider characteristics related to knowledge levels. NA\*

Providers reported low awareness of the health risks of smoking to the developing foetus/child of pregnant and postpartum women and of the effectiveness of nicotine replacement therapy (NRT) for doubling quit rates. Obstetric (OB) and WIC providers were more aware than PED providers that provider-delivered interventions are effective. Confidence in using counselling steps was significantly associated with general and NRT-related knowledge. NRT-related knowledge, but not general knowledge, was associated with higher performance of intervention steps. Educational programs targeting OB, WIC, and PED providers' knowledge about effective smoking cessation counselling strategies and their confidence in being effective with patients are needed.

Bull (2006) UK Health Providers (Health Visitors, Midwives, And Nurses) Low risk To examine the attitudes, knowledge and practice of health visitors, midwives and practice nurses in relation to smoking cessation interventions with X X X X X

All health practitioners claimed to ask if their patients smoked. Most claimed to record smoking status on health records and give cessation advice. Fewer provided advice to partners of women in their care and only a minority had read the NICE clinical guidelines on NRT.

1  
2  
3  
4  
5  
6  
7  
8  
9  
10  
11  
12  
13  
14  
15  
16  
17  
18  
19  
20  
21  
22  
23  
24  
25  
26  
27  
28  
29  
30  
31  
32  
33  
34  
35  
36  
37  
38  
39  
40  
41  
42  
43  
44  
45  
46

pregnant women and new parents.

|    |                           |                                                                                                          |          |                                                                                                                                                                                                                                                                                                  |   |   |   |   |   |   |                                                                                                                                                                                                                                                                                                                                                                                                                                                                                                                     |
|----|---------------------------|----------------------------------------------------------------------------------------------------------|----------|--------------------------------------------------------------------------------------------------------------------------------------------------------------------------------------------------------------------------------------------------------------------------------------------------|---|---|---|---|---|---|---------------------------------------------------------------------------------------------------------------------------------------------------------------------------------------------------------------------------------------------------------------------------------------------------------------------------------------------------------------------------------------------------------------------------------------------------------------------------------------------------------------------|
| 5  | Castrucci (2006) USA      | Pregnant Women                                                                                           | Low risk | Describe the range of risk reduction behaviours among women who continue to smoke after learning of their pregnancy, including reduce tobacco use, eventual cessation and sustained abstinence as well the patient-reported smoking cessation - promoting behaviours of prenatal care providers. | X | X |   |   |   |   | Smoking cessation was achieved by only a quarter of antenatal smokers, almost 90 percent reduced their cigarette consumption. Antenatal smokers reported that prenatal care providers asked about their smoking (90.6%) and advised about quitting (76.5%). However, only 27.9% were given referrals to smoking cessation programs.                                                                                                                                                                                 |
| 15 | Chang (2008) USA          | Pregnant Women & Health Providers (Obstetrics-Gynaecology Resident, Nurse Midwife, & Nurse Practitioner) | Low risk | Examine patient-provider communication about substance use behaviours during obstetric visits.                                                                                                                                                                                                   | X | X | X | X | X |   | Provider responses to smoking disclosures included discussions of risks, encouragement to quit-cut down, affirmation of attempts to quit-cut down, and referral to smoking cessation programs. Providers should discuss behavioural change strategies and motivations with pregnant patients who use substances.                                                                                                                                                                                                    |
| 22 | Chang (2013) USA          | Health Providers (Nurse Midwife, Nurse Practitioner, Residents, Physician Assistant)                     | Low risk | Describe obstetric providers' adherence to the evidence-based clinical practice guideline for smoking cessation counselling, the 5 A's (Ask, Advice, Assess, Assist, and Arrange).                                                                                                               | X | X | X | X | X | X | Obstetric providers frequently asked about smoking (98%) however, used 3 or more of the 5 A's in only 21% (24) of visits. In no visits did providers use all 5 A's.                                                                                                                                                                                                                                                                                                                                                 |
| 29 | Clasper (1995) UK         | Health Providers (Hospital Midwives, Community Midwives, General Practitioners, Obstetricians)           | Low risk | To inform the development of future smoking cessation interventions in pregnancy by measuring current practice and the associated attitudes and beliefs of the main professionals responsible for the delivery of antenatal care.                                                                | X | X |   | X | X |   | Most professionals asked about the smoking status of pregnant women, record smoking status and explain the risks of smoking while pregnant. Fewer professionals gave pregnant smokers advice on how to stop or monitored at and reviewed smoking status throughout pregnancy. Most experienced difficulty and a lack of enjoyment while giving smoking cessation counselling. Over half (53%) perceived themselves to be insufficiently trained, whilst few (28%) thought that they possessed the necessary skills. |
| 36 | Coleman-Cowger (2014) USA | Health Providers (Obstetrician & Gynaecologists)                                                         | Low risk | To assess current ob-gyn practice patterns related to the management of and barriers to smoking                                                                                                                                                                                                  | X | X | X | X | X | X | Ob-gyns estimated that approximated that 32% of pregnant smokers quit during pregnancy, but 50% return to smoking postpartum. The primary barrier was time limitations. Compared with findings from a similar study conducted in 1998, physicians are less likely to adhere to the 5 As smoking cessation guideline at present.                                                                                                                                                                                     |

1  
2  
3  
4  
5  
6  
7  
8  
9  
10  
11  
12  
13  
14  
15  
16  
17  
18  
19  
20  
21  
22  
23  
24  
25  
26  
27  
28  
29  
30  
31  
32  
33  
34  
35  
36  
37  
38  
39  
40  
41  
42  
43  
44  
45  
46

cessation during pregnancy and postpartum.

|                        |                                                                                       |          |                                                                                                                                                                                                                                             |   |   |   |     |                                                                                                                                                                                                                                                                                                                                                                                                                                                                                                                                                                                                                                                                                                                                                                                                                                                        |
|------------------------|---------------------------------------------------------------------------------------|----------|---------------------------------------------------------------------------------------------------------------------------------------------------------------------------------------------------------------------------------------------|---|---|---|-----|--------------------------------------------------------------------------------------------------------------------------------------------------------------------------------------------------------------------------------------------------------------------------------------------------------------------------------------------------------------------------------------------------------------------------------------------------------------------------------------------------------------------------------------------------------------------------------------------------------------------------------------------------------------------------------------------------------------------------------------------------------------------------------------------------------------------------------------------------------|
| Condliffe (2005) USA   | Health Providers (Midwives Grandes E-H, Health Care Assistants)                       | Low risk | Explore the self-reported smoking-cessation interventions of maternity staff with pregnant smokers and their attitudes towards smoking in pregnancy.                                                                                        | X | X |   | X   | Over two-thirds of respondents (71%) reported not advising any pregnant women to give up smoking within the previous 7 days. However, 64% felt women should not make up their own minds about whether to smoke during pregnancy, and 81% agreed/strongly agreed that many pregnant women would like to give up smoking but need help and advice on how to succeed. Helping a pregnant woman to give up smoking was seen as being one of the most important things a midwife can do by 73% of the respondents. Although the reported attitudes were supportive of the midwife's role in smoking cessation, they did not translate into practice. The level of smoking cessation interventions was low.                                                                                                                                                  |
| Cooke (1996) Australia | Health Providers (Midwives)                                                           | Low risk | Assess current practice in smoking cessation interventions by midwives and to examine the relationship between the use of smoking interventions, practitioner's characteristics, and organisational factors.                                | X | X |   | X X | Most midwives used minimal interventions (advice and education) for at least some of their clients. The more skilled and more time-intensive forms of intervention (e.g., counselling, negotiating a quit date, and follow-up) were infrequently utilized. Participants estimated that half their smoking clients were not offered advice about smoking. Organizational factors such as: hospital policy for smoking intervention, type of hospital, size of hospital, cohesion of staff and work pressure predicted the use of smoking interventions. Self-reported ability to intervene for smoking and the level of assessment undertaken were practitioner characteristics which predicted the use of smoking interventions. The barriers that inhibit the use of smoking intervention by midwives are discussed and methods for change canvassed. |
| Cooke (1998) Australia | Health Providers (Midwives, Doctors: Obstetric Specialists, Registrars and Residents) | Low risk | The aims of the study were to describe the smoking intervention practice of antenatal clinic staff, and to ascertain the organizational and practitioner variables which predict clinician use of smoking interventions.                    | X | X |   | X X | Most antenatal clinic staff did not use the most effective forms of brief interventions for smoking. The presence of specific procedures and training in smoking cessation intervention appeared to be the most important predictors of reported smoking intervention in hospital antenatal clinics.                                                                                                                                                                                                                                                                                                                                                                                                                                                                                                                                                   |
| Eiser (1999) UK        | Health Providers (Midwives)                                                           | Low risk | Assess a) their attitudes to giving anti-smoking advice to pregnant smokers and whether they perceived this as part of their professional role and b) the types of advice they gave to pregnant smokers as part of their routine practices. | X | X | X | X   | Midwives attitudes towards giving anti-smoking advice were generally positive, and almost all reported routinely explaining the health dangers of smoking to pregnant smokers. Among midwives who had never smoked, those who held role attitudes that were more favourable towards anti-smoking intervention reported providing relatively more advice based on warnings of health consequences and an emphasis on abstinence. Among the remainder of the sample, more favourable attitudes predicted greater use of behaviourally-oriented advice to facilitate cessation or smoking reduction, but were unrelated to the use of health warnings and emphasis on abstinence.                                                                                                                                                                         |
| England (2014) USA     | Health Providers (Obstetrician-Gynaecologist Physicians)                              | Low risk | Examine screening practices and attitudes of obstetricians-gynaecologists toward new and emerging tobacco products.                                                                                                                         |   |   |   | NA* | A substantial proportion of obstetrician-gynaecologists reported never or inconsistently screening their pregnant patients for the use of non-combustible tobacco products. Responses regarding the harms of these products relative to cigarettes were mixed and most respondents wanted more information.                                                                                                                                                                                                                                                                                                                                                                                                                                                                                                                                            |

|    |          |                   |          |                                                                                                                         |   |   |   |   |   |   |                                                                                              |
|----|----------|-------------------|----------|-------------------------------------------------------------------------------------------------------------------------|---|---|---|---|---|---|----------------------------------------------------------------------------------------------|
| 1  |          |                   |          |                                                                                                                         |   |   |   |   |   |   |                                                                                              |
| 2  |          |                   |          |                                                                                                                         |   |   |   |   |   |   |                                                                                              |
| 3  | Floyd    | Health Providers  | Low risk | Assess the knowledge,                                                                                                   | X | X |   | X | X | X | While screening of prenatal patients for tobacco use and other drug use was reported by      |
| 4  | (2001)   | (Obstetric-       |          | beliefs and practice                                                                                                    |   |   |   |   |   |   | survey respondents, providing or arranging for interventions for those screening positives   |
| 5  | USA      | Gynaecologists)   |          | behaviours of obstetricians/<br>gynaecologists concerning<br>their patients prenatal use<br>of tobacco and other drugs. |   |   |   |   |   |   | was less often reported.                                                                     |
| 6  |          |                   |          |                                                                                                                         |   |   |   |   |   |   |                                                                                              |
| 7  |          |                   |          |                                                                                                                         |   |   |   |   |   |   |                                                                                              |
| 8  | Glover   | Health Providers  | Low risk | To examine New Zealand                                                                                                  | X | X | X | X | X | X | GPs are in the ideal position to offer stop-smoking advice, because they usually confirm     |
| 9  | (2008)   | (GPs,             |          | general practitioners' GP                                                                                               |   |   |   |   |   |   | pregnancy. GPs are most likely to advocate stopping smoking completely; midwives are         |
| 10 | NZ       | Registered        |          | and midwives' smoking                                                                                                   |   |   |   |   |   |   | more likely to advocate cutting down with a view to quitting. Both GPs and midwives          |
| 11 |          | Midwives)         |          | cessation knowledge and                                                                                                 |   |   |   |   |   |   | would benefit from improved knowledge of the full range of nicotine replacement therapy      |
| 12 |          |                   |          | support offered to pregnant                                                                                             |   |   |   |   |   |   | (NRT).                                                                                       |
| 13 | Grange   | Pregnant          | Low risk | To describe the                                                                                                         | X | X | X | X |   |   | Healthcare professionals seems to offer only rudimentary care. Simple strategies to help     |
| 14 | (2006)   | Women             |          | management of tobacco                                                                                                   |   |   |   |   |   |   | women give up smoking are required. The partner is an important target, especially if he     |
| 15 | France   |                   |          | withdrawal in pregnant                                                                                                  |   |   |   |   |   |   | can be persuaded to give up at the same time.                                                |
| 16 | Grimley  | Health Providers  | Low risk | To determine the adherence                                                                                              | X | X | X | X | X | X | Interventions are needed to motivate, support, and guide OB-GYN physicians to assist         |
| 17 | (2001)   | (Obstetrician &   |          | to the clinical guidelines for                                                                                          |   |   |   |   |   |   | and follow-up with their pregnant patients who smoke.                                        |
| 18 | USA      | Gynaecologists)   |          | smoking cessation among                                                                                                 |   |   |   |   |   |   |                                                                                              |
| 19 |          |                   |          | Ob-gyn physicians within                                                                                                |   |   |   |   |   |   |                                                                                              |
| 20 | Hartmann | Health Providers  | Low risk | To measure the use of best                                                                                              | X | X | X | X | X | X | Best practice is well-established to promote prenatal smoking cessation yet implemented      |
| 21 | (2007)   | (Obstetricians,   |          | practice intervention                                                                                                   |   |   |   |   |   |   | by only one third of prenatal care providers in North Carolina. In this study, best practice |
| 22 | USA      | Midwives,         |          | including each of the 5 A's                                                                                             |   |   |   |   |   |   | was associated with resources, practice organization, and reimbursement. Augmented use       |
| 23 |          | Family            |          | and to assess the                                                                                                       |   |   |   |   |   |   | of available resources (e.g., toll-free hot-lines) and adequate reimbursement may promote    |
| 24 |          | Medicine          |          | relationship between best                                                                                               |   |   |   |   |   |   | best practice implementation.                                                                |
| 25 |          | Physicians,       |          | practice and current                                                                                                    |   |   |   |   |   |   |                                                                                              |
| 26 |          | Nurse             |          | intervention resources,                                                                                                 |   |   |   |   |   |   |                                                                                              |
| 27 |          | Practitioners and |          | prior training in smoking                                                                                               |   |   |   |   |   |   |                                                                                              |
| 28 | Helwig   | Health Providers  | Low risk | cessation intervention and                                                                                              | X |   |   | X | X | X | Maternity care providers underutilize effective methods of smoking cessation for their       |
| 29 | (1998)   | (Obstetricians,   |          | barriers to providing                                                                                                   |   |   |   |   |   |   | patients who smoke and rely on less effective methods.                                       |
| 30 | USA      | Family            |          | intervention.                                                                                                           |   |   |   |   |   |   |                                                                                              |
| 31 |          | Physicians,       |          | Investigate the usual                                                                                                   |   |   |   |   |   |   |                                                                                              |
| 32 |          | Midwives)         |          | intervention practices of                                                                                               |   |   |   |   |   |   |                                                                                              |
| 33 |          |                   |          | family physicians,                                                                                                      |   |   |   |   |   |   |                                                                                              |
| 34 | Herbert  | Health Providers  | Low risk | obstetricians, and nurse                                                                                                |   |   |   |   |   |   |                                                                                              |
| 35 | (2005)   | (GPs)             |          | midwives for their patients                                                                                             |   |   |   |   |   |   |                                                                                              |
| 36 | UK       |                   |          | who smoke.                                                                                                              |   |   |   |   |   |   |                                                                                              |
| 37 |          |                   |          | Determine a). General                                                                                                   |   | X |   | X | X |   | Most general practitioners (62%) believed NRT to be effective in pregnancy and safer         |
| 38 |          |                   |          | practitioners' confidence in                                                                                            |   |   |   |   |   |   | than smoking (70%), but fewer (45%) believed NRT to be safe in pregnancy. GPs who            |
| 39 |          |                   |          | their ability to deliver a                                                                                              |   |   |   |   |   |   | believed NRT use in pregnancy was safer than smoking were most likely to recall having       |
| 40 |          |                   |          | range of smoking cessation                                                                                              |   |   |   |   |   |   | prescribed it. Many general practitioners were unsure about the safety of NRT in             |
| 41 |          |                   |          | interventions, including                                                                                                |   |   |   |   |   |   | pregnancy. The key factor influencing general practitioners' prescribing decisions was a     |
| 42 |          |                   |          | NRT in pregnancy, b). the                                                                                               |   |   |   |   |   |   | belief that NRT use in pregnancy was likely to be safer than smoking.                        |
| 43 |          |                   |          | frequency with which                                                                                                    |   |   |   |   |   |   |                                                                                              |
| 44 |          |                   |          | general practitioners recall                                                                                            |   |   |   |   |   |   |                                                                                              |
| 45 |          |                   |          | prescribing NRT in                                                                                                      |   |   |   |   |   |   |                                                                                              |
| 46 |          |                   |          |                                                                                                                         |   |   |   |   |   |   |                                                                                              |

|    |                           |                                              |                                       |                                                                                                                                                                                                                                                                                                                                          |   |   |   |   |   |                                                                                                                                                                                                                                                                                                                                                                                                                                                                                                                                                                                                                                                                                                                                                                                                                                                                                                                    |
|----|---------------------------|----------------------------------------------|---------------------------------------|------------------------------------------------------------------------------------------------------------------------------------------------------------------------------------------------------------------------------------------------------------------------------------------------------------------------------------------|---|---|---|---|---|--------------------------------------------------------------------------------------------------------------------------------------------------------------------------------------------------------------------------------------------------------------------------------------------------------------------------------------------------------------------------------------------------------------------------------------------------------------------------------------------------------------------------------------------------------------------------------------------------------------------------------------------------------------------------------------------------------------------------------------------------------------------------------------------------------------------------------------------------------------------------------------------------------------------|
| 1  |                           |                                              |                                       | pregnancy and c). The factors that influence general practitioners to prescribe NRT in pregnancy.                                                                                                                                                                                                                                        |   |   |   |   |   |                                                                                                                                                                                                                                                                                                                                                                                                                                                                                                                                                                                                                                                                                                                                                                                                                                                                                                                    |
| 2  |                           |                                              |                                       |                                                                                                                                                                                                                                                                                                                                          |   |   |   |   |   |                                                                                                                                                                                                                                                                                                                                                                                                                                                                                                                                                                                                                                                                                                                                                                                                                                                                                                                    |
| 3  |                           |                                              |                                       |                                                                                                                                                                                                                                                                                                                                          |   |   |   |   |   |                                                                                                                                                                                                                                                                                                                                                                                                                                                                                                                                                                                                                                                                                                                                                                                                                                                                                                                    |
| 4  |                           |                                              |                                       |                                                                                                                                                                                                                                                                                                                                          |   |   |   |   |   |                                                                                                                                                                                                                                                                                                                                                                                                                                                                                                                                                                                                                                                                                                                                                                                                                                                                                                                    |
| 5  |                           |                                              |                                       |                                                                                                                                                                                                                                                                                                                                          |   |   |   |   |   |                                                                                                                                                                                                                                                                                                                                                                                                                                                                                                                                                                                                                                                                                                                                                                                                                                                                                                                    |
| 6  |                           |                                              |                                       |                                                                                                                                                                                                                                                                                                                                          |   |   |   |   |   |                                                                                                                                                                                                                                                                                                                                                                                                                                                                                                                                                                                                                                                                                                                                                                                                                                                                                                                    |
| 7  |                           |                                              |                                       |                                                                                                                                                                                                                                                                                                                                          |   |   |   |   |   |                                                                                                                                                                                                                                                                                                                                                                                                                                                                                                                                                                                                                                                                                                                                                                                                                                                                                                                    |
| 8  | Hickner (1990) USA        | Health Providers (Family Physicians)         | Low risk                              | Reports practitioner's attitudes and strategies towards antismoking interventions for pregnant smokers.                                                                                                                                                                                                                                  | X | X | X | X | X | Most physicians routinely assessed smoking status at the first prenatal visit, and advised pregnant smokers to quit smoking during pregnancy. The most frequently used method of intervention was personal counselling (97%), referral to smoking cessation clinics (40%), and behaviour modification (20%). Fifty-seven percent of physicians reported using antismoking pamphlets, and 30% used antismoking posters. 97% were convinced that the benefits of smoking cessation during pregnancy merited their efforts.                                                                                                                                                                                                                                                                                                                                                                                           |
| 9  |                           |                                              |                                       |                                                                                                                                                                                                                                                                                                                                          |   |   |   |   |   |                                                                                                                                                                                                                                                                                                                                                                                                                                                                                                                                                                                                                                                                                                                                                                                                                                                                                                                    |
| 10 |                           |                                              |                                       |                                                                                                                                                                                                                                                                                                                                          |   |   |   |   |   |                                                                                                                                                                                                                                                                                                                                                                                                                                                                                                                                                                                                                                                                                                                                                                                                                                                                                                                    |
| 11 |                           |                                              |                                       |                                                                                                                                                                                                                                                                                                                                          |   |   |   |   |   |                                                                                                                                                                                                                                                                                                                                                                                                                                                                                                                                                                                                                                                                                                                                                                                                                                                                                                                    |
| 12 |                           |                                              |                                       |                                                                                                                                                                                                                                                                                                                                          |   |   |   |   |   |                                                                                                                                                                                                                                                                                                                                                                                                                                                                                                                                                                                                                                                                                                                                                                                                                                                                                                                    |
| 13 | Hoekzema (2014) Australia | Pregnant Women                               | Low risk                              | To characterise pregnant smokers and to understand their smoking behaviours and preferences for smoking cessation. The specific objectives were to study the smoking patterns, smoking cessation and treatment preferences of pregnant women and to investigate the scope for a smoking cessation program in the antenatal settings.     |   | X | X |   | X | There were 87 (69.6%) daily smokers and 38 (30.4%) occasional smokers. Smokers mainly had medium (54; 43.2%) or heavy nicotine dependence (45; 36%). Current smokers were younger, Australian born, not living with a partner, from a lower socio-economic background, multigravida and had a smoker in their household or among friends. Although pregnant smokers were aware of the possible complications of smoking, their motivation and confidence to quit (median) on a 10-point scale were 7 and 4, respectively. Most smokers preferred to stop smoking gradually (74; 71.2%). The preferred methods for quitting were medications (49; 47.6%) and hypnotherapy (35; 34.0%). Patches (28; 29.5%) were the preferred dosage form, and nicotine replacement therapy (25; 28.1%) was the preferred medication. Less than half reported that their health professionals discouraged smoking during pregnancy. |
| 14 |                           |                                              |                                       |                                                                                                                                                                                                                                                                                                                                          |   |   |   |   |   |                                                                                                                                                                                                                                                                                                                                                                                                                                                                                                                                                                                                                                                                                                                                                                                                                                                                                                                    |
| 15 |                           |                                              |                                       |                                                                                                                                                                                                                                                                                                                                          |   |   |   |   |   |                                                                                                                                                                                                                                                                                                                                                                                                                                                                                                                                                                                                                                                                                                                                                                                                                                                                                                                    |
| 16 |                           |                                              |                                       |                                                                                                                                                                                                                                                                                                                                          |   |   |   |   |   |                                                                                                                                                                                                                                                                                                                                                                                                                                                                                                                                                                                                                                                                                                                                                                                                                                                                                                                    |
| 17 |                           |                                              |                                       |                                                                                                                                                                                                                                                                                                                                          |   |   |   |   |   |                                                                                                                                                                                                                                                                                                                                                                                                                                                                                                                                                                                                                                                                                                                                                                                                                                                                                                                    |
| 18 |                           |                                              |                                       |                                                                                                                                                                                                                                                                                                                                          |   |   |   |   |   |                                                                                                                                                                                                                                                                                                                                                                                                                                                                                                                                                                                                                                                                                                                                                                                                                                                                                                                    |
| 19 |                           |                                              |                                       |                                                                                                                                                                                                                                                                                                                                          |   |   |   |   |   |                                                                                                                                                                                                                                                                                                                                                                                                                                                                                                                                                                                                                                                                                                                                                                                                                                                                                                                    |
| 20 |                           |                                              |                                       |                                                                                                                                                                                                                                                                                                                                          |   |   |   |   |   |                                                                                                                                                                                                                                                                                                                                                                                                                                                                                                                                                                                                                                                                                                                                                                                                                                                                                                                    |
| 21 |                           |                                              |                                       |                                                                                                                                                                                                                                                                                                                                          |   |   |   |   |   |                                                                                                                                                                                                                                                                                                                                                                                                                                                                                                                                                                                                                                                                                                                                                                                                                                                                                                                    |
| 22 |                           |                                              |                                       |                                                                                                                                                                                                                                                                                                                                          |   |   |   |   |   |                                                                                                                                                                                                                                                                                                                                                                                                                                                                                                                                                                                                                                                                                                                                                                                                                                                                                                                    |
| 23 | Howard (2013) UK          | Pregnant Women                               | High risk – women with mental illness | Investigate whether pregnant women with mental disorders: a). Are less likely to accept referrals to smoking cessation services, b) are less likely to stop smoking by delivery, and c). Differ in their experiences of smoking, smoking cessation and smoking cessation services compared with pregnant women without mental disorders. |   |   | X | X |   | Pregnant women with mental disorders appear more motivated, yet find it more difficult, to stop smoking. Prioritisation of mental health over smoking may thus lead to increasing health inequality for this group.                                                                                                                                                                                                                                                                                                                                                                                                                                                                                                                                                                                                                                                                                                |
| 24 |                           |                                              |                                       |                                                                                                                                                                                                                                                                                                                                          |   |   |   |   |   |                                                                                                                                                                                                                                                                                                                                                                                                                                                                                                                                                                                                                                                                                                                                                                                                                                                                                                                    |
| 25 |                           |                                              |                                       |                                                                                                                                                                                                                                                                                                                                          |   |   |   |   |   |                                                                                                                                                                                                                                                                                                                                                                                                                                                                                                                                                                                                                                                                                                                                                                                                                                                                                                                    |
| 26 |                           |                                              |                                       |                                                                                                                                                                                                                                                                                                                                          |   |   |   |   |   |                                                                                                                                                                                                                                                                                                                                                                                                                                                                                                                                                                                                                                                                                                                                                                                                                                                                                                                    |
| 27 |                           |                                              |                                       |                                                                                                                                                                                                                                                                                                                                          |   |   |   |   |   |                                                                                                                                                                                                                                                                                                                                                                                                                                                                                                                                                                                                                                                                                                                                                                                                                                                                                                                    |
| 28 |                           |                                              |                                       |                                                                                                                                                                                                                                                                                                                                          |   |   |   |   |   |                                                                                                                                                                                                                                                                                                                                                                                                                                                                                                                                                                                                                                                                                                                                                                                                                                                                                                                    |
| 29 |                           |                                              |                                       |                                                                                                                                                                                                                                                                                                                                          |   |   |   |   |   |                                                                                                                                                                                                                                                                                                                                                                                                                                                                                                                                                                                                                                                                                                                                                                                                                                                                                                                    |
| 30 |                           |                                              |                                       |                                                                                                                                                                                                                                                                                                                                          |   |   |   |   |   |                                                                                                                                                                                                                                                                                                                                                                                                                                                                                                                                                                                                                                                                                                                                                                                                                                                                                                                    |
| 31 |                           |                                              |                                       |                                                                                                                                                                                                                                                                                                                                          |   |   |   |   |   |                                                                                                                                                                                                                                                                                                                                                                                                                                                                                                                                                                                                                                                                                                                                                                                                                                                                                                                    |
| 32 |                           |                                              |                                       |                                                                                                                                                                                                                                                                                                                                          |   |   |   |   |   |                                                                                                                                                                                                                                                                                                                                                                                                                                                                                                                                                                                                                                                                                                                                                                                                                                                                                                                    |
| 33 |                           |                                              |                                       |                                                                                                                                                                                                                                                                                                                                          |   |   |   |   |   |                                                                                                                                                                                                                                                                                                                                                                                                                                                                                                                                                                                                                                                                                                                                                                                                                                                                                                                    |
| 34 |                           |                                              |                                       |                                                                                                                                                                                                                                                                                                                                          |   |   |   |   |   |                                                                                                                                                                                                                                                                                                                                                                                                                                                                                                                                                                                                                                                                                                                                                                                                                                                                                                                    |
| 35 | Jones (2003) UK           | Pregnant Women & Health Providers (Midwives) | Low risk                              | Explore the attitudes of midwives and pregnant women towards smoking cessation advice to understand why it is not a routine part of antenatal care.                                                                                                                                                                                      |   | X |   | X |   | Only 45% of midwives offered smoking cessation advice routinely, although 82% felt it should be a part of the antenatal care (82%). Lack of time (66%) and training (54%) were the major reasons for this. Smoking cessation advice was not a priority for discussion among the midwives compared to topics such as antenatal screening or place of delivery. Women were aware of the dangers of smoking in pregnancy, but those who wanted to quit need more support from their midwives (83%). They ranked smoking cessation as a                                                                                                                                                                                                                                                                                                                                                                                |
| 36 |                           |                                              |                                       |                                                                                                                                                                                                                                                                                                                                          |   |   |   |   |   |                                                                                                                                                                                                                                                                                                                                                                                                                                                                                                                                                                                                                                                                                                                                                                                                                                                                                                                    |
| 37 |                           |                                              |                                       |                                                                                                                                                                                                                                                                                                                                          |   |   |   |   |   |                                                                                                                                                                                                                                                                                                                                                                                                                                                                                                                                                                                                                                                                                                                                                                                                                                                                                                                    |
| 38 |                           |                                              |                                       |                                                                                                                                                                                                                                                                                                                                          |   |   |   |   |   |                                                                                                                                                                                                                                                                                                                                                                                                                                                                                                                                                                                                                                                                                                                                                                                                                                                                                                                    |
| 39 |                           |                                              |                                       |                                                                                                                                                                                                                                                                                                                                          |   |   |   |   |   |                                                                                                                                                                                                                                                                                                                                                                                                                                                                                                                                                                                                                                                                                                                                                                                                                                                                                                                    |
| 40 |                           |                                              |                                       |                                                                                                                                                                                                                                                                                                                                          |   |   |   |   |   |                                                                                                                                                                                                                                                                                                                                                                                                                                                                                                                                                                                                                                                                                                                                                                                                                                                                                                                    |
| 41 |                           |                                              |                                       |                                                                                                                                                                                                                                                                                                                                          |   |   |   |   |   |                                                                                                                                                                                                                                                                                                                                                                                                                                                                                                                                                                                                                                                                                                                                                                                                                                                                                                                    |
| 42 |                           |                                              |                                       |                                                                                                                                                                                                                                                                                                                                          |   |   |   |   |   |                                                                                                                                                                                                                                                                                                                                                                                                                                                                                                                                                                                                                                                                                                                                                                                                                                                                                                                    |
| 43 |                           |                                              |                                       |                                                                                                                                                                                                                                                                                                                                          |   |   |   |   |   |                                                                                                                                                                                                                                                                                                                                                                                                                                                                                                                                                                                                                                                                                                                                                                                                                                                                                                                    |
| 44 |                           |                                              |                                       |                                                                                                                                                                                                                                                                                                                                          |   |   |   |   |   |                                                                                                                                                                                                                                                                                                                                                                                                                                                                                                                                                                                                                                                                                                                                                                                                                                                                                                                    |
| 45 |                           |                                              |                                       |                                                                                                                                                                                                                                                                                                                                          |   |   |   |   |   |                                                                                                                                                                                                                                                                                                                                                                                                                                                                                                                                                                                                                                                                                                                                                                                                                                                                                                                    |
| 46 |                           |                                              |                                       |                                                                                                                                                                                                                                                                                                                                          |   |   |   |   |   |                                                                                                                                                                                                                                                                                                                                                                                                                                                                                                                                                                                                                                                                                                                                                                                                                                                                                                                    |



1  
2  
3  
4  
5  
6  
7  
8  
9  
10  
11  
12  
13  
14  
15  
16  
17  
18  
19  
20  
21  
22  
23  
24  
25  
26  
27  
28  
29  
30  
31  
32  
33  
34  
35  
36  
37  
38  
39  
40  
41  
42  
43  
44  
45  
46

high priority for discussion at the antenatal visit. The midwives did not feel able to offer smoking cessation advice. The main reason being a of lack of time in the antenatal clinic.

|                                    |                                                               |          |                                                                                                                                                                                                                                               |   |   |   |   |   |   |                                                                                                                                                                                                                                                                                                                                                                                                                                                                                                                                                                                                                                                                                                                                                                                                             |
|------------------------------------|---------------------------------------------------------------|----------|-----------------------------------------------------------------------------------------------------------------------------------------------------------------------------------------------------------------------------------------------|---|---|---|---|---|---|-------------------------------------------------------------------------------------------------------------------------------------------------------------------------------------------------------------------------------------------------------------------------------------------------------------------------------------------------------------------------------------------------------------------------------------------------------------------------------------------------------------------------------------------------------------------------------------------------------------------------------------------------------------------------------------------------------------------------------------------------------------------------------------------------------------|
| Jordan (2006) USA                  | Health Providers (Obstetricians, Gynaecologist)               | Low risk | To assess Ohio obstetrician/gynaecologists' perceptions and use of the 5A's methods of smoking cessation with pregnant patients who smoking.                                                                                                  | X | X | X | X | X | X | Obstetrician/gynaecologists face many competing demands for their time and energy, yet 62% believed smoking cessation advice would be of significant value. Physicians with higher levels of efficacy expectations reported significantly greater use of the 5 As. Future research should explore ways to facilitate obstetrician/gynaecologists' use of the 5As method.                                                                                                                                                                                                                                                                                                                                                                                                                                    |
| Lemola (2012) Switzerland          | Health Providers (Gynaecologists, Midwives)                   | Low risk | Examined whether gynaecologists and midwives engage in screening and counselling of pregnant women and conducting interventions to prevent smoking during pregnancy. Examine control beliefs involving efficacy expectations of practitioner. | X | X |   |   | X |   | Most gynaecologists and midwives reported screening all pregnant patients regarding smoking, explaining the risks and recommending smoking cessation. By contrast, only a minority engages in more extensive prevention efforts. Strong control beliefs were predictive of a higher likelihood of screening and counselling, as well as of engaging in more extensive interventions.                                                                                                                                                                                                                                                                                                                                                                                                                        |
| Mabbutt (2002) Australia           | Pregnant Women                                                | Low risk | To examine substance use among pregnant women and their partners, to record changes in reported substance use during pregnancy and to determine what advice they received to stop smoking.                                                    |   | X |   |   |   |   | Routine advice to quit smoking was not the norm for this group who were motivated to attend antenatal classes and possibly more likely to act on quit smoking advice. Of the women and men who did receive advice to quit smoking, the majority of this advice was not from a health professional. Routine advice about quitting smoking should be a mandatory part of antenatal care, especially for disadvantaged groups, where smoking rates are higher. The antenatal setting accesses most pregnant women and provides a population base for comprehensive anti-smoking strategies for them and for their partners. Failure to implement such strategies would be to miss the opportunity for a cost-effective and disseminable public health intervention for pregnant women and their male partners. |
| McEwen (2003) UK                   | Health Providers (GPs)                                        | Low risk | Investigate methods of early referral of pregnant smokers.                                                                                                                                                                                    | X |   |   |   |   | X | From a total of 55 GPs, in 17 practices within a deprived area of South West London, according to predictions from the delivery figures for the previous year, approximately 120 pregnant smokers should be identified within the 9-month period that the study took place. GPs were invited to use whatever form of referral was most convenient to them. Only 8 referrals were received.                                                                                                                                                                                                                                                                                                                                                                                                                  |
| Mejia (2010) Argentina and Uruguay | HEALTH PROVIDERS (Obstetricians, Gynaecologists, & Residents) | Low risk | To describe physicians' practices of smoking cessation and second-hand smoke exposure counselling during prenatal visits.                                                                                                                     | X | X |   |   |   | X | Although 88.9% of practitioners always or almost always advised women to stop smoking, 75% believed it was acceptable for pregnant women to smoke up to 6 cigarettes per day. The risk of SHS exposure was 'always or almost always discussed' by only 34.5% of physicians. Multivariate logistic regression showed that lack of training was associated with less counselling about smoking cessation (OR 0.18; 95% CI 0.04-0.82) and SHS exposure (OR 0.27; 95% CI 0.12-0.59). Current compared to never smokers had lower odds of smoking cessation counselling (OR 0.39; 95% CI 0.05-0.82). Current smokers were less likely than former smokers to counsel about SHS (OR 0.25; 95% CI 0.11-0.62).                                                                                                      |
| Moran (2003) USA                   | Health Providers (Family Practitioner,                        | Low risk | To assess how frequently physicians identified the smoking status of pregnant                                                                                                                                                                 |   |   |   |   |   | X | Physicians identified pregnant women's smoking status at 81% of visits but provided smoking counselling at only 23% of visits by pregnant smokers. Physicians were less                                                                                                                                                                                                                                                                                                                                                                                                                                                                                                                                                                                                                                     |

|    |           |                  |            |                              |   |   |   |   |   |                                                                                              |
|----|-----------|------------------|------------|------------------------------|---|---|---|---|---|----------------------------------------------------------------------------------------------|
| 1  |           |                  |            |                              |   |   |   |   |   |                                                                                              |
| 2  |           |                  |            |                              |   |   |   |   |   |                                                                                              |
| 3  |           | General          |            | patients and how frequently  |   |   |   |   |   | likely to identify smoking status of non-White pregnant women but no less likely to          |
| 4  |           | Practitioner,    |            | physicians counselled        |   |   |   |   |   | counsel non-White smokers.                                                                   |
| 5  |           | Obstetrician, &  |            | pregnant smokers.            |   |   |   |   |   |                                                                                              |
| 6  |           | Gynaecologist)   |            |                              |   |   |   |   |   |                                                                                              |
| 7  | Mullen    | Health Providers | Low risk   | To describe Texas            | X |   | X | X | X | Obstetricians who are not reached by expert reports and guidelines from groups outside       |
| 8  | (1998)    | (Obstetricians)  |            | obstetricians' pregnancy     |   |   |   |   |   | their specialty or who do not perceive the seriousness of maternal smoking are less likely   |
| 9  | USA       |                  |            | smoking cessation            |   |   |   |   |   | to counsel consistently and to use the most effective techniques.                            |
| 10 |           |                  |            | counselling activity and to  |   |   |   |   |   |                                                                                              |
| 11 |           |                  |            | identify attributes          |   |   |   |   |   |                                                                                              |
| 12 |           |                  |            | associated with consistent,  |   |   |   |   |   |                                                                                              |
| 13 | Murphy    | Health Providers | Low risk   | to assess the knowledge,     | X | X |   |   |   | This study identified several constraints to midwives fulfilling this role, which affected   |
| 14 | (2016)    | (Midwives)       |            | attitudes, beliefs and       |   |   |   |   |   | their perceived behavioural control. These included stressful working conditions, too little |
| 15 | South     |                  |            | current practices of South   |   |   |   |   |   | time, a dearth of educational resources and a lack of knowledge of best practice             |
| 16 | Africa    |                  |            | Africa midwives in relation  |   |   |   |   |   | intervention methods and counselling skills. Perceived patient resistance to quitting was a  |
| 17 |           |                  |            | to providing smoking         |   |   |   |   |   | further obstacle.                                                                            |
| 18 |           |                  |            | cessation education or       |   |   |   |   |   |                                                                                              |
| 19 |           |                  |            | counselling to pregnant      |   |   |   |   |   |                                                                                              |
| 20 | Oncken    | Health Providers | Low risk   | To assess smoking            |   | X |   |   | X | We found that nicotine replacement therapies are commonly prescribed or recommended          |
| 21 | (2000)    | (Obstetrics &    |            | cessation counselling and    |   |   |   |   |   | to pregnant smokers by obstetric providers, but less commonly to lactating women by          |
| 22 | USA       | Paediatric)      |            | nicotine replacement         |   |   |   |   |   | paediatric providers.                                                                        |
| 23 |           |                  |            | therapy prescription and     |   |   |   |   |   |                                                                                              |
| 24 |           |                  |            | recommendation practices     |   |   |   |   |   |                                                                                              |
| 25 |           |                  |            | among obstetric and          |   |   |   |   |   |                                                                                              |
| 26 | Owen      | Pregnant         | Low risk   | paediatric providers.        |   |   |   |   |   |                                                                                              |
| 27 | (1999)    | Women            |            | Examines pregnant            |   | X |   |   |   | Less than 50% of pregnant smokers reported having received advice on smoking from a          |
| 28 | UK        |                  |            | women's reports of quality   |   |   |   |   |   | health professional during their current pregnancy: little change since the question was     |
| 29 |           |                  |            | and quantity of health       |   |   |   |   |   | first asked in 1994. Advice, when given, appeared to have had little impact on smoking       |
| 30 |           |                  |            | professional interventions   |   |   |   |   |   | cessation, and did not follow best available evidence, namely to quit rather than cut down.  |
| 31 |           |                  |            | from 1992 – 1999.            |   |   |   |   |   |                                                                                              |
| 32 | Passey    | Health Providers | High       | Aims to explore the          | X |   |   |   | X | Most respondents considered assessment of smoking status to be integral to antenatal care    |
| 33 | (2012)    | (AHW,            | Risk-      | knowledge and attitudes of   |   |   |   |   |   | and a professional responsibility. Most (79%) indicated that they assess smoking status in   |
| 34 | Australia | Midwives or      | women      | health care providers caring |   |   |   |   |   | 100% of clients. Knowledge of risks was generally good, but knowledge of cessation was       |
| 35 |           | Nurses,          | Aboriginal | for pregnant Australian      |   |   |   |   |   | poor.                                                                                        |
| 36 |           | Doctors)         | and Torres | Aboriginal women             |   |   |   |   |   | Factors independently associated with assessing smoking status among all women were:         |
| 37 |           |                  | Strait     | regarding smoking risk and   |   |   |   |   |   | employer service type (p = 0.025); cessation knowledge score (p = 0.011); and                |
| 38 |           |                  | Islander   | cessation and identify       |   |   |   |   |   | disagreeing with the statement that giving advice is not worth it given the low level of     |
| 39 |           |                  |            | factors associate with self- |   |   |   |   |   | success (p = 0.011).                                                                         |
| 40 |           |                  |            | reported assessment of       |   |   |   |   |   |                                                                                              |
| 41 |           |                  |            | smoking. Optimal and         |   |   |   |   |   |                                                                                              |
| 42 |           |                  |            | assessment of smoking        |   |   |   |   |   |                                                                                              |
| 43 |           |                  |            | status.                      |   |   |   |   |   |                                                                                              |

|    |                |                                                            |                                       |                                                                                                                                                   |   |   |   |   |   |     |                                                                                                                                                                                                                                                                                                                                                                                                                                                                                                                                                                                                                                                                                                                                      |
|----|----------------|------------------------------------------------------------|---------------------------------------|---------------------------------------------------------------------------------------------------------------------------------------------------|---|---|---|---|---|-----|--------------------------------------------------------------------------------------------------------------------------------------------------------------------------------------------------------------------------------------------------------------------------------------------------------------------------------------------------------------------------------------------------------------------------------------------------------------------------------------------------------------------------------------------------------------------------------------------------------------------------------------------------------------------------------------------------------------------------------------|
| 1  |                |                                                            |                                       |                                                                                                                                                   |   |   |   |   |   |     |                                                                                                                                                                                                                                                                                                                                                                                                                                                                                                                                                                                                                                                                                                                                      |
| 2  |                |                                                            |                                       |                                                                                                                                                   |   |   |   |   |   |     |                                                                                                                                                                                                                                                                                                                                                                                                                                                                                                                                                                                                                                                                                                                                      |
| 3  | Passey (2015)  | Pregnant Women                                             | High Risk-women                       | Provision of antenatal smoking cessation support: A survey with pregnant Aboriginal and Torres Strait Islander women.                             | X | X |   | X |   |     | Despite most pregnant women who smoke reporting advice and support to quit, the persisting high prevalence of smoking suggests that this support is insufficient to overcome the many factors pushing women to smoke.                                                                                                                                                                                                                                                                                                                                                                                                                                                                                                                |
| 4  | Australia      |                                                            | Aboriginal and Torres Strait Islander |                                                                                                                                                   |   |   |   |   |   |     |                                                                                                                                                                                                                                                                                                                                                                                                                                                                                                                                                                                                                                                                                                                                      |
| 5  |                |                                                            |                                       |                                                                                                                                                   |   |   |   |   |   |     |                                                                                                                                                                                                                                                                                                                                                                                                                                                                                                                                                                                                                                                                                                                                      |
| 6  |                |                                                            |                                       |                                                                                                                                                   |   |   |   |   |   |     |                                                                                                                                                                                                                                                                                                                                                                                                                                                                                                                                                                                                                                                                                                                                      |
| 7  |                |                                                            |                                       |                                                                                                                                                   |   |   |   |   |   |     |                                                                                                                                                                                                                                                                                                                                                                                                                                                                                                                                                                                                                                                                                                                                      |
| 8  |                |                                                            |                                       |                                                                                                                                                   |   |   |   |   |   |     |                                                                                                                                                                                                                                                                                                                                                                                                                                                                                                                                                                                                                                                                                                                                      |
| 9  | Passey (2014)  | Health Providers (AHW, Midwives or Nurses, Doctors)        | High Risk-women                       | Supporting pregnant Aboriginal and Torres Strait Islander women to quit smoking: views of antenatal care providers and pregnant indigenous women. |   |   |   |   |   | NA* | Current smokers (n = 121) were less positive about the potential effectiveness of most of the 12 strategies than the providers (n = 127). For example, family support was considered helpful by 64 % of smokers and 91 % of providers; between 56 and 62 % of smokers considered advice and support from midwives, doctors or Aboriginal Health Workers likely to be helpful, compared to 85-90 % of providers. Rewards for quitting were considered helpful by 63 % of smokers and 56 % of providers, with smokers rating them more highly and providers rating them lower, than most other strategies. Quitline was least popular for both.                                                                                        |
| 10 | Australia      |                                                            | Aboriginal and Torres Strait Islander |                                                                                                                                                   |   |   |   |   |   |     |                                                                                                                                                                                                                                                                                                                                                                                                                                                                                                                                                                                                                                                                                                                                      |
| 11 |                |                                                            |                                       |                                                                                                                                                   |   |   |   |   |   |     |                                                                                                                                                                                                                                                                                                                                                                                                                                                                                                                                                                                                                                                                                                                                      |
| 12 |                |                                                            |                                       |                                                                                                                                                   |   |   |   |   |   |     |                                                                                                                                                                                                                                                                                                                                                                                                                                                                                                                                                                                                                                                                                                                                      |
| 13 |                |                                                            |                                       |                                                                                                                                                   |   |   |   |   |   |     |                                                                                                                                                                                                                                                                                                                                                                                                                                                                                                                                                                                                                                                                                                                                      |
| 14 |                |                                                            |                                       |                                                                                                                                                   |   |   |   |   |   |     |                                                                                                                                                                                                                                                                                                                                                                                                                                                                                                                                                                                                                                                                                                                                      |
| 15 | Price (2006)   | Health Providers (Nurse-Midwives)                          | Low risk                              | Perceptions and Use of Smoking Cessation in Nurse-Midwives' Practice.                                                                             | X | X | X | X | X | X   | Few nurse-midwives identified barriers to counselling pregnant patients who smoked, but the most common were lack of time (14%) and not knowing where to send pregnant smokers for treatment (14%). Most respondents believed that nicotine replacement therapy (NRT) would be most likely to reduce the number of pregnant smokers (74%), yet few (26%) were confident in their ability to prescribe/recommend nicotine replacement therapy. Respondents more likely to use 5 A's can be characterized as the following: had higher efficacy expectations in their ability to communicate issues about the 5 A's and had higher outcome expectations regarding the effects of using the 5 A's.                                      |
| 16 | USA            |                                                            |                                       |                                                                                                                                                   |   |   |   |   |   |     |                                                                                                                                                                                                                                                                                                                                                                                                                                                                                                                                                                                                                                                                                                                                      |
| 17 |                |                                                            |                                       |                                                                                                                                                   |   |   |   |   |   |     |                                                                                                                                                                                                                                                                                                                                                                                                                                                                                                                                                                                                                                                                                                                                      |
| 18 |                |                                                            |                                       |                                                                                                                                                   |   |   |   |   |   |     |                                                                                                                                                                                                                                                                                                                                                                                                                                                                                                                                                                                                                                                                                                                                      |
| 19 |                |                                                            |                                       |                                                                                                                                                   |   |   |   |   |   |     |                                                                                                                                                                                                                                                                                                                                                                                                                                                                                                                                                                                                                                                                                                                                      |
| 20 |                |                                                            |                                       |                                                                                                                                                   |   |   |   |   |   |     |                                                                                                                                                                                                                                                                                                                                                                                                                                                                                                                                                                                                                                                                                                                                      |
| 21 |                |                                                            |                                       |                                                                                                                                                   |   |   |   |   |   |     |                                                                                                                                                                                                                                                                                                                                                                                                                                                                                                                                                                                                                                                                                                                                      |
| 22 | Price (2006)   | Health Providers (Obstetricians, Gynaecologists)           | Low risk                              | Obstetricians and gynaecologists' perceptions and use of nicotine replacement therapy.                                                            | X | X | X | X | X | X   | The majority did not prescribe NRT possibly because few respondents received cigarette smoking cessation training in medical school or their residencies. Significant revisions in professional training and more continuing medical education are needed regarding smoking cessation and use of NRT.                                                                                                                                                                                                                                                                                                                                                                                                                                |
| 23 | USA            |                                                            |                                       |                                                                                                                                                   |   |   |   |   |   |     |                                                                                                                                                                                                                                                                                                                                                                                                                                                                                                                                                                                                                                                                                                                                      |
| 24 |                |                                                            |                                       |                                                                                                                                                   |   |   |   |   |   |     |                                                                                                                                                                                                                                                                                                                                                                                                                                                                                                                                                                                                                                                                                                                                      |
| 25 | Pullon (2004)  | Health Providers (GPs Practicing Obstetrics, Midwives)     | Low risk                              | Smoking cessation and nicotine replacement therapy in current primary maternity care.                                                             | X | X |   |   |   | X   | Only about half of the health professional gave smoking cessation advice to most pregnant women who smoked. They were uncertain about the safety of NRT use in pregnant and breastfeeding women. Most respondents requested more information about NRT use.                                                                                                                                                                                                                                                                                                                                                                                                                                                                          |
| 26 | NZ             |                                                            |                                       |                                                                                                                                                   |   |   |   |   |   |     |                                                                                                                                                                                                                                                                                                                                                                                                                                                                                                                                                                                                                                                                                                                                      |
| 27 |                |                                                            |                                       |                                                                                                                                                   |   |   |   |   |   |     |                                                                                                                                                                                                                                                                                                                                                                                                                                                                                                                                                                                                                                                                                                                                      |
| 28 |                |                                                            |                                       |                                                                                                                                                   |   |   |   |   |   |     |                                                                                                                                                                                                                                                                                                                                                                                                                                                                                                                                                                                                                                                                                                                                      |
| 29 | Roske (2009)   | Health Providers (Midwives, Gynaecologists, Paediatrician) | Low risk                              | Smoking cessation counselling for pregnant and postpartum women among midwives, gynaecologists and paediatricians in Germany.                     | X | X |   | X |   |     | Depending on profession, 90 % to 100 % see smoking cessation counselling as their assignment, 17 % to 80 % screen for, 48 % to 90 % document smoking status, and 55 % to 76 % offer brief or extensive counselling. 61 % to 87 % consider training to enhance their knowledge and/or counselling skills necessary. The compliance of providers with the necessity to give support in smoking cessation is very high. However, the status of cessation counselling does not sufficiently correspond to the evidence based requirements.                                                                                                                                                                                               |
| 30 | Germany        |                                                            |                                       |                                                                                                                                                   |   |   |   |   |   |     |                                                                                                                                                                                                                                                                                                                                                                                                                                                                                                                                                                                                                                                                                                                                      |
| 31 |                |                                                            |                                       |                                                                                                                                                   |   |   |   |   |   |     |                                                                                                                                                                                                                                                                                                                                                                                                                                                                                                                                                                                                                                                                                                                                      |
| 32 |                |                                                            |                                       |                                                                                                                                                   |   |   |   |   |   |     |                                                                                                                                                                                                                                                                                                                                                                                                                                                                                                                                                                                                                                                                                                                                      |
| 33 |                |                                                            |                                       |                                                                                                                                                   |   |   |   |   |   |     |                                                                                                                                                                                                                                                                                                                                                                                                                                                                                                                                                                                                                                                                                                                                      |
| 34 | Solberg (2010) | Pregnant Women                                             | Low risk                              | Disparities in tobacco cessation medication orders and fills among special populations.                                                           |   |   |   | X |   | X   | 32,733 current users of tobacco, 18,047 of whom had both health insurance and pharmacy claims data available. After adjustment, 15.4% overall had received an order for cessation medications during this year, but only 78% had filled it. Groups receiving fewer orders than their comparison groups were aged 18-34 years or older than 65 years, men, pregnant women, Asians and Hispanics, and those with non-English-language preference, on Medicaid, or with fewer visits. The same groups were less likely to fill that prescription, except patients with non-English preference or Medicaid. There are disparities in both the receipt of cessation medication orders and the likelihood of filling them for some special |
| 35 | USA            |                                                            |                                       |                                                                                                                                                   |   |   |   |   |   |     |                                                                                                                                                                                                                                                                                                                                                                                                                                                                                                                                                                                                                                                                                                                                      |
| 36 |                |                                                            |                                       |                                                                                                                                                   |   |   |   |   |   |     |                                                                                                                                                                                                                                                                                                                                                                                                                                                                                                                                                                                                                                                                                                                                      |
| 37 |                |                                                            |                                       |                                                                                                                                                   |   |   |   |   |   |     |                                                                                                                                                                                                                                                                                                                                                                                                                                                                                                                                                                                                                                                                                                                                      |
| 38 |                |                                                            |                                       |                                                                                                                                                   |   |   |   |   |   |     |                                                                                                                                                                                                                                                                                                                                                                                                                                                                                                                                                                                                                                                                                                                                      |
| 39 |                |                                                            |                                       |                                                                                                                                                   |   |   |   |   |   |     |                                                                                                                                                                                                                                                                                                                                                                                                                                                                                                                                                                                                                                                                                                                                      |
| 40 |                |                                                            |                                       |                                                                                                                                                   |   |   |   |   |   |     |                                                                                                                                                                                                                                                                                                                                                                                                                                                                                                                                                                                                                                                                                                                                      |
| 41 |                |                                                            |                                       |                                                                                                                                                   |   |   |   |   |   |     |                                                                                                                                                                                                                                                                                                                                                                                                                                                                                                                                                                                                                                                                                                                                      |
| 42 |                |                                                            |                                       |                                                                                                                                                   |   |   |   |   |   |     |                                                                                                                                                                                                                                                                                                                                                                                                                                                                                                                                                                                                                                                                                                                                      |
| 43 |                |                                                            |                                       |                                                                                                                                                   |   |   |   |   |   |     |                                                                                                                                                                                                                                                                                                                                                                                                                                                                                                                                                                                                                                                                                                                                      |
| 44 |                |                                                            |                                       |                                                                                                                                                   |   |   |   |   |   |     |                                                                                                                                                                                                                                                                                                                                                                                                                                                                                                                                                                                                                                                                                                                                      |
| 45 |                |                                                            |                                       |                                                                                                                                                   |   |   |   |   |   |     |                                                                                                                                                                                                                                                                                                                                                                                                                                                                                                                                                                                                                                                                                                                                      |
| 46 |                |                                                            |                                       |                                                                                                                                                   |   |   |   |   |   |     |                                                                                                                                                                                                                                                                                                                                                                                                                                                                                                                                                                                                                                                                                                                                      |

1  
2  
3  
4  
5  
6  
7  
8  
9  
10  
11  
12  
13  
14  
15  
16  
17  
18  
19  
20  
21  
22  
23  
24  
25  
26  
27  
28  
29  
30  
31  
32  
33  
34  
35  
36  
37  
38  
39  
40  
41  
42  
43  
44  
45  
46

populations. The causes are likely to be complex, but this information provides a starting point for learning to improve this problem.

Poor smoking cessation outcomes are a product of current limitations to identification, referral, engagement and treatment. Carbon monoxide breath testing can bypass this difficulty of patient providing faulty information.

Smoking and exposure to environmental tobacco smoke are seen as prominent health threats that midwives reported they addressed routinely, including giving advice to stop smoking.

Almost all women reported that their prenatal care provider asked if they smoked, but only 56.7% reported that a provider counselled them to quit smoking. Only 11.5% of women who smoked in late pregnancy used a cessation method, including self-help materials (6.3%); medications (3.9%); face-to-face counselling (1.7%); telephone-based counselling (1.5%); Internet-based counselling (1.3%); and a class or program (1.0%).

Of 594 first trimester pregnant smokers, the majority were asked and advised about smoking by a prenatal care provider. However, a substantial proportion of women did not receive assistance to quit and only 42.2% received all three steps. Significant racial/ethnic variations were found only in the Assist step. Compared to non-Hispanic (NH) White women, NH American Indian women had lower odds of receiving all three steps. In contrast, NH Black women had increased odds of receiving all three steps. We conclude that there is a need for prenatal care providers to address tobacco use, especially to Assist quitting, with all pregnant smokers.

Most staff reported they assessed clients' smoking status most or all of the time (92.2%). However, only a minority reported they offered a Quitline referral (42.2%), provided follow-up support (28.6%) or provided nicotine replacement therapy (4.7%) to most or all clients who smoked. Few staff felt confident in motivating clients to quit smoking (19.7%) and advising clients about using nicotine replacement therapy (15.6%). Staff confident with talking to clients about how smoking affected their health had significantly higher odds of offering a Quitline referral and quitting assistance to clients who smoke.

Smoking advice was rated an essential activity at the first antenatal visit by 69% of responding directors. Nonetheless, only 12% of clinics indicated they offered relevant training and 4% reported written policies. Results also indicate senior staff may have suboptimal levels of awareness of smoking risks. Clinics used a narrow array of strategies

1  
2  
3  
4  
5  
6  
7  
8  
9  
10  
11  
12  
13  
14  
15  
16  
17  
18  
19  
20  
21  
22  
23  
24  
25  
26  
27  
28  
29  
30  
31  
32  
33  
34  
35  
36  
37  
38  
39  
40  
41  
42  
43  
44  
45  
46

to promote cessation. Almost one-third of directors said they advised smokers to cut down rather than stop smoking completely.

|                  |                                                                                                     |          |                                                                                                                                                                |   |   |   |   |   |   |                                                                                                                                                                                                                                                                                                                                                                                                                                                                                                                                                                                                            |
|------------------|-----------------------------------------------------------------------------------------------------|----------|----------------------------------------------------------------------------------------------------------------------------------------------------------------|---|---|---|---|---|---|------------------------------------------------------------------------------------------------------------------------------------------------------------------------------------------------------------------------------------------------------------------------------------------------------------------------------------------------------------------------------------------------------------------------------------------------------------------------------------------------------------------------------------------------------------------------------------------------------------|
| Zapka (2000) USA | Health Providers (Physician, Nurse-Practitioner or Midwife, RN, Nutritionists, Nutrition Assistant) | Low risk | Assess providers' performance of smoking cessation counselling steps with low-income pregnant and postpartum women receiving care at community health centres. | X | X | X | X | X | X | Providers in obstetric clinics had the highest scores and those in paediatric clinics had the lowest scores. Nurse practitioners and nutritionists had higher scores than other providers. Clinic type, greater smoking-related knowledge, older age, and perception of smoking cessation as a priority were independently related to better counselling performance. Low scores for performance of steps beyond assessment and advice indicate a need for emphasis on the assistance and follow-up steps of national guidelines. Providers' own commitment to helping mothers stop smoking was important. |
|------------------|-----------------------------------------------------------------------------------------------------|----------|----------------------------------------------------------------------------------------------------------------------------------------------------------------|---|---|---|---|---|---|------------------------------------------------------------------------------------------------------------------------------------------------------------------------------------------------------------------------------------------------------------------------------------------------------------------------------------------------------------------------------------------------------------------------------------------------------------------------------------------------------------------------------------------------------------------------------------------------------------|

---

NA – Not applicable to study or not described

### Supplementary Text 1: Grouping of outcome measures for the meta-analyses

For each outcome (Ask, Advice, Assess motivation to quit, Assess nicotine dependence, Assist, Arrange follow up, Arrange referral, NRT), we looked at the specific measurement that was done to decide whether it was feasible to group together. To achieve this we looked both at data collection method – cross-sectional survey/ audit of patients medical records/ audio-recording of consultation/ women’s report through survey or interview; and also on the measure itself that was used – Likert scale/ dichotomous YES/NO question and so forth.

ASK – overall 38 manuscripts had data on ASK. Out of these 12 used a survey measure reflecting asking all of their patients. We included in this analysis the proportion answering always if a Likert scale was used, or the proportion answering Yes if a dichotomous question was used either asking if you ask all of your patients? Or if you ask your patients always? Answers reflecting asking more than 75% of their patients were also considered as Yes for this analysis. 9 other manuscript used a survey measure reflecting asking usually and always – this including the combined answers in Likert scales (always and usually; and/or most of the time and all of the time). Two manuscripts provided data for both these measures (Bar-Zeev et al and Mejia et al). 4 other manuscripts used women’s report whether they recall been asked during their pregnancy.

Advice – The same principles as used in ASK (see above). Advice always included 6 manuscripts using either Likert scales or asking whether you always advise your patients to quit. Advice always and often included 9 manuscripts using either a scale of always and often; or always and usually; or advising all and most of women; or a Yes/No question whether you advice routinely (to more than 50% of patients). Since 8 manuscripts used a more general “Do you advise Yes/No” question, without referring to the amount of patients this is done with, these were grouped separately as Advice Yes/No. 4 other manuscripts used women’s report whether they recall been advised to quit during their pregnancy.

Assess motivation to quit – 10 manuscripts in total included some aspect of assessing motivation to quit. 1 used audio-recordings. 2 manuscripts used a measure calculating the mean on a different scale (1-5 and 1-3). 1 used women report. 1 reported on % always only. 1 reported on % usually always. 3 manuscripts assessed willingness to quit in general (with no time point included in the question) and reported on the proportion that answered “always and usually” – these were included in the meta-analysis. One paper asked a similar question but defined this as “% always usually assess whether the patient is willing to make a quit attempt within the next 30 days”. Since this included a specific time-point it was considered to be different to the other 3 and not included.

Assess nicotine dependence – Only 3 papers included a question on this topic. 1 reported on % always and often; 1 reported on % always; and 1 reported also on % always and often but asked a general question on # of cig. smoked and not specific to assessing nicotine dependence. It was decided not to run a meta-analysis on these as too different.

Assist – This included many different definitions of assist in quitting – some were general about assisting the patient to quit, and some included a more specific method of assisting such as counselling or setting a quit data.

Overall 34 different manuscripts included some kind of question on assisting. 4 manuscripts had data on women’s report on whether they recalled been offered any support to quit – these were general such as “Did your doctor or other HCP ever tell you (at least in one visit) about things you could do to quit smoking?”, recalled being offered assistance to quit by health providers; report that their provider offered suggestions for quitting, recall health providers offer support to quit smoking yes/no. 3 manuscripts reported on % reporting always and often helping their patients to set a specific quit data – this included a Likert scale of always and often, or arrange setting a quit data with at least 50% of their patients, or arranging this with most and all of their patients. Only 1 extra manuscript reported specifically on a quit date but included a general not specific Yes/No question - % reporting they negotiate a quit date with their patients – therefore this was not included in the meta-analysis. For “Assist-Often-Always-CessationSupport” the same principles as for ASK were applied here as well – ‘always and often’ was combined with ‘always and usually’, and with ‘most and all of the patients’ and with ‘to at least 50% of the patients’. Included in this were any questions using this measurement of general counselling or providing support or assistance – total 5 papers. An additional 5 papers were used for the meta-analysis for Assist-Yes-Counselling – this included any general questions about counselling Yes/No, any general statement of proportion reporting counselling. For Roske note that in the paper they separated based on those reporting providing counselling over 10 minutes and those reported providing brief counselling (under 10 minutes) – the total proportion providing counselling Yes/No was calculated combining these two together. Assist always often quit plan – only 2 papers included a measure about a quit plan and/or specific steps needed

1  
2  
3 to take to quit. Other papers included either other measures for these outcomes (for example a mean), or  
4 measured other assist such as assist by providing social support. These were different from each other so were  
5 not included in the meta-analysis.  
6

7 Arrange follow up – Measures were different from each other so no meta-analysis was done. 2 manuscripts  
8 included a measure of always/often general follow up with no mention of a time point; 1 reported % following  
9 up on all of the patients; 1 measured % always following up but within a week; and 2 reported always/often  
10 within a week.

11 Arrange referral – Similar to the principles used for ASK (see above) – 6 papers measured % always/often  
12 referring - always and usually, always and often, all and most of patients. 3 papers measured always – we  
13 decided not to do a meta-analysis due to limits of # of meta-analysis, and these were only 3.  
14

15 NRT – Same principles as for ASK regarding proportion reporting often/always prescribing NRT (4 papers) and  
16 proportion reporting always prescribing (4 papers). We also performed a meta-analysis on 6 papers that included  
17 a more general measurement of whether they prescribe or not – included in this were proportion reporting  
18 prescribing at least sometimes; proportion recalling prescribing NRT in pregnancy; proportion reporting using  
19 this method, proportion using this method currently.  
20  
21  
22  
23  
24  
25  
26  
27  
28  
29  
30  
31  
32  
33  
34  
35  
36  
37  
38  
39  
40  
41  
42  
43  
44  
45  
46  
47  
48  
49  
50  
51  
52  
53  
54  
55  
56  
57  
58  
59  
60

1  
2  
3  
4  
5  
6  
7  
8  
9  
10  
11  
12  
13  
14  
15  
16  
17  
18  
19  
20  
21  
22  
23  
24  
25  
26  
27  
28  
29  
30  
31  
32  
33  
34  
35  
36  
37  
38  
39  
40  
41  
42  
43  
44  
45  
46

Supplementary Forest Plot Figures 1-17

For peer review only



**Figure 1: Meta-analysis: Performance of "ASK" often/always**

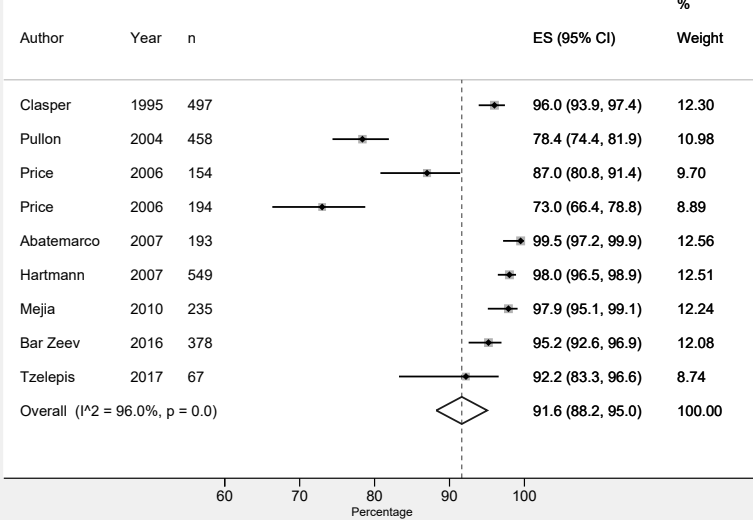

**Figure 2: Meta-analysis: Performance of "ASK" always/all**

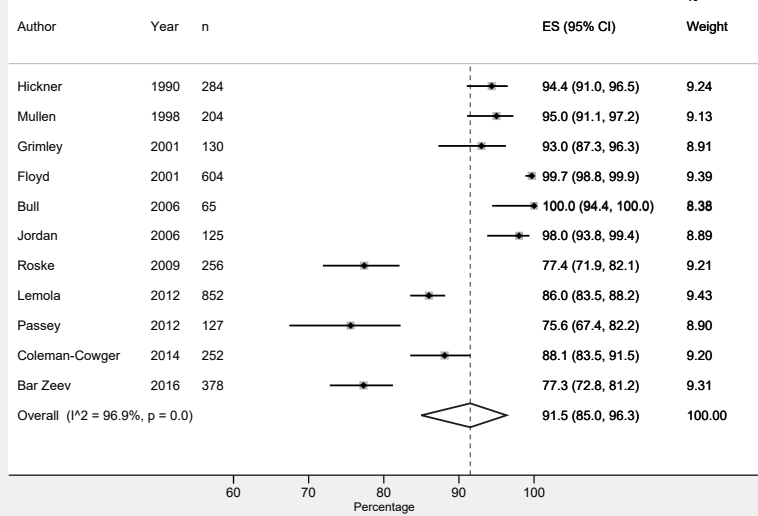

**Figure 3: Meta-analysis: Performance of "ASK" women's report**

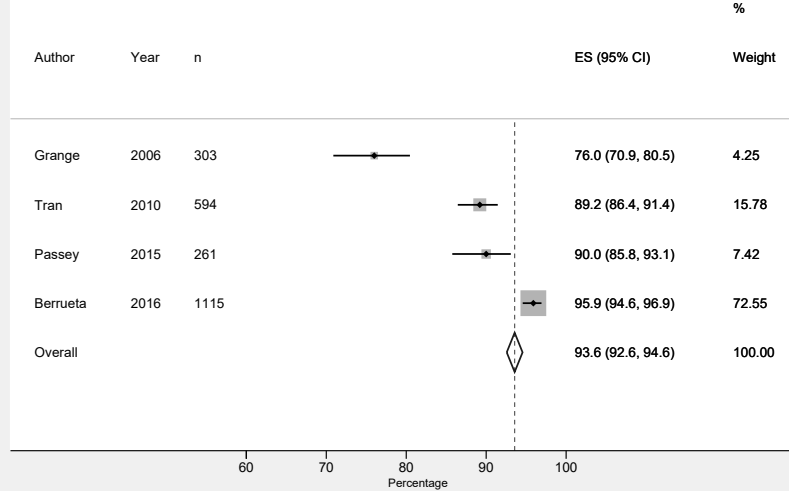

**Figure 4: Meta-analysis: Performance of "ADVISE" often/always**

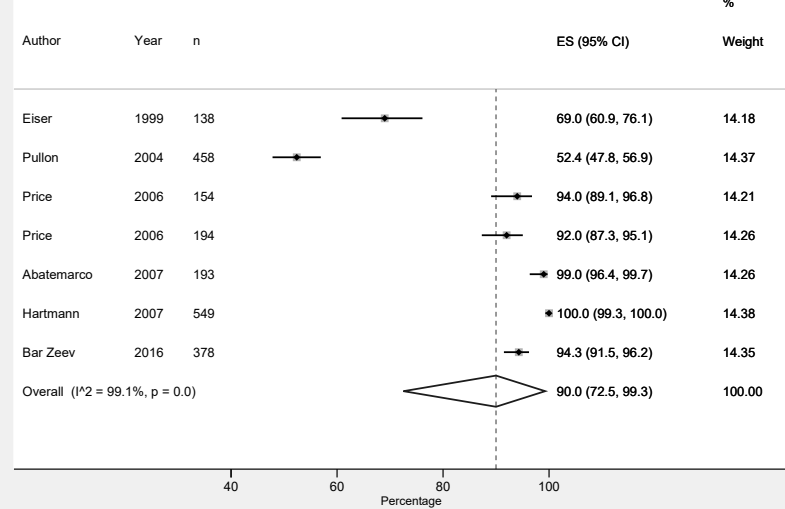

1  
2  
3  
4  
5  
6  
7  
8  
9  
10  
11  
12  
13  
14  
15  
16  
17  
18  
19  
20  
21  
22  
23  
24  
25  
26  
27  
28  
29  
30  
31  
32  
33  
34  
35  
36  
37  
38  
39  
40  
41  
42  
43  
44  
45  
46

Figure 5: Meta-analysis: Performance of "ADVISE" always/all

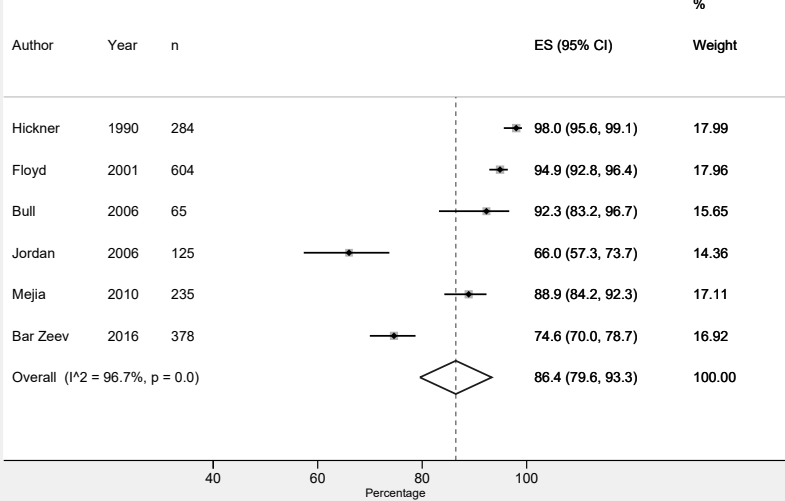

Figure 6: Meta-analysis: Performance of "ADVISE" Yes

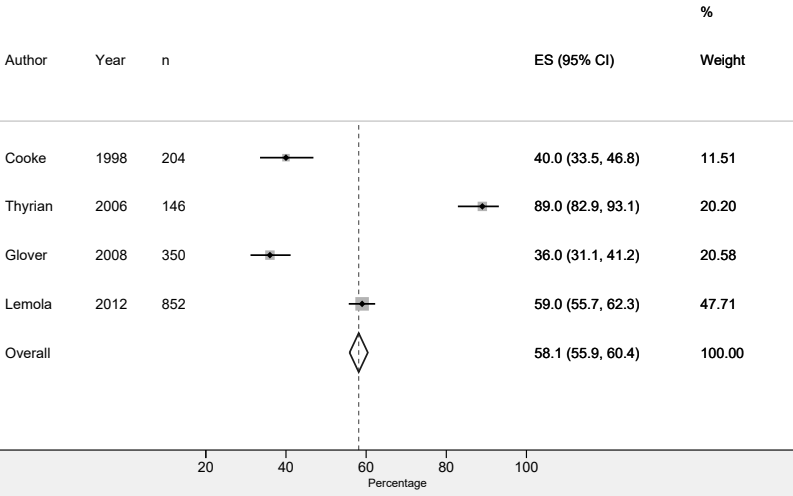

Figure 7: Meta-analysis: Performance of "ADVISE" women's report

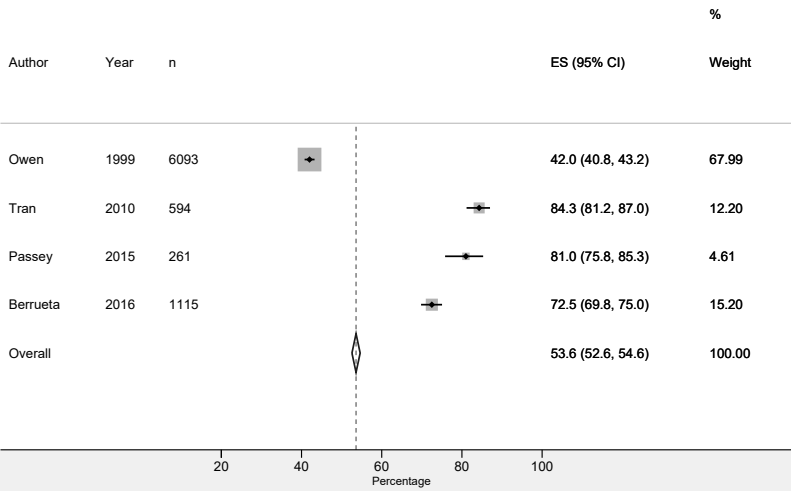

Figure 8: Meta-analysis: Performance of "ASSESS" Motivation to quit often/always

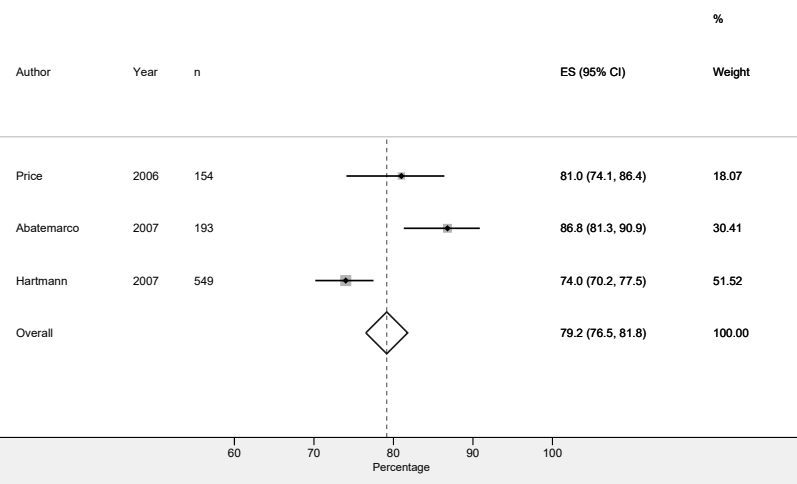

1  
2  
3  
4  
5  
6  
7  
8  
9  
10  
11  
12  
13  
14  
15  
16  
17  
18  
19  
20  
21  
22  
23  
24  
25  
26  
27  
28  
29  
30  
31  
32  
33  
34  
35  
36  
37  
38  
39  
40  
41  
42  
43  
44  
45  
46



1  
2  
3  
4  
5  
6  
7  
8  
9  
10  
11  
12  
13  
14  
15  
16  
17  
18  
19  
20  
21  
22  
23  
24  
25  
26  
27  
28  
29  
30  
31  
32  
33  
34  
35  
36  
37  
38  
39  
40  
41  
42  
43  
44  
45  
46

Figure 13: Meta-analysis: Performance of "ASSIST" Quit plan often/always



Figure 14: Meta-analysis: Performance of "ARRANGE" Referral often/always



Figure 15: Meta-analysis: "Prescribing NRT" often/always



Figure 16: Meta-analysis: "Prescribing NRT" always/all

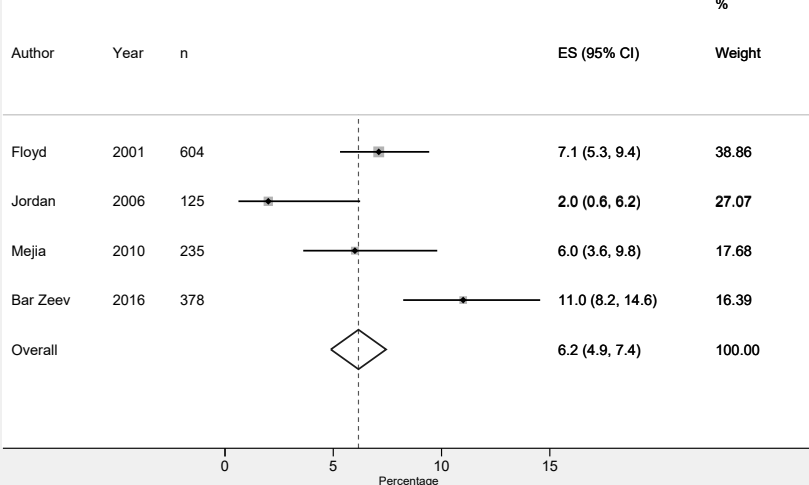

**Figure 17:** Meta-analysis: "Prescribing NRT" Yes



Review only

# Reporting checklist for meta-analysis of observational studies.

Based on the MOOSE guidelines.

## Instructions to authors

Complete this checklist by entering the page numbers from your manuscript where readers will find each of the items listed below.

Your article may not currently address all the items on the checklist. Please modify your text to include the missing information. If you are certain that an item does not apply, please write "n/a" and provide a short explanation.

Upload your completed checklist as an extra file when you submit to a journal.

In your methods section, say that you used the MOOSE reporting guidelines, and cite them as:

Stroup DF, Berlin JA, Morton SC, Olkin I, Williamson GD, Rennie D, Moher D, Becker BJ, Sipe TA, Thacker SB. Meta-analysis of observational studies in epidemiology: a proposal for reporting. Meta-analysis Of Observational Studies in Epidemiology (MOOSE) group. JAMA. 2000; 283(15):2008-2012.

|     | Reporting Item                                                                                                                                                                                                                                                                                                                     | Page Number |
|-----|------------------------------------------------------------------------------------------------------------------------------------------------------------------------------------------------------------------------------------------------------------------------------------------------------------------------------------|-------------|
| #1  | Identify the study as a meta-analysis of observational research                                                                                                                                                                                                                                                                    | NA          |
| #2  | Provide a structured summary including, as applicable: background; objectives; data sources; study eligibility criteria, participants, and interventions; study appraisal and synthesis methods; results; limitations; conclusions and implications of key findings; systematic review registration number (From PRISMA checklist) | 2-3         |
| #3a | Problem definition                                                                                                                                                                                                                                                                                                                 | 7           |
| #3b | Hypothesis statement                                                                                                                                                                                                                                                                                                               | NA          |
| #3c | Description of study outcomes                                                                                                                                                                                                                                                                                                      | 11-16       |
| #3d | Type of exposure or intervention used                                                                                                                                                                                                                                                                                              | NA          |
| #3e | Type of study designs used                                                                                                                                                                                                                                                                                                         | 9, 11       |

|    |          |     |                                                                          |      |
|----|----------|-----|--------------------------------------------------------------------------|------|
| 1  |          | #3f | Study population                                                         | 12   |
| 2  |          |     |                                                                          |      |
| 3  | Search   | #4a | Qualifications of searchers (eg, librarians and investigators)           | 8    |
| 4  | strategy |     |                                                                          |      |
| 5  |          |     |                                                                          |      |
| 6  |          |     |                                                                          |      |
| 7  |          | #4b | Search strategy, including time period included in the synthesis and     | 7    |
| 8  |          |     | keywords                                                                 |      |
| 9  |          |     |                                                                          |      |
| 10 |          |     |                                                                          |      |
| 11 |          | #4c | Effort to include all available studies, including contact with authors  | NA   |
| 12 |          |     |                                                                          |      |
| 13 |          | #4d | Databases and registries searched                                        | 7    |
| 14 |          |     |                                                                          |      |
| 15 |          | #4e | Search software used, name and version, including special features       | 7    |
| 16 |          |     | used (eg, explosion)                                                     |      |
| 17 |          |     |                                                                          |      |
| 18 |          |     |                                                                          |      |
| 19 |          | #4f | Use of hand searching (eg, reference lists of obtained articles)         | 7-8  |
| 20 |          |     |                                                                          |      |
| 21 |          |     |                                                                          |      |
| 22 |          | #4g | List of citations located and those excluded, including justification    | 7-8  |
| 23 |          |     |                                                                          |      |
| 24 |          | #4h | Method of addressing articles published in languages other than English  | NA   |
| 25 |          |     |                                                                          |      |
| 26 |          | #4i | Method of handling abstracts and unpublished studies                     | 8    |
| 27 |          |     |                                                                          |      |
| 28 |          |     |                                                                          |      |
| 29 |          | #4j | Description of any contact with authors                                  | NA   |
| 30 |          |     |                                                                          |      |
| 31 |          | #5a | Description of relevance or appropriateness of studies gathered for      | 9-10 |
| 32 |          |     | assessing the hypothesis to be tested                                    |      |
| 33 |          |     |                                                                          |      |
| 34 |          |     |                                                                          |      |
| 35 |          | #5b | Rationale for the selection and coding of data (eg, sound clinical       | 8    |
| 36 |          |     | principles or convenience)                                               |      |
| 37 |          |     |                                                                          |      |
| 38 |          |     |                                                                          |      |
| 39 |          | #5c | Documentation of how data were classified and coded (eg, multiple        | 8-9  |
| 40 |          |     | raters, blinding, and interrater reliability)                            |      |
| 41 |          |     |                                                                          |      |
| 42 |          |     |                                                                          |      |
| 43 |          | #5d | Assessment of confounding (eg, comparability of cases and controls in    | NA   |
| 44 |          |     | studies where appropriate)                                               |      |
| 45 |          |     |                                                                          |      |
| 46 |          | #5e | Assessment of study quality, including blinding of quality assessors;    | 9    |
| 47 |          |     | stratification or regression on possible predictors of study results     |      |
| 48 |          |     |                                                                          |      |
| 49 |          |     |                                                                          |      |
| 50 |          | #5f | Assessment of heterogeneity                                              | 10   |
| 51 |          |     |                                                                          |      |
| 52 |          |     |                                                                          |      |
| 53 |          | #5g | Description of statistical methods (eg, complete description of fixed or | 10   |
| 54 |          |     | random effects models, justification of whether the chosen models        |      |
| 55 |          |     | account for predictors of study results, dose-response models, or        |      |
| 56 |          |     | cumulative meta-analysis) in sufficient detail to be replicated          |      |
| 57 |          |     |                                                                          |      |
| 58 |          |     |                                                                          |      |
| 59 |          |     |                                                                          |      |
| 60 |          |     |                                                                          |      |

|    |     |                                                                                                                           |       |
|----|-----|---------------------------------------------------------------------------------------------------------------------------|-------|
| 1  | #5h | Provision of appropriate tables and graphics                                                                              | 11    |
| 2  |     |                                                                                                                           |       |
| 3  | #6a | Graphic summarizing individual study estimates and overall estimate                                                       | NA    |
| 4  |     |                                                                                                                           |       |
| 5  | #6b | Table giving descriptive information for each study included                                                              | 8     |
| 6  |     |                                                                                                                           |       |
| 7  |     |                                                                                                                           |       |
| 8  | #6c | Results of sensitivity testing (eg, subgroup analysis)                                                                    | 10-11 |
| 9  |     |                                                                                                                           |       |
| 10 | #6d | Indication of statistical uncertainty of findings                                                                         | 11    |
| 11 |     |                                                                                                                           |       |
| 12 | #7a | Quantitative assessment of bias (eg. publication bias)                                                                    | NA    |
| 13 |     |                                                                                                                           |       |
| 14 | #7b | Justification for exclusion (eg, exclusion of non-English-language citations)                                             | NA    |
| 15 |     |                                                                                                                           |       |
| 16 |     |                                                                                                                           |       |
| 17 |     |                                                                                                                           |       |
| 18 | #7c | Assessment of quality of included studies                                                                                 | 18    |
| 19 |     |                                                                                                                           |       |
| 20 |     |                                                                                                                           |       |
| 21 | #8a | Consideration of alternative explanations for observed results                                                            | 21    |
| 22 |     |                                                                                                                           |       |
| 23 | #8b | Generalization of the conclusions (ie, appropriate for the data presented and within the domain of the literature review) | 21    |
| 24 |     |                                                                                                                           |       |
| 25 |     |                                                                                                                           |       |
| 26 |     |                                                                                                                           |       |
| 27 | #8c | Guidelines for future research                                                                                            | 21    |
| 28 |     |                                                                                                                           |       |
| 29 | #8d | Disclosure of funding source                                                                                              | 22    |
| 30 |     |                                                                                                                           |       |
| 31 |     |                                                                                                                           |       |

Reproduced with permission from JAMA. 2000. 283(15):2008-2012. Copyright © 2000 American Medical Association. All rights reserved. This checklist was completed on 14. August 2018 using <http://www.goodreports.org/>, a tool made by the [EQUATOR Network](#) in collaboration with [Penelope.ai](#)
